# Supplementary material for: Hydroboration of carbon dioxide with pinacolborane catalyzed by various aluminum hydrides: a comparative mechanistic study
Source: Royal Society of Chemistry journal article supplement (doi:10.1039/d2cy01024k), 2022-01-01
Supplement: d2cy01024k1.pdf [file d2cy01024k1.pdf]

# Supporting Information

## Hydroboration of Carbon Dioxide with Pinacolborane Catalyzed by Various Aluminum Hydrides: A Comparative Mechanistic Study

*Cai-Qin Li,\*<sup>a</sup> Geng Leng<sup>b</sup> and Weiyi Li\*<sup>c</sup>*

<sup>a</sup> College of Chemistry and Chemical Engineering, Shanxi Datong University, Datong,  
Shanxi, 037009, P. R China.

<sup>b</sup> School of Resources and Environment, University of Electronic Science and  
Technology of China, Chengdu, Sichuan, 611731, P. R China

<sup>c</sup> School of Science, Research Center for Advanced Computation, Xihua University,  
Chengdu, Sichuan, 610039, P. R. China.

Corresponding author's E-mail address: [licaiqin19860217@163.com](mailto:licaiqin19860217@163.com);  
[weiyili@mail.xhu.edu.cn](mailto:weiyili@mail.xhu.edu.cn);

### CONTENTS:

|                                                                                                        |    |
|--------------------------------------------------------------------------------------------------------|----|
| S1: Computational details.....                                                                         | 2  |
| S2: Nucleophilicity indices analysis.....                                                              | 3  |
| S3: Mechanism and energy profile of the reaction mediated by the AlH active species 1, 6<br>and 8..... | 5  |
| S4: Possible competing reactions for the Al acetal intermediates.....                                  | 8  |
| S5: Comparison of geometric optimization in gas phase and solution phase.....                          | 10 |
| S6: Energy summary.....                                                                                | 13 |
| S7: Cartesian coordinates of the optimized structures.....                                             | 23 |

## S1: Computational details.

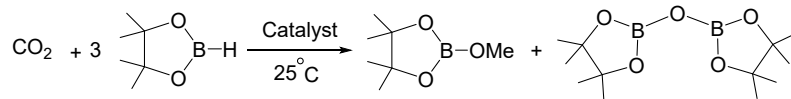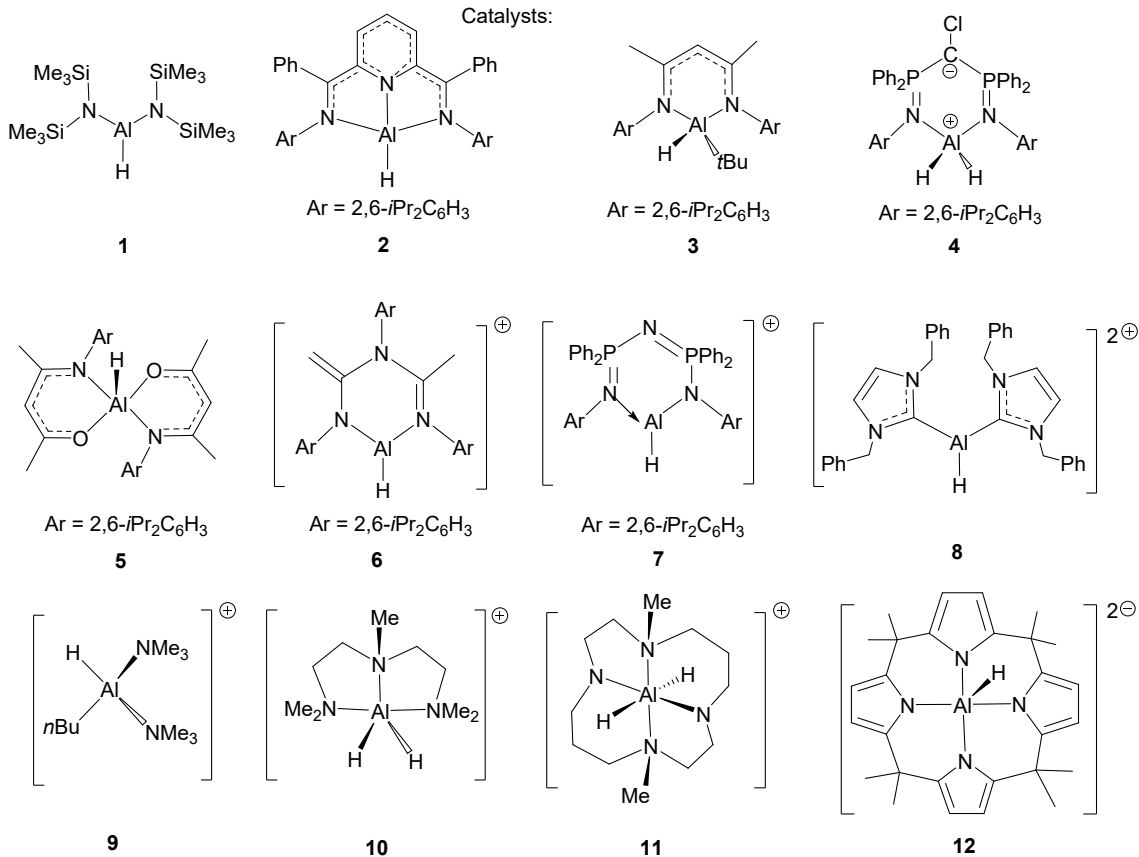

Optimization and frequency calculation in gas phase: M06-2X/6-31G\*, the keyword “Int = ultrafine” was used.

Solvation Method: M06-2X/6-311++G\*\*

For single-point energy calculation, the SCRF = (SMD, ExternalIteration) keyword was used.

## S2: Nucleophilicity indices analysis

**Table S1** Nucleophilicity indices ( $\eta^-$ ) of the AIH active species.

| AIH species | $\epsilon^0_{\text{HOMO}}$<br>(a.u.) | $\epsilon^{-1}_{\text{HOMO}}$<br>(a.u.) | $\epsilon^0_{\text{LUMO}}$<br>(a.u.) | $\epsilon^{-1}_{\text{LUMO}}$<br>(a.u.) | $\mu(N)$<br>(a.u.) | $\mu(N-1)$<br>(a.u.) | $\eta^-$<br>(a.u.) |
|-------------|--------------------------------------|-----------------------------------------|--------------------------------------|-----------------------------------------|--------------------|----------------------|--------------------|
| <b>1</b>    | -0.29687                             | -0.41412                                | 0.00987                              | -0.32749                                | -0.144             | -0.371               | 0.227              |
| <b>2</b>    | -0.18579                             | -0.32942                                | -0.06624                             | -0.20878                                | -0.126             | -0.269               | 0.143              |
| <b>3</b>    | -0.25686                             | -0.39560                                | -0.02040                             | -0.28239                                | -0.139             | -0.339               | 0.200              |
| <b>4</b>    | -0.24604                             | -0.36678                                | -0.02647                             | -0.25094                                | -0.136             | -0.309               | 0.173              |
| <b>5</b>    | -0.27201                             | -0.38708                                | -0.01437                             | -0.30581                                | -0.143             | -0.346               | 0.203              |
| <b>6</b>    | -0.36834                             | -0.49372                                | -0.13200                             | -0.26404                                | -0.250             | -0.379               | 0.129              |
| <b>7</b>    | -0.37828                             | -0.48592                                | -0.11485                             | -0.20551                                | -0.247             | -0.348               | 0.099              |
| <b>8</b>    | -0.39539                             | -0.54575                                | -0.28735                             | -0.42915                                | -0.341             | -0.487               | 0.146              |
| <b>9</b>    | -0.43234                             | -0.64339                                | -0.11586                             | -0.23450                                | -0.274             | -0.439               | 0.165              |
| <b>10</b>   | -0.44658                             | -0.64252                                | -0.11185                             | -0.23888                                | -0.279             | -0.441               | 0.161              |
| <b>11</b>   | -0.38824                             | -0.55594                                | -0.09979                             | -0.43502                                | -0.244             | -0.495               | 0.251              |
| <b>12</b>   | -0.01232                             | -0.24018                                | 0.14482                              | -0.18320                                | 0.066              | -0.212               | 0.278              |

**Table S2** Nucleophilicity indices ( $\eta^-$ ) of the AI formate IMs.

| AIH species   | $\epsilon^0_{\text{HOMO}}$<br>(a.u.) | $\epsilon^{-1}_{\text{HOMO}}$<br>(a.u.) | $\epsilon^0_{\text{LUMO}}$<br>(a.u.) | $\epsilon^{-1}_{\text{LUMO}}$<br>(a.u.) | $\mu(N)$<br>(a.u.) | $\mu(N-1)$<br>(a.u.) | $\eta^-$<br>(a.u.) |
|---------------|--------------------------------------|-----------------------------------------|--------------------------------------|-----------------------------------------|--------------------|----------------------|--------------------|
| <b>1-IM1</b>  | -0.29632                             | -0.40941                                | -0.01092                             | -0.32691                                | -0.154             | -0.368               | 0.214              |
| <b>2-IM1</b>  | -0.17927                             | -0.32378                                | -0.06540                             | -0.20136                                | -0.122             | -0.262               | 0.140              |
| <b>3-IM1</b>  | -0.26626                             | -0.39561                                | -0.02158                             | -0.28416                                | -0.144             | -0.340               | 0.200              |
| <b>4-IM1</b>  | -0.26160                             | -0.37063                                | -0.03336                             | -0.26431                                | -0.147             | -0.317               | 0.170              |
| <b>5-IM1</b>  | -0.28148                             | -0.38704                                | -0.02783                             | -0.31363                                | -0.155             | -0.350               | 0.195              |
| <b>6-IM1</b>  | -0.36485                             | -0.48747                                | -0.12978                             | -0.37676                                | -0.247             | -0.432               | 0.185              |
| <b>7-IM1</b>  | -0.37534                             | -0.48071                                | -0.11395                             | -0.40889                                | -0.245             | -0.445               | 0.200              |
| <b>8-IM1</b>  | -0.38515                             | -0.56336                                | -0.28797                             | -0.43380                                | -0.337             | -0.499               | 0.163              |
| <b>9-IM1</b>  | -0.43172                             | -0.63780                                | -0.11669                             | -0.24781                                | -0.275             | -0.444               | 0.169              |
| <b>10-IM1</b> | -0.44503                             | -0.63852                                | -0.10925                             | -0.25310                                | -0.277             | -0.446               | 0.169              |
| <b>11-IM1</b> | -0.40648                             | -0.56685                                | -0.10085                             | -0.45700                                | -0.254             | -0.512               | 0.258              |
| <b>12-IM1</b> | -0.02193                             | -0.12018                                | 0.14107                              | -0.06038                                | 0.060              | -0.090               | 0.150              |

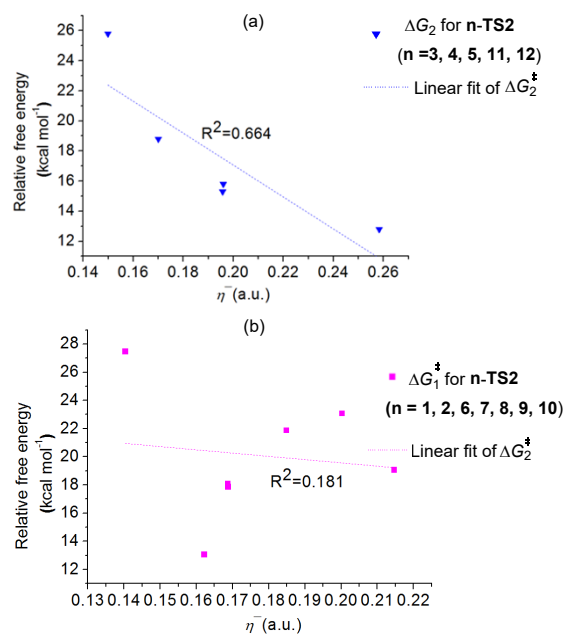

**Figure. S1** Relationship between the nucleophilicity indices ( $\eta^-$ ) of the Al formate IMs and free energy barrier ( $\Delta G_2^\ddagger$ ) for nucleophilic attack of the Al formate IMs to HBpin.

**Table S3.** Free energy barrier Overall  $\Delta G_2^\ddagger$ , activation energies  $\Delta E_2^\ddagger$ , distortion energies  $\Delta E_{\text{dist}}^\ddagger$  and interaction energies  $\Delta E_{\text{int}}^\ddagger$  (all in kcal mol<sup>-1</sup>) for the TSs **n-TS2**. Free Al formate IM **n-IM1** and HBpin is chosen as zero-energy reference.

| Transition state | $\Delta G_2^\ddagger$ | $\Delta E_2^\ddagger$ | $\Delta E_{\text{dist}}^\ddagger$ |       |       | $\Delta E_{\text{int}}^\ddagger$ |
|------------------|-----------------------|-----------------------|-----------------------------------|-------|-------|----------------------------------|
|                  |                       |                       | Al-formate                        | HBpin | total |                                  |
| <b>1-TS2</b>     | 19.1                  | 4.4                   | 13.2                              | 4.8   | 18.2  | -13.8                            |
| <b>2-TS2</b>     | 27.5                  | 10.1                  | 17.6                              | 5.2   | 22.8  | -12.8                            |
| <b>3-TS2</b>     | 15.8                  | 2.3                   | 6.3                               | 4.5   | 10.8  | -8.4                             |
| <b>4-TS2</b>     | 18.8                  | 4.5                   | 0.9                               | 7.5   | 8.4   | -3.9                             |
| <b>5-TS2</b>     | 15.3                  | -2.5                  | 0.9                               | 7.7   | 8.6   | -11.1                            |
| <b>6-TS2</b>     | 21.9                  | 6.1                   | 29.0                              | 7.3   | 36.4  | -30.3                            |
| <b>7-TS2</b>     | 23.1                  | 6.4                   | 26.7                              | 6.7   | 33.4  | -27.0                            |
| <b>8-TS2</b>     | 13.1                  | -0.8                  | 14.7                              | 6.8   | 21.5  | -22.3                            |
| <b>9-TS2</b>     | 18.1                  | 4.1                   | 9.0                               | 5.5   | 14.5  | -10.4                            |
| <b>10-TS2</b>    | 17.9                  | 5.4                   | 9.3                               | 6.8   | 16.1  | -10.7                            |
| <b>11-TS2</b>    | 12.8                  | -0.8                  | 1.5                               | 8.3   | 9.8   | -10.6                            |
| <b>12-TS2</b>    | 25.8                  | 11.8                  | 9.1                               | 9.7   | 18.8  | -7.0                             |

**S3: Mechanism and energy profile of the reaction mediated by the AlH active species 1, 6 and 8**

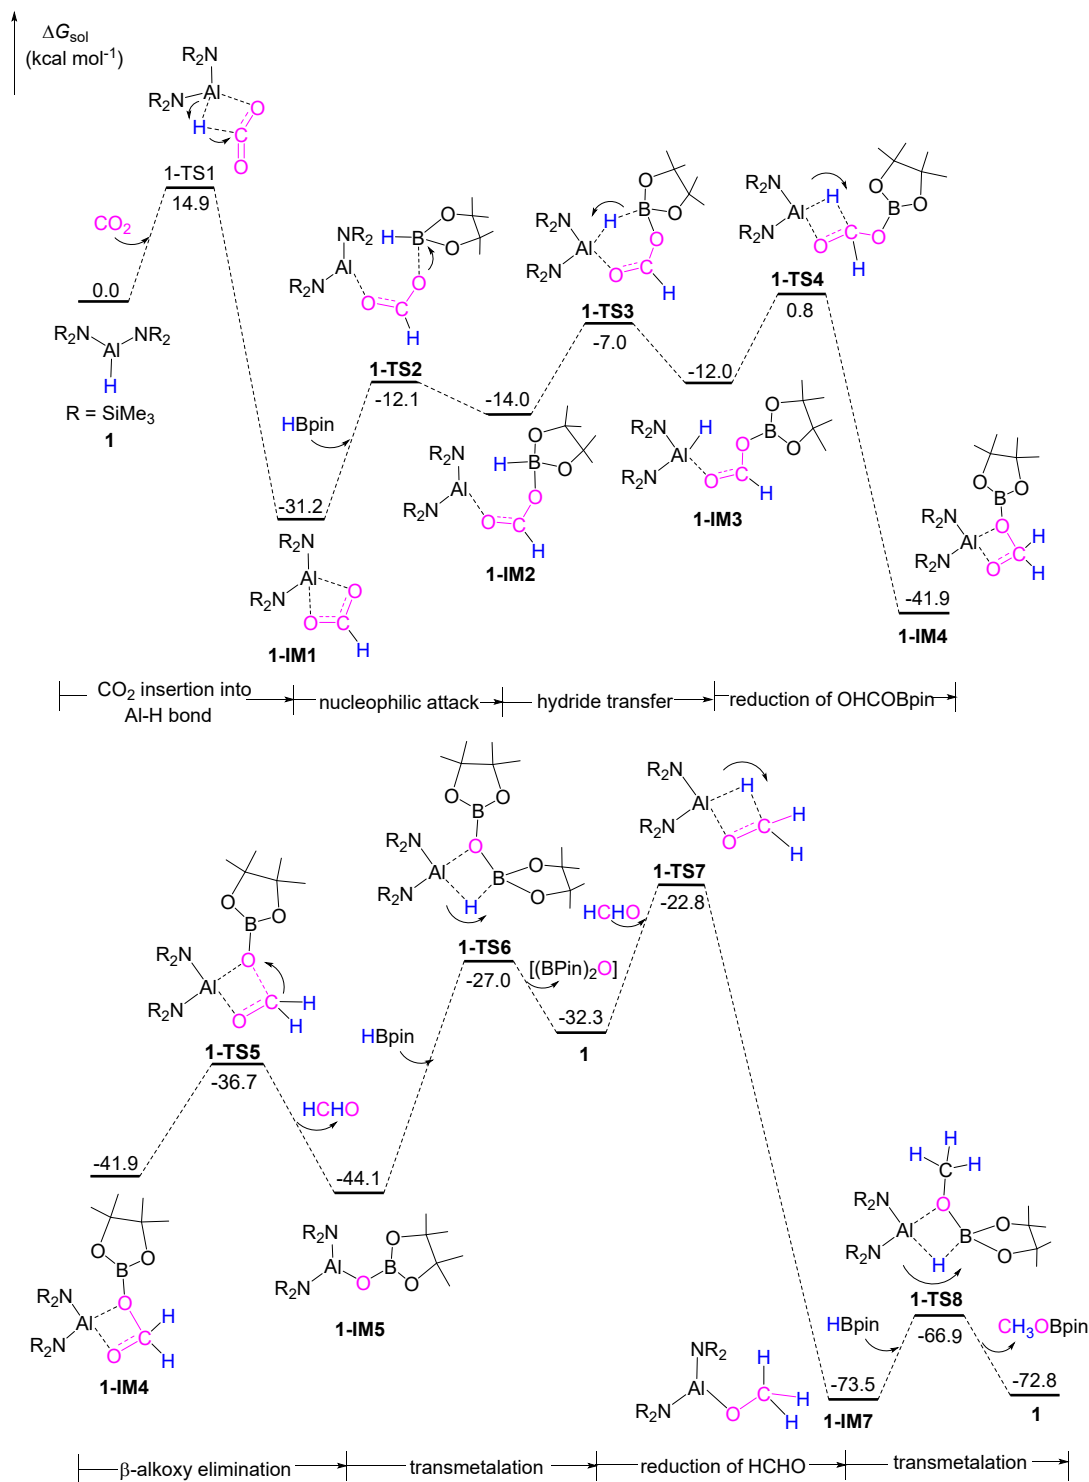

**Figure S2.** Free energy profile for the hydroboration of CO<sub>2</sub> with HBpin catalyzed by the neutral AlH active species **1**.

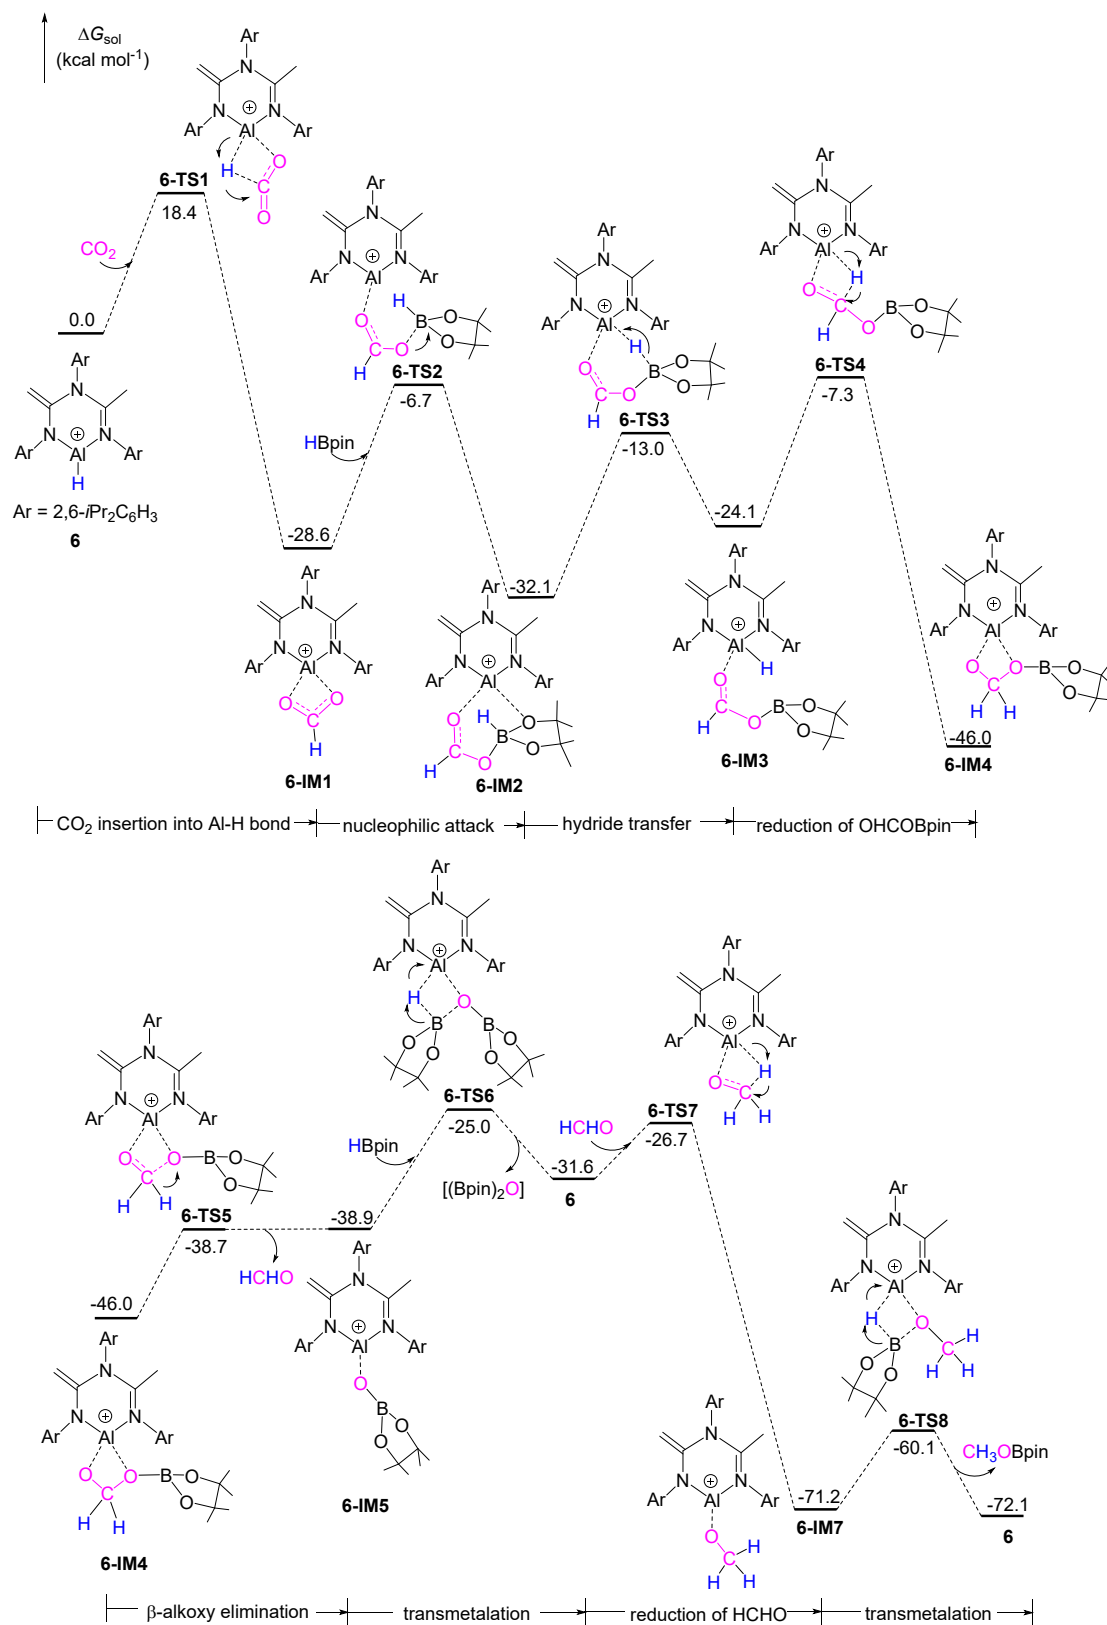

**Figure S3.** Free energy profile for the hydroboration of CO<sub>2</sub> with HBpin catalyzed by the cationic AlH active species **6**.

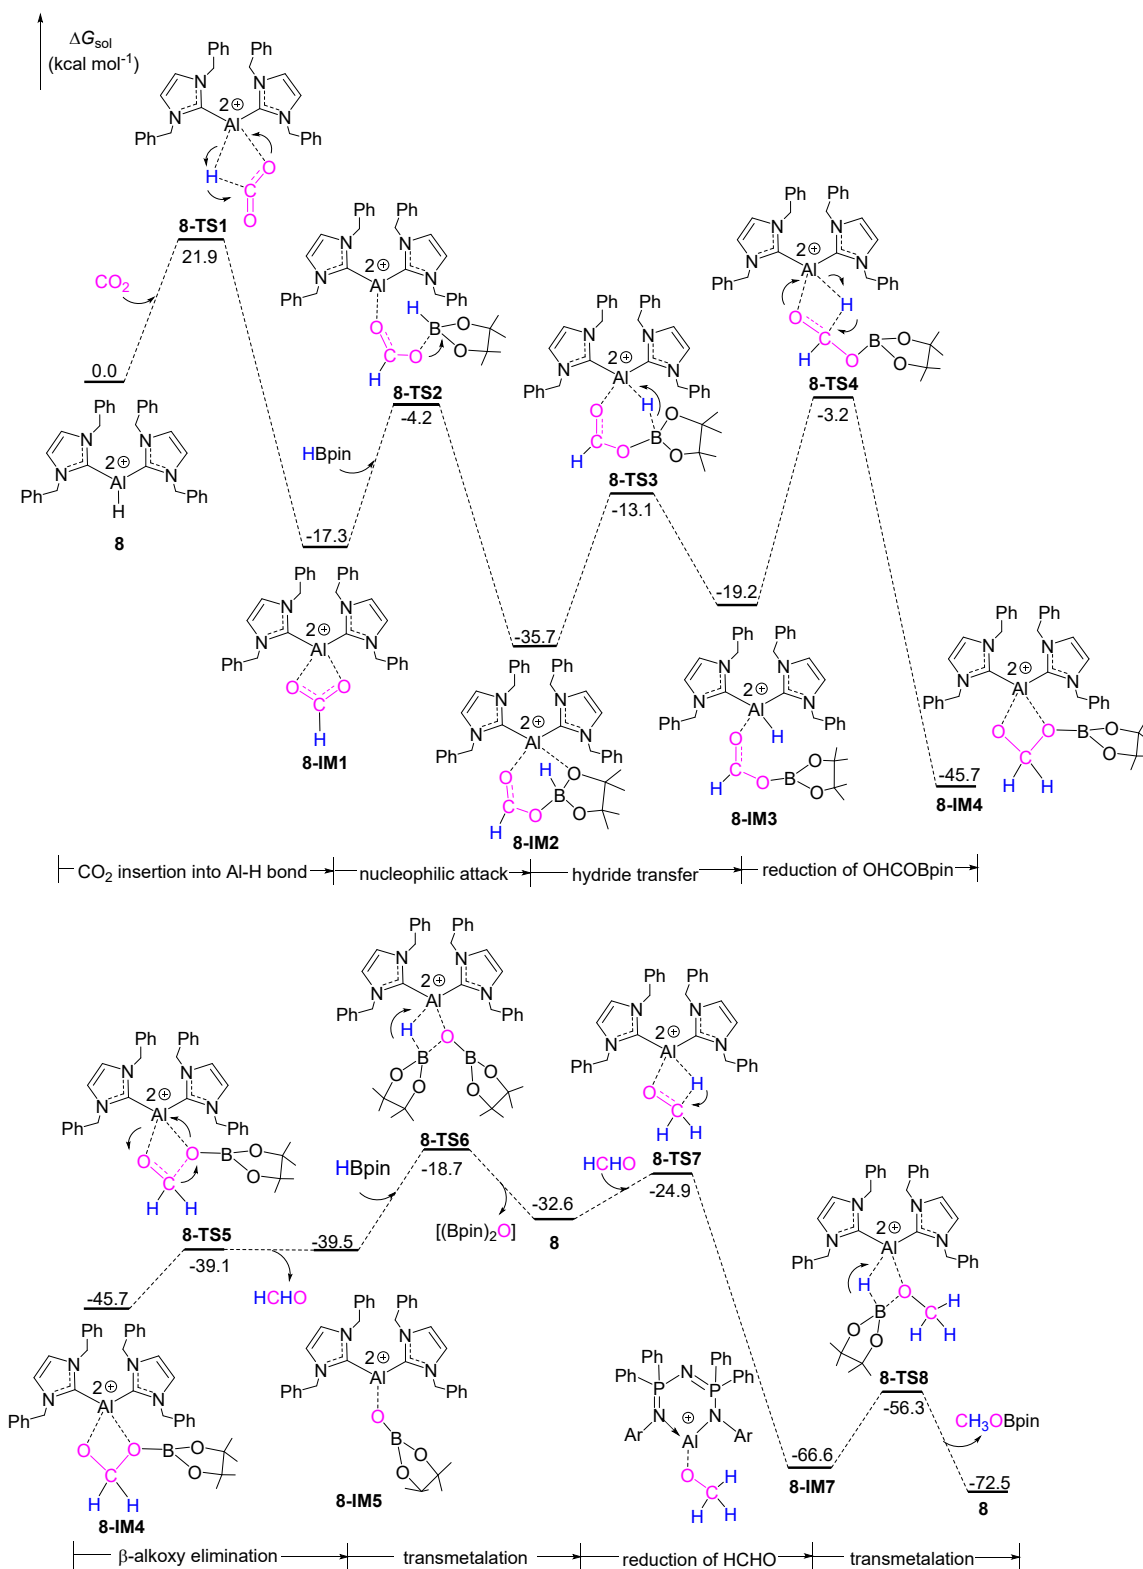

**Figure S4.** Free energy profile for the hydroboration of CO<sub>2</sub> with HBpin catalyzed by the cationic AlH active species **8**.

### S4: Possible competing reactions for the Al acetal intermediates

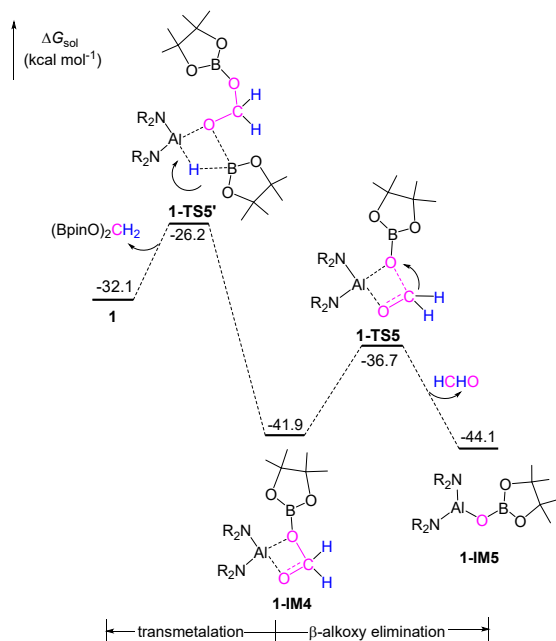

**Figure S5.** Free energy profile of the possible competing reactions for the Al acetal IM 1-IM4, including  $\beta$ -alkoxy elimination and transmetalation with HBpin.

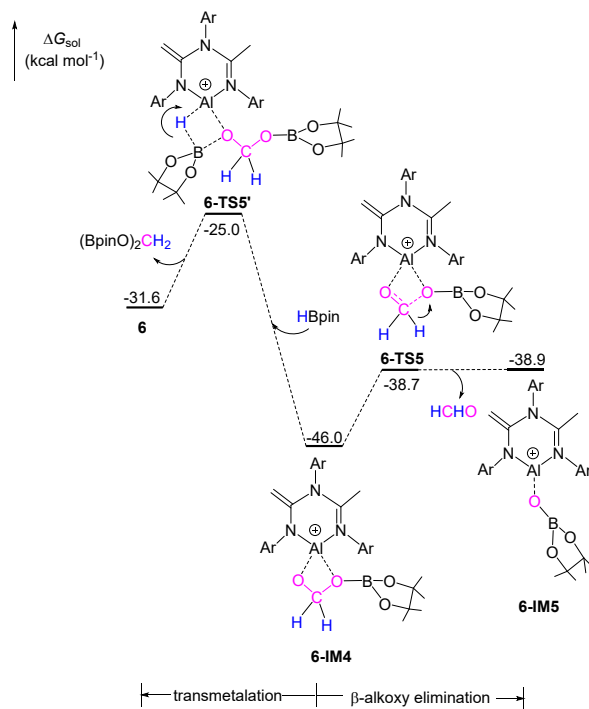

**Figure S6.** Free energy profile of the possible competing reactions for the Al acetal IM 6-IM4, including  $\beta$ -alkoxy elimination and transmetalation with HBpin.



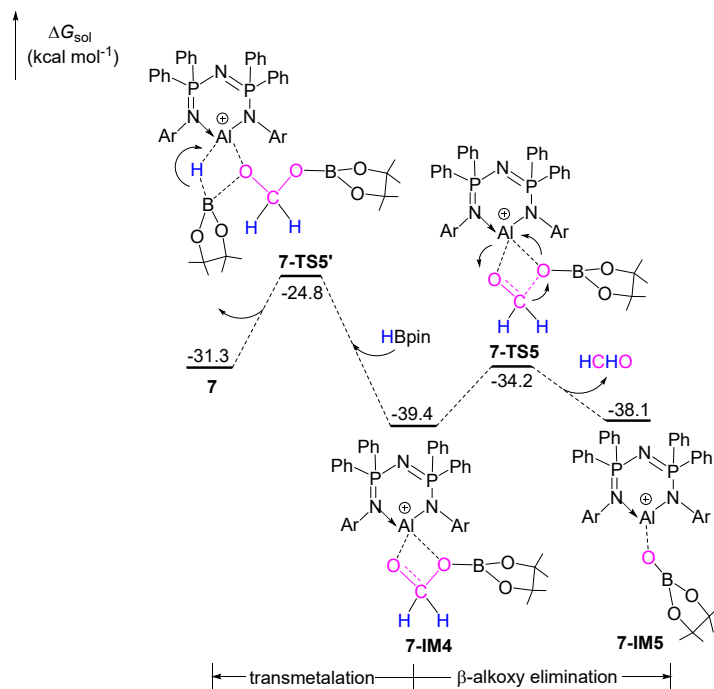

**Figure S7.** Free energy profile of the possible competing reactions for the Al acetal IM 7-IM4, including  $\beta$ -alkoxy elimination and transmetalation with HBpin.

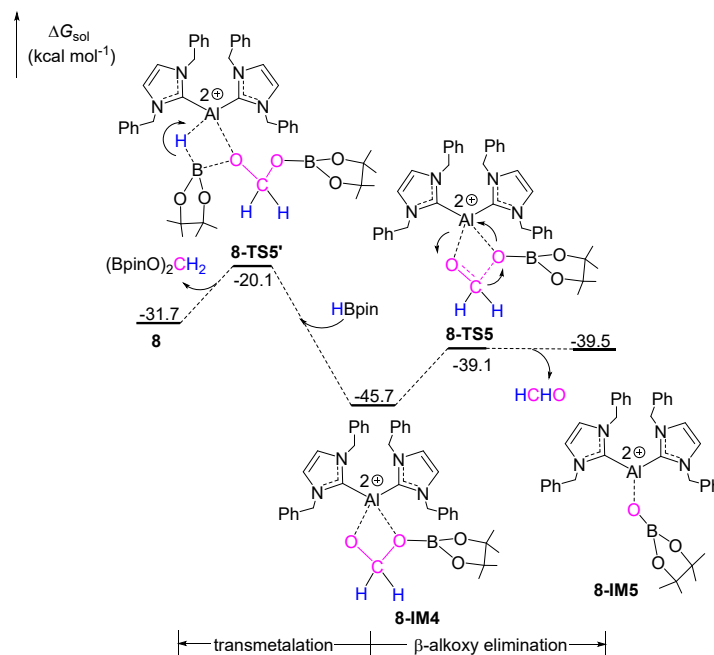

**Figure S8.** Free energy profile of the possible competing reactions for the Al acetal IM 8-IM4, including  $\beta$ -alkoxy elimination and transmetalation with HBpin.

## S5: Comparison of geometric optimization in gas phase and solution phase

To probe the acceptability of the geometric optimization of all stationary points in gas phase, the geometries of all reactants, intermediates, transition states and products in the neutral, cationic and anionic systems were re-optimized with SMD model in the corresponding solvent at the M06-2X/6-31G\* level of theory. Then, the single-point energy calculations were also carried out with SMD model at the M06-2X/6-311++G\*\* level. The computed results from the two approaches are presented in Figure S9-11.

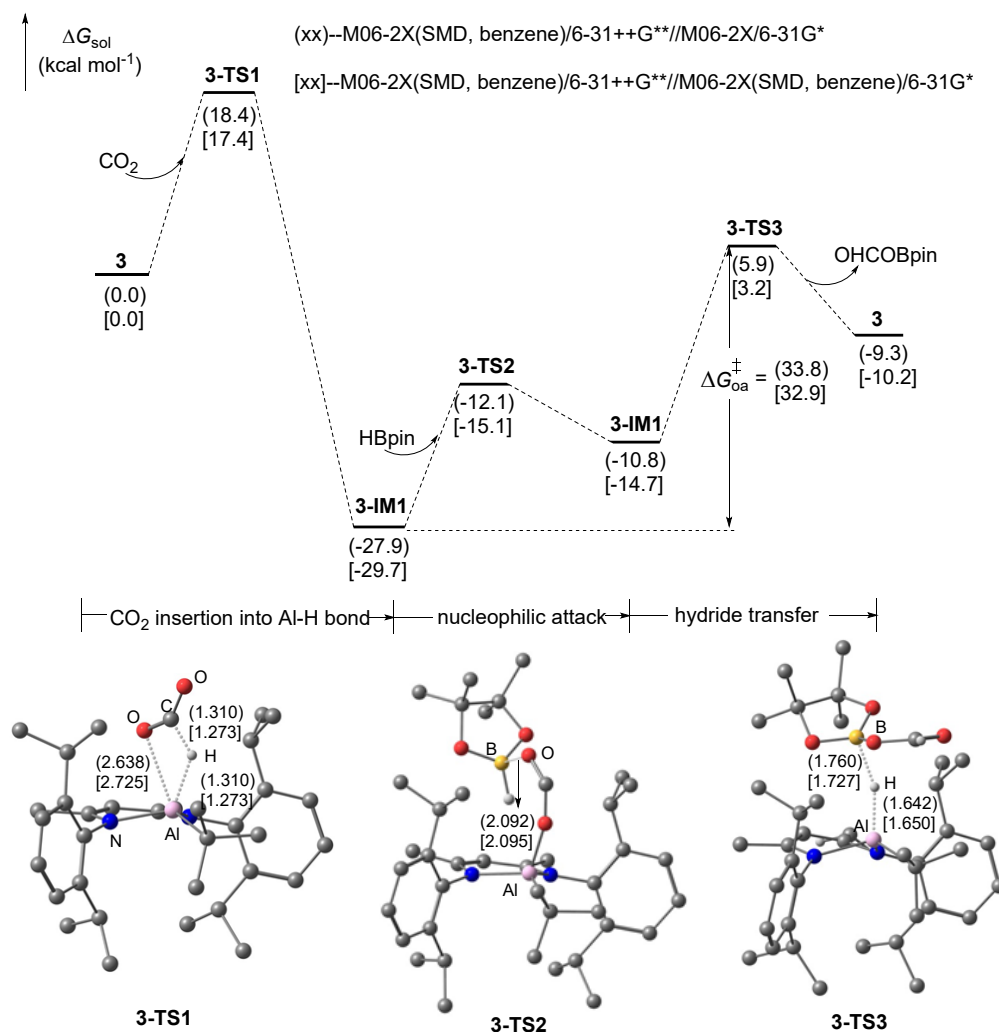

**Figure S9.** Free energy profile of hydroboration of CO<sub>2</sub> with HBpin to boryl formate using neutral AlH hydride **3**. The bond lengths of the critical TSs and relative Gibbs free energies of all stationary points obtained via geometric optimization in gas and solution phase are given in parenthesis and square brackets, respectively.

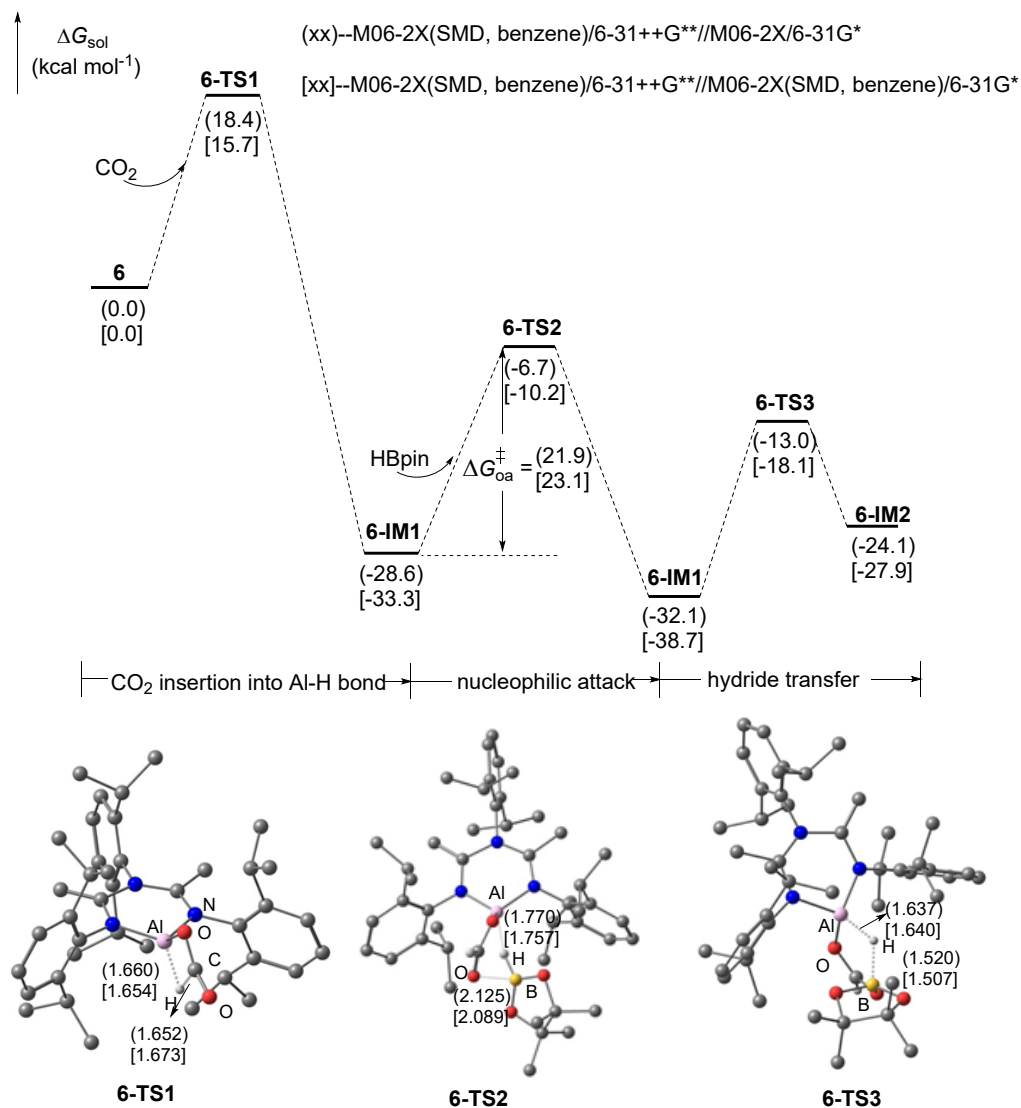

**Figure S10.** Free energy profile of hydroboration of CO<sub>2</sub> with HBpin to boryl formate using cationic AlH hydride **6**. The bond lengths of the critical TSs and relative Gibbs free energies of all stationary points obtained via geometric optimization in gas and solution phase are given in parenthesis and square brackets, respectively.

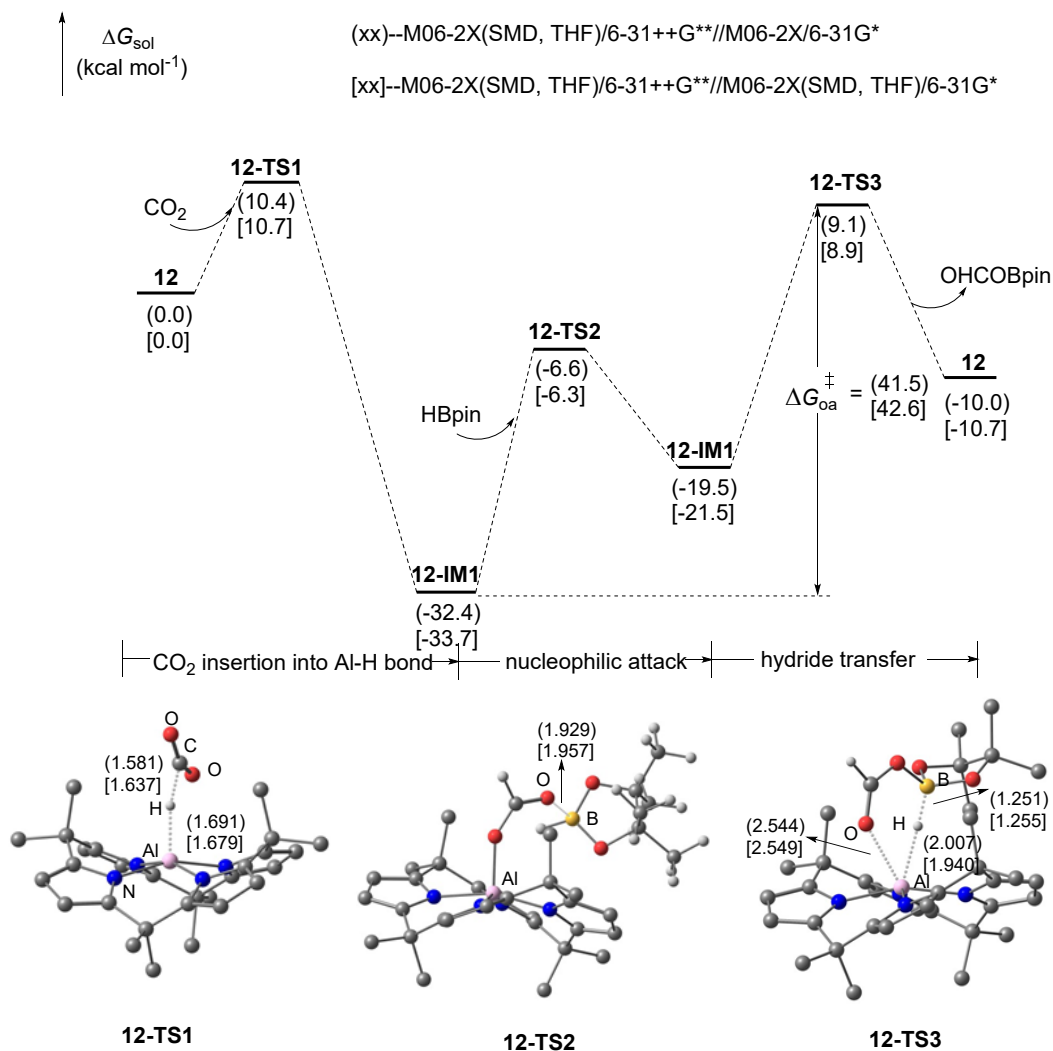

**Figure S11.** Free energy profile of hydroboration of CO<sub>2</sub> with HBpin to boryl formate using anionic AlH hydride **12**. The bond lengths of the critical TSs and relative Gibbs free energies of all stationary points obtained via geometric optimization in gas and solution phase are given in parenthesis and square brackets, respectively.

## S6: Energy summary

**Table S4** Energies of the stationary points involved in the hydroboration of CO<sub>2</sub> with HBpin using ALH active species **1**.

| Species                                 | $H_c^a$ | $G_c^b$  | $E_{sol}^c$<br>(in benzene) | $\Delta H_{sol}^d$ | $\Delta G_{sol}^e$ |
|-----------------------------------------|---------|----------|-----------------------------|--------------------|--------------------|
| CO <sub>2</sub>                         | 0.01547 | -0.00879 | -188.57497                  | -                  | -                  |
| HBpin                                   | 0.20389 | 0.16081  | -411.81383                  | -                  | -                  |
| OHCOBpin                                | 0.22306 | 0.17090  | -600.42246                  | -                  | -                  |
| HCHO                                    | 0.03112 | 0.00566  | -114.48955                  | -                  | -                  |
| [(BpinO) <sub>2</sub> CH <sub>2</sub> ] | 0.43274 | 0.35975  | -1012.30076                 | -                  | -                  |
| [(Bpin) <sub>2</sub> O]                 | 0.39589 | 0.32626  | -897.78368                  | -                  | -                  |
| MeOBpin                                 | 0.24148 | 0.18899  | -526.39048                  | -                  | -                  |
| <b>1</b>                                | 0.50905 | 0.40943  | -1989.62025                 | -                  | -                  |
| <b>1-TS1</b>                            | 0.52521 | 0.42026  | -2178.19112                 | 3.0                | 14.9               |
| <b>1-IM1</b>                            | 0.53080 | 0.42691  | -2178.27121                 | -43.8              | -31.2              |
| <b>1-TS2</b>                            | 0.73566 | 0.61115  | -2590.07801                 | -38.7              | -12.1              |
| <b>1-IM2</b>                            | 0.73666 | 0.61368  | -2590.08356                 | -41.6              | -14.0              |
| <b>1-TS3</b>                            | 0.73433 | 0.61191  | -2590.07069                 | -35.0              | -7.0               |
| <b>1-IM3</b>                            | 0.73538 | 0.60929  | -2590.07595                 | -37.6              | -12.0              |
| <b>1-TS4</b>                            | 0.73387 | 0.61061  | -2590.05688                 | -26.6              | 0.8                |
| <b>1-IM4</b>                            | 0.73936 | 0.61576  | -2590.13019                 | -69.1              | -41.9              |
| <b>1-TS5</b>                            | 0.73649 | 0.61083  | -2590.11695                 | -62.6              | -62.6              |
| <b>1-IM5</b>                            | 0.70288 | 0.57823  | -2475.61223                 | -                  | -                  |
| <b>1-TS5'</b>                           | 0.90624 | 0.76719  | -2887.42694                 | -55.6              | -27.0              |
| <b>1-TS6</b>                            | 0.90624 | 0.76719  | -2887.42694                 | -55.6              | -27.0              |
| <b>1-TS7</b>                            | 0.54220 | 0.44034  | -2104.11992                 | -47.0              | -22.8              |
| <b>1-IM7</b>                            | 0.54824 | 0.44201  | -2104.20228                 | -94.9              | -73.5              |
| <b>1-TS8</b>                            | 0.75202 | 0.62865  | -2515.27947                 | -104.6             | -66.9              |

*a:*  $H_c$  is the enthalpy correction calculated at the M06-2X/6-31G\* level in gas phase at 298 K;

*b:*  $G_c$  is the Gibbs free energy correction calculated at the M06-2X/6-31G\* level in gas phase at 298 K;

*c:*  $E_{sol}$  is the electron energy in the solvent after PCM correction calculated at the M06-2X/(SMD, benzene)//6-311++G(d, p) level;

*d:*  $\Delta H_{sol}$  is the relative enthalpy energy in the solvent at 298 K  $H_{sol} = H_c + E_{sol}$ .

*e:*  $\Delta G_{sol}$  is the relative Gibbs free energy in the solvent at 298 K.  $G_{sol} = G_c + E_{sol}$ .

**Table S5** Energies of the stationary points involved in the hydroboration of CO<sub>2</sub> with HBpin using AIH active species **2**.

| Species         | $H_c$   | $G_c$    | $E_{sol}$<br>(in benzene) | $\Delta H_{sol}$ | $\Delta G_{sol}$ |
|-----------------|---------|----------|---------------------------|------------------|------------------|
| CO <sub>2</sub> | 0.01547 | -0.00879 | -188.57621                | -                | -                |
| HBpin           | 0.20389 | 0.16081  | -411.81505                | -                | -                |
| <b>2</b>        | 0.85863 | 0.73552  | -2073.97200               | -                | -                |
| <b>2-TS1</b>    | 0.87429 | 0.74760  | -2262.53863               | 6.1              | 19.1             |
| <b>2-IM1</b>    | 0.88014 | 0.75337  | -2262.61698               | -39.4            | -26.4            |
| <b>2-TS2</b>    | 1.08492 | 0.94198  | -2674.41601               | -28.8            | 1.1              |
| <b>2-IM2</b>    | 1.08598 | 0.94457  | -2674.42029               | -30.8            | 0.0              |
| <b>2-TS3</b>    | 1.08358 | 0.94301  | -2674.40828               | -24.7            | 6.6              |
| <b>2-IM3</b>    | 1.08529 | 0.94319  | -2674.41412               | -27.3            | 3.0              |

**Table S6** Energies of the stationary points involved in the hydroboration of CO<sub>2</sub> with HBpin using AIH active species **3**.

| Species         | $H_c$   | $G_c$    | $E_{sol}$<br>(in THF) | $\Delta H_{sol}$ | $\Delta G_{sol}$ |
|-----------------|---------|----------|-----------------------|------------------|------------------|
| CO <sub>2</sub> | 0.01547 | -0.00879 | -188.57497            | -                | -                |
| HBpin           | 0.20389 | 0.16081  | -411.81383            | -                | -                |
| <b>3</b>        | 0.81963 | 0.70991  | -1640.00869           | -                | -                |
| <b>3-TS1</b>    | 0.83664 | 0.72082  | -1828.57403           | 7.0              | 18.4             |
| <b>3-IM1</b>    | 0.84111 | 0.72500  | -1828.65209           | -39.2            | -27.9            |
| <b>3-TS2</b>    | 1.04608 | 0.90737  | -2240.46218           | -36.1            | -12.1            |
| <b>3-IM2</b>    | 1.04747 | 0.91029  | -2240.46302           | -35.8            | -10.8            |
| <b>3-TS3</b>    | 1.04370 | 0.90824  | -2240.43446           | -20.2            | 5.9              |

**Table S7** Energies of the stationary points involved in the hydroboration of CO<sub>2</sub> with HBpin using AIH active species **4**.

| Species         | $H_c$   | $G_c$    | $E_{sol}$<br>(in benzene) | $\Delta H_{sol}$ | $\Delta G_{sol}$ |
|-----------------|---------|----------|---------------------------|------------------|------------------|
| CO <sub>2</sub> | 0.01547 | -0.00879 | -188.57621                | -                | -                |
| HBpin           | 0.20389 | 0.16081  | -411.81505                | -                | -                |
| <b>4</b>        | 0.99042 | 0.84926  | -3395.51212               | -                | -                |
| <b>4-TS1</b>    | 1.00701 | 0.86196  | -3584.07184               | 10.3             | 23.1             |
| <b>4-IM1</b>    | 1.01247 | 0.86992  | -3584.14706               | -33.5            | -19.1            |
| <b>4-TS2</b>    | 1.21740 | 1.05357  | -3995.95373               | -28.3            | -0.3             |
| <b>4-IM2</b>    | 1.21847 | 1.05420  | -3995.95386               | -28.3            | 0.0              |
| <b>4-TS3</b>    | 1.21538 | 1.05336  | -3995.93537               | -18.1            | 11.1             |

**Table S8** Energies of the stationary points involved in the hydroboration of CO<sub>2</sub> with HBpin using AIH active species **5**.

| Species         | $H_c$   | $G_c$    | $E_{sol}$<br>(in CH <sub>2</sub> Cl <sub>2</sub> ) | $\Delta H_{sol}$ | $\Delta G_{sol}$ |
|-----------------|---------|----------|----------------------------------------------------|------------------|------------------|
| CO <sub>2</sub> | 0.01547 | -0.00879 | -188.57421                                         | -                | -                |
| HBpin           | 0.20389 | 0.16081  | -411.81623                                         | -                | -                |
| <b>5</b>        | 0.81408 | 0.69404  | -1827.44786                                        | -                | -                |
| <b>5-TS1</b>    | 0.83032 | 0.70645  | -2016.01150                                        | 7.1              | 19.9             |
| <b>5-IM1</b>    | 0.83524 | 0.70942  | -2016.09076                                        | -39.5            | -27.9            |
| <b>5-TS2</b>    | 1.04043 | 0.89855  | -2427.91091                                        | -41.2            | -12.6            |
| <b>5-IM2</b>    | 1.04217 | 0.90176  | -2427.91177                                        | -40.6            | -11.1            |
| <b>5-TS3</b>    | 1.03873 | 0.89959  | -2427.88777                                        | -27.7            | 2.6              |

**Table S9** Energies of the stationary points involved in the hydroboration of CO<sub>2</sub> with HBpin using AIH active species **6**.

| Species                                 | $H_c$   | $G_c$    | $E_{sol}$<br>(in benzene) | $\Delta H_{sol}$ | $\Delta G_{sol}$ |
|-----------------------------------------|---------|----------|---------------------------|------------------|------------------|
| CO <sub>2</sub>                         | 0.01547 | -0.00879 | -188.57497                | -                | -                |
| HBpin                                   | 0.20389 | 0.16081  | -411.81383                | -                | -                |
| OHCOBpin                                | 0.22306 | 0.17090  | -600.42246                | -                | -                |
| HCHO                                    | 0.03112 | 0.00566  | -114.48955                | -                | -                |
| [(BpinO) <sub>2</sub> CH <sub>2</sub> ] | 0.43274 | 0.35975  | -1012.30076               | -                | -                |
| [(Bpin) <sub>2</sub> O]                 | 0.39589 | 0.32626  | -897.78368                | -                | -                |
| MeOBpin                                 | 0.24148 | 0.18899  | -526.39048                | -                | -                |
| <b>6</b>                                | 0.94432 | 0.81604  | -1964.89718               | -                | -                |
| <b>6-TS1</b>                            | 0.96071 | 0.82560  | -2153.46118               | 7.5              | 18.4             |
| <b>6-IM1</b>                            | 0.96613 | 0.83156  | -2153.54209               | -39.9            | -28.6            |
| <b>6-TS2</b>                            | 1.17101 | 1.01768  | -2565.34625               | -33.2            | -6.7             |
| <b>6-IM2</b>                            | 1.17364 | 1.02910  | -2565.39815               | -64.1            | -32.1            |
| <b>6-TS3</b>                            | 1.17045 | 1.02072  | -2565.35931               | -41.8            | -13.0            |
| <b>6-IM3</b>                            | 1.17079 | 1.01557  | -2565.37188               | -49.4            | -24.1            |
| <b>6-TS4</b>                            | 1.16942 | 1.01259  | -2565.34220               | -31.7            | -7.3             |
| <b>6-IM4</b>                            | 1.17504 | 1.02044  | -2565.41165               | -71.7            | -46.0            |
| <b>6-TS5</b>                            | 1.17197 | 1.01747  | -2565.39710               | -64.5            | -38.7            |
| <b>6-IM5</b>                            | 1.13841 | 0.98586  | -2450.88190               | -46.0            | -46.0            |
| <b>6-TS5'</b>                           | 1.38004 | 1.20565  | -2977.21563               | -64.1            | -23.7            |
| <b>6-TS6</b>                            | 1.34311 | 1.17460  | -2862.70268               | -53.0            | -25.0            |
| <b>6-TS7</b>                            | 0.97740 | 0.84403  | -2079.40137               | -49.1            | -26.7            |
| <b>6-IM7</b>                            | 0.98397 | 0.84831  | -2079.47648               | -92.1            | -71.2            |
| <b>6-TS8</b>                            | 1.18910 | 1.03633  | -2491.29983               | -97.3            | -60.1            |



**Table S10** Energies of the stationary points involved in the hydroboration of CO<sub>2</sub> with HBpin using AlH active species **7**.

| Species                                 | $H_c$   | $G_c$    | $E_{sol}$<br>(in toluene) | $\Delta H_{sol}$ | $\Delta G_{sol}$ |
|-----------------------------------------|---------|----------|---------------------------|------------------|------------------|
| CO <sub>2</sub>                         | 0.01547 | -0.00879 | -188.57490                | -                | -                |
| HBpin                                   | 0.20389 | 0.16081  | -411.81365                | -                | -                |
| OHCOBpin                                | 0.22306 | 0.17090  | -600.42233                | -                | -                |
| HCHO                                    | 0.03112 | 0.00566  | -114.49104                | -                | -                |
| [(BpinO) <sub>2</sub> CH <sub>2</sub> ] | 0.43274 | 0.35975  | -1012.30047               | -                | -                |
| [(Bpin) <sub>2</sub> O]                 | 0.39589 | 0.32626  | -897.78337                | -                | -                |
| MeOBpin                                 | 0.24148 | 0.18899  | -526.39206                | -                | -                |
| <b>7</b>                                | 0.98016 | 0.84125  | -2951.28156               | -                | -                |
| <b>7-TS1</b>                            | 0.99648 | 0.85375  | -3139.84632               | 6.9              | 19.7             |
| <b>7-IM1</b>                            | 1.00185 | 0.85912  | -3139.92685               | -40.3            | -27.4            |
| <b>7-TS2</b>                            | 1.20707 | 1.04653  | -3551.73028               | -33.0            | -4.3             |
| <b>7-IM2</b>                            | 1.20986 | 1.05440  | -3551.75862               | -49.1            | -17.2            |
| <b>7-TS3</b>                            | 1.20580 | 1.04724  | -3551.74026               | -40.1            | -10.2            |
| <b>7-IM3</b>                            | 1.20692 | 1.04613  | -3551.75125               | -46.3            | -17.7            |
| <b>7-TS4</b>                            | 1.20494 | 1.03906  | -3551.72161               | -28.9            | -3.6             |
| <b>7-IM4</b>                            | 1.21025 | 1.04762  | -3551.78725               | -66.8            | -39.4            |
| <b>7-TS5</b>                            | 1.20796 | 1.04708  | -3551.77841               | -62.7            | -34.2            |
| <b>7-IM5</b>                            | 1.17404 | 1.01412  | -3437.26777               | -                | -                |
| <b>7-TS5'</b>                           | 1.41480 | 1.23420  | -3963.60477               | -67.9            | -24.8            |
| <b>7-TS6</b>                            | 1.37760 | 1.20253  | -3849.08099               | -51.2            | -20.6            |
| <b>7-TS7</b>                            | 1.01331 | 0.87260  | -3065.78148               | -46.4            | -21.9            |
| <b>7-IM7</b>                            | 1.01963 | 0.87433  | -3065.86336               | -93.8            | -72.2            |
| <b>7-TS8</b>                            | 1.22390 | 1.06437  | -3477.69370               | -104.0           | -64.3            |

**Table S11** Energies of the stationary points involved in the hydroboration of CO<sub>2</sub> with HBpin using AIH active species **8**.

| Species                                 | $H_c$   | $G_c$    | $E_{sol}$<br>(in bromobenzene) | $\Delta H_{sol}^d$ | $\Delta G_{sol}$ |
|-----------------------------------------|---------|----------|--------------------------------|--------------------|------------------|
| CO <sub>2</sub>                         | 0.01547 | -0.00879 | -188.57502                     | -                  | -                |
| HBpin                                   | 0.20389 | 0.16081  | -411.81492                     | -                  | -                |
| OHCOBpin                                | 0.22306 | 0.17090  | -600.42492                     | -                  | -                |
| HCHO                                    | 0.03112 | 0.00566  | -114.49104                     | -                  | -                |
| [(BpinO) <sub>2</sub> CH <sub>2</sub> ] | 0.43274 | 0.35975  | -1012.30369                    | -                  | -                |
| [(Bpin) <sub>2</sub> O]                 | 0.39589 | 0.32626  | -897.78625                     | -                  | -                |
| MeOBpin                                 | 0.24148 | 0.18899  | -526.39206                     | -                  | -                |
| <b>8</b>                                | 0.67062 | 0.55877  | -1853.65542                    | -                  | -                |
| <b>8-TS1</b>                            | 0.68561 | 0.56680  | -2042.21357                    | 11.0               | 21.9             |
| <b>8-IM1</b>                            | 0.69168 | 0.57369  | -2042.28296                    | -28.7              | -17.3            |
| <b>8-TS2</b>                            | 0.89652 | 0.75651  | -2454.09910                    | -28.8              | -4.2             |
| <b>8-IM2</b>                            | 0.89720 | 0.76426  | -2454.15705                    | -64.7              | -35.7            |
| <b>8-TS3</b>                            | 0.89514 | 0.76236  | -2454.11906                    | -42.2              | -13.1            |
| <b>8-IM3</b>                            | 0.89606 | 0.75789  | -2454.12438                    | -44.9              | -19.2            |
| <b>8-TS4</b>                            | 0.89415 | 0.75913  | -2454.10010                    | -30.9              | -3.2             |
| <b>8-IM4</b>                            | 0.89944 | 0.76537  | -2454.17416                    | -74.1              | -45.7            |
| <b>8-TS5</b>                            | 0.89663 | 0.76341  | -2454.16158                    | -67.9              | -39.1            |
| <b>8-IM5</b>                            | 0.86326 | 0.73600  | -2339.64939                    | -                  | -                |
| <b>8-TS5'</b>                           | 1.10432 | 0.95162  | -2865.97372                    | -63.8              | -20.1            |
| <b>8-TS6</b>                            | 1.06869 | 0.91451  | -2751.44896                    | -45.5              | -18.7            |
| <b>8-TS7</b>                            | 0.70222 | 0.59139  | -1968.16115                    | -51.2              | -24.9            |
| <b>8-IM7</b>                            | 0.70970 | 0.59303  | -1968.22913                    | -89.1              | -66.6            |
| <b>8-TS8</b>                            | 0.91428 | 0.77601  | -2380.04987                    | -92.4              | -56.3            |

**Table S12** Energies of the stationary points involved in the hydroboration of CO<sub>2</sub> with HBpin using AlH active species **9**.

| Species         | $H_c$   | $G_c$    | $E_{sol}$<br>(in toluene) | $\Delta H_{sol}$ | $\Delta G_{sol}$ |
|-----------------|---------|----------|---------------------------|------------------|------------------|
| CO <sub>2</sub> | 0.01547 | -0.00879 | -188.57490                | -                | -                |
| HBpin           | 0.20389 | 0.16081  | -411.81365                | -                | -                |
| <b>9</b>        | 0.40351 | 0.33719  | -749.62484                | -                | -                |
| <b>9-TS1</b>    | 0.41947 | 0.34719  | -938.17537                | 15.6             | 27.1             |
| <b>9-IM1</b>    | 0.42520 | 0.35403  | -938.25620                | -31.5            | -19.3            |
| <b>9-TS2</b>    | 0.63025 | 0.53739  | -1350.06327               | -26.7            | -1.1             |
| <b>9-IM2</b>    | 0.63119 | 0.53944  | -1350.06620               | -27.9            | -1.6             |
| <b>9-TS3</b>    | 0.62864 | 0.53737  | -1350.04126               | -13.9            | 12.7             |

**Table S13** Energies of the stationary points involved in the hydroboration of CO<sub>2</sub> with HBpin using AlH active species **10**.

| Species         | $H_c$   | $G_c$    | $E_{sol}$<br>(in THF) | $\Delta H_{sol}$ | $\Delta G_{sol}$ |
|-----------------|---------|----------|-----------------------|------------------|------------------|
| CO <sub>2</sub> | 0.01547 | -0.00879 | -188.57497            | -                | -                |
| HBpin           | 0.20389 | 0.16081  | -411.81383            | -                | -                |
| <b>10</b>       | 0.36894 | 0.31236  | -764.49094            | -                | -                |
| <b>10-TS1</b>   | 0.38543 | 0.32354  | -953.05199            | 10.2             | 22.0             |
| <b>10-IM1</b>   | 0.39120 | 0.33092  | -953.13173            | -36.3            | -23.4            |
| <b>10-TS2</b>   | 0.59634 | 0.51092  | -1364.94094           | -31.8            | -7.7             |
| <b>10-IM2</b>   | 0.59768 | 0.51678  | -1364.94688           | -34.7            | -7.7             |
| <b>10-TS3</b>   | 0.59385 | 0.51064  | -1364.92134           | -21.1            | 4.5              |

**Table S14** Energies of the stationary points involved in the hydroboration of CO<sub>2</sub> with HBpin using AlH active species **11**.

| Species         | $H_c$   | $G_c$    | $E_{sol}$<br>(in THF) | $\Delta H_{sol}$ | $\Delta G_{sol}$ |
|-----------------|---------|----------|-----------------------|------------------|------------------|
| CO <sub>2</sub> | 0.01547 | -0.00879 | -188.57497            | -                | -                |
| HBpin           | 0.20389 | 0.16081  | -411.81383            | -                | -                |
| <b>11</b>       | 0.51824 | 0.45526  | -1015.16236           | -                | -                |
| <b>11-TS1</b>   | 0.53847 | 0.47151  | -1203.74205           | 0.8              | 13.5             |
| <b>11-IM1</b>   | 0.54024 | 0.47239  | -1203.80134           | -35.3            | -23.1            |
| <b>11-TS2</b>   | 0.74466 | 0.65485  | -1615.61759           | -35.7            | -10.3            |
| <b>11-IM2</b>   | 0.74567 | 0.65506  | -1615.61894           | -35.9            | -11.0            |
| <b>11-TS3</b>   | 0.74212 | 0.65278  | -1615.58207           | -15.0            | 10.7             |

**Table S15** Energies of the stationary points involved in the hydroboration of CO<sub>2</sub> with HBpin using AlH active species **12**.

| Species         | $H_c$   | $G_c$    | $E_{sol}$<br>(in THF) | $\Delta H_{sol}$ | $\Delta G_{sol}$ |
|-----------------|---------|----------|-----------------------|------------------|------------------|
| CO <sub>2</sub> | 0.01547 | -0.00879 | -188.57497            | -                | -                |
| HBpin           | 0.20389 | 0.16081  | -411.81383            | -                | -                |
| <b>12</b>       | 0.58735 | 0.50268  | -1548.46655           | -                | -                |
| <b>12-TS1</b>   | 0.60313 | 0.50901  | -1737.04134           | 1.1              | 10.4             |
| <b>12-IM1</b>   | 0.60863 | 0.51561  | -1737.11605           | -42.4            | -32.4            |
| <b>12-TS2</b>   | 0.81309 | 0.69860  | -2148.91225           | -30.2            | -6.6             |
| <b>12-IM2</b>   | 0.81450 | 0.69959  | -2148.93374           | -42.8            | -19.5            |
| <b>12-TS3</b>   | 0.81240 | 0.70064  | -2148.88928           | -16.2            | 9.1              |

**Table S16** Energies of the stationary points (optimized in benzene solvent) involved in the hydroboration of CO<sub>2</sub> with HBpin using AlH active species **3**.

| Species         | $H_c^a$ | $G_c^b$  | $E_{sol}^c$<br>(in benzene) | $\Delta H_{sol}^d$ | $\Delta G_{sol}^e$ |
|-----------------|---------|----------|-----------------------------|--------------------|--------------------|
| CO <sub>2</sub> | 0.01540 | -0.00889 | -188.57499 7                | -                  | -                  |
| HBpin           | 0.20343 | 0.16014  | -411.81385                  | -                  | -                  |
| OHCOPin         | 0.22285 | 0.17173  | -600.42256                  | -20.5              | -10.2              |
| <b>3</b>        | 0.81864 | 0.70874  | -1640.00894                 | -                  | -                  |
| <b>3-TS1</b>    | 0.83637 | 0.72165  | -1828.57497                 | 5.2                | 17.4               |
| <b>3-IM1</b>    | 0.84023 | 0.72397  | -1828.65238                 | -41.0              | -29.7              |
| <b>3-TS2</b>    | 1.04506 | 0.90677  | -2240.46262                 | -39.7              | -15.1              |
| <b>3-IM2</b>    | 1.04656 | 0.90860  | -2240.46373                 | -39.5              | -14.7              |
| <b>3-TS3</b>    | 1.04272 | 0.90771  | -2240.43439                 | -23.5              | 3.2                |

*a:*  $H_c$  is the enthalpy correction calculated at the M06-2X/6-31G\* level in benzene solvent at 298 K;

*b:*  $G_c$  is the Gibbs free energy correction calculated at the M06-2X/6-31G\* level in benzene solvent at 298 K;

*c:*  $E_{sol}$  is the electron energy in the solvent after PCM correction calculated at the M06-2X/(SMD, benzene)//6-311++G(d, p) level;

*d:*  $\Delta H_{sol}$  is the relative enthalpy energy in the solvent at 298 K  $H_{sol} = H_c + E_{sol} + RT\ln(24.5)/2625460$ .

*e:*  $\Delta G_{sol}$  is the relative Gibbs free energy in the solvent at 298 K.  $G_{sol} = G_c + E_{sol} + RT\ln(24.5)/2625460$ .

**Table S17** Energies of the stationary points (optimized in benzene solvent) involved in the hydroboration of CO<sub>2</sub> with HBpin using AIH active species **6**.

| Species         | $H_c$   | $G_c$    | $E_{sol}$<br>(in benzene) | $\Delta H_{sol}$ | $\Delta G_{sol}$ |
|-----------------|---------|----------|---------------------------|------------------|------------------|
| CO <sub>2</sub> | 0.01540 | -0.00889 | -188.57499 7              | -                | -                |
| HBpin           | 0.20343 | 0.16014  | -411.81385                | -                | -                |
| OHCOBpin        | 0.22285 | 0.17173  | -600.42256                | -20.5            | -10.2            |
| <b>6</b>        | 0.94468 | 0.82086  | -1964.89750               | -                | -                |
| <b>6-TS1</b>    | 0.96094 | 0.82920  | -2153.46169               | 5.4              | 15.7             |
| <b>6-IM1</b>    | 0.96613 | 0.83156  | -2153.54220               | -41.8            | -33.3            |
| <b>6-TS2</b>    | 1.17068 | 1.02192  | -2565.34634               | -36.9            | -10.2            |
| <b>6-IM2</b>    | 1.17310 | 1.02852  | -2565.39841               | -68.1            | -38.7            |
| <b>6-TS3</b>    | 1.17013 | 1.02277  | -2565.35978               | -45.7            | -18.1            |
| <b>6-IM3</b>    | 1.17114 | 1.02226  | -2565.37494               | -54.6            | -27.9            |

**Table S18** Energies of the stationary points (optimized in THF solvent) involved in the hydroboration of CO<sub>2</sub> with HBpin using AIH active species **12**.

| Species         | $H_c$   | $G_c$    | $E_{sol}$<br>(in THF) | $\Delta H_{sol}$ | $\Delta G_{sol}$ |
|-----------------|---------|----------|-----------------------|------------------|------------------|
| CO <sub>2</sub> | 0.01536 | -0.00894 |                       | -                | -                |
| HBpin           | 0.20313 | 0.15985  |                       | -                | -                |
| OHCOBpin        | 0.22261 | 0.17171  |                       | -21.2            | -10.7            |
| <b>12</b>       | 0.58688 | 0.50105  |                       | -                | -                |
| <b>12-TS1</b>   | 0.60316 | 0.51028  | -1737.04177           | -0.0             | 10.7             |
| <b>12-IM1</b>   | 0.60871 | 0.51453  | -1737.11674           | -43.7            | -33.7            |
| <b>12-TS2</b>   | 0.81374 | 0.70360  | -2148.91445           | -33.4            | -6.3             |
| <b>12-IM2</b>   | 0.81395 | 0.69967  | -2148.93478           | -46.1            | -21.5            |
| <b>12-TS3</b>   | 0.81291 | 0.70390  | -2148.89059           | -19.0            | 8.9              |

## S7: Cartesian coordinates of the optimized structures

|                                      |              |              |              |                            |              |              |              |
|--------------------------------------|--------------|--------------|--------------|----------------------------|--------------|--------------|--------------|
| CO <sub>2</sub> (in gas phase)       |              |              |              | HBpin (in benzene solvent) |              |              |              |
| 6                                    | 0.000000000  | 0.000000000  | 0.000000000  | 1                          | -0.000008000 | 3.121189000  | 0.000031000  |
| 8                                    | 0.000000000  | 0.000000000  | 1.162730000  | 5                          | -0.000010000 | 1.932997000  | 0.000006000  |
| 8                                    | 0.000000000  | 0.000000000  | -1.162730000 | 8                          | -1.063721000 | 1.186344000  | 0.419999000  |
| CO <sub>2</sub> (in benzene solvent) |              |              |              | 8                          | 1.063716000  | 1.186359000  | -0.419976000 |
| 6                                    | 0.000000000  | 0.000000000  | 0.000000000  | 6                          | -0.779911000 | -0.186922000 | 0.054753000  |
| 8                                    | 0.000000000  | 0.000000000  | 1.162475000  | 6                          | 0.779913000  | -0.186916000 | -0.054756000 |
| 8                                    | 0.000000000  | 0.000000000  | -1.162475000 | 6                          | 1.469923000  | -0.434603000 | 1.284131000  |
| CO <sub>2</sub> (in THF solvent)     |              |              |              | 6                          | 1.346002000  | -1.108777000 | -1.121594000 |
| 6                                    | 0.000000000  | 0.000000000  | 0.000000000  | 6                          | -1.345991000 | -1.108805000 | 1.121577000  |
| 8                                    | 0.000000000  | 0.000000000  | 1.162475000  | 6                          | -1.469925000 | -0.434587000 | -1.284137000 |
| 8                                    | 0.000000000  | 0.000000000  | -1.162475000 | 1                          | -2.535737000 | -0.212806000 | -1.179892000 |
| HBpin (in gas phase)                 |              |              |              | 1                          | -1.062707000 | 0.216408000  | -2.064508000 |
| 1                                    | 0.000007000  | 3.121341000  | -0.000034000 | 1                          | -1.362744000 | -1.475012000 | -1.605398000 |
| 5                                    | 0.000009000  | 1.933909000  | -0.000007000 | 1                          | -2.437846000 | -1.039695000 | 1.125070000  |
| 8                                    | -1.063184000 | 1.184376000  | 0.418976000  | 1                          | -0.985420000 | -0.841748000 | 2.117179000  |
| 8                                    | 1.063188000  | 1.184362000  | -0.419001000 | 1                          | -1.072736000 | -2.149236000 | 0.915258000  |
| 6                                    | -0.779689000 | -0.185497000 | 0.054626000  | 1                          | 1.062697000  | 0.216372000  | 2.064514000  |
| 6                                    | 0.779688000  | -0.185502000 | -0.054623000 | 1                          | 2.535734000  | -0.212812000 | 1.179895000  |
| 6                                    | 1.468907000  | -0.435530000 | 1.285483000  | 1                          | 1.362749000  | -1.475036000 | 1.605371000  |
| 6                                    | 1.346362000  | -1.108167000 | -1.121728000 | 1                          | 1.072749000  | -2.149213000 | -0.915297000 |
| 6                                    | -1.346371000 | -1.108137000 | 1.121748000  | 1                          | 2.437856000  | -1.039664000 | -1.125080000 |
| 6                                    | -1.468905000 | -0.435550000 | -1.285477000 | 1                          | 0.985435000  | -0.841701000 | -2.117193000 |
| 1                                    | -2.534086000 | -0.214326000 | -1.179544000 | HBpin (in THF solvent)     |              |              |              |
| 1                                    | -1.059594000 | 0.216925000  | -2.062915000 | 1                          | -0.000002000 | 3.122926000  | 0.000007000  |
| 1                                    | -1.357067000 | -1.475666000 | -1.606014000 | 5                          | -0.000002000 | 1.933869000  | 0.000001000  |
| 1                                    | -2.437274000 | -1.034483000 | 1.126066000  | 8                          | 1.064933000  | 1.189605000  | -0.418739000 |
| 1                                    | -0.982336000 | -0.839327000 | 2.115059000  | 8                          | -1.064934000 | 1.189601000  | 0.418744000  |
| 1                                    | -1.073219000 | -2.148354000 | 0.913964000  | 6                          | 0.779727000  | -0.186724000 | -0.055116000 |
| 1                                    | 1.059601000  | 0.216964000  | 2.062909000  | 6                          | -0.779726000 | -0.186726000 | 0.055115000  |
| 1                                    | 2.534088000  | -0.214313000 | 1.179543000  | 6                          | -1.470552000 | -0.437980000 | -1.282179000 |
| 1                                    | 1.357065000  | -1.475638000 | 1.606042000  | 6                          | -1.342343000 | -1.107861000 | 1.123850000  |
| 1                                    | 1.073199000  | -2.148378000 | -0.913926000 | 6                          | 1.342346000  | -1.107855000 | -1.123854000 |
| 1                                    | 2.437266000  | -1.034525000 | -1.126048000 | 6                          | 1.470552000  | -0.437984000 | 1.282178000  |
| 1                                    | 0.982330000  | -0.839370000 | -2.1150440   | 1                          | 2.537748000  | -0.222926000 | 1.176012000  |
|                                      |              |              |              | 1                          | 1.066983000  | 0.213062000  | 2.064589000  |
|                                      |              |              |              | 1                          | 1.357370000  | -1.478725000 | 1.599913000  |

|                              |              |              |              |                                                        |              |              |              |
|------------------------------|--------------|--------------|--------------|--------------------------------------------------------|--------------|--------------|--------------|
| 1                            | 2.434703000  | -1.043923000 | -1.126251000 | 8                                                      | -0.483844000 | 0.866387000  | -0.040920000 |
| 1                            | 0.980932000  | -0.838627000 | -2.118758000 | 6                                                      | 1.264272000  | -0.691001000 | 0.153283000  |
| 1                            | 1.063292000  | -2.146428000 | -0.916717000 | 6                                                      | 0.965879000  | 0.827422000  | -0.086368000 |
| 1                            | -1.066985000 | 0.213070000  | -2.064587000 | 6                                                      | 1.514200000  | 1.760413000  | 0.978853000  |
| 1                            | -2.537748000 | -0.222925000 | -1.176011000 | 6                                                      | 1.376930000  | 1.299127000  | -1.478142000 |
| 1                            | -1.357369000 | -1.478719000 | -1.599919000 | 6                                                      | 1.296316000  | -1.060978000 | 1.633502000  |
| 1                            | -1.063287000 | -2.146433000 | 0.916709000  | 6                                                      | 2.497647000  | -1.218264000 | -0.557948000 |
| 1                            | -2.434701000 | -1.043931000 | 1.126248000  | 1                                                      | 2.622698000  | -2.282235000 | -0.336986000 |
| 1                            | -0.980929000 | -0.838638000 | 2.118754000  | 1                                                      | 2.417507000  | -1.102148000 | -1.640772000 |
| OHCOPin (in gas phase)       |              |              |              |                                                        |              |              |              |
| 5                            | -0.897412000 | -0.427223000 | -0.317653000 | 1                                                      | 1.293013000  | -2.150478000 | 1.726427000  |
| 8                            | 0.111322000  | -1.343183000 | -0.379551000 | 1                                                      | 0.417525000  | -0.670721000 | 2.157353000  |
| 8                            | -0.498579000 | 0.840051000  | -0.017326000 | 1                                                      | 2.194719000  | -0.674182000 | 2.123458000  |
| 6                            | 1.281950000  | -0.679292000 | 0.150446000  | 1                                                      | 1.099006000  | 1.533335000  | 1.962760000  |
| 6                            | 0.946234000  | 0.830514000  | -0.093240000 | 1                                                      | 1.255284000  | 2.793705000  | 0.730414000  |
| 6                            | 1.497948000  | 1.784414000  | 0.952773000  | 1                                                      | 2.605768000  | 1.685492000  | 1.028801000  |
| 6                            | 1.318818000  | 1.300098000  | -1.497579000 | 1                                                      | 2.464966000  | 1.361955000  | -1.573260000 |
| 6                            | 1.357651000  | -1.034931000 | 1.633489000  | 1                                                      | 0.956477000  | 2.293026000  | -1.654516000 |
| 6                            | 2.511111000  | -1.186859000 | -0.584447000 | 1                                                      | 0.997668000  | 0.625209000  | -2.253407000 |
| 1                            | 2.662410000  | -2.245240000 | -0.355797000 | 8                                                      | -3.260257000 | 0.569796000  | 0.821107000  |
| 1                            | 2.399931000  | -1.083198000 | -1.665331000 | 6                                                      | -3.275345000 | -0.134449000 | -0.146766000 |
| 1                            | 3.401933000  | -0.635621000 | -0.265073000 | 8                                                      | -2.204346000 | -0.742025000 | -0.689060000 |
| 1                            | 1.379809000  | -2.123129000 | 1.733764000  | 1                                                      | -4.182421000 | -0.401918000 | -0.705820000 |
| 1                            | 0.482225000  | -0.657754000 | 2.171461000  | HCHO (in gas phase)                                    |              |              |              |
| 1                            | 2.257986000  | -0.621798000 | 2.097526000  | 6                                                      | -0.000006000 | 0.527264000  | 0.000000000  |
| 1                            | 1.105047000  | 1.556082000  | 1.944999000  | 1                                                      | 0.937713000  | 1.115042000  | 0.000000000  |
| 1                            | 1.211544000  | 2.808701000  | 0.699805000  | 1                                                      | -0.937632000 | 1.115205000  | 0.000000000  |
| 1                            | 2.591477000  | 1.729602000  | 0.981201000  | 8                                                      | -0.000006000 | -0.674229000 | 0.000000000  |
| 1                            | 2.403090000  | 1.383924000  | -1.615835000 | [(BpinO) <sub>2</sub> CH <sub>2</sub> ] (in gas phase) |              |              |              |
| 1                            | 0.870876000  | 2.282006000  | -1.670369000 | 1                                                      | -0.192758000 | 2.242320000  | 1.295205000  |
| 1                            | 0.936942000  | 0.609720000  | -2.256400000 | 5                                                      | 1.926071000  | 1.286189000  | 0.003717000  |
| 8                            | -3.274754000 | 0.617317000  | 0.767411000  | 1                                                      | -0.134866000 | 3.780576000  | 0.362790000  |
| 6                            | -3.275873000 | -0.155628000 | -0.143685000 | 6                                                      | 0.044225000  | 2.704655000  | 0.331352000  |
| 8                            | -2.196873000 | -0.808334000 | -0.622926000 | 8                                                      | 1.402861000  | 2.539207000  | 0.027904000  |
| 1                            | -4.172182000 | -0.463876000 | -0.699089000 | 8                                                      | -0.750072000 | 2.153298000  | -0.683413000 |
| OHCOPin (in benzene solvent) |              |              |              |                                                        |              |              |              |
| 5                            | -0.899335000 | -0.390227000 | -0.356623000 | 8                                                      | 3.266461000  | 1.072455000  | -0.186557000 |
| 8                            | 0.088685000  | -1.326932000 | -0.409599000 | 8                                                      | 1.205565000  | 0.124659000  | 0.204645000  |



|   |              |              |              |                                        |              |              |              |
|---|--------------|--------------|--------------|----------------------------------------|--------------|--------------|--------------|
| 6 | 3.435660000  | -0.350402000 | -0.323940000 | [(Bpin) <sub>2</sub> O] (in gas phase) |              |              |              |
| 6 | 2.191467000  | -0.906617000 | 0.441923000  | 5                                      | -1.221991000 | -0.742291000 | -0.182403000 |
| 6 | 3.394178000  | -0.668865000 | -1.817494000 | 8                                      | -1.461712000 | 0.291589000  | 0.688917000  |
| 6 | 4.776595000  | -0.748102000 | 0.271052000  | 8                                      | -2.337617000 | -1.154252000 | -0.863717000 |
| 6 | 1.680315000  | -2.239644000 | -0.077187000 | 6                                      | -2.784029000 | 0.776829000  | 0.383959000  |
| 6 | 2.408189000  | -0.972028000 | 1.952600000  | 6                                      | -3.458326000 | -0.484053000 | -0.253138000 |
| 1 | 2.419421000  | -0.411163000 | -2.243595000 | 6                                      | -3.437501000 | 1.273405000  | 1.663178000  |
| 1 | 4.157477000  | -0.072452000 | -2.323732000 | 6                                      | -2.617707000 | 1.923238000  | -0.611961000 |
| 1 | 3.592876000  | -1.727631000 | -2.008996000 | 6                                      | -4.495178000 | -0.180551000 | -1.322285000 |
| 1 | 4.880625000  | -0.381744000 | 1.294138000  | 6                                      | -4.033314000 | -1.436039000 | 0.793905000  |
| 1 | 5.583529000  | -0.318650000 | -0.328898000 | 1                                      | -3.417504000 | 0.508797000  | 2.442070000  |
| 1 | 4.890638000  | -1.837515000 | 0.270217000  | 1                                      | -2.899182000 | 2.151099000  | 2.031362000  |
| 1 | 3.086491000  | -1.785656000 | 2.226281000  | 1                                      | -4.477494000 | 1.561781000  | 1.476142000  |
| 1 | 2.822042000  | -0.030978000 | 2.328679000  | 1                                      | -1.950469000 | 2.671125000  | -0.176023000 |
| 1 | 1.344468000  | -2.162927000 | -1.113450000 | 1                                      | -3.576431000 | 2.396692000  | -0.844005000 |
| 1 | 0.840496000  | -2.582045000 | 0.535129000  | 1                                      | -2.167294000 | 1.566996000  | -1.543792000 |
| 1 | 2.471254000  | -2.995350000 | -0.018112000 | 1                                      | -5.316497000 | 0.410995000  | -0.903640000 |
| 1 | 1.442425000  | -1.140550000 | 2.436923000  | 1                                      | -4.908246000 | -1.116888000 | -1.707400000 |
| 5 | -1.592061000 | 1.124201000  | -0.399410000 | 1                                      | -4.055107000 | 0.367303000  | -2.157642000 |
| 8 | -2.331282000 | 0.507294000  | -1.376815000 | 1                                      | -4.289587000 | -2.380485000 | 0.306952000  |
| 8 | -1.830657000 | 0.634750000  | 0.864528000  | 1                                      | -4.934418000 | -1.024718000 | 1.258592000  |
| 6 | -2.894090000 | -0.668592000 | -0.764569000 | 1                                      | -3.298098000 | -1.643116000 | 1.577856000  |
| 6 | -2.950006000 | -0.264859000 | 0.747244000  | 5                                      | 1.209134000  | -0.749835000 | -0.189865000 |
| 6 | -4.206210000 | 0.530067000  | 1.097617000  | 8                                      | -0.008553000 | -1.338535000 | -0.343962000 |
| 6 | -4.243664000 | -0.962344000 | -1.397792000 | 8                                      | 2.350311000  | -1.480249000 | 0.018061000  |
| 6 | -1.911768000 | -1.808046000 | -1.023919000 | 8                                      | 1.429618000  | 0.604092000  | -0.265075000 |
| 1 | -1.766763000 | -1.908630000 | -2.103038000 | 6                                      | 3.385961000  | -0.531521000 | 0.340582000  |
| 1 | -0.944829000 | -1.575295000 | -0.567984000 | 6                                      | 2.858992000  | 0.779181000  | -0.333914000 |
| 1 | -2.276131000 | -2.760652000 | -0.627157000 | 6                                      | 3.437536000  | -0.427991000 | 1.863980000  |
| 1 | -4.901546000 | -0.092351000 | -1.353103000 | 6                                      | 4.710886000  | -1.040466000 | -0.202960000 |
| 1 | -4.731164000 | -1.802551000 | -0.891525000 | 6                                      | 3.235319000  | 2.063629000  | 0.386449000  |
| 1 | -4.102769000 | -1.230060000 | -2.448530000 | 6                                      | 3.227913000  | 0.868721000  | -1.813658000 |
| 1 | -5.096764000 | -0.105582000 | 1.097092000  | 1                                      | 2.492535000  | -0.043254000 | 2.260418000  |
| 1 | -4.359401000 | 1.347766000  | 0.386358000  | 1                                      | 3.602070000  | -1.426101000 | 2.278196000  |
| 1 | -4.084433000 | 0.960241000  | 2.095296000  | 1                                      | 4.248829000  | 0.227319000  | 2.194741000  |
| 6 | -2.755663000 | -1.414979000 | 1.722259000  | 1                                      | 4.641023000  | -1.270627000 | -1.267711000 |
| 1 | -2.819170000 | -1.040889000 | 2.747967000  | 1                                      | 4.995877000  | -1.954180000 | 0.325787000  |
| 1 | -3.532854000 | -2.174429000 | 1.584770000  | 1                                      | 5.499652000  | -0.295662000 | -0.051687000 |
| 1 | -1.776718000 | -1.880521000 | 1.588529000  | 1                                      | 4.294791000  | 1.069183000  | -1.950166000 |

|                               |              |              |              |    |              |              |              |
|-------------------------------|--------------|--------------|--------------|----|--------------|--------------|--------------|
| 1                             | 2.976870000  | -0.060297000 | -2.335265000 | 14 | -1.572031000 | -1.351628000 | 0.961577000  |
| 1                             | 2.834771000  | 2.080487000  | 1.401684000  | 14 | -3.080288000 | 0.775666000  | -0.668173000 |
| 1                             | 2.826492000  | 2.920389000  | -0.156340000 | 14 | 2.046310000  | 1.547884000  | 0.737481000  |
| 1                             | 4.324165000  | 2.173737000  | 0.431931000  | 14 | 2.635023000  | -1.040024000 | -0.817141000 |
| 1                             | 2.657849000  | 1.682610000  | -2.269351000 | 6  | -2.695621000 | 2.271937000  | -1.752742000 |
|                               |              |              |              | 1  | -3.623856000 | 2.831557000  | -1.917466000 |
|                               |              |              |              | 1  | -1.986865000 | 2.961909000  | -1.278004000 |
|                               |              |              |              | 1  | -2.293071000 | 1.998471000  | -2.731409000 |
|                               |              |              |              | 6  | -4.176888000 | -0.380813000 | -1.672629000 |
|                               |              |              |              | 1  | -4.428700000 | -1.295980000 | -1.126632000 |
|                               |              |              |              | 1  | -5.116035000 | 0.108625000  | -1.953886000 |
|                               |              |              |              | 1  | -3.663237000 | -0.676396000 | -2.594304000 |
|                               |              |              |              | 6  | -4.028515000 | 1.439552000  | 0.822320000  |
|                               |              |              |              | 1  | -4.678422000 | 2.262291000  | 0.503413000  |
|                               |              |              |              | 1  | -4.660204000 | 0.687285000  | 1.301198000  |
|                               |              |              |              | 1  | -3.339721000 | 1.835414000  | 1.577301000  |
|                               |              |              |              | 6  | -1.157909000 | -2.943675000 | 0.038030000  |
|                               |              |              |              | 1  | -0.178418000 | -2.891013000 | -0.451906000 |
|                               |              |              |              | 1  | -1.137074000 | -3.807550000 | 0.712059000  |
|                               |              |              |              | 1  | -1.905084000 | -3.138840000 | -0.739731000 |
|                               |              |              |              | 6  | -3.230335000 | -1.613521000 | 1.818980000  |
|                               |              |              |              | 1  | -3.448332000 | -0.814162000 | 2.533469000  |
|                               |              |              |              | 1  | -4.078613000 | -1.699633000 | 1.133051000  |
|                               |              |              |              | 1  | -3.169869000 | -2.551458000 | 2.383687000  |
|                               |              |              |              | 6  | -0.300848000 | -1.091637000 | 2.323037000  |
|                               |              |              |              | 1  | -0.524551000 | -0.192407000 | 2.908399000  |
|                               |              |              |              | 1  | -0.301931000 | -1.946271000 | 3.009763000  |
|                               |              |              |              | 1  | 0.705040000  | -0.987229000 | 1.907813000  |
|                               |              |              |              | 6  | 0.485832000  | 2.503020000  | 1.212964000  |
|                               |              |              |              | 1  | 0.018144000  | 2.983106000  | 0.340899000  |
|                               |              |              |              | 1  | -0.268709000 | 1.865231000  | 1.684411000  |
|                               |              |              |              | 1  | 0.736718000  | 3.309578000  | 1.910966000  |
|                               |              |              |              | 6  | 3.176204000  | 2.765812000  | -0.152611000 |
|                               |              |              |              | 1  | 3.330255000  | 3.663910000  | 0.456693000  |
|                               |              |              |              | 1  | 4.159829000  | 2.338514000  | -0.369583000 |
|                               |              |              |              | 1  | 2.731738000  | 3.077787000  | -1.104390000 |
|                               |              |              |              | 6  | 2.934706000  | 0.945173000  | 2.283797000  |
|                               |              |              |              | 1  | 3.243511000  | 1.799525000  | 2.896738000  |
|                               |              |              |              | 1  | 2.300790000  | 0.299219000  | 2.898775000  |
|                               |              |              |              | 1  | 3.841142000  | 0.384147000  | 2.028116000  |
| <b>MeOBpin (in gas phase)</b> |              |              |              |    |              |              |              |
| 5                             | -1.171771000 | -0.412281000 | -0.121886000 |    |              |              |              |
| 8                             | -0.710401000 | 0.807738000  | 0.326505000  |    |              |              |              |
| 8                             | -0.167825000 | -1.278521000 | -0.480567000 |    |              |              |              |
| 6                             | 0.701461000  | 0.835446000  | 0.034639000  |    |              |              |              |
| 6                             | 1.059161000  | -0.688034000 | -0.013296000 |    |              |              |              |
| 6                             | 2.179507000  | -1.048457000 | -0.975496000 |    |              |              |              |
| 6                             | 1.339734000  | -1.267932000 | 1.372269000  |    |              |              |              |
| 6                             | 0.865235000  | 1.519263000  | -1.321559000 |    |              |              |              |
| 6                             | 1.416508000  | 1.625770000  | 1.118283000  |    |              |              |              |
| 1                             | 1.106767000  | 2.673608000  | 1.072704000  |    |              |              |              |
| 1                             | 1.178148000  | 1.242115000  | 2.112083000  |    |              |              |              |
| 1                             | 2.501225000  | 1.582314000  | 0.972699000  |    |              |              |              |
| 1                             | 0.402147000  | 2.508524000  | -1.275609000 |    |              |              |              |
| 1                             | 0.369859000  | 0.943353000  | -2.109657000 |    |              |              |              |
| 1                             | 1.920036000  | 1.638491000  | -1.586412000 |    |              |              |              |
| 1                             | 1.921761000  | -0.781198000 | -2.002019000 |    |              |              |              |
| 1                             | 2.359381000  | -2.126385000 | -0.938713000 |    |              |              |              |
| 1                             | 3.106464000  | -0.535659000 | -0.696804000 |    |              |              |              |
| 1                             | 2.298030000  | -0.918986000 | 1.768608000  |    |              |              |              |
| 1                             | 1.367175000  | -2.358015000 | 1.296844000  |    |              |              |              |
| 1                             | 0.548565000  | -0.993467000 | 2.077289000  |    |              |              |              |
| 8                             | -2.481401000 | -0.738743000 | -0.204511000 |    |              |              |              |
| 6                             | -3.437316000 | 0.249862000  | 0.137265000  |    |              |              |              |
| 1                             | -3.375899000 | 1.107298000  | -0.540282000 |    |              |              |              |
| 1                             | -4.425045000 | -0.205985000 | 0.053370000  |    |              |              |              |
| 1                             | -3.288480000 | 0.606099000  | 1.161283000  |    |              |              |              |
| <b>I (in gas phase)</b>       |              |              |              |    |              |              |              |
| 7                             | -1.589779000 | -0.022233000 | -0.188212000 |    |              |              |              |
| 13                            | -0.071938000 | 0.385015000  | -1.083093000 |    |              |              |              |
| 1                             | -0.165457000 | 0.876938000  | -2.577072000 |    |              |              |              |
| 7                             | 1.559697000  | 0.234200000  | -0.307336000 |    |              |              |              |

|                             |              |              |              |                             |              |              |              |
|-----------------------------|--------------|--------------|--------------|-----------------------------|--------------|--------------|--------------|
| 6                           | 4.368222000  | -0.403488000 | -1.187476000 | 1                           | 4.365571000  | -0.867535000 | 1.666020000  |
| 1                           | 4.859040000  | -0.004310000 | -0.292658000 | 1                           | 3.576667000  | -0.941803000 | 3.243379000  |
| 1                           | 4.995268000  | -1.217849000 | -1.567756000 | 6                           | 0.586123000  | -0.021573000 | 2.733917000  |
| 1                           | 4.347633000  | 0.389199000  | -1.942466000 | 1                           | 0.255940000  | -1.066380000 | 2.717700000  |
| 6                           | 2.784629000  | -2.385383000 | 0.493898000  | 1                           | 0.830176000  | 0.233156000  | 3.771482000  |
| 1                           | 3.479511000  | -3.167939000 | 0.168140000  | 1                           | -0.269955000 | 0.597556000  | 2.439700000  |
| 1                           | 3.163869000  | -1.974408000 | 1.436428000  | 6                           | -0.049829000 | -2.823339000 | 0.047160000  |
| 1                           | 1.821298000  | -2.859903000 | 0.708679000  | 1                           | 0.447017000  | -2.735401000 | -0.925850000 |
| 6                           | 1.936701000  | -1.791973000 | -2.403751000 | 1                           | 0.636854000  | -2.432980000 | 0.802412000  |
| 1                           | 0.900621000  | -2.144111000 | -2.308040000 | 1                           | -0.202885000 | -3.892474000 | 0.237872000  |
| 1                           | 1.964067000  | -1.067909000 | -3.225443000 | 6                           | -2.689648000 | -2.855065000 | -1.341710000 |
| 1                           | 2.532177000  | -2.660875000 | -2.705507000 | 1                           | -2.542436000 | -3.938439000 | -1.261823000 |
|                             |              |              |              | 1                           | -3.765264000 | -2.665153000 | -1.323547000 |
|                             |              |              |              | 1                           | -2.309712000 | -2.540675000 | -2.320459000 |
| <b>1-TSI (in gas phase)</b> |              |              |              |                             |              |              |              |
| 7                           | 1.626554000  | -0.007010000 | -0.036067000 | 6                           | -2.564960000 | -2.334453000 | 1.694994000  |
| 13                          | -0.020741000 | 0.558532000  | -0.520566000 | 1                           | -2.604402000 | -3.413970000 | 1.879716000  |
| 1                           | 0.032197000  | 1.635763000  | -1.767549000 | 1                           | -2.000765000 | -1.873232000 | 2.512954000  |
| 7                           | -1.609437000 | -0.255841000 | -0.246003000 | 1                           | -3.590680000 | -1.954695000 | 1.746392000  |
| 14                          | 2.101110000  | 0.214446000  | 1.632838000  | 6                           | -4.620976000 | -0.186195000 | -0.575002000 |
| 14                          | 2.725827000  | -0.533297000 | -1.289421000 | 1                           | -4.815538000 | -1.083208000 | 0.019581000  |
| 14                          | -1.737308000 | -1.986425000 | 0.036146000  | 1                           | -5.472737000 | 0.489779000  | -0.434798000 |
| 14                          | -3.052778000 | 0.737540000  | -0.084285000 | 1                           | -4.597755000 | -0.476167000 | -1.630537000 |
| 6                           | 1.763528000  | -0.624194000 | -2.914839000 | 6                           | -3.238277000 | 1.336812000  | 1.691681000  |
| 1                           | 2.374394000  | -1.117074000 | -3.679415000 | 1                           | -4.157346000 | 1.920396000  | 1.817916000  |
| 1                           | 0.837273000  | -1.209062000 | -2.826656000 | 1                           | -3.271459000 | 0.497986000  | 2.395001000  |
| 1                           | 1.496443000  | 0.366973000  | -3.294472000 | 1                           | -2.395101000 | 1.976508000  | 1.975574000  |
| 6                           | 4.142177000  | 0.692323000  | -1.492882000 | 6                           | -2.995654000 | 2.257164000  | -1.212843000 |
| 1                           | 4.756117000  | 0.741389000  | -0.585732000 | 1                           | -2.538619000 | 3.134580000  | -0.743254000 |
| 1                           | 4.801040000  | 0.407134000  | -2.320558000 | 1                           | -2.480890000 | 2.063866000  | -2.159660000 |
| 1                           | 3.761948000  | 1.700250000  | -1.692856000 | 1                           | -4.025540000 | 2.543236000  | -1.455247000 |
| 6                           | 3.481032000  | -2.234534000 | -0.982554000 | 6                           | -0.016639000 | 3.023985000  | -0.570669000 |
| 1                           | 3.917067000  | -2.605227000 | -1.917815000 | 8                           | 0.115822000  | 3.966732000  | -1.228524000 |
| 1                           | 4.281651000  | -2.206160000 | -0.238163000 | 8                           | -0.177079000 | 2.358383000  | 0.428971000  |
| 1                           | 2.737444000  | -2.964162000 | -0.648094000 |                             |              |              |              |
| 6                           | 2.811015000  | 1.935419000  | 1.932722000  | <b>1-IMI (in gas phase)</b> |              |              |              |
| 1                           | 2.050440000  | 2.712526000  | 1.807060000  | 7                           | -1.636732000 | -0.041530000 | 0.009876000  |
| 1                           | 3.207405000  | 2.020930000  | 2.950887000  | 13                          | 0.020917000  | -0.627542000 | -0.381539000 |
| 1                           | 3.629114000  | 2.149995000  | 1.236481000  | 1                           | -0.111225000 | -3.830390000 | -1.370995000 |
| 6                           | 3.404869000  | -1.035721000 | 2.164940000  | 7                           | 1.609248000  | 0.194629000  | -0.185792000 |
| 1                           | 3.093708000  | -2.065583000 | 1.961243000  | 14                          | -2.219910000 | -0.444128000 | 1.606844000  |

|    |              |              |              |    |                             |              |              |
|----|--------------|--------------|--------------|----|-----------------------------|--------------|--------------|
| 14 | -2.617869000 | 0.618322000  | -1.274387000 | 1  | 4.803610000                 | 1.019445000  | 0.182533000  |
| 14 | 1.743236000  | 1.896527000  | 0.238488000  | 1  | 5.480215000                 | -0.514213000 | -0.367875000 |
| 14 | 3.056922000  | -0.807926000 | -0.094989000 | 1  | 4.624106000                 | 0.528625000  | -1.510090000 |
| 6  | -1.502411000 | 0.872451000  | -2.779821000 | 6  | 3.204080000                 | -1.572126000 | 1.619127000  |
| 1  | -2.017997000 | 1.480430000  | -3.531475000 | 1  | 4.119341000                 | -2.167359000 | 1.713790000  |
| 1  | -0.569810000 | 1.398606000  | -2.533596000 | 1  | 3.216479000                 | -0.804864000 | 2.400347000  |
| 1  | -1.235198000 | -0.078675000 | -3.251107000 | 1  | 2.352246000                 | -2.234209000 | 1.811891000  |
| 6  | -3.998094000 | -0.576807000 | -1.740970000 | 6  | 3.036975000                 | -2.212327000 | -1.362461000 |
| 1  | -4.696708000 | -0.718202000 | -0.907806000 | 1  | 2.521795000                 | -3.103999000 | -0.991889000 |
| 1  | -4.575771000 | -0.208551000 | -2.596084000 | 1  | 2.585715000                 | -1.913933000 | -2.313640000 |
| 1  | -3.588453000 | -1.558208000 | -2.004262000 | 1  | 4.072601000                 | -2.507921000 | -1.565121000 |
| 6  | -3.421347000 | 2.269655000  | -0.843074000 | 6  | -0.028613000                | -2.787616000 | -1.051339000 |
| 1  | -3.795427000 | 2.739365000  | -1.760462000 | 8  | 0.147457000                 | -2.488998000 | 0.167282000  |
| 1  | -4.273567000 | 2.148154000  | -0.168092000 | 8  | -0.111199000                | -1.841172000 | -1.887065000 |
| 1  | -2.718625000 | 2.964124000  | -0.373258000 |    |                             |              |              |
| 6  | -2.980455000 | -2.166711000 | 1.658069000  |    | <b>1-TS2 (in gas phase)</b> |              |              |
| 1  | -2.231401000 | -2.925285000 | 1.408175000  | 7  | 0.205254000                 | 1.594250000  | 0.148411000  |
| 1  | -3.374649000 | -2.397436000 | 2.654199000  | 13 | 0.829599000                 | -0.015385000 | 0.637398000  |
| 1  | -3.804541000 | -2.257001000 | 0.941986000  | 1  | -0.740351000                | -0.994088000 | 3.856521000  |
| 6  | -3.508591000 | 0.787094000  | 2.212910000  | 7  | 2.287641000                 | -0.862607000 | 0.015553000  |
| 1  | -3.157982000 | 1.820817000  | 2.126422000  | 14 | -0.336101000                | 2.765172000  | 1.339239000  |
| 1  | -4.448101000 | 0.701410000  | 1.655924000  | 14 | 0.003431000                 | 1.943541000  | -1.564323000 |
| 1  | -3.735515000 | 0.593015000  | 3.267371000  | 14 | 3.702849000                 | 0.070173000  | -0.448354000 |
| 6  | -0.743379000 | -0.402883000 | 2.783859000  | 14 | 2.389581000                 | -2.616306000 | 0.107271000  |
| 1  | -0.315952000 | 0.604657000  | 2.844977000  | 6  | 0.050166000                 | 0.341794000  | -2.566404000 |
| 1  | -1.050232000 | -0.694807000 | 3.794503000  | 1  | 0.197039000                 | 0.584520000  | -3.625554000 |
| 1  | 0.059157000  | -1.089196000 | 2.484298000  | 1  | 0.856345000                 | -0.341129000 | -2.274027000 |
| 6  | 0.063370000  | 2.738570000  | 0.362013000  | 1  | -0.901598000                | -0.191244000 | -2.478665000 |
| 1  | -0.446482000 | 2.768700000  | -0.606807000 | 6  | -1.644521000                | 2.782234000  | -1.927471000 |
| 1  | -0.616803000 | 2.269899000  | 1.078119000  | 1  | -1.714300000                | 3.796379000  | -1.520973000 |
| 1  | 0.231301000  | 3.776712000  | 0.673839000  | 1  | -1.782671000                | 2.853320000  | -3.013211000 |
| 6  | 2.678633000  | 2.873529000  | -1.075488000 | 1  | -2.459419000                | 2.184423000  | -1.510402000 |
| 1  | 2.549638000  | 3.947086000  | -0.895130000 | 6  | 1.360240000                 | 3.080521000  | -2.222418000 |
| 1  | 3.751159000  | 2.667865000  | -1.100325000 | 1  | 2.358905000                 | 2.640607000  | -2.143500000 |
| 1  | 2.271266000  | 2.653294000  | -2.068788000 | 1  | 1.173866000                 | 3.291410000  | -3.282525000 |
| 6  | 2.580652000  | 2.099265000  | 1.917193000  | 1  | 1.378723000                 | 4.038865000  | -1.693606000 |
| 1  | 2.647620000  | 3.160861000  | 2.181002000  | 6  | -2.199497000                | 2.710208000  | 1.589052000  |
| 1  | 1.995366000  | 1.597302000  | 2.696029000  | 1  | -2.496725000                | 3.363654000  | 2.417628000  |
| 1  | 3.593767000  | 1.686488000  | 1.949832000  | 1  | -2.740192000                | 3.029165000  | 0.692661000  |
| 6  | 4.626873000  | 0.165567000  | -0.477038000 | 1  | -2.516104000                | 1.687067000  | 1.817714000  |



|   |              |              |              |    |                             |              |              |
|---|--------------|--------------|--------------|----|-----------------------------|--------------|--------------|
| 1 | -0.737226000 | 1.941982000  | 3.532976000  | 8  | -2.783875000                | 0.201298000  | 0.011352000  |
| 1 | -1.323593000 | 3.520306000  | 3.015468000  | 8  | -2.565339000                | -2.103654000 | -0.018272000 |
| 1 | -1.759760000 | 2.081019000  | 2.082928000  | 6  | -3.881577000                | -0.324047000 | -0.756668000 |
| 6 | 0.745810000  | 4.599650000  | 1.115706000  | 6  | -3.948993000                | -1.806632000 | -0.266400000 |
| 1 | 1.631244000  | 4.787232000  | 0.500082000  | 6  | -4.717118000                | -1.949858000 | 1.049454000  |
| 1 | -0.125524000 | 4.998316000  | 0.586773000  | 6  | -4.482487000                | -2.795559000 | -1.291353000 |
| 1 | 0.856132000  | 5.173341000  | 2.043545000  | 6  | -5.121879000                | 0.505228000  | -0.458337000 |
| 6 | 2.131966000  | 2.320378000  | 2.532686000  | 6  | -3.526848000                | -0.225247000 | -2.239484000 |
| 1 | 3.034249000  | 2.579592000  | 1.967846000  | 1  | -3.246162000                | 0.806592000  | -2.472417000 |
| 1 | 2.163283000  | 2.879276000  | 3.475385000  | 1  | -2.681595000                | -0.876302000 | -2.481751000 |
| 1 | 2.183825000  | 1.254987000  | 2.782282000  | 1  | -4.374854000                | -0.507749000 | -2.871580000 |
| 6 | 3.458107000  | 1.336310000  | -1.292532000 | 1  | -4.988940000                | 1.518207000  | -0.850697000 |
| 1 | 2.714366000  | 1.668293000  | -2.022123000 | 1  | -5.299920000                | 0.575792000  | 0.616476000  |
| 1 | 3.273183000  | 1.878995000  | -0.360661000 | 1  | -6.004444000                | 0.066701000  | -0.937037000 |
| 1 | 4.443215000  | 1.632326000  | -1.672968000 | 1  | -4.381189000                | -1.213698000 | 1.785114000  |
| 6 | 3.528951000  | -1.256699000 | -2.822123000 | 1  | -4.531072000                | -2.948457000 | 1.454372000  |
| 1 | 4.286180000  | -0.725015000 | -3.410057000 | 1  | -5.794456000                | -1.828807000 | 0.898419000  |
| 1 | 3.783876000  | -2.319541000 | -2.835105000 | 1  | -5.503890000                | -2.532357000 | -1.587513000 |
| 1 | 2.566805000  | -1.138726000 | -3.332923000 | 1  | -4.500221000                | -3.798541000 | -0.855508000 |
| 6 | 5.028602000  | -0.966958000 | -0.145870000 | 1  | -3.851295000                | -2.822522000 | -2.181551000 |
| 1 | 5.898877000  | -0.592483000 | -0.697046000 |    |                             |              |              |
| 1 | 5.027817000  | -0.489362000 | 0.840613000  |    | <b>1-TS3 (in gas phase)</b> |              |              |
| 1 | 5.172166000  | -2.041373000 | 0.003630000  | 7  | 0.713442000                 | 1.683184000  | 0.083218000  |
| 6 | 2.901903000  | -3.936038000 | -0.761624000 | 13 | 0.535049000                 | -0.140556000 | -0.010721000 |
| 1 | 3.955527000  | -3.703293000 | -0.940129000 | 1  | -0.710609000                | -0.901098000 | 3.623793000  |
| 1 | 2.857583000  | -4.943042000 | -0.330558000 | 7  | 1.959963000                 | -1.234840000 | -0.358371000 |
| 1 | 2.392478000  | -3.967521000 | -1.730468000 | 14 | 1.221985000                 | 2.370482000  | 1.600880000  |
| 6 | 2.886438000  | -2.813694000 | 2.098253000  | 14 | 0.054211000                 | 2.639465000  | -1.214381000 |
| 1 | 2.830111000  | -3.822060000 | 2.523953000  | 14 | 3.451693000                 | -0.718258000 | -1.109464000 |
| 1 | 3.942286000  | -2.532918000 | 2.036907000  | 14 | 1.826666000                 | -2.876703000 | 0.228938000  |
| 1 | 2.399833000  | -2.123585000 | 2.796223000  | 6  | -0.144440000                | 1.546210000  | -2.748317000 |
| 6 | 0.293016000  | -3.424118000 | 0.620640000  | 1  | -0.783063000                | 2.047675000  | -3.485704000 |
| 1 | -0.279092000 | -2.985648000 | 1.444059000  | 1  | 0.828326000                 | 1.381608000  | -3.226549000 |
| 1 | -0.315407000 | -3.317384000 | -0.282861000 | 1  | -0.586015000                | 0.566098000  | -2.547167000 |
| 1 | 0.374283000  | -4.496306000 | 0.837255000  | 6  | -1.602174000                | 3.382866000  | -0.691730000 |
| 6 | -0.764921000 | -0.665708000 | 2.605093000  | 1  | -1.438590000                | 4.148285000  | 0.077665000  |
| 8 | 0.364583000  | -0.370091000 | 2.131275000  | 1  | -2.128200000                | 3.863524000  | -1.525279000 |
| 8 | -1.818695000 | -0.876186000 | 1.954700000  | 1  | -2.252600000                | 2.617687000  | -0.254232000 |
| 1 | -0.778414000 | -0.840519000 | -0.081729000 | 6  | 1.153067000                 | 4.065577000  | -1.789274000 |
| 5 | -1.981765000 | -0.892634000 | 0.388841000  | 1  | 0.834870000                 | 4.368094000  | -2.794504000 |

|   |              |              |              |    |                             |              |              |
|---|--------------|--------------|--------------|----|-----------------------------|--------------|--------------|
| 1 | 1.088979000  | 4.947083000  | -1.146035000 | 8  | -1.997003000                | -0.885626000 | 2.113785000  |
| 1 | 2.204575000  | 3.766306000  | -1.850983000 | 1  | -0.888763000                | -0.678014000 | -0.508686000 |
| 6 | -0.194704000 | 2.349873000  | 2.877661000  | 5  | -2.709047000                | -0.781165000 | 0.886730000  |
| 1 | -0.349040000 | 3.344161000  | 3.310692000  | 8  | -3.221483000                | 0.402619000  | 0.472396000  |
| 1 | -1.139758000 | 2.052740000  | 2.405680000  | 8  | -3.258122000                | -1.893915000 | 0.342101000  |
| 1 | 0.011198000  | 1.666594000  | 3.709904000  | 6  | -4.106083000                | 0.078123000  | -0.639244000 |
| 6 | 1.762347000  | 4.170132000  | 1.445652000  | 6  | -4.440356000                | -1.431243000 | -0.364321000 |
| 1 | 2.564679000  | 4.298190000  | 0.712222000  | 6  | -5.614592000                | -1.614015000 | 0.594073000  |
| 1 | 0.937770000  | 4.835746000  | 1.168353000  | 6  | -4.629566000                | -2.281427000 | -1.608395000 |
| 1 | 2.139820000  | 4.505172000  | 2.419298000  | 6  | -5.296507000                | 1.020292000  | -0.579166000 |
| 6 | 2.700624000  | 1.418442000  | 2.294594000  | 6  | -3.333021000                | 0.278332000  | -1.936438000 |
| 1 | 3.623400000  | 1.720808000  | 1.786974000  | 1  | -2.944100000                | 1.299429000  | -1.971633000 |
| 1 | 2.829127000  | 1.631958000  | 3.362316000  | 1  | -2.488044000                | -0.410508000 | -2.000101000 |
| 1 | 2.602127000  | 0.333403000  | 2.177263000  | 1  | -3.986190000                | 0.123548000  | -2.800657000 |
| 6 | 3.548293000  | 1.141150000  | -1.398712000 | 1  | -4.956975000                | 2.041326000  | -0.775238000 |
| 1 | 2.791795000  | 1.479554000  | -2.113470000 | 1  | -5.777105000                | 1.000247000  | 0.400716000  |
| 1 | 3.426065000  | 1.732631000  | -0.488533000 | 1  | -6.033896000                | 0.750709000  | -1.342569000 |
| 1 | 4.532371000  | 1.363816000  | -1.829523000 | 1  | -5.486493000                | -1.005270000 | 1.494830000  |
| 6 | 3.669980000  | -1.474946000 | -2.826773000 | 1  | -5.665376000                | -2.663691000 | 0.894164000  |
| 1 | 4.535107000  | -1.024497000 | -3.327449000 | 1  | -6.560888000                | -1.339006000 | 0.119394000  |
| 1 | 3.819662000  | -2.557471000 | -2.813300000 | 1  | -5.466321000                | -1.903135000 | -2.204967000 |
| 1 | 2.785603000  | -1.267491000 | -3.440426000 | 1  | -4.854828000                | -3.310044000 | -1.314555000 |
| 6 | 4.939047000  | -1.176956000 | -0.037860000 | 1  | -3.729459000                | -2.290175000 | -2.225035000 |
| 1 | 5.866084000  | -0.825457000 | -0.505158000 |    |                             |              |              |
| 1 | 4.858462000  | -0.702015000 | 0.946778000  |    | <b>1-IM3 (in gas phase)</b> |              |              |
| 1 | 5.039042000  | -2.256096000 | 0.119707000  | 7  | 0.547004000                 | 1.349199000  | -0.065684000 |
| 6 | 2.734438000  | -4.131029000 | -0.850515000 | 13 | 1.322354000                 | -0.140483000 | -0.839029000 |
| 1 | 3.811161000  | -3.948447000 | -0.919674000 | 1  | -1.492903000                | -2.438406000 | 0.665231000  |
| 1 | 2.598088000  | -5.130296000 | -0.420403000 | 7  | 2.989986000                 | -0.730539000 | -0.325872000 |
| 1 | 2.328306000  | -4.146908000 | -1.867228000 | 14 | 0.185540000                 | 1.363145000  | 1.633138000  |
| 6 | 2.510648000  | -3.030551000 | 1.983144000  | 14 | 0.003053000                 | 2.681950000  | -1.060255000 |
| 1 | 2.381822000  | -4.047659000 | 2.371164000  | 14 | 4.310656000                 | 0.334731000  | 0.069988000  |
| 1 | 3.578752000  | -2.791620000 | 2.015161000  | 14 | 3.265859000                 | -2.455361000 | -0.350804000 |
| 1 | 2.001096000  | -2.339033000 | 2.662695000  | 6  | 0.305495000                 | 2.340897000  | -2.888276000 |
| 6 | 0.028527000  | -3.463802000 | 0.256794000  | 1  | 0.016594000                 | 3.228585000  | -3.463391000 |
| 1 | -0.609306000 | -2.966719000 | 0.994386000  | 1  | 1.359061000                 | 2.133363000  | -3.108289000 |
| 1 | -0.452262000 | -3.331519000 | -0.717879000 | 1  | -0.275612000                | 1.489662000  | -3.252489000 |
| 1 | 0.015716000  | -4.534214000 | 0.494942000  | 6  | -1.848128000                | 2.998799000  | -0.838947000 |
| 6 | -0.788118000 | -0.759371000 | 2.543084000  | 1  | -2.095416000                | 3.297026000  | 0.187046000  |
| 8 | 0.224283000  | -0.530217000 | 1.890651000  | 1  | -2.167406000                | 3.814234000  | -1.498789000 |

|   |              |              |              |    |                             |              |              |
|---|--------------|--------------|--------------|----|-----------------------------|--------------|--------------|
| 1 | -2.443395000 | 2.113094000  | -1.086802000 | 1  | 2.487973000                 | -4.377269000 | -1.701106000 |
| 6 | 0.866625000  | 4.322836000  | -0.684312000 | 6  | -0.987465000                | -1.663144000 | 0.079423000  |
| 1 | 0.643374000  | 5.030589000  | -1.491964000 | 8  | 0.227268000                 | -1.564139000 | 0.088794000  |
| 1 | 0.527020000  | 4.777369000  | 0.250438000  | 8  | -1.752050000                | -0.861925000 | -0.623957000 |
| 1 | 1.953921000  | 4.216183000  | -0.626776000 | 1  | 0.905646000                 | -0.451390000 | -2.335734000 |
| 6 | -1.596375000 | 0.779965000  | 2.004508000  | 5  | -3.134580000                | -0.862234000 | -0.393308000 |
| 1 | -1.929358000 | 1.196902000  | 2.962537000  | 8  | -3.937948000                | 0.071576000  | -0.942032000 |
| 1 | -2.285422000 | 1.135902000  | 1.228480000  | 8  | -3.742054000                | -1.792675000 | 0.389593000  |
| 1 | -1.700660000 | -0.309455000 | 2.091349000  | 6  | -5.296404000                | -0.368941000 | -0.666229000 |
| 6 | 0.291785000  | 3.082347000  | 2.406501000  | 6  | -5.104279000                | -1.306944000 | 0.578372000  |
| 1 | 1.257454000  | 3.558264000  | 2.206691000  | 6  | -5.118779000                | -0.554815000 | 1.904963000  |
| 1 | -0.494577000 | 3.757366000  | 2.052157000  | 6  | -6.042610000                | -2.499705000 | 0.625139000  |
| 1 | 0.180954000  | 2.990158000  | 3.493549000  | 6  | -6.156642000                | 0.855679000  | -0.409854000 |
| 6 | 1.363505000  | 0.265362000  | 2.610814000  | 6  | -5.770409000                | -1.115325000 | -1.909356000 |
| 1 | 2.354621000  | 0.729500000  | 2.650286000  | 1  | -5.687582000                | -0.450032000 | -2.772148000 |
| 1 | 1.003843000  | 0.160761000  | 3.641360000  | 1  | -5.154421000                | -2.000007000 | -2.099130000 |
| 1 | 1.492850000  | -0.735736000 | 2.187846000  | 1  | -6.812671000                | -1.430704000 | -1.808636000 |
| 6 | 3.746817000  | 2.130829000  | 0.174109000  | 1  | -6.229701000                | 1.447141000  | -1.326023000 |
| 1 | 3.340881000  | 2.461804000  | -0.789355000 | 1  | -5.727966000                | 1.486504000  | 0.370895000  |
| 1 | 2.979160000  | 2.316821000  | 0.929549000  | 1  | -7.166642000                | 0.555712000  | -0.111835000 |
| 1 | 4.615065000  | 2.761870000  | 0.398627000  | 1  | -4.443591000                | 0.305866000  | 1.882955000  |
| 6 | 5.661367000  | 0.354381000  | -1.254591000 | 1  | -4.782968000                | -1.229379000 | 2.697068000  |
| 1 | 6.321360000  | 1.215712000  | -1.096857000 | 1  | -6.126562000                | -0.206368000 | 2.147869000  |
| 1 | 6.284894000  | -0.543223000 | -1.255055000 | 1  | -7.082039000                | -2.159932000 | 0.678404000  |
| 1 | 5.216819000  | 0.454250000  | -2.251258000 | 1  | -5.832333000                | -3.096071000 | 1.516804000  |
| 6 | 5.123778000  | -0.133701000 | 1.711479000  | 1  | -5.925031000                | -3.138171000 | -0.252117000 |
| 1 | 5.924984000  | 0.573929000  | 1.954379000  |    |                             |              |              |
| 1 | 4.403840000  | -0.125073000 | 2.536093000  |    | <b>1-TS4 (in gas phase)</b> |              |              |
| 1 | 5.570081000  | -1.133616000 | 1.677821000  | 7  | -0.504295000                | 1.535046000  | -0.060354000 |
| 6 | 5.041905000  | -2.931773000 | -0.787776000 | 13 | -0.956773000                | -0.228149000 | 0.018112000  |
| 1 | 5.793000000  | -2.541074000 | -0.094852000 | 1  | 0.958496000                 | -2.334231000 | -1.001256000 |
| 1 | 5.118347000  | -4.025628000 | -0.770361000 | 7  | -2.601205000                | -0.944476000 | 0.314733000  |
| 1 | 5.305105000  | -2.596809000 | -1.796360000 | 14 | -0.980152000                | 2.380833000  | -1.517535000 |
| 6 | 2.881924000  | -3.224568000 | 1.331101000  | 14 | 0.620304000                 | 2.248781000  | 1.061687000  |
| 1 | 3.125610000  | -4.293141000 | 1.346541000  | 14 | -3.813182000                | -0.119752000 | 1.269232000  |
| 1 | 3.461685000  | -2.734368000 | 2.121493000  | 14 | -2.982561000                | -2.465516000 | -0.466293000 |
| 1 | 1.821509000  | -3.115197000 | 1.581195000  | 6  | 1.186236000                 | 0.984474000  | 2.349245000  |
| 6 | 2.218176000  | -3.314873000 | -1.668568000 | 1  | 1.823813000                 | 1.488177000  | 3.086593000  |
| 1 | 1.140717000  | -3.252932000 | -1.495254000 | 1  | 0.341723000                 | 0.544900000  | 2.894619000  |
| 1 | 2.418313000  | -2.886806000 | -2.656376000 | 1  | 1.750122000                 | 0.151763000  | 1.915216000  |



|   |              |              |              |    |                             |              |              |
|---|--------------|--------------|--------------|----|-----------------------------|--------------|--------------|
| 6 | 2.159474000  | 2.895281000  | 0.175331000  | 6  | -1.469860000                | -3.605642000 | -0.547670000 |
| 1 | 1.913092000  | 3.711472000  | -0.513591000 | 1  | -0.932608000                | -3.488049000 | -1.494007000 |
| 1 | 2.882839000  | 3.287747000  | 0.900636000  | 1  | -0.776055000                | -3.423260000 | 0.281631000  |
| 1 | 2.655437000  | 2.111348000  | -0.409072000 | 1  | -1.790047000                | -4.651255000 | -0.482005000 |
| 6 | -0.105110000 | 3.694354000  | 2.034966000  | 6  | 0.745676000                 | -1.294739000 | -1.266829000 |
| 1 | 0.605989000  | 4.009644000  | 2.808015000  | 8  | -0.369220000                | -0.928508000 | -1.711193000 |
| 1 | -0.310155000 | 4.562677000  | 1.402416000  | 8  | 1.791297000                 | -0.498390000 | -1.417209000 |
| 1 | -1.039833000 | 3.416855000  | 2.532228000  | 1  | 0.315078000                 | -1.082239000 | 0.623294000  |
| 6 | 0.283606000  | 2.195210000  | -2.902511000 | 5  | 2.978349000                 | -0.741846000 | -0.728418000 |
| 1 | -0.002830000 | 2.799943000  | -3.770866000 | 8  | 4.106137000                 | -0.046543000 | -1.007646000 |
| 1 | 1.282481000  | 2.510889000  | -2.584260000 | 8  | 3.083071000                 | -1.673891000 | 0.255113000  |
| 1 | 0.352227000  | 1.150506000  | -3.219736000 | 6  | 5.039485000                 | -0.370695000 | 0.057613000  |
| 6 | -1.236042000 | 4.224242000  | -1.202268000 | 6  | 4.500025000                 | -1.753044000 | 0.572252000  |
| 1 | -1.952672000 | 4.396638000  | -0.391901000 | 6  | 5.054046000                 | -2.939725000 | -0.210250000 |
| 1 | -0.306379000 | 4.744125000  | -0.946752000 | 6  | 4.645937000                 | -1.974858000 | 2.067461000  |
| 1 | -1.634445000 | 4.694743000  | -2.108682000 | 6  | 6.442219000                 | -0.415680000 | -0.523990000 |
| 6 | -2.629766000 | 1.691176000  | -2.116858000 | 6  | 4.925835000                 | 0.741779000  | 1.095428000  |
| 1 | -3.422629000 | 1.904698000  | -1.391365000 | 1  | 5.135145000                 | 1.698258000  | 0.609201000  |
| 1 | -2.910038000 | 2.161766000  | -3.066259000 | 1  | 3.916772000                 | 0.792796000  | 1.517158000  |
| 1 | -2.611906000 | 0.607598000  | -2.278772000 | 1  | 5.641348000                 | 0.596422000  | 1.909971000  |
| 6 | -3.184209000 | 1.557310000  | 1.855543000  | 1  | 6.727051000                 | 0.583894000  | -0.862082000 |
| 1 | -2.296585000 | 1.442915000  | 2.490316000  | 1  | 6.502164000                 | -1.095391000 | -1.375808000 |
| 1 | -2.914224000 | 2.237379000  | 1.043149000  | 1  | 7.159286000                 | -0.737774000 | 0.238316000  |
| 1 | -3.962177000 | 2.032673000  | 2.464796000  | 1  | 4.950093000                 | -2.784273000 | -1.288849000 |
| 6 | -4.244246000 | -1.055102000 | 2.853332000  | 1  | 4.493274000                 | -3.836886000 | 0.064236000  |
| 1 | -4.786750000 | -0.390508000 | 3.536020000  | 1  | 6.110761000                 | -3.106061000 | 0.016800000  |
| 1 | -4.869268000 | -1.935358000 | 2.683467000  | 1  | 5.702399000                 | -1.950748000 | 2.354410000  |
| 1 | -3.332354000 | -1.383761000 | 3.364304000  | 1  | 4.239869000                 | -2.954359000 | 2.333188000  |
| 6 | -5.399254000 | 0.145621000  | 0.280802000  | 1  | 4.106102000                 | -1.214506000 | 2.635408000  |
| 1 | -6.137610000 | 0.690034000  | 0.880586000  |    |                             |              |              |
| 1 | -5.206677000 | 0.726234000  | -0.627164000 |    |                             |              |              |
| 1 | -5.858662000 | -0.800124000 | -0.026260000 |    |                             |              |              |
| 6 | -4.299869000 | -3.444184000 | 0.467092000  |    |                             |              |              |
| 1 | -5.252112000 | -2.917164000 | 0.577904000  |    |                             |              |              |
| 1 | -4.499798000 | -4.366898000 | -0.090657000 |    |                             |              |              |
| 1 | -3.951581000 | -3.728520000 | 1.465473000  |    |                             |              |              |
| 6 | -3.594507000 | -2.179722000 | -2.224135000 |    |                             |              |              |
| 1 | -3.906559000 | -3.118163000 | -2.696753000 |    |                             |              |              |
| 1 | -4.447530000 | -1.492219000 | -2.238977000 |    |                             |              |              |
| 1 | -2.799316000 | -1.741695000 | -2.837400000 |    |                             |              |              |
|   |              |              |              |    | <b>1-IM4 (in gas phase)</b> |              |              |
|   |              |              |              | 7  | 2.268531000                 | -0.801958000 | 0.001531000  |
|   |              |              |              | 13 | 0.827507000                 | 0.138692000  | -0.580105000 |
|   |              |              |              | 1  | 0.183482000                 | -1.958914000 | -2.696610000 |
|   |              |              |              | 7  | 0.120055000                 | 1.643244000  | 0.140945000  |
|   |              |              |              | 14 | 3.703499000                 | -0.344492000 | -0.891904000 |
|   |              |              |              | 14 | 2.221365000                 | -2.230949000 | 0.993655000  |
|   |              |              |              | 14 | 0.417118000                 | 2.131751000  | 1.797939000  |
|   |              |              |              | 14 | -0.759513000                | 2.751186000  | -0.902596000 |
|   |              |              |              | 6  | 0.457018000                 | -2.557819000 | 1.587382000  |

|   |              |              |              |                             |              |              |              |
|---|--------------|--------------|--------------|-----------------------------|--------------|--------------|--------------|
| 1 | 0.476851000  | -3.241627000 | 2.443611000  | 1                           | -0.106418000 | 4.667412000  | -2.368554000 |
| 1 | -0.079819000 | -1.655265000 | 1.902760000  | 1                           | 1.052052000  | 4.472513000  | -1.039497000 |
| 1 | -0.139893000 | -3.032546000 | 0.801058000  | 1                           | 1.101409000  | 3.373656000  | -2.424088000 |
| 6 | 2.775247000  | -3.747685000 | 0.013040000  | 6                           | -1.748203000 | 1.889868000  | -2.263344000 |
| 1 | 3.837961000  | -3.692463000 | -0.250317000 | 1                           | -1.095622000 | 1.578845000  | -3.083313000 |
| 1 | 2.630290000  | -4.663756000 | 0.597262000  | 1                           | -2.310038000 | 1.011449000  | -1.923892000 |
| 1 | 2.206596000  | -3.844599000 | -0.918805000 | 1                           | -2.481799000 | 2.601221000  | -2.661521000 |
| 6 | 3.339821000  | -2.155242000 | 2.513904000  | 6                           | -0.236376000 | -0.985503000 | -2.417476000 |
| 1 | 3.150895000  | -3.036882000 | 3.138499000  | 8                           | 0.669456000  | 0.023212000  | -2.378629000 |
| 1 | 4.399790000  | -2.169694000 | 2.243889000  | 8                           | -0.630954000 | -1.130497000 | -0.974267000 |
| 1 | 3.163396000  | -1.266706000 | 3.126064000  | 1                           | -1.149196000 | -0.761522000 | -2.981071000 |
| 6 | 3.897600000  | -1.331921000 | -2.483538000 | 5                           | -1.943635000 | -1.202540000 | -0.549172000 |
| 1 | 2.999516000  | -1.201927000 | -3.097036000 | 8                           | -2.977605000 | -1.483363000 | -1.392465000 |
| 1 | 4.759478000  | -0.982792000 | -3.063723000 | 8                           | -2.291985000 | -1.009676000 | 0.751763000  |
| 1 | 4.031561000  | -2.401484000 | -2.292941000 | 6                           | -4.123874000 | -1.727966000 | -0.534558000 |
| 6 | 5.268720000  | -0.538421000 | 0.138921000  | 6                           | -3.740610000 | -0.944217000 | 0.768400000  |
| 1 | 5.174713000  | -0.048472000 | 1.113768000  | 6                           | -4.121973000 | 0.531774000  | 0.708150000  |
| 1 | 5.516464000  | -1.591367000 | 0.312279000  | 6                           | -4.237776000 | -1.571457000 | 2.059686000  |
| 1 | 6.116342000  | -0.086318000 | -0.388525000 | 6                           | -5.372898000 | -1.225127000 | -1.236574000 |
| 6 | 3.510953000  | 1.473099000  | -1.373675000 | 6                           | -4.192309000 | -3.237050000 | -0.318101000 |
| 1 | 3.298337000  | 2.113175000  | -0.508766000 | 1                           | -4.257129000 | -3.731368000 | -1.290745000 |
| 1 | 4.431951000  | 1.839929000  | -1.840913000 | 1                           | -3.295672000 | -3.600876000 | 0.194328000  |
| 1 | 2.706770000  | 1.612008000  | -2.107348000 | 1                           | -5.068967000 | -3.514071000 | 0.274264000  |
| 6 | 1.687686000  | 1.036316000  | 2.647301000  | 1                           | -5.560135000 | -1.829146000 | -2.128367000 |
| 1 | 1.313384000  | 0.017670000  | 2.791085000  | 1                           | -5.262817000 | -0.183503000 | -1.544345000 |
| 1 | 2.630394000  | 0.966729000  | 2.096676000  | 1                           | -6.241743000 | -1.310056000 | -0.575555000 |
| 1 | 1.894273000  | 1.452705000  | 3.640934000  | 1                           | -3.771474000 | 0.994297000  | -0.220198000 |
| 6 | -1.147457000 | 1.975267000  | 2.842076000  | 1                           | -3.648783000 | 1.052108000  | 1.545359000  |
| 1 | -0.920210000 | 2.129013000  | 3.903237000  | 1                           | -5.205679000 | 0.664910000  | 0.778177000  |
| 1 | -1.934603000 | 2.680377000  | 2.560969000  | 1                           | -5.331754000 | -1.620716000 | 2.064504000  |
| 1 | -1.541673000 | 0.958150000  | 2.723467000  | 1                           | -3.918515000 | -0.957803000 | 2.906575000  |
| 6 | 1.111899000  | 3.886145000  | 1.883402000  | 1                           | -3.836170000 | -2.577280000 | 2.195368000  |
| 1 | 1.266325000  | 4.176876000  | 2.928902000  |                             |              |              |              |
| 1 | 2.086837000  | 3.921093000  | 1.383050000  |                             |              |              |              |
| 1 | 0.476092000  | 4.645234000  | 1.418847000  | <b>1-TS5 (in gas phase)</b> |              |              |              |
| 6 | -2.034892000 | 3.775972000  | 0.047667000  | 7                           | -0.664850000 | 1.792916000  | 0.114448000  |
| 1 | -1.624605000 | 4.363264000  | 0.873650000  | 13                          | -0.775624000 | 0.087939000  | -0.488047000 |
| 1 | -2.494680000 | 4.479494000  | -0.656898000 | 1                           | 0.720724000  | -0.347856000 | -3.444272000 |
| 1 | -2.834860000 | 3.146077000  | 0.450795000  | 7                           | -1.930116000 | -1.201539000 | 0.062355000  |
| 6 | 0.431044000  | 3.930854000  | -1.760493000 | 14                          | -0.330499000 | 3.094256000  | -1.011166000 |
|   |              |              |              | 14                          | -0.458846000 | 2.039495000  | 1.837157000  |

|    |              |              |              |    |                             |              |              |
|----|--------------|--------------|--------------|----|-----------------------------|--------------|--------------|
| 14 | -3.633578000 | -0.870396000 | -0.160566000 | 1  | -2.280745000                | -4.823059000 | 1.534520000  |
| 14 | -1.361074000 | -2.809480000 | 0.447160000  | 1  | -2.932453000                | -3.371540000 | 2.302947000  |
| 6  | -0.646215000 | 0.402586000  | 2.749060000  | 6  | -0.855942000                | -3.758441000 | -1.109969000 |
| 1  | -0.537048000 | 0.583514000  | 3.825175000  | 1  | -0.740285000                | -4.826823000 | -0.894823000 |
| 1  | -1.606919000 | -0.092627000 | 2.577541000  | 1  | -1.605364000                | -3.659419000 | -1.904223000 |
| 1  | 0.150528000  | -0.291445000 | 2.457535000  | 1  | 0.107678000                 | -3.396188000 | -1.487530000 |
| 6  | 1.292271000  | 2.611137000  | 2.255169000  | 6  | 0.124605000                 | -2.834454000 | 1.609881000  |
| 1  | 1.380325000  | 2.850837000  | 3.321232000  | 1  | 0.925505000                 | -2.146229000 | 1.321987000  |
| 1  | 1.969114000  | 1.778001000  | 2.033974000  | 1  | -0.172683000                | -2.587061000 | 2.634066000  |
| 1  | 1.632444000  | 3.481303000  | 1.685986000  | 1  | 0.542290000                 | -3.849173000 | 1.620701000  |
| 6  | -1.740271000 | 3.228286000  | 2.542889000  | 6  | -0.142837000                | -0.626199000 | -2.828561000 |
| 1  | -1.681642000 | 3.231714000  | 3.637467000  | 8  | -0.940531000                | 0.249681000  | -2.436161000 |
| 1  | -1.609963000 | 4.258056000  | 2.200263000  | 8  | 0.772280000                 | -0.732743000 | -0.955342000 |
| 1  | -2.750018000 | 2.905140000  | 2.265283000  | 1  | -0.388279000                | -1.689562000 | -2.749221000 |
| 6  | 1.364353000  | 2.788234000  | -1.787115000 | 5  | 2.064879000                 | -0.740034000 | -0.571521000 |
| 1  | 1.645173000  | 3.560328000  | -2.511455000 | 8  | 2.506357000                 | -0.267735000 | 0.647588000  |
| 1  | 2.123019000  | 2.766076000  | -0.995747000 | 8  | 3.079352000                 | -1.254294000 | -1.348934000 |
| 1  | 1.395395000  | 1.818162000  | -2.298647000 | 6  | 3.948802000                 | -0.286517000 | 0.599995000  |
| 6  | -0.302935000 | 4.793053000  | -0.182121000 | 6  | 4.225698000                 | -1.382956000 | -0.482663000 |
| 1  | -1.318118000 | 5.107008000  | 0.082930000  | 6  | 5.491063000                 | -1.169374000 | -1.296801000 |
| 1  | 0.319044000  | 4.870643000  | 0.712924000  | 6  | 4.192636000                 | -2.797632000 | 0.093575000  |
| 1  | 0.078837000  | 5.516892000  | -0.912287000 | 6  | 4.408536000                 | 1.099734000  | 0.153949000  |
| 6  | -1.633705000 | 3.291995000  | -2.357517000 | 6  | 4.478385000                 | -0.607184000 | 1.987717000  |
| 1  | -2.619069000 | 3.465871000  | -1.911507000 | 1  | 4.240264000                 | 0.215571000  | 2.668189000  |
| 1  | -1.385178000 | 4.172615000  | -2.962405000 | 1  | 4.025143000                 | -1.518678000 | 2.382729000  |
| 1  | -1.708021000 | 2.431873000  | -3.025735000 | 1  | 5.566485000                 | -0.730762000 | 1.966353000  |
| 6  | -3.854243000 | 0.894387000  | -0.786835000 | 1  | 4.000060000                 | 1.848816000  | 0.838321000  |
| 1  | -3.479285000 | 1.638653000  | -0.076036000 | 1  | 4.046764000                 | 1.323714000  | -0.854744000 |
| 1  | -3.346548000 | 1.064094000  | -1.743105000 | 1  | 5.499882000                 | 1.178964000  | 0.160768000  |
| 1  | -4.922148000 | 1.085173000  | -0.946145000 | 1  | 5.456445000                 | -0.226043000 | -1.844981000 |
| 6  | -4.637064000 | -1.005786000 | 1.429485000  | 1  | 5.602480000                 | -1.982139000 | -2.019884000 |
| 1  | -4.165863000 | -0.425524000 | 2.230875000  | 1  | 6.371154000                 | -1.167980000 | -0.644900000 |
| 1  | -5.638878000 | -0.591422000 | 1.266671000  | 1  | 5.067664000                 | -2.997172000 | 0.719261000  |
| 1  | -4.756418000 | -2.033454000 | 1.781907000  | 1  | 4.182304000                 | -3.513692000 | -0.732439000 |
| 6  | -4.361499000 | -2.011078000 | -1.478236000 | 1  | 3.290153000                 | -2.954730000 | 0.693954000  |
| 1  | -5.431906000 | -1.822308000 | -1.617374000 |    |                             |              |              |
| 1  | -3.863235000 | -1.827356000 | -2.437705000 |    |                             |              |              |
| 1  | -4.239176000 | -3.072880000 | -1.240352000 |    |                             |              |              |
| 6  | -2.682961000 | -3.822461000 | 1.336603000  |    |                             |              |              |
| 1  | -3.611920000 | -3.948088000 | 0.772154000  |    |                             |              |              |
|    |              |              |              |    | <b>1-IM5 (in gas phase)</b> |              |              |
|    |              |              |              | 7  | -1.048125000                | 1.653956000  | 0.009858000  |
|    |              |              |              | 13 | -0.551654000                | -0.025161000 | -0.362892000 |
|    |              |              |              | 7  | -1.551536000                | -1.496527000 | -0.138101000 |

|    |              |              |              |    |              |              |              |
|----|--------------|--------------|--------------|----|--------------|--------------|--------------|
| 14 | -0.502215000 | 2.920001000  | -1.079777000 | 6  | -1.926028000 | -4.041736000 | 1.404885000  |
| 14 | -1.864117000 | 2.017087000  | 1.517311000  | 1  | -2.716657000 | -4.442479000 | 0.763180000  |
| 14 | -3.170327000 | -1.573284000 | -0.796442000 | 1  | -1.379538000 | -4.894173000 | 1.824357000  |
| 14 | -0.722192000 | -2.904009000 | 0.505602000  | 1  | -2.402594000 | -3.511532000 | 2.236981000  |
| 6  | -1.710847000 | 0.544383000  | 2.684364000  | 6  | 0.183539000  | -3.836379000 | -0.851509000 |
| 1  | -2.200355000 | 0.773090000  | 3.638020000  | 1  | 0.720782000  | -4.704669000 | -0.453832000 |
| 1  | -2.163040000 | -0.368022000 | 2.281326000  | 1  | -0.507620000 | -4.190645000 | -1.623595000 |
| 1  | -0.656189000 | 0.332517000  | 2.901986000  | 1  | 0.911675000  | -3.173792000 | -1.333542000 |
| 6  | -1.042466000 | 3.475840000  | 2.384075000  | 6  | 0.531168000  | -2.341320000 | 1.801627000  |
| 1  | -1.078076000 | 4.403481000  | 1.804163000  | 1  | 1.199755000  | -1.536094000 | 1.470483000  |
| 1  | -1.537356000 | 3.668150000  | 3.342901000  | 1  | 0.019665000  | -1.996731000 | 2.706905000  |
| 1  | 0.009612000  | 3.249259000  | 2.589156000  | 1  | 1.169517000  | -3.186521000 | 2.087150000  |
| 6  | -3.689594000 | 2.398226000  | 1.254430000  | 8  | 0.995902000  | -0.304737000 | -1.071687000 |
| 1  | -4.179649000 | 2.611557000  | 2.211300000  | 5  | 2.268198000  | -0.248758000 | -0.648842000 |
| 1  | -3.833369000 | 3.267192000  | 0.604174000  | 8  | 2.633605000  | 0.257604000  | 0.591252000  |
| 1  | -4.210138000 | 1.550415000  | 0.795551000  | 8  | 3.349028000  | -0.722109000 | -1.360009000 |
| 6  | 1.154698000  | 3.603896000  | -0.510934000 | 6  | 4.073081000  | 0.273488000  | 0.634031000  |
| 1  | 1.609251000  | 4.253293000  | -1.267101000 | 6  | 4.444581000  | -0.810980000 | -0.432653000 |
| 1  | 1.061244000  | 4.176871000  | 0.417399000  | 6  | 5.747255000  | -0.555511000 | -1.173281000 |
| 1  | 1.838040000  | 2.769322000  | -0.315166000 | 6  | 4.426247000  | -2.228208000 | 0.140170000  |
| 6  | -1.788827000 | 4.291691000  | -1.203004000 | 6  | 4.524119000  | 1.674732000  | 0.227724000  |
| 1  | -2.731852000 | 3.893323000  | -1.594079000 | 6  | 4.527586000  | -0.043493000 | 2.049765000  |
| 1  | -2.001236000 | 4.781262000  | -0.247531000 | 1  | 4.230429000  | 0.767719000  | 2.720308000  |
| 1  | -1.440860000 | 5.063902000  | -1.898475000 | 1  | 4.074526000  | -0.968873000 | 2.411939000  |
| 6  | -0.310047000 | 2.200206000  | -2.810627000 | 1  | 5.617670000  | -0.141843000 | 2.092134000  |
| 1  | -1.268659000 | 1.821056000  | -3.183691000 | 1  | 4.058361000  | 2.404390000  | 0.896087000  |
| 1  | 0.021264000  | 2.981067000  | -3.504751000 | 1  | 4.213058000  | 1.901398000  | -0.797341000 |
| 1  | 0.424022000  | 1.388946000  | -2.853969000 | 1  | 5.610953000  | 1.781887000  | 0.295635000  |
| 6  | -3.470439000 | -0.056744000 | -1.879237000 | 1  | 5.712917000  | 0.387870000  | -1.721451000 |
| 1  | -3.347638000 | 0.889747000  | -1.342146000 | 1  | 5.922744000  | -1.361259000 | -1.891342000 |
| 1  | -2.783813000 | -0.050842000 | -2.735762000 | 1  | 6.589678000  | -0.529234000 | -0.473650000 |
| 1  | -4.488359000 | -0.084636000 | -2.284707000 | 1  | 5.269023000  | -2.403700000 | 0.815503000  |
| 6  | -4.479168000 | -1.632362000 | 0.555990000  | 1  | 4.484208000  | -2.940401000 | -0.687160000 |
| 1  | -5.484853000 | -1.587284000 | 0.122803000  | 1  | 3.494748000  | -2.415978000 | 0.685730000  |
| 1  | -4.410525000 | -2.553387000 | 1.143718000  |    |              |              |              |
| 1  | -4.374177000 | -0.788881000 | 1.247196000  |    |              |              |              |
| 6  | -3.364497000 | -3.074711000 | -1.920209000 | 7  | 1.058841000  | -1.927433000 | 0.289855000  |
| 1  | -4.374553000 | -3.103655000 | -2.344638000 | 13 | 1.416652000  | -0.142190000 | 0.287918000  |
| 1  | -2.653493000 | -3.017883000 | -2.751854000 | 1  | -0.201632000 | -0.610658000 | -2.442111000 |
| 1  | -3.196963000 | -4.025610000 | -1.404600000 | 7  | 3.057361000  | 0.533854000  | -0.140537000 |

**1-TS5' (in gas phase)**

|    |              |              |              |   |              |              |              |
|----|--------------|--------------|--------------|---|--------------|--------------|--------------|
| 14 | 1.639486000  | -2.960299000 | -0.994949000 | 6 | 5.028888000  | 1.357074000  | -2.218461000 |
| 14 | -0.004762000 | -2.599332000 | 1.516530000  | 1 | 4.978645000  | 0.382184000  | -2.716937000 |
| 14 | 4.327518000  | 0.031725000  | 0.952974000  | 1 | 5.236365000  | 2.114583000  | -2.983089000 |
| 14 | 3.398351000  | 1.751262000  | -1.346820000 | 1 | 5.884702000  | 1.339888000  | -1.535028000 |
| 6  | -1.070111000 | -1.291030000 | 2.365649000  | 6 | 2.088549000  | 1.873469000  | -2.705700000 |
| 1  | -1.826375000 | -1.810937000 | 2.967143000  | 1 | 2.517635000  | 2.452373000  | -3.532406000 |
| 1  | -0.481903000 | -0.657389000 | 3.037467000  | 1 | 1.780720000  | 0.904286000  | -3.111609000 |
| 1  | -1.593169000 | -0.639348000 | 1.659082000  | 1 | 1.198923000  | 2.402577000  | -2.352297000 |
| 6  | -1.161689000 | -3.914351000 | 0.818687000  | 6 | 3.511456000  | 3.488361000  | -0.619386000 |
| 1  | -0.626265000 | -4.813188000 | 0.493808000  | 1 | 2.594910000  | 3.707201000  | -0.061739000 |
| 1  | -1.858074000 | -4.216596000 | 1.609904000  | 1 | 4.364183000  | 3.617575000  | 0.052750000  |
| 1  | -1.754485000 | -3.535897000 | -0.018479000 | 1 | 3.604499000  | 4.227092000  | -1.424774000 |
| 6  | 0.976347000  | -3.437199000 | 2.900143000  | 6 | -0.832631000 | -0.056096000 | -1.744439000 |
| 1  | 0.296601000  | -3.999586000 | 3.551548000  | 8 | 0.074928000  | 0.655533000  | -0.898011000 |
| 1  | 1.721956000  | -4.138922000 | 2.511126000  | 8 | -1.588731000 | -0.947133000 | -1.007898000 |
| 1  | 1.501150000  | -2.705385000 | 3.523058000  | 1 | -1.455424000 | 0.678532000  | -2.262979000 |
| 6  | 0.254853000  | -3.634460000 | -2.102006000 | 5 | -2.926621000 | -0.762493000 | -0.793648000 |
| 1  | -0.158729000 | -4.576888000 | -1.732410000 | 8 | -3.696883000 | 0.213209000  | -1.373070000 |
| 1  | -0.577725000 | -2.927264000 | -2.180370000 | 8 | -3.619152000 | -1.634929000 | -0.001159000 |
| 1  | 0.646816000  | -3.817821000 | -3.109310000 | 6 | -5.069103000 | -0.159099000 | -1.096446000 |
| 6  | 2.588445000  | -4.434858000 | -0.299254000 | 6 | -4.919628000 | -1.040444000 | 0.188914000  |
| 1  | 3.393122000  | -4.110460000 | 0.370056000  | 6 | -4.828954000 | -0.209935000 | 1.467037000  |
| 1  | 1.929751000  | -5.098524000 | 0.272855000  | 6 | -5.954726000 | -2.143237000 | 0.329629000  |
| 1  | 3.034432000  | -5.028192000 | -1.105478000 | 6 | -5.897450000 | 1.099990000  | -0.910678000 |
| 6  | 2.771362000  | -2.021978000 | -2.180495000 | 6 | -5.566044000 | -0.955762000 | -2.300519000 |
| 1  | 3.098240000  | -2.716432000 | -2.963896000 | 1 | -5.444592000 | -0.348007000 | -3.201104000 |
| 1  | 2.248062000  | -1.196904000 | -2.680043000 | 1 | -4.987808000 | -1.876744000 | -2.425051000 |
| 1  | 3.654699000  | -1.596091000 | -1.701205000 | 1 | -6.622774000 | -1.218707000 | -2.196869000 |
| 6  | 5.503991000  | -1.249669000 | 0.218181000  | 1 | -5.932966000 | 1.659081000  | -1.850082000 |
| 1  | 4.988450000  | -2.199294000 | 0.036519000  | 1 | -5.470748000 | 1.745241000  | -0.141128000 |
| 1  | 5.949721000  | -0.925457000 | -0.727410000 | 1 | -6.923295000 | 0.842179000  | -0.626456000 |
| 1  | 6.320527000  | -1.447668000 | 0.922853000  | 1 | -4.058166000 | 0.560349000  | 1.356750000  |
| 6  | 3.551260000  | -0.787231000 | 2.468075000  | 1 | -4.534662000 | -0.865744000 | 2.290877000  |
| 1  | 4.324187000  | -0.966102000 | 3.224637000  | 1 | -5.783426000 | 0.264462000  | 1.715283000  |
| 1  | 2.771260000  | -0.173303000 | 2.936648000  | 1 | -6.962337000 | -1.718080000 | 0.389894000  |
| 1  | 3.112345000  | -1.756532000 | 2.209158000  | 1 | -5.764018000 | -2.706144000 | 1.247190000  |
| 6  | 5.366230000  | 1.484043000  | 1.563944000  | 1 | -5.913128000 | -2.838209000 | -0.511136000 |
| 1  | 6.091215000  | 1.127718000  | 2.304933000  | 1 | 0.615457000  | 0.749673000  | 1.389793000  |
| 1  | 5.929329000  | 1.974629000  | 0.763244000  | 5 | -0.422291000 | 1.640844000  | 0.014925000  |
| 1  | 4.736421000  | 2.240364000  | 2.044020000  | 8 | 0.181954000  | 2.869517000  | 0.092542000  |

|                             |              |              |              |   |              |              |              |
|-----------------------------|--------------|--------------|--------------|---|--------------|--------------|--------------|
| 8                           | -1.727995000 | 1.624695000  | 0.433332000  | 6 | 1.869220000  | -3.662030000 | -1.956034000 |
| 6                           | -0.842842000 | 3.800353000  | 0.500254000  | 1 | 1.411859000  | -4.317948000 | -2.706203000 |
| 6                           | -1.910519000 | 2.865775000  | 1.165300000  | 1 | 2.931890000  | -3.916152000 | -1.897927000 |
| 6                           | -1.617683000 | 2.564623000  | 2.632312000  | 1 | 1.416997000  | -3.887511000 | -0.983019000 |
| 6                           | -3.340064000 | 3.349956000  | 0.987057000  | 6 | 2.392920000  | -1.403662000 | -4.012143000 |
| 6                           | -0.232597000 | 4.828660000  | 1.437379000  | 1 | 3.480763000  | -1.496348000 | -3.960081000 |
| 6                           | -1.352451000 | 4.466581000  | -0.776942000 | 1 | 2.038227000  | -2.040895000 | -4.830495000 |
| 1                           | -0.502800000 | 4.918872000  | -1.295504000 | 1 | 2.159318000  | -0.364965000 | -4.273367000 |
| 1                           | -1.809689000 | 3.729208000  | -1.445366000 | 6 | -0.313360000 | -1.763241000 | -2.770246000 |
| 1                           | -2.087553000 | 5.247634000  | -0.561983000 | 1 | -0.927672000 | -2.147005000 | -1.949959000 |
| 1                           | 0.498075000  | 5.431373000  | 0.890753000  | 1 | -0.669507000 | -0.760070000 | -3.018273000 |
| 1                           | 0.278075000  | 4.346237000  | 2.272843000  | 1 | -0.504878000 | -2.404130000 | -3.639979000 |
| 1                           | -1.005303000 | 5.498313000  | 1.830223000  | 6 | 1.932081000  | 3.424593000  | -1.508908000 |
| 1                           | -1.800702000 | 3.442005000  | 3.259931000  | 1 | 2.618522000  | 2.647033000  | -1.871791000 |
| 1                           | -0.582990000 | 2.236290000  | 2.767751000  | 1 | 0.990611000  | 3.318083000  | -2.056000000 |
| 1                           | -2.274595000 | 1.753681000  | 2.961423000  | 1 | 2.372244000  | 4.390769000  | -1.780642000 |
| 1                           | -4.027292000 | 2.719787000  | 1.558510000  | 6 | 3.290077000  | 3.977902000  | 1.138019000  |
| 1                           | -3.634720000 | 3.324551000  | -0.064430000 | 1 | 3.592845000  | 4.902781000  | 0.632524000  |
| 1                           | -3.439053000 | 4.374966000  | 1.360500000  | 1 | 3.183395000  | 4.206306000  | 2.201999000  |
|                             |              |              |              | 1 | 4.105401000  | 3.255573000  | 1.030274000  |
|                             |              |              |              | 6 | 0.296904000  | 4.523285000  | 0.847508000  |
| <b>1-TS6 (in gas phase)</b> |              |              |              | 1 | 0.242109000  | 4.659351000  | 1.934083000  |
| 7                           | 2.030159000  | -0.795566000 | -1.089181000 | 1 | 0.428743000  | 5.513334000  | 0.396260000  |
| 13                          | 0.927763000  | 0.537891000  | -0.546421000 | 1 | -0.660346000 | 4.105150000  | 0.517540000  |
| 7                           | 1.288984000  | 1.703512000  | 0.810566000  | 6 | 1.780317000  | 2.344104000  | 3.707627000  |
| 14                          | 1.531171000  | -1.856218000 | -2.396486000 | 1 | 1.519547000  | 3.406796000  | 3.661442000  |
| 14                          | 3.568164000  | -1.141679000 | -0.317278000 | 1 | 1.535694000  | 1.991056000  | 4.716300000  |
| 14                          | 1.688326000  | 3.343295000  | 0.364418000  | 1 | 2.863827000  | 2.255689000  | 3.574664000  |
| 14                          | 0.839380000  | 1.302505000  | 2.446185000  | 6 | -0.999692000 | 1.534209000  | 2.811801000  |
| 6                           | 4.267599000  | 0.362494000  | 0.575059000  | 1 | -1.187865000 | 1.387210000  | 3.882680000  |
| 1                           | 5.282372000  | 0.127142000  | 0.918189000  | 1 | -1.327396000 | 2.543594000  | 2.541274000  |
| 1                           | 4.339085000  | 1.209344000  | -0.118213000 | 1 | -1.635719000 | 0.837092000  | 2.256151000  |
| 1                           | 3.676755000  | 0.694133000  | 1.431088000  | 6 | 1.280313000  | -0.496363000 | 2.816506000  |
| 6                           | 3.426833000  | -2.601863000 | 0.880923000  | 1 | 0.862084000  | -1.209403000 | 2.096917000  |
| 1                           | 3.707932000  | -3.540714000 | 0.391954000  | 1 | 2.366088000  | -0.643744000 | 2.821764000  |
| 1                           | 4.084604000  | -2.468845000 | 1.747570000  | 1 | 0.906821000  | -0.771479000 | 3.811207000  |
| 1                           | 2.400706000  | -2.711296000 | 1.246118000  | 8 | -0.810474000 | -0.182960000 | -0.020271000 |
| 6                           | 4.898980000  | -1.580392000 | -1.587057000 | 5 | -1.320670000 | -1.353503000 | 0.508464000  |
| 1                           | 5.838735000  | -1.775633000 | -1.056444000 | 8 | -0.548904000 | -2.462843000 | 0.671434000  |
| 1                           | 4.670268000  | -2.469455000 | -2.182570000 | 8 | -2.603377000 | -1.468590000 | 0.950882000  |
| 1                           | 5.074654000  | -0.747890000 | -2.277098000 |   |              |              |              |

|   |              |              |              |                             |              |              |              |
|---|--------------|--------------|--------------|-----------------------------|--------------|--------------|--------------|
| 6 | -1.447059000 | -3.508588000 | 1.122873000  | <b>1-TS7 (in gas phase)</b> |              |              |              |
| 6 | -2.626809000 | -2.684716000 | 1.744825000  | 7                           | -1.632185000 | -0.042522000 | 0.027927000  |
| 6 | -3.995090000 | -3.329667000 | 1.614014000  | 13                          | -0.107193000 | 0.666764000  | -0.661245000 |
| 6 | -2.357931000 | -2.264145000 | 3.187288000  | 1                           | -0.188061000 | 1.194872000  | -2.207038000 |
| 6 | -1.866695000 | -4.296672000 | -0.114511000 | 7                           | 1.572968000  | 0.161443000  | -0.179477000 |
| 6 | -0.695816000 | -4.392312000 | 2.103207000  | 14                          | -1.594354000 | -1.683805000 | 0.655215000  |
| 1 | 0.104254000  | -4.920438000 | 1.576628000  | 14                          | -3.176564000 | 0.697692000  | -0.352734000 |
| 1 | -0.244934000 | -3.801082000 | 2.903296000  | 14                          | 2.225960000  | 0.819621000  | 1.308167000  |
| 1 | -1.368065000 | -5.136140000 | 2.543685000  | 14                          | 2.519615000  | -0.880449000 | -1.211493000 |
| 1 | -0.970230000 | -4.655712000 | -0.627750000 | 6                           | -2.962637000 | 2.352952000  | -1.240046000 |
| 1 | -2.428853000 | -3.665818000 | -0.810605000 | 1                           | -3.959948000 | 2.720256000  | -1.508798000 |
| 1 | -2.485075000 | -5.157720000 | 0.155880000  | 1                           | -2.496310000 | 3.105443000  | -0.596148000 |
| 1 | -4.264266000 | -3.484420000 | 0.567613000  | 1                           | -2.386957000 | 2.264882000  | -2.167149000 |
| 1 | -4.748599000 | -2.682422000 | 2.070813000  | 6                           | -4.178139000 | -0.391170000 | -1.524937000 |
| 1 | -4.012031000 | -4.294563000 | 2.131500000  | 1                           | -4.374200000 | -1.390455000 | -1.123474000 |
| 1 | -2.413342000 | -3.118307000 | 3.868384000  | 1                           | -5.145967000 | 0.070436000  | -1.751613000 |
| 1 | -3.108041000 | -1.526821000 | 3.485488000  | 1                           | -3.636749000 | -0.515229000 | -2.470004000 |
| 1 | -1.369665000 | -1.800826000 | 3.283064000  | 6                           | -4.180331000 | 1.082649000  | 1.196070000  |
| 1 | -0.053242000 | 1.187351000  | -1.690723000 | 1                           | -4.985754000 | 1.784106000  | 0.949271000  |
| 5 | -1.600483000 | 0.776017000  | -0.764748000 | 1                           | -4.637310000 | 0.199573000  | 1.649319000  |
| 8 | -1.925210000 | 1.991143000  | -0.214530000 | 1                           | -3.542730000 | 1.557930000  | 1.949639000  |
| 8 | -2.486184000 | 0.338351000  | -1.716563000 | 6                           | -1.401135000 | -2.902990000 | -0.772103000 |
| 6 | -2.907836000 | 2.564712000  | -1.104995000 | 1                           | -0.468694000 | -2.722773000 | -1.320981000 |
| 6 | -3.580983000 | 1.285389000  | -1.706372000 | 1                           | -1.378294000 | -3.939878000 | -0.417874000 |
| 6 | -4.656523000 | 0.702673000  | -0.792366000 | 1                           | -2.225246000 | -2.805880000 | -1.487326000 |
| 6 | -4.105195000 | 1.446701000  | -3.123010000 | 6                           | -3.164666000 | -2.124668000 | 1.604306000  |
| 6 | -3.833630000 | 3.449804000  | -0.287605000 | 1                           | -3.270590000 | -1.503169000 | 2.499499000  |
| 6 | -2.166272000 | 3.387801000  | -2.157219000 | 1                           | -4.086531000 | -2.041703000 | 1.021538000  |
| 1 | -1.547521000 | 4.135478000  | -1.652312000 | 1                           | -3.078269000 | -3.166532000 | 1.934981000  |
| 1 | -1.510875000 | 2.754598000  | -2.762830000 | 6                           | -0.182245000 | -1.979021000 | 1.864612000  |
| 1 | -2.867374000 | 3.905621000  | -2.818862000 | 1                           | -0.278224000 | -1.355011000 | 2.759371000  |
| 1 | -3.275249000 | 4.312360000  | 0.088028000  | 1                           | -0.200700000 | -3.028040000 | 2.184206000  |
| 1 | -4.243317000 | 2.908641000  | 0.567455000  | 1                           | 0.792047000  | -1.781226000 | 1.411309000  |
| 1 | -4.658998000 | 3.818171000  | -0.906326000 | 6                           | 0.837715000  | 1.313697000  | 2.498542000  |
| 1 | -4.282484000 | 0.596290000  | 0.230283000  | 1                           | 0.771050000  | 2.402937000  | 2.586408000  |
| 1 | -4.924486000 | -0.292611000 | -1.157458000 | 1                           | -0.146693000 | 0.952596000  | 2.180682000  |
| 1 | -5.554179000 | 1.328536000  | -0.784239000 | 1                           | 1.029643000  | 0.905908000  | 3.497281000  |
| 1 | -4.873943000 | 2.226044000  | -3.160044000 | 6                           | 3.257130000  | 2.364422000  | 0.958853000  |
| 1 | -4.553741000 | 0.506815000  | -3.456283000 | 1                           | 3.717102000  | 2.736032000  | 1.881914000  |
| 1 | -3.303094000 | 1.707730000  | -3.815863000 | 1                           | 4.059322000  | 2.169656000  | 0.239781000  |





|                             |              |              |              |   |              |              |              |
|-----------------------------|--------------|--------------|--------------|---|--------------|--------------|--------------|
| 1                           | -1.834301000 | -1.136313000 | -3.606233000 | 6 | -1.243269000 | 3.977993000  | 1.973425000  |
| 1                           | -0.728099000 | -2.524392000 | -3.553728000 | 1 | -1.131181000 | 4.280431000  | 3.021426000  |
| 8                           | -0.147893000 | -0.915064000 | -2.429024000 | 1 | -1.054236000 | 4.860498000  | 1.355643000  |
| <b>1-TS8 (in gas phase)</b> |              |              |              | 1 | -2.285505000 | 3.680724000  | 1.819973000  |
| 7                           | -1.989618000 | -1.061417000 | 0.083727000  | 6 | 1.703503000  | 3.264949000  | 1.592032000  |
| 13                          | -0.461388000 | -0.075301000 | 0.138588000  | 1 | 1.790665000  | 4.115274000  | 0.904857000  |
| 7                           | -0.381350000 | 1.743703000  | 0.096003000  | 1 | 2.011242000  | 3.609532000  | 2.585673000  |
| 14                          | -1.911102000 | -2.773702000 | 0.478150000  | 1 | 2.401044000  | 2.491686000  | 1.250564000  |
| 14                          | -3.582916000 | -0.349729000 | -0.135603000 | 6 | -0.727721000 | 4.333739000  | -1.382269000 |
| 14                          | -0.048561000 | 2.565488000  | 1.596541000  | 1 | -0.049774000 | 4.944027000  | -0.775352000 |
| 14                          | -0.194070000 | 2.525891000  | -1.448851000 | 1 | -0.725019000 | 4.752382000  | -2.395476000 |
| 6                           | -3.619875000 | 1.492182000  | 0.251299000  | 1 | -1.738082000 | 4.443530000  | -0.974118000 |
| 1                           | -4.657879000 | 1.839723000  | 0.182454000  | 6 | 1.573043000  | 2.501874000  | -2.108956000 |
| 1                           | -3.277028000 | 1.666455000  | 1.277725000  | 1 | 1.647705000  | 3.118992000  | -3.012379000 |
| 1                           | -3.001755000 | 2.107354000  | -0.404992000 | 1 | 2.275830000  | 2.893752000  | -1.366261000 |
| 6                           | -4.222629000 | -0.623595000 | -1.889014000 | 1 | 1.904416000  | 1.488090000  | -2.352480000 |
| 1                           | -4.332765000 | -1.688278000 | -2.117933000 | 6 | -1.309418000 | 1.664644000  | -2.715353000 |
| 1                           | -5.205027000 | -0.152865000 | -2.011945000 | 1 | -1.348807000 | 0.577147000  | -2.578446000 |
| 1                           | -3.550297000 | -0.188278000 | -2.634945000 | 1 | -2.339767000 | 2.029910000  | -2.642340000 |
| 6                           | -4.851442000 | -1.077735000 | 1.064093000  | 1 | -0.961776000 | 1.855042000  | -3.737380000 |
| 1                           | -5.823843000 | -0.611325000 | 0.865742000  | 8 | 0.730104000  | -0.585558000 | -1.300603000 |
| 1                           | -4.987216000 | -2.160296000 | 0.991040000  | 1 | 0.767439000  | -0.755706000 | 0.988540000  |
| 1                           | -4.579963000 | -0.841979000 | 2.099177000  | 5 | 1.879594000  | -0.804137000 | -0.457132000 |
| 6                           | -3.076335000 | -3.780960000 | -0.616491000 | 8 | 2.720126000  | 0.245613000  | -0.155283000 |
| 1                           | -2.990816000 | -4.842247000 | -0.355637000 | 8 | 2.501677000  | -2.030463000 | -0.425747000 |
| 1                           | -4.130551000 | -3.503964000 | -0.529424000 | 6 | 3.864449000  | -0.351069000 | 0.488326000  |
| 1                           | -2.791120000 | -3.676645000 | -1.670001000 | 6 | 3.902763000  | -1.767626000 | -0.177362000 |
| 6                           | -2.294009000 | -3.080214000 | 2.298365000  | 6 | 4.595193000  | -1.757224000 | -1.538480000 |
| 1                           | -3.317686000 | -2.815574000 | 2.575103000  | 6 | 4.462371000  | -2.872711000 | 0.702106000  |
| 1                           | -2.137355000 | -4.134944000 | 2.552145000  | 6 | 5.079056000  | 0.518857000  | 0.209461000  |
| 1                           | -1.614744000 | -2.484228000 | 2.919646000  | 6 | 3.586866000  | -0.415091000 | 1.990124000  |
| 6                           | -0.203686000 | -3.515596000 | 0.189344000  | 1 | 2.732288000  | -1.062208000 | 2.208570000  |
| 1                           | 0.164767000  | -3.395114000 | -0.833949000 | 1 | 4.459367000  | -0.784580000 | 2.537568000  |
| 1                           | 0.561631000  | -3.117241000 | 0.860074000  | 1 | 4.960463000  | 1.481097000  | 0.716045000  |
| 1                           | -0.278668000 | -4.594148000 | 0.376279000  | 1 | 5.193595000  | 0.708778000  | -0.859567000 |
| 6                           | -0.208569000 | 1.316641000  | 3.007954000  | 1 | 5.989832000  | 0.041996000  | 0.587410000  |
| 1                           | -1.155926000 | 0.761471000  | 2.959682000  | 1 | 4.204486000  | -0.949051000 | -2.165897000 |
| 1                           | 0.606726000  | 0.585943000  | 3.007348000  | 1 | 4.402664000  | -2.709859000 | -2.039816000 |
| 1                           | -0.191566000 | 1.836633000  | 3.972363000  | 1 | 5.677088000  | -1.629308000 | -1.438289000 |

|                         |              |              |              |   |              |              |              |
|-------------------------|--------------|--------------|--------------|---|--------------|--------------|--------------|
| 1                       | 5.498285000  | -2.651981000 | 0.980974000  | 1 | 7.392630000  | -2.983818000 | 0.047318000  |
| 1                       | 4.448505000  | -3.819823000 | 0.155724000  | 6 | 5.411164000  | -3.139552000 | 0.876436000  |
| 1                       | 3.869541000  | -2.993569000 | 1.610696000  | 1 | 5.692404000  | -3.871137000 | 1.627679000  |
| 6                       | 0.526400000  | -1.333542000 | -2.506071000 | 6 | 4.097314000  | -2.685989000 | 0.814826000  |
| 1                       | 0.685551000  | -0.665241000 | -3.355350000 | 1 | 3.366246000  | -3.042024000 | 1.534577000  |
| 1                       | 1.230091000  | -2.166871000 | -2.532567000 | 6 | -2.881323000 | 1.092350000  | 0.288669000  |
| 1                       | -0.501717000 | -1.704048000 | -2.505928000 | 6 | -2.982688000 | 1.840730000  | 1.478028000  |
|                         |              |              |              | 6 | -3.879005000 | 2.910585000  | 1.516279000  |
|                         |              |              |              | 1 | -3.967137000 | 3.495610000  | 2.428404000  |
| <b>2 (in gas phase)</b> |              |              |              | 6 | -4.655226000 | 3.240695000  | 0.413739000  |
| 13                      | -0.000003000 | 0.364678000  | -0.000077000 | 1 | -5.345774000 | 4.077093000  | 0.461545000  |
| 7                       | -1.930189000 | 0.028008000  | 0.224270000  | 6 | -4.537795000 | 2.496566000  | -0.752932000 |
| 7                       | 0.000005000  | -1.480183000 | -0.000155000 | 1 | -5.137582000 | 2.761480000  | -1.619816000 |
| 7                       | 1.930110000  | 0.028164000  | -0.224208000 | 6 | -3.656559000 | 1.418109000  | -0.840009000 |
| 6                       | -2.308502000 | -1.263783000 | 0.172763000  | 6 | -2.166191000 | 1.519829000  | 2.721057000  |
| 6                       | -1.204571000 | -2.156510000 | 0.078498000  | 1 | -1.570788000 | 0.623699000  | 2.515533000  |
| 6                       | -1.206536000 | -3.546165000 | 0.110550000  | 6 | -3.062028000 | 1.209435000  | 3.927323000  |
| 1                       | -2.143994000 | -4.080001000 | 0.223912000  | 1 | -3.736891000 | 0.371390000  | 3.727516000  |
| 6                       | 0.000062000  | -4.245028000 | -0.000525000 | 1 | -3.674115000 | 2.076044000  | 4.199160000  |
| 1                       | 0.000082000  | -5.328705000 | -0.000694000 | 1 | -2.448962000 | 0.949437000  | 4.796418000  |
| 6                       | 1.206609000  | -3.546105000 | -0.111374000 | 6 | -1.203199000 | 2.665444000  | 3.056590000  |
| 1                       | 2.144081000  | -4.079891000 | -0.224876000 | 1 | -0.548346000 | 2.889182000  | 2.209597000  |
| 6                       | 1.204640000  | -2.156430000 | -0.078946000 | 1 | -0.583142000 | 2.403737000  | 3.921103000  |
| 6                       | 2.308511000  | -1.263666000 | -0.173006000 | 1 | -1.757371000 | 3.577499000  | 3.305640000  |
| 6                       | -3.708696000 | -1.734544000 | 0.140843000  | 6 | -3.534204000 | 0.667957000  | -2.155481000 |
| 6                       | -4.681227000 | -1.232202000 | 1.017040000  | 1 | -2.907987000 | -0.214325000 | -1.997335000 |
| 1                       | -4.403036000 | -0.485474000 | 1.752813000  | 6 | -4.897459000 | 0.183245000  | -2.661674000 |
| 6                       | -5.994599000 | -1.681085000 | 0.948253000  | 1 | -5.428868000 | -0.379356000 | -1.887308000 |
| 1                       | -6.732737000 | -1.281566000 | 1.636631000  | 1 | -4.769257000 | -0.466295000 | -3.534148000 |
| 6                       | -6.364960000 | -2.638130000 | 0.004388000  | 1 | -5.529527000 | 1.024352000  | -2.967182000 |
| 1                       | -7.392686000 | -2.983632000 | -0.047864000 | 6 | -2.831863000 | 1.544756000  | -3.199985000 |
| 6                       | -5.411320000 | -3.139084000 | -0.877259000 | 1 | -1.844688000 | 1.859316000  | -2.844646000 |
| 1                       | -5.692684000 | -3.870290000 | -1.628824000 | 1 | -3.416797000 | 2.448062000  | -3.406192000 |
| 6                       | -4.097433000 | -2.685629000 | -0.815563000 | 1 | -2.705440000 | 0.999156000  | -4.141372000 |
| 1                       | -3.366441000 | -3.041363000 | -1.535542000 | 6 | 2.881151000  | 1.092594000  | -0.288367000 |
| 6                       | 3.708703000  | -1.734418000 | -0.141158000 | 6 | 3.656661000  | 1.417960000  | 0.840248000  |
| 6                       | 4.681369000  | -1.231711000 | -1.017007000 | 6 | 4.537978000  | 2.496358000  | 0.753308000  |
| 1                       | 4.403336000  | -0.484600000 | -1.752448000 | 1 | 5.138004000  | 2.760928000  | 1.620131000  |
| 6                       | 5.994712000  | -1.680700000 | -0.948295000 | 6 | 4.655218000  | 3.240844000  | -0.413156000 |
| 1                       | 6.732936000  | -1.280875000 | -1.636405000 | 1 | 5.345865000  | 4.077166000  | -0.460871000 |
| 6                       | 6.364931000  | -2.638227000 | -0.004868000 |   |              |              |              |







|   |              |              |              |   |              |              |              |
|---|--------------|--------------|--------------|---|--------------|--------------|--------------|
| 6 | 2.567196000  | -1.785400000 | 0.099928000  | 1 | -1.746109000 | 1.360719000  | 4.475030000  |
| 6 | -3.229384000 | -3.028924000 | 0.020552000  | 1 | -3.175556000 | 2.204243000  | 3.862879000  |
| 6 | -4.421925000 | -2.670075000 | 0.667399000  | 6 | -2.822150000 | -0.544030000 | -2.153157000 |
| 1 | -4.401138000 | -1.917669000 | 1.446394000  | 1 | -2.087970000 | -1.301307000 | -1.860742000 |
| 6 | -5.629759000 | -3.261636000 | 0.317100000  | 6 | -3.970481000 | -1.249168000 | -2.889112000 |
| 1 | -6.537858000 | -2.965877000 | 0.833547000  | 1 | -4.557458000 | -1.874843000 | -2.211075000 |
| 6 | -5.679403000 | -4.230116000 | -0.684362000 | 1 | -3.578460000 | -1.882450000 | -3.692535000 |
| 1 | -6.624876000 | -4.689900000 | -0.954857000 | 1 | -4.645811000 | -0.516065000 | -3.344972000 |
| 6 | -4.508119000 | -4.590278000 | -1.344251000 | 6 | -2.121714000 | 0.443385000  | -3.092453000 |
| 1 | -4.535292000 | -5.323717000 | -2.144556000 | 1 | -1.318856000 | 0.988832000  | -2.583834000 |
| 6 | -3.301474000 | -3.985786000 | -1.006272000 | 1 | -2.830726000 | 1.184485000  | -3.480460000 |
| 1 | -2.405548000 | -4.221814000 | -1.571941000 | 1 | -1.691501000 | -0.086725000 | -3.950166000 |
| 6 | 4.002599000  | -2.100491000 | -0.077975000 | 6 | 2.803601000  | 0.572414000  | -0.314393000 |
| 6 | 4.822305000  | -1.511808000 | -1.054089000 | 6 | 3.745500000  | 1.161418000  | 0.550013000  |
| 1 | 4.416006000  | -0.781708000 | -1.742931000 | 6 | 4.513174000  | 2.223016000  | 0.065595000  |
| 6 | 6.165477000  | -1.856975000 | -1.145647000 | 1 | 5.249988000  | 2.680435000  | 0.720494000  |
| 1 | 6.781484000  | -1.391184000 | -1.908293000 | 6 | 4.348961000  | 2.705268000  | -1.222097000 |
| 6 | 6.722751000  | -2.786249000 | -0.269311000 | 1 | 4.954870000  | 3.532476000  | -1.579096000 |
| 1 | 7.774498000  | -3.044421000 | -0.343198000 | 6 | 3.391756000  | 2.134246000  | -2.051022000 |
| 6 | 5.923244000  | -3.372065000 | 0.707707000  | 1 | 3.256030000  | 2.534360000  | -3.048937000 |
| 1 | 6.347629000  | -4.084159000 | 1.408477000  | 6 | 2.603195000  | 1.065142000  | -1.624031000 |
| 6 | 4.579078000  | -3.029892000 | 0.805741000  | 6 | 3.980111000  | 0.716640000  | 1.985036000  |
| 1 | 3.970590000  | -3.455564000 | 1.596560000  | 1 | 3.219045000  | -0.030029000 | 2.244124000  |
| 6 | -2.808170000 | -0.134309000 | 0.384150000  | 6 | 3.864527000  | 1.902472000  | 2.962201000  |
| 6 | -3.330545000 | 0.519257000  | 1.520638000  | 1 | 3.024982000  | 2.556339000  | 2.721048000  |
| 6 | -4.364372000 | 1.441053000  | 1.350351000  | 1 | 4.773583000  | 2.512795000  | 2.928976000  |
| 1 | -4.775354000 | 1.941535000  | 2.224046000  | 1 | 3.758489000  | 1.538628000  | 3.989932000  |
| 6 | -4.867516000 | 1.739106000  | 0.092156000  | 6 | 5.372550000  | 0.090670000  | 2.165961000  |
| 1 | -5.668463000 | 2.464437000  | -0.020646000 | 1 | 5.554655000  | -0.742494000 | 1.487281000  |
| 6 | -4.340074000 | 1.098892000  | -1.021694000 | 1 | 5.495169000  | -0.265190000 | 3.194817000  |
| 1 | -4.736712000 | 1.324782000  | -2.009054000 | 1 | 6.144318000  | 0.846738000  | 1.981965000  |
| 6 | -3.321738000 | 0.151431000  | -0.898222000 | 6 | 1.598541000  | 0.431517000  | -2.583149000 |
| 6 | -2.812641000 | 0.266307000  | 2.928026000  | 1 | 0.685738000  | 0.210843000  | -2.015237000 |
| 1 | -1.962480000 | -0.415239000 | 2.860362000  | 6 | 2.098726000  | -0.898208000 | -3.169718000 |
| 6 | -3.871309000 | -0.389652000 | 3.824778000  | 1 | 1.349544000  | -1.301229000 | -3.859791000 |
| 1 | -4.152220000 | -1.384332000 | 3.466885000  | 1 | 2.287402000  | -1.657954000 | -2.406354000 |
| 1 | -4.778939000 | 0.222377000  | 3.874739000  | 1 | 3.024567000  | -0.740278000 | -3.735823000 |
| 1 | -3.485229000 | -0.500375000 | 4.843848000  | 6 | 1.209509000  | 1.363975000  | -3.732838000 |
| 6 | -2.327086000 | 1.573623000  | 3.570723000  | 1 | 0.887805000  | 2.337674000  | -3.354012000 |
| 1 | -1.716714000 | 2.151816000  | 2.871616000  | 1 | 0.389731000  | 0.922603000  | -4.305803000 |

|                             |              |              |              |   |              |              |              |
|-----------------------------|--------------|--------------|--------------|---|--------------|--------------|--------------|
| 1                           | 2.045459000  | 1.508011000  | -4.426547000 | 1 | 2.930064000  | -4.477189000 | -0.732518000 |
| 6                           | 0.738592000  | 1.518098000  | 2.413684000  | 6 | 1.745751000  | -2.799060000 | -0.121865000 |
| 8                           | 0.295054000  | 0.311453000  | 2.294143000  | 6 | 2.675030000  | -1.715136000 | -0.251087000 |
| 8                           | 0.931928000  | 2.306431000  | 1.492976000  | 6 | -3.133562000 | -3.150535000 | 0.039039000  |
| 1                           | 0.948669000  | 1.813165000  | 3.452059000  | 6 | -4.257446000 | -2.868948000 | 0.829973000  |
| 5                           | -0.433777000 | 2.229369000  | -0.132358000 | 1 | -4.179578000 | -2.138430000 | 1.625226000  |
| 8                           | 0.121197000  | 3.032779000  | -1.093094000 | 6 | -5.469787000 | -3.507605000 | 0.600937000  |
| 8                           | -1.497086000 | 2.793431000  | 0.521069000  | 1 | -6.323626000 | -3.271498000 | 1.228498000  |
| 6                           | -0.718269000 | 4.210502000  | -1.172158000 | 6 | -5.592635000 | -4.445674000 | -0.422841000 |
| 6                           | -1.454235000 | 4.205035000  | 0.210779000  | 1 | -6.541750000 | -4.942152000 | -0.599219000 |
| 6                           | 0.170316000  | 5.416914000  | -1.425078000 | 6 | -4.492089000 | -4.727044000 | -1.226752000 |
| 6                           | -1.682428000 | 3.993844000  | -2.336036000 | 1 | -4.579618000 | -5.435223000 | -2.045195000 |
| 6                           | -2.883743000 | 4.722738000  | 0.178577000  | 6 | -3.281855000 | -4.076561000 | -1.007503000 |
| 6                           | -0.665933000 | 4.918415000  | 1.308580000  | 1 | -2.448259000 | -4.252537000 | -1.680391000 |
| 1                           | -0.419169000 | 6.340079000  | -1.410797000 | 6 | 4.121672000  | -1.963286000 | -0.432074000 |
| 1                           | 0.637823000  | 5.323013000  | -2.409903000 | 6 | 4.925088000  | -1.194645000 | -1.288029000 |
| 1                           | 0.962070000  | 5.487113000  | -0.677038000 | 1 | 4.492091000  | -0.373953000 | -1.844212000 |
| 1                           | -2.349524000 | 3.150663000  | -2.129572000 | 6 | 6.280027000  | -1.472924000 | -1.427716000 |
| 1                           | -2.289683000 | 4.885685000  | -2.520272000 | 1 | 6.879652000  | -0.870382000 | -2.102794000 |
| 1                           | -1.109994000 | 3.767718000  | -3.240868000 | 6 | 6.868940000  | -2.508985000 | -0.705713000 |
| 1                           | -2.905761000 | 5.773872000  | -0.129795000 | 1 | 7.928595000  | -2.717791000 | -0.813817000 |
| 1                           | -3.313531000 | 4.646602000  | 1.182179000  | 6 | 6.090811000  | -3.260038000 | 0.170916000  |
| 1                           | -3.505861000 | 4.133149000  | -0.496790000 | 1 | 6.541848000  | -4.051298000 | 0.761686000  |
| 1                           | 0.370765000  | 4.579126000  | 1.342271000  | 6 | 4.735016000  | -2.986425000 | 0.311965000  |
| 1                           | -1.130231000 | 4.693217000  | 2.273825000  | 1 | 4.145177000  | -3.543640000 | 1.032673000  |
| 1                           | -0.688760000 | 6.002687000  | 1.159285000  | 6 | -2.799214000 | -0.271888000 | 0.362954000  |
|                             |              |              |              | 6 | -3.283107000 | 0.347644000  | 1.530789000  |
|                             |              |              |              | 6 | -4.398503000 | 1.179726000  | 1.428672000  |
| <b>2-IM2 (in gas phase)</b> |              |              |              | 1 | -4.789776000 | 1.655730000  | 2.324962000  |
| 1                           | -0.313819000 | 1.096524000  | -0.264483000 | 6 | -5.005142000 | 1.421824000  | 0.204824000  |
| 13                          | 0.174938000  | -0.559355000 | 0.424236000  | 1 | -5.865882000 | 2.081784000  | 0.142849000  |
| 7                           | -1.662417000 | -1.138015000 | 0.443512000  | 6 | -4.502489000 | 0.821667000  | -0.943964000 |
| 7                           | 0.489096000  | -2.356249000 | 0.230608000  | 1 | -4.979770000 | 1.014622000  | -1.901744000 |
| 7                           | 2.101191000  | -0.508999000 | -0.132335000 | 6 | -3.408816000 | -0.042788000 | -0.888025000 |
| 6                           | -1.827957000 | -2.489152000 | 0.248701000  | 6 | -2.636308000 | 0.146321000  | 2.894030000  |
| 6                           | -0.619771000 | -3.194857000 | 0.151718000  | 1 | -1.748267000 | -0.476619000 | 2.757647000  |
| 6                           | -0.398696000 | -4.568571000 | -0.023123000 | 6 | -3.565588000 | -0.572973000 | 3.881592000  |
| 1                           | -1.237194000 | -5.255358000 | 0.022646000  | 1 | -3.795708000 | -1.593826000 | 3.564492000  |
| 6                           | 0.879032000  | -5.040004000 | -0.287653000 | 1 | -4.511015000 | -0.030778000 | 3.994839000  |
| 1                           | 1.043741000  | -6.097781000 | -0.456032000 | 1 | -3.093253000 | -0.631736000 | 4.868142000  |
| 6                           | 1.955682000  | -4.134790000 | -0.403530000 |   |              |              |              |





|   |              |              |              |   |              |              |              |
|---|--------------|--------------|--------------|---|--------------|--------------|--------------|
| 1 | 0.827030000  | -6.000232000 | -1.065447000 | 1 | -3.353573000 | -1.780164000 | 3.581506000  |
| 6 | 1.795696000  | -4.091942000 | -0.923993000 | 1 | -4.072159000 | -0.287397000 | 4.212211000  |
| 1 | 2.767071000  | -4.471042000 | -1.222150000 | 6 | -1.873255000 | 1.357533000  | 3.568404000  |
| 6 | 1.660078000  | -2.730013000 | -0.602419000 | 1 | -1.490822000 | 2.067002000  | 2.829966000  |
| 6 | 2.654462000  | -1.748008000 | -0.527723000 | 1 | -1.096021000 | 1.140972000  | 4.311030000  |
| 6 | -3.233625000 | -3.083205000 | -0.048243000 | 1 | -2.694529000 | 1.855822000  | 4.096661000  |
| 6 | -4.238937000 | -2.882664000 | 0.907730000  | 6 | -3.490411000 | -0.610761000 | -2.072805000 |
| 1 | -4.065531000 | -2.199786000 | 1.729918000  | 1 | -2.771269000 | -1.425069000 | -1.971034000 |
| 6 | -5.457467000 | -3.543128000 | 0.808819000  | 6 | -4.780240000 | -1.210832000 | -2.646720000 |
| 1 | -6.218077000 | -3.375282000 | 1.564856000  | 1 | -5.291245000 | -1.834593000 | -1.906481000 |
| 6 | -5.704345000 | -4.413619000 | -0.251553000 | 1 | -4.549490000 | -1.830534000 | -3.519623000 |
| 1 | -6.658429000 | -4.925826000 | -0.327506000 | 1 | -5.474163000 | -0.429218000 | -2.975168000 |
| 6 | -4.724167000 | -4.607789000 | -1.220247000 | 6 | -2.867204000 | 0.390883000  | -3.049254000 |
| 1 | -4.912357000 | -5.263258000 | -2.064987000 | 1 | -1.856885000 | 0.656284000  | -2.725431000 |
| 6 | -3.506076000 | -3.942533000 | -1.125742000 | 1 | -3.465207000 | 1.308170000  | -3.115242000 |
| 1 | -2.766515000 | -4.059399000 | -1.911373000 | 1 | -2.798864000 | -0.044040000 | -4.052331000 |
| 6 | 4.092407000  | -2.078157000 | -0.614704000 | 6 | 2.974519000  | 0.611461000  | 0.015425000  |
| 6 | 5.019190000  | -1.254105000 | -1.273256000 | 6 | 3.651306000  | 0.634480000  | 1.261294000  |
| 1 | 4.685388000  | -0.335328000 | -1.736877000 | 6 | 4.299185000  | 1.813040000  | 1.650200000  |
| 6 | 6.365717000  | -1.595992000 | -1.333925000 | 1 | 4.817072000  | 1.839902000  | 2.606450000  |
| 1 | 7.057399000  | -0.941312000 | -1.855634000 | 6 | 4.297157000  | 2.937011000  | 0.842553000  |
| 6 | 6.829531000  | -2.763725000 | -0.731736000 | 1 | 4.795039000  | 3.846377000  | 1.165047000  |
| 1 | 7.881894000  | -3.025754000 | -0.779458000 | 6 | 3.666259000  | 2.889627000  | -0.396788000 |
| 6 | 5.930578000  | -3.577304000 | -0.047392000 | 1 | 3.688825000  | 3.774255000  | -1.021506000 |
| 1 | 6.280056000  | -4.472857000 | 0.457883000  | 6 | 3.005002000  | 1.744910000  | -0.842850000 |
| 6 | 4.585871000  | -3.231309000 | 0.022871000  | 6 | 3.776604000  | -0.576043000 | 2.186839000  |
| 1 | 3.908779000  | -3.836459000 | 0.617513000  | 1 | 3.237058000  | -1.415782000 | 1.744341000  |
| 6 | -2.897131000 | -0.235768000 | 0.413025000  | 6 | 3.192006000  | -0.364147000 | 3.592444000  |
| 6 | -3.183804000 | 0.340122000  | 1.666300000  | 1 | 2.099216000  | -0.381042000 | 3.587378000  |
| 6 | -4.304704000 | 1.164436000  | 1.783900000  | 1 | 3.537396000  | 0.576456000  | 4.038341000  |
| 1 | -4.539308000 | 1.601642000  | 2.751516000  | 1 | 3.520851000  | -1.174707000 | 4.251133000  |
| 6 | -5.127047000 | 1.421909000  | 0.697175000  | 6 | 5.258836000  | -0.965355000 | 2.323000000  |
| 1 | -5.997474000 | 2.062518000  | 0.806245000  | 1 | 5.755364000  | -1.024348000 | 1.351556000  |
| 6 | -4.829573000 | 0.850917000  | -0.534047000 | 1 | 5.352322000  | -1.937666000 | 2.818342000  |
| 1 | -5.475731000 | 1.052227000  | -1.384503000 | 1 | 5.792429000  | -0.226655000 | 2.932936000  |
| 6 | -3.726147000 | 0.013454000  | -0.703261000 | 6 | 2.322134000  | 1.738352000  | -2.215229000 |
| 6 | -2.354697000 | 0.056971000  | 2.910164000  | 1 | 1.256642000  | 1.544303000  | -2.040814000 |
| 1 | -1.479947000 | -0.521704000 | 2.608330000  | 6 | 2.838971000  | 0.648857000  | -3.167263000 |
| 6 | -3.127592000 | -0.774158000 | 3.944878000  | 1 | 2.275585000  | 0.693012000  | -4.105662000 |
| 1 | -2.533908000 | -0.881093000 | 4.859159000  | 1 | 2.727724000  | -0.356990000 | -2.759661000 |







|   |              |              |              |    |              |              |              |
|---|--------------|--------------|--------------|----|--------------|--------------|--------------|
| 6 | 2.476212000  | -0.539923000 | 2.907891000  | 1  | 3.100899000  | 0.341101000  | 2.736668000  |
| 6 | 2.743887000  | 0.029957000  | 0.202018000  | 1  | 4.554474000  | 2.745517000  | -0.740647000 |
| 6 | 3.038770000  | 1.385901000  | -0.048806000 | 1  | 6.223270000  | 0.985934000  | -1.186580000 |
| 6 | 4.303588000  | 1.708904000  | -0.539368000 | 1  | 5.658867000  | -1.384559000 | -0.800241000 |
| 6 | 5.245320000  | 0.717375000  | -0.798363000 | 1  | 2.422728000  | -2.546136000 | 0.683515000  |
| 6 | 4.926245000  | -0.613964000 | -0.575720000 | 1  | 4.131761000  | -4.195922000 | 1.184911000  |
| 6 | 3.676122000  | -0.986449000 | -0.070284000 | 1  | 5.382972000  | -3.271507000 | 0.353386000  |
| 6 | 3.364163000  | -2.462449000 | 0.130422000  | 1  | 4.700036000  | -2.659081000 | 1.863144000  |
| 6 | 4.456995000  | -3.181539000 | 0.932059000  | 1  | 2.945704000  | -4.223546000 | -1.071729000 |
| 6 | 3.165895000  | -3.160750000 | -1.220339000 | 1  | 2.333642000  | -2.722684000 | -1.778394000 |
| 6 | 1.980813000  | 2.455202000  | 0.179260000  | 1  | 4.070888000  | -3.082324000 | -1.834081000 |
| 6 | 2.188386000  | 3.699262000  | -0.685532000 | 1  | 1.022634000  | 2.009036000  | -0.111810000 |
| 6 | 1.863414000  | 2.855893000  | 1.655934000  | 1  | 1.310270000  | 4.349754000  | -0.615667000 |
| 6 | -0.021120000 | 0.171339000  | -2.346951000 | 1  | 2.336294000  | 3.442687000  | -1.739772000 |
| 1 | 1.341037000  | 0.504076000  | -4.014694000 | 1  | 3.051711000  | 4.286189000  | -0.351756000 |
| 1 | -0.887497000 | -0.370168000 | -4.276136000 | 1  | 1.161838000  | 3.690998000  | 1.764679000  |
| 1 | -1.931284000 | -0.765869000 | -2.903077000 | 1  | 1.496236000  | 2.034244000  | 2.278290000  |
| 1 | -0.514417000 | -1.772476000 | -3.259978000 | 1  | 2.834103000  | 3.181746000  | 2.047972000  |
| 1 | 0.030018000  | -1.031578000 | 3.640959000  | 6  | -0.885032000 | -0.739837000 | -3.237291000 |
| 1 | -1.064656000 | 2.077758000  | 0.314318000  | 1  | 1.894569000  | -0.768693000 | -2.920427000 |
| 1 | -1.560618000 | 3.516018000  | 2.338398000  | 1  | 2.045029000  | 0.925734000  | -2.446391000 |
| 1 | -3.214181000 | 2.879754000  | 2.331979000  | 6  | 1.391022000  | 0.206770000  | -2.953580000 |
| 1 | -1.837627000 | 1.796011000  | 2.614911000  | 6  | -0.615219000 | 1.579811000  | -2.446667000 |
| 1 | -1.445942000 | 4.439527000  | 0.037663000  | 1  | -0.590636000 | 1.927906000  | -3.493329000 |
| 1 | -3.196923000 | 4.267363000  | 0.119340000  | 1  | -0.067076000 | 2.323300000  | -1.854702000 |
| 1 | -2.313367000 | 3.644852000  | -1.287316000 | 1  | -1.663488000 | 1.600382000  | -2.128344000 |
| 1 | -4.564825000 | 2.710522000  | -0.599650000 | 1  | -2.818198000 | -1.804315000 | 2.795879000  |
| 1 | -6.119986000 | 0.946156000  | -1.340261000 | 13 | 0.021935000  | -0.734122000 | -0.551919000 |
| 1 | -5.509996000 | -1.432508000 | -1.085451000 |    |              |              |              |
| 1 | -2.337188000 | -2.604239000 | 0.529515000  |    |              |              |              |
| 1 | -4.605222000 | -2.682253000 | 1.719360000  | 8  | 0.014260000  | -2.682037000 | 0.821097000  |
| 1 | -4.073075000 | -4.234331000 | 1.042460000  | 7  | -1.404356000 | -0.101136000 | 0.726269000  |
| 1 | -5.309855000 | -3.284324000 | 0.215042000  | 6  | -2.715879000 | 0.192431000  | 0.204279000  |
| 1 | -2.904964000 | -4.293109000 | -1.207754000 | 6  | -3.063176000 | 1.547438000  | 0.012808000  |
| 1 | -3.989797000 | -3.128000000 | -1.988393000 | 6  | -4.307128000 | 1.830415000  | -0.551148000 |
| 1 | -2.245089000 | -2.815333000 | -1.921386000 | 6  | -5.177037000 | 0.808883000  | -0.920700000 |
| 1 | -3.248790000 | -0.100279000 | 2.622809000  | 6  | -4.821745000 | -0.514566000 | -0.708748000 |
| 1 | -2.164032000 | -0.617717000 | 3.935223000  | 6  | -3.593468000 | -0.851726000 | -0.130482000 |
| 1 | 2.167926000  | -0.561029000 | 3.953801000  | 6  | -3.262170000 | -2.312950000 | 0.130386000  |
| 1 | 3.099059000  | -1.419406000 | 2.711284000  | 6  | -4.371961000 | -3.000632000 | 0.937072000  |

**3-TS1 (in gas phase)**

|   |              |              |              |    |              |              |              |
|---|--------------|--------------|--------------|----|--------------|--------------|--------------|
| 6 | -3.014858000 | -3.076639000 | -1.176687000 | 1  | -1.625650000 | 3.850247000  | 2.184456000  |
| 6 | -2.120925000 | 2.671331000  | 0.428837000  | 1  | -1.850811000 | 2.138544000  | 2.544501000  |
| 6 | -2.340626000 | 3.971358000  | -0.349735000 | 1  | -3.261135000 | 3.166838000  | 2.214765000  |
| 6 | -2.221050000 | 2.965671000  | 1.934165000  | 1  | 0.033858000  | -0.462677000 | 3.724965000  |
| 6 | -1.233633000 | -0.260217000 | 2.044444000  | 1  | 5.703282000  | -1.064423000 | -0.701125000 |
| 6 | 0.024260000  | -0.316816000 | 2.652978000  | 1  | 6.203546000  | 1.300566000  | -1.196587000 |
| 6 | 1.269957000  | -0.144827000 | 2.037677000  | 1  | 4.479465000  | 3.029469000  | -0.852525000 |
| 7 | 1.435057000  | -0.026639000 | 0.714378000  | 1  | 0.963007000  | 2.233225000  | -0.212722000 |
| 6 | 2.741290000  | 0.309401000  | 0.200911000  | 1  | 1.184521000  | 4.531038000  | -0.863675000 |
| 6 | 3.703478000  | -0.691100000 | -0.011412000 | 1  | 2.927339000  | 4.540376000  | -0.590936000 |
| 6 | 4.947131000  | -0.304945000 | -0.522146000 | 1  | 2.245483000  | 3.586787000  | -1.924864000 |
| 6 | 5.229853000  | 1.022282000  | -0.805366000 | 1  | 1.039087000  | 4.008827000  | 1.558569000  |
| 6 | 4.257273000  | 1.996826000  | -0.604114000 | 1  | 2.738978000  | 3.600461000  | 1.857674000  |
| 6 | 2.997166000  | 1.660740000  | -0.111856000 | 1  | 1.459420000  | 2.408795000  | 2.177428000  |
| 6 | 1.911777000  | 2.714808000  | 0.051269000  | 1  | 2.473392000  | -2.253665000 | 0.773369000  |
| 6 | 2.084534000  | 3.908030000  | -0.890801000 | 1  | 4.224897000  | -3.818359000 | 1.408557000  |
| 6 | 1.781619000  | 3.204813000  | 1.499880000  | 1  | 5.474974000  | -2.851549000 | 0.621319000  |
| 6 | 3.434159000  | -2.163108000 | 0.256424000  | 1  | 4.674266000  | -2.234550000 | 2.069244000  |
| 6 | 4.514004000  | -2.796951000 | 1.143982000  | 1  | 3.071203000  | -3.984843000 | -0.876675000 |
| 6 | 3.336372000  | -2.940337000 | -1.064830000 | 1  | 4.295080000  | -2.911447000 | -1.595566000 |
| 6 | 2.480494000  | -0.086564000 | 2.934452000  | 1  | 2.571123000  | -2.524515000 | -1.726335000 |
| 6 | -2.441536000 | -0.405323000 | 2.934820000  | 1  | 3.122610000  | 0.761609000  | 2.682484000  |
| 6 | -0.082301000 | 0.345707000  | -2.339512000 | 1  | 3.076680000  | -0.995284000 | 2.801454000  |
| 6 | -0.959107000 | -0.613799000 | -3.165751000 | 1  | 2.181779000  | -0.015943000 | 3.980433000  |
| 6 | -0.674937000 | 1.748906000  | -2.516559000 | 1  | -2.180195000 | -0.217219000 | 3.976894000  |
| 6 | 1.330723000  | 0.331970000  | -2.947616000 | 1  | -2.807353000 | -1.435872000 | 2.851884000  |
| 1 | -4.599089000 | 2.862314000  | -0.716893000 | 1  | -3.255888000 | 0.258657000  | 2.638139000  |
| 1 | -6.135225000 | 1.050090000  | -1.370512000 | 1  | -0.584969000 | -1.644896000 | -3.148336000 |
| 1 | -5.509460000 | -1.307526000 | -0.989936000 | 1  | -0.973357000 | -0.290350000 | -4.218078000 |
| 1 | -2.339762000 | -2.362889000 | 0.715991000  | 1  | -1.999614000 | -0.620254000 | -2.814823000 |
| 1 | -4.054251000 | -4.007482000 | 1.224280000  | 1  | -0.132388000 | 2.525013000  | -1.963372000 |
| 1 | -4.620321000 | -2.443225000 | 1.846137000  | 1  | -0.640421000 | 2.032313000  | -3.580513000 |
| 1 | -5.290265000 | -3.099589000 | 0.348230000  | 1  | -1.725384000 | 1.779973000  | -2.207959000 |
| 1 | -2.744800000 | -4.115680000 | -0.965410000 | 1  | 1.988830000  | 1.081414000  | -2.493127000 |
| 1 | -2.195864000 | -2.640452000 | -1.754903000 | 1  | 1.823773000  | -0.643389000 | -2.844130000 |
| 1 | -3.912427000 | -3.068079000 | -1.806503000 | 1  | 1.274351000  | 0.551892000  | -4.025117000 |
| 1 | -1.096615000 | 2.332459000  | 0.229491000  | 1  | 0.324377000  | -2.011378000 | -1.117585000 |
| 1 | -1.520797000 | 4.665739000  | -0.138049000 | 6  | 0.164177000  | -3.053010000 | -0.339640000 |
| 1 | -2.378332000 | 3.805881000  | -1.429893000 | 8  | 0.216705000  | -4.042144000 | -1.018417000 |
| 1 | -3.269160000 | 4.466775000  | -0.044839000 | 13 | 0.018862000  | -0.387761000 | -0.480688000 |

| 3-TS1 (in benzene solvent) |              |              |              | 1 | -2.344512000 | -2.358794000 | 0.705985000  |
|----------------------------|--------------|--------------|--------------|---|--------------|--------------|--------------|
| 8                          | 0.028476000  | -2.740970000 | 0.800802000  | 1 | -4.052667000 | -4.000247000 | 1.238912000  |
| 7                          | -1.408035000 | -0.095315000 | 0.725331000  | 1 | -4.619212000 | -2.438081000 | 1.860132000  |
| 6                          | -2.723245000 | 0.199901000  | 0.209490000  | 1 | -5.298483000 | -3.100572000 | 0.368686000  |
| 6                          | -3.071374000 | 1.555653000  | 0.020175000  | 1 | -2.784888000 | -4.104891000 | -0.981623000 |
| 6                          | -4.320698000 | 1.839883000  | -0.532502000 | 1 | -2.230127000 | -2.627217000 | -1.765315000 |
| 6                          | -5.195718000 | 0.819632000  | -0.893750000 | 1 | -3.950673000 | -3.042761000 | -1.802915000 |
| 6                          | -4.839465000 | -0.504341000 | -0.685597000 | 1 | -1.103806000 | 2.348881000  | 0.218563000  |
| 6                          | -3.605332000 | -0.842862000 | -0.119781000 | 1 | -1.539191000 | 4.677914000  | -0.146420000 |
| 6                          | -3.274456000 | -2.305774000 | 0.132609000  | 1 | -2.415856000 | 3.821347000  | -1.425663000 |
| 6                          | -4.375222000 | -2.995039000 | 0.949356000  | 1 | -3.285279000 | 4.477974000  | -0.026505000 |
| 6                          | -3.046818000 | -3.061244000 | -1.181859000 | 1 | -1.617839000 | 3.856741000  | 2.184445000  |
| 6                          | -2.128225000 | 2.682087000  | 0.428714000  | 1 | -1.837392000 | 2.143968000  | 2.541357000  |
| 6                          | -2.361347000 | 3.982325000  | -0.345021000 | 1 | -3.250602000 | 3.171703000  | 2.229624000  |
| 6                          | -2.213905000 | 2.971867000  | 1.935265000  | 1 | 0.037615000  | -0.476515000 | 3.718931000  |
| 6                          | -1.232823000 | -0.264872000 | 2.043401000  | 1 | 5.711740000  | -1.108685000 | -0.664331000 |
| 6                          | 0.027320000  | -0.328370000 | 2.647191000  | 1 | 6.239893000  | 1.250148000  | -1.162686000 |
| 6                          | 1.273575000  | -0.155618000 | 2.033736000  | 1 | 4.530537000  | 2.996624000  | -0.841863000 |
| 7                          | 1.439102000  | -0.026279000 | 0.709297000  | 1 | 0.999309000  | 2.254537000  | -0.226752000 |
| 6                          | 2.751741000  | 0.297665000  | 0.200649000  | 1 | 1.270539000  | 4.555484000  | -0.856891000 |
| 6                          | 3.706803000  | -0.713085000 | 0.000412000  | 1 | 3.008765000  | 4.529117000  | -0.569801000 |
| 6                          | 4.960389000  | -0.341748000 | -0.497416000 | 1 | 2.321976000  | 3.601975000  | -1.918290000 |
| 6                          | 5.259003000  | 0.982109000  | -0.781779000 | 1 | 1.105976000  | 4.026415000  | 1.556939000  |
| 6                          | 4.294029000  | 1.967009000  | -0.593615000 | 1 | 2.784663000  | 3.561271000  | 1.876165000  |
| 6                          | 3.025425000  | 1.646117000  | -0.110912000 | 1 | 1.464764000  | 2.408283000  | 2.168246000  |
| 6                          | 1.954905000  | 2.716778000  | 0.048957000  | 1 | 2.457998000  | -2.256577000 | 0.789385000  |
| 6                          | 2.157480000  | 3.913712000  | -0.881532000 | 1 | 4.180189000  | -3.853329000 | 1.412391000  |
| 6                          | 1.821288000  | 3.198023000  | 1.500015000  | 1 | 5.444104000  | -2.921980000 | 0.606470000  |
| 6                          | 3.416119000  | -2.181335000 | 0.266166000  | 1 | 4.676674000  | -2.281078000 | 2.063246000  |
| 6                          | 4.490852000  | -2.839703000 | 1.140162000  | 1 | 3.005315000  | -3.988861000 | -0.872252000 |
| 6                          | 3.291202000  | -2.948826000 | -1.057114000 | 1 | 4.246159000  | -2.941552000 | -1.595983000 |
| 6                          | 2.481383000  | -0.108372000 | 2.932301000  | 1 | 2.532573000  | -2.512244000 | -1.713772000 |
| 6                          | -2.434024000 | -0.411611000 | 2.939967000  | 1 | 3.128416000  | 0.739606000  | 2.691893000  |
| 6                          | -0.074629000 | 0.367037000  | -2.350147000 | 1 | 3.074552000  | -1.019540000 | 2.798235000  |
| 6                          | -0.956621000 | -0.591266000 | -3.170477000 | 1 | 2.179820000  | -0.044074000 | 3.978168000  |
| 6                          | -0.662009000 | 1.772871000  | -2.523151000 | 1 | -2.167822000 | -0.212522000 | 3.979117000  |
| 6                          | 1.336276000  | 0.347621000  | -2.960140000 | 1 | -2.790321000 | -1.447180000 | 2.872364000  |
| 1                          | -4.613454000 | 2.872281000  | -0.694248000 | 1 | -3.257792000 | 0.242522000  | 2.647049000  |
| 1                          | -6.158325000 | 1.062169000  | -1.333842000 | 1 | -0.585243000 | -1.623464000 | -3.155429000 |
| 1                          | -5.530552000 | -1.296657000 | -0.960572000 | 1 | -0.975093000 | -0.269609000 | -4.223597000 |

|                             |              |              |              |   |              |              |              |
|-----------------------------|--------------|--------------|--------------|---|--------------|--------------|--------------|
| 1                           | -1.996366000 | -0.597547000 | -2.817657000 | 6 | 2.118912000  | 3.913812000  | -0.678707000 |
| 1                           | -0.109389000 | 2.546852000  | -1.976585000 | 6 | 1.828416000  | 3.069174000  | 1.666473000  |
| 1                           | -0.637036000 | 2.055600000  | -3.587892000 | 6 | 3.406761000  | -2.229252000 | 0.118346000  |
| 1                           | -1.709354000 | 1.811695000  | -2.205236000 | 6 | 4.500585000  | -2.906236000 | 0.955844000  |
| 1                           | 2.000732000  | 1.090446000  | -2.503661000 | 6 | 3.270826000  | -2.950388000 | -1.229917000 |
| 1                           | 1.823753000  | -0.631601000 | -2.865902000 | 6 | 2.489175000  | -0.287697000 | 2.893539000  |
| 1                           | 1.280870000  | 0.575249000  | -4.036592000 | 6 | -2.430942000 | -0.620196000 | 2.889654000  |
| 1                           | 0.260406000  | -1.999416000 | -1.110014000 | 6 | -0.070502000 | 0.493987000  | -2.331399000 |
| 6                           | 0.133655000  | -3.039257000 | -0.387331000 | 6 | -0.981169000 | -0.378591000 | -3.219114000 |
| 8                           | 0.157614000  | -4.015934000 | -1.097389000 | 6 | -0.630336000 | 1.918344000  | -2.410395000 |
| 13                          | 0.014965000  | -0.336863000 | -0.482490000 | 6 | 1.334054000  | 0.488865000  | -2.961362000 |
|                             |              |              |              | 1 | -4.565305000 | 2.894870000  | -0.557615000 |
|                             |              |              |              | 1 | -6.105503000 | 1.140343000  | -1.346860000 |
|                             |              |              |              | 1 | -5.493413000 | -1.241391000 | -1.123738000 |
|                             |              |              |              | 1 | -2.326833000 | -2.419958000 | 0.505387000  |
|                             |              |              |              | 1 | -4.054617000 | -4.068348000 | 0.981007000  |
|                             |              |              |              | 1 | -4.570127000 | -2.527889000 | 1.697499000  |
|                             |              |              |              | 1 | -5.297589000 | -3.092437000 | 0.189515000  |
|                             |              |              |              | 1 | -2.848886000 | -4.089229000 | -1.252793000 |
|                             |              |              |              | 1 | -2.259531000 | -2.581659000 | -1.976493000 |
|                             |              |              |              | 1 | -3.992198000 | -2.964284000 | -2.004730000 |
|                             |              |              |              | 1 | -1.075486000 | 2.279422000  | 0.379945000  |
|                             |              |              |              | 1 | -1.484233000 | 4.637487000  | 0.175039000  |
|                             |              |              |              | 1 | -2.336938000 | 3.877325000  | -1.180432000 |
|                             |              |              |              | 1 | -3.234438000 | 4.442486000  | 0.242510000  |
|                             |              |              |              | 1 | -1.605335000 | 3.658710000  | 2.432029000  |
|                             |              |              |              | 1 | -1.857833000 | 1.930001000  | 2.671307000  |
|                             |              |              |              | 1 | -3.250600000 | 2.998345000  | 2.399904000  |
|                             |              |              |              | 1 | 0.044597000  | -0.700665000 | 3.674905000  |
|                             |              |              |              | 1 | 5.670388000  | -1.109108000 | -0.826533000 |
|                             |              |              |              | 1 | 6.193752000  | 1.273164000  | -1.199957000 |
|                             |              |              |              | 1 | 4.498477000  | 3.001100000  | -0.729700000 |
|                             |              |              |              | 1 | 0.981821000  | 2.212377000  | -0.092614000 |
|                             |              |              |              | 1 | 1.227812000  | 4.545759000  | -0.604279000 |
|                             |              |              |              | 1 | 2.973240000  | 4.515152000  | -0.348582000 |
|                             |              |              |              | 1 | 2.265440000  | 3.655305000  | -1.732315000 |
|                             |              |              |              | 1 | 1.099741000  | 3.880120000  | 1.779922000  |
|                             |              |              |              | 1 | 2.794743000  | 3.426765000  | 2.040238000  |
|                             |              |              |              | 1 | 1.496629000  | 2.238822000  | 2.296235000  |
|                             |              |              |              | 1 | 2.458293000  | -2.332510000 | 0.655510000  |
|                             |              |              |              |   |              |              |              |
| <b>3-IM1 (in gas phase)</b> |              |              |              |   |              |              |              |
| 8                           | 0.108357000  | -2.160634000 | -1.043516000 |   |              |              |              |
| 6                           | 0.115112000  | -3.179720000 | -0.223680000 |   |              |              |              |
| 8                           | 0.041291000  | -3.123909000 | 0.987336000  |   |              |              |              |
| 7                           | -1.395628000 | -0.172990000 | 0.703016000  |   |              |              |              |
| 6                           | -2.702222000 | 0.157886000  | 0.197697000  |   |              |              |              |
| 6                           | -3.043473000 | 1.524686000  | 0.094624000  |   |              |              |              |
| 6                           | -4.280516000 | 1.852227000  | -0.459965000 |   |              |              |              |
| 6                           | -5.152465000 | 0.863707000  | -0.906563000 |   |              |              |              |
| 6                           | -4.804407000 | -0.472743000 | -0.783378000 |   |              |              |              |
| 6                           | -3.582072000 | -0.853795000 | -0.220167000 |   |              |              |              |
| 6                           | -3.264530000 | -2.331010000 | -0.052160000 |   |              |              |              |
| 6                           | -4.360385000 | -3.042118000 | 0.754444000  |   |              |              |              |
| 6                           | -3.076759000 | -3.028101000 | -1.405260000 |   |              |              |              |
| 6                           | -2.098859000 | 2.611514000  | 0.594759000  |   |              |              |              |
| 6                           | -2.306333000 | 3.964792000  | -0.091112000 |   |              |              |              |
| 6                           | -2.210405000 | 2.802041000  | 2.115992000  |   |              |              |              |
| 6                           | -1.225709000 | -0.406397000 | 2.008134000  |   |              |              |              |
| 6                           | 0.031482000  | -0.487375000 | 2.614296000  |   |              |              |              |
| 6                           | 1.272994000  | -0.287906000 | 2.000171000  |   |              |              |              |
| 7                           | 1.427868000  | -0.101769000 | 0.685074000  |   |              |              |              |
| 6                           | 2.733419000  | 0.247186000  | 0.185605000  |   |              |              |              |
| 6                           | 3.683570000  | -0.749305000 | -0.091333000 |   |              |              |              |
| 6                           | 4.925328000  | -0.351840000 | -0.597633000 |   |              |              |              |
| 6                           | 5.221765000  | 0.985366000  | -0.811302000 |   |              |              |              |
| 6                           | 4.265347000  | 1.958541000  | -0.539219000 |   |              |              |              |
| 6                           | 3.006825000  | 1.610790000  | -0.050946000 |   |              |              |              |
| 6                           | 1.938131000  | 2.666795000  | 0.189274000  |   |              |              |              |



|                                   |              |              |              |   |              |              |              |
|-----------------------------------|--------------|--------------|--------------|---|--------------|--------------|--------------|
| 1                                 | 4.204809000  | -3.931455000 | 1.198735000  | 6 | -2.234967000 | 2.811009000  | 2.109054000  |
| 1                                 | 5.446564000  | -2.957671000 | 0.406169000  | 6 | -1.228498000 | -0.400490000 | 2.004507000  |
| 1                                 | 4.692626000  | -2.373615000 | 1.892404000  | 6 | 0.030189000  | -0.486010000 | 2.608625000  |
| 1                                 | 3.050730000  | -4.012314000 | -1.070670000 | 6 | 1.273774000  | -0.284523000 | 1.997781000  |
| 1                                 | 4.206211000  | -2.882336000 | -1.797027000 | 7 | 1.431122000  | -0.095385000 | 0.682671000  |
| 1                                 | 2.467897000  | -2.522542000 | -1.835356000 | 6 | 2.741304000  | 0.241847000  | 0.185836000  |
| 1                                 | 3.144451000  | 0.560127000  | 2.677312000  | 6 | 3.684559000  | -0.764127000 | -0.084853000 |
| 1                                 | 3.070246000  | -1.199661000 | 2.720643000  | 6 | 4.933972000  | -0.379191000 | -0.582843000 |
| 1                                 | 2.194952000  | -0.257950000 | 3.942920000  | 6 | 5.243682000  | 0.955280000  | -0.797389000 |
| 1                                 | -2.179756000 | -0.453122000 | 3.938056000  | 6 | 4.294079000  | 1.937759000  | -0.533687000 |
| 1                                 | -2.754026000 | -1.662243000 | 2.777055000  | 6 | 3.029744000  | 1.603005000  | -0.049429000 |
| 1                                 | -3.269272000 | 0.020894000  | 2.610029000  | 6 | 1.975778000  | 2.673155000  | 0.196332000  |
| 1                                 | -0.620893000 | -1.409748000 | -3.290942000 | 6 | 2.168448000  | 3.917543000  | -0.672103000 |
| 1                                 | -1.016281000 | 0.036707000  | -4.239024000 | 6 | 1.885869000  | 3.077600000  | 1.674071000  |
| 1                                 | -2.013824000 | -0.402791000 | -2.844246000 | 6 | 3.391752000  | -2.241792000 | 0.121690000  |
| 1                                 | -0.076718000 | 2.643684000  | -1.802492000 | 6 | 4.471501000  | -2.933183000 | 0.964518000  |
| 1                                 | -0.588692000 | 2.277644000  | -3.451423000 | 6 | 3.257494000  | -2.958750000 | -1.228114000 |
| 1                                 | -1.681266000 | 1.948980000  | -2.102156000 | 6 | 2.485640000  | -0.289921000 | 2.895311000  |
| 1                                 | 2.016762000  | 1.187475000  | -2.463870000 | 6 | -2.430000000 | -0.611789000 | 2.890392000  |
| 1                                 | 1.803333000  | -0.503486000 | -2.931672000 | 6 | -0.067549000 | 0.519340000  | -2.332085000 |
| 1                                 | 1.272811000  | 0.786679000  | -4.020565000 | 6 | -0.977023000 | -0.345328000 | -3.227023000 |
| 1                                 | 0.196426000  | -4.145698000 | -0.753518000 | 6 | -0.625161000 | 1.944728000  | -2.396989000 |
| 13                                | 0.010327000  | -0.417712000 | -0.558715000 | 6 | 1.335340000  | 0.519858000  | -2.963458000 |
|                                   |              |              |              | 1 | -4.600339000 | 2.880457000  | -0.550199000 |
|                                   |              |              |              | 1 | -6.133120000 | 1.113856000  | -1.327000000 |
|                                   |              |              |              | 1 | -5.502751000 | -1.263734000 | -1.102684000 |
|                                   |              |              |              | 1 | -2.322294000 | -2.414351000 | 0.517003000  |
|                                   |              |              |              | 1 | -4.030337000 | -4.074767000 | 1.001899000  |
|                                   |              |              |              | 1 | -4.574895000 | -2.537531000 | 1.699850000  |
|                                   |              |              |              | 1 | -5.282594000 | -3.128208000 | 0.191376000  |
|                                   |              |              |              | 1 | -2.821032000 | -4.091904000 | -1.239522000 |
|                                   |              |              |              | 1 | -2.250177000 | -2.580080000 | -1.967932000 |
|                                   |              |              |              | 1 | -3.977261000 | -2.983442000 | -1.995058000 |
|                                   |              |              |              | 1 | -1.100407000 | 2.299158000  | 0.369443000  |
|                                   |              |              |              | 1 | -1.533135000 | 4.650509000  | 0.154252000  |
|                                   |              |              |              | 1 | -2.398881000 | 3.884095000  | -1.187486000 |
|                                   |              |              |              | 1 | -3.280328000 | 4.443449000  | 0.246186000  |
|                                   |              |              |              | 1 | -1.648789000 | 3.681987000  | 2.422524000  |
|                                   |              |              |              | 1 | -1.860051000 | 1.949041000  | 2.666283000  |
|                                   |              |              |              | 1 | -3.277141000 | 2.984892000  | 2.401122000  |
| <b>3-IMI (in benzene solvent)</b> |              |              |              |   |              |              |              |
| 8                                 | 0.100478000  | -2.137312000 | -1.060817000 |   |              |              |              |
| 6                                 | 0.097835000  | -3.178647000 | -0.272279000 |   |              |              |              |
| 8                                 | 0.038681000  | -3.162310000 | 0.941588000  |   |              |              |              |
| 7                                 | -1.399895000 | -0.164065000 | 0.699171000  |   |              |              |              |
| 6                                 | -2.710383000 | 0.158449000  | 0.196579000  |   |              |              |              |
| 6                                 | -3.062709000 | 1.522916000  | 0.092936000  |   |              |              |              |
| 6                                 | -4.306331000 | 1.840087000  | -0.454668000 |   |              |              |              |
| 6                                 | -5.174595000 | 0.844612000  | -0.893511000 |   |              |              |              |
| 6                                 | -4.816161000 | -0.489515000 | -0.769857000 |   |              |              |              |
| 6                                 | -3.586964000 | -0.860340000 | -0.214059000 |   |              |              |              |
| 6                                 | -3.259100000 | -2.335314000 | -0.043015000 |   |              |              |              |
| 6                                 | -4.349737000 | -3.055201000 | 0.761853000  |   |              |              |              |
| 6                                 | -3.061987000 | -3.033439000 | -1.393548000 |   |              |              |              |
| 6                                 | -2.126821000 | 2.620250000  | 0.587992000  |   |              |              |              |
| 6                                 | -2.353587000 | 3.970262000  | -0.098080000 |   |              |              |              |

|                             |              |              |              |   |              |              |              |
|-----------------------------|--------------|--------------|--------------|---|--------------|--------------|--------------|
| 1                           | 0.042393000  | -0.694953000 | 3.670263000  | 6 | 2.118196000  | 3.337132000  | 0.537476000  |
| 1                           | 5.674505000  | -1.143230000 | -0.803883000 | 6 | 2.419916000  | 4.629041000  | 0.107396000  |
| 1                           | 6.221240000  | 1.233956000  | -1.179355000 | 6 | 1.533950000  | 5.347546000  | -0.689959000 |
| 1                           | 4.539308000  | 2.977846000  | -0.723475000 | 6 | 0.322747000  | 4.783302000  | -1.058885000 |
| 1                           | 1.010091000  | 2.232190000  | -0.076188000 | 6 | -0.031516000 | 3.493055000  | -0.649784000 |
| 1                           | 1.288371000  | 4.564155000  | -0.590646000 | 6 | -1.390846000 | 2.937217000  | -1.039772000 |
| 1                           | 3.033169000  | 4.507887000  | -0.348595000 | 6 | -2.522150000 | 3.787938000  | -0.448724000 |
| 1                           | 2.303960000  | 3.661916000  | -1.728211000 | 6 | -1.547091000 | 2.849779000  | -2.562218000 |
| 1                           | 1.181926000  | 3.909264000  | 1.793294000  | 6 | 3.087523000  | 2.574064000  | 1.434659000  |
| 1                           | 2.862783000  | 3.409432000  | 2.044925000  | 6 | 4.548241000  | 3.005454000  | 1.262744000  |
| 1                           | 1.535701000  | 2.257467000  | 2.307789000  | 6 | 2.712987000  | 2.713341000  | 2.919180000  |
| 1                           | 2.438530000  | -2.334369000 | 0.651944000  | 6 | 0.023381000  | 1.187678000  | 1.721815000  |
| 1                           | 4.158310000  | -3.952821000 | 1.211577000  | 6 | -0.024432000 | -0.077428000 | 2.313552000  |
| 1                           | 5.418670000  | -3.005089000 | 0.418390000  | 6 | 0.438545000  | -1.280326000 | 1.766559000  |
| 1                           | 4.670048000  | -2.402218000 | 1.900974000  | 7 | 0.981031000  | -1.381617000 | 0.549495000  |
| 1                           | 3.015997000  | -4.017195000 | -1.075086000 | 6 | 1.505888000  | -2.659042000 | 0.131069000  |
| 1                           | 4.200060000  | -2.908955000 | -1.785677000 | 6 | 0.673472000  | -3.603707000 | -0.491661000 |
| 1                           | 2.471412000  | -2.515416000 | -1.845077000 | 6 | 1.240459000  | -4.823896000 | -0.874855000 |
| 1                           | 3.154151000  | 0.547281000  | 2.678351000  | 6 | 2.580583000  | -5.098913000 | -0.649811000 |
| 1                           | 3.055905000  | -1.211954000 | 2.736229000  | 6 | 3.392235000  | -4.144199000 | -0.044365000 |
| 1                           | 2.187537000  | -0.247386000 | 3.943567000  | 6 | 2.876829000  | -2.910058000 | 0.348501000  |
| 1                           | -2.174071000 | -0.444989000 | 3.937987000  | 6 | 3.768601000  | -1.859111000 | 0.993815000  |
| 1                           | -2.756758000 | -1.653791000 | 2.783783000  | 6 | 5.221515000  | -1.927681000 | 0.516904000  |
| 1                           | -3.270477000 | 0.030026000  | 2.619109000  | 6 | 3.719975000  | -1.932087000 | 2.526655000  |
| 1                           | -0.613733000 | -1.374424000 | -3.313995000 | 6 | -0.799991000 | -3.353791000 | -0.765648000 |
| 1                           | -1.018245000 | 0.079933000  | -4.243227000 | 6 | -1.702479000 | -4.377918000 | -0.064659000 |
| 1                           | -2.009370000 | -0.381014000 | -2.852474000 | 6 | -1.085137000 | -3.370588000 | -2.273090000 |
| 1                           | -0.071053000 | 2.662521000  | -1.780374000 | 6 | 0.207095000  | -2.519623000 | 2.596264000  |
| 1                           | -0.582826000 | 2.318009000  | -3.433780000 | 6 | -0.700466000 | 2.299256000  | 2.437142000  |
| 1                           | -1.676390000 | 1.975291000  | -2.089888000 | 1 | 3.364540000  | 5.081312000  | 0.391989000  |
| 1                           | 2.019854000  | 1.213144000  | -2.460702000 | 1 | 1.791371000  | 6.349764000  | -1.018702000 |
| 1                           | 1.806055000  | -0.472338000 | -2.946606000 | 1 | -0.371472000 | 5.352045000  | -1.671993000 |
| 1                           | 1.275847000  | 0.829410000  | -4.020183000 | 1 | -1.494924000 | 1.928123000  | -0.628625000 |
| 1                           | 0.154408000  | -4.130360000 | -0.831046000 | 1 | -3.484155000 | 3.306302000  | -0.643852000 |
| 13                          | 0.010618000  | -0.398490000 | -0.559365000 | 1 | -2.417097000 | 3.903464000  | 0.633761000  |
|                             |              |              |              | 1 | -2.535165000 | 4.788908000  | -0.895413000 |
|                             |              |              |              | 1 | -2.508309000 | 2.388438000  | -2.810916000 |
|                             |              |              |              | 1 | -0.745369000 | 2.254862000  | -3.011481000 |
|                             |              |              |              | 1 | -1.518341000 | 3.845462000  | -3.019015000 |
|                             |              |              |              | 1 | 3.014883000  | 1.510777000  | 1.171417000  |
| <b>3-TS2 (in gas phase)</b> |              |              |              |   |              |              |              |
| 1                           | -1.593221000 | -0.385212000 | 0.351115000  |   |              |              |              |
| 7                           | 0.602369000  | 1.420075000  | 0.538412000  |   |              |              |              |
| 6                           | 0.881979000  | 2.777549000  | 0.140542000  |   |              |              |              |



|   |              |              |              |   |              |              |              |
|---|--------------|--------------|--------------|---|--------------|--------------|--------------|
| 6 | 2.749164000  | 3.619080000  | 0.510883000  | 1 | 0.554371000  | -0.192395000 | -3.248379000 |
| 6 | 1.694556000  | 2.714846000  | 2.599797000  | 1 | -1.102373000 | -5.532308000 | 1.381115000  |
| 6 | -2.916424000 | 2.731479000  | -1.421912000 | 1 | -3.507644000 | -5.821104000 | 0.901372000  |
| 6 | -4.350093000 | 3.241107000  | -1.241101000 | 1 | -4.772918000 | -4.020695000 | -0.214016000 |
| 6 | -2.545103000 | 2.847388000  | -2.908442000 | 1 | -3.396802000 | -0.640961000 | -0.782892000 |
| 6 | 0.066474000  | 1.170506000  | -1.705481000 | 1 | -5.794040000 | -0.602878000 | -0.981736000 |
| 6 | 0.049154000  | -0.097104000 | -2.295302000 | 1 | -5.915021000 | -2.360397000 | -1.027218000 |
| 6 | -0.498215000 | -1.269812000 | -1.759693000 | 1 | -5.422124000 | -1.547448000 | 0.471083000  |
| 7 | -1.062743000 | -1.337612000 | -0.548950000 | 1 | -4.433277000 | -0.894741000 | -3.054031000 |
| 6 | -1.702872000 | -2.567662000 | -0.149225000 | 1 | -4.174797000 | -2.646818000 | -2.950735000 |
| 6 | -0.972448000 | -3.574813000 | 0.504062000  | 1 | -2.790531000 | -1.538044000 | -2.984532000 |
| 6 | -1.650618000 | -4.741310000 | 0.875616000  | 1 | 0.865800000  | -2.486396000 | 0.439673000  |
| 6 | -3.001433000 | -4.906068000 | 0.608750000  | 1 | 2.404297000  | -4.344034000 | 0.285990000  |
| 6 | -3.711562000 | -3.891099000 | -0.026083000 | 1 | 1.126474000  | -5.530445000 | 0.613018000  |
| 6 | -3.083752000 | -2.705515000 | -0.406658000 | 1 | 1.131474000  | -4.636621000 | -0.910776000 |
| 6 | -3.870967000 | -1.585920000 | -1.073709000 | 1 | 1.796722000  | -3.264802000 | 2.560302000  |
| 6 | -5.331406000 | -1.527373000 | -0.619875000 | 1 | 0.494304000  | -4.448925000 | 2.759504000  |
| 6 | -3.807052000 | -1.673839000 | -2.604569000 | 1 | 0.127729000  | -2.721149000 | 2.849499000  |
| 6 | 0.508398000  | -3.446874000 | 0.823045000  | 1 | -1.168942000 | -3.218892000 | -2.470151000 |
| 6 | 1.337722000  | -4.554411000 | 0.160652000  | 1 | 0.577939000  | -3.024795000 | -2.265464000 |
| 6 | 0.743030000  | -3.467907000 | 2.338616000  | 1 | -0.228957000 | -2.266971000 | -3.644850000 |
| 6 | -0.340637000 | -2.519100000 | -2.588871000 | 1 | 0.881497000  | 2.039086000  | -3.499260000 |
| 6 | 0.840488000  | 2.242294000  | -2.427379000 | 1 | 1.866941000  | 2.205634000  | -2.036677000 |
| 1 | -3.045479000 | 5.254390000  | -0.387691000 | 1 | 0.443298000  | 3.245096000  | -2.263389000 |
| 1 | -1.409249000 | 6.426117000  | 1.035817000  | 6 | -2.476467000 | 0.429761000  | 2.013396000  |
| 1 | 0.684090000  | 5.299672000  | 1.706598000  | 6 | -1.896241000 | 1.296420000  | 3.147447000  |
| 1 | 1.615771000  | 1.820386000  | 0.653419000  | 6 | -3.718732000 | 1.163846000  | 1.502081000  |
| 1 | 3.681251000  | 3.086553000  | 0.720496000  | 6 | -2.916570000 | -0.905433000 | 2.637151000  |
| 1 | 2.672052000  | 3.746530000  | -0.573170000 | 1 | -1.055732000 | 0.807047000  | 3.651886000  |
| 1 | 2.812302000  | 4.615984000  | 0.963141000  | 1 | -2.669451000 | 1.486414000  | 3.909851000  |
| 1 | 2.622275000  | 2.193530000  | 2.859572000  | 1 | -1.553117000 | 2.276256000  | 2.787245000  |
| 1 | 0.854011000  | 2.165167000  | 3.035435000  | 1 | -4.199065000 | 0.676808000  | 0.645000000  |
| 1 | 1.722053000  | 3.705131000  | 3.069164000  | 1 | -4.478099000 | 1.227877000  | 2.299140000  |
| 1 | -2.899551000 | 1.665871000  | -1.158793000 | 1 | -3.472001000 | 2.190914000  | 1.213591000  |
| 1 | -5.045581000 | 2.557683000  | -1.739767000 | 1 | -3.466929000 | -1.536437000 | 1.930154000  |
| 1 | -4.643148000 | 3.314290000  | -0.190402000 | 1 | -2.067430000 | -1.495248000 | 3.008177000  |
| 1 | -4.482909000 | 4.227309000  | -1.700219000 | 1 | -3.581607000 | -0.721946000 | 3.497250000  |
| 1 | -3.337747000 | 2.410141000  | -3.525963000 | 5 | 2.795558000  | -0.546707000 | -0.230119000 |
| 1 | -1.617150000 | 2.326569000  | -3.153270000 | 8 | 3.505347000  | 0.614060000  | -0.511244000 |
| 1 | -2.434907000 | 3.899656000  | -3.194901000 | 8 | 3.589937000  | -1.679716000 | -0.346222000 |

|                             |              |              |              |   |              |              |              |
|-----------------------------|--------------|--------------|--------------|---|--------------|--------------|--------------|
| 6                           | 4.901079000  | 0.258468000  | -0.505284000 | 6 | -0.147516000 | -0.084082000 | 2.255070000  |
| 6                           | 4.852826000  | -1.257078000 | -0.888947000 | 6 | 0.328126000  | -1.286757000 | 1.719420000  |
| 6                           | 4.782341000  | -1.477362000 | -2.400501000 | 7 | 0.913403000  | -1.386852000 | 0.520477000  |
| 6                           | 5.963509000  | -2.103025000 | -0.286739000 | 6 | 1.442854000  | -2.664757000 | 0.106308000  |
| 6                           | 5.628249000  | 1.148827000  | -1.500940000 | 6 | 0.618789000  | -3.602657000 | -0.538135000 |
| 6                           | 5.451219000  | 0.486132000  | 0.902215000  | 6 | 1.191031000  | -4.816146000 | -0.933471000 |
| 1                           | 5.275876000  | 1.527777000  | 1.189157000  | 6 | 2.528655000  | -5.093349000 | -0.695559000 |
| 1                           | 4.948427000  | -0.153796000 | 1.630779000  | 6 | 3.329695000  | -4.150137000 | -0.058855000 |
| 1                           | 6.529410000  | 0.299164000  | 0.941452000  | 6 | 2.808344000  | -2.922326000 | 0.346664000  |
| 1                           | 5.602599000  | 2.185830000  | -1.150544000 | 6 | 3.686460000  | -1.889674000 | 1.037407000  |
| 1                           | 5.158724000  | 1.113594000  | -2.486739000 | 6 | 5.150061000  | -1.948421000 | 0.593449000  |
| 1                           | 6.677831000  | 0.850365000  | -1.599590000 | 6 | 3.598369000  | -2.005274000 | 2.565755000  |
| 1                           | 3.991941000  | -0.862698000 | -2.844669000 | 6 | -0.854164000 | -3.351882000 | -0.808774000 |
| 1                           | 4.543330000  | -2.527710000 | -2.592776000 | 6 | -1.756111000 | -4.390371000 | -0.128617000 |
| 1                           | 5.730255000  | -1.242187000 | -2.895302000 | 6 | -1.146246000 | -3.335437000 | -2.314938000 |
| 1                           | 6.946556000  | -1.754213000 | -0.622542000 | 6 | 0.052195000  | -2.527322000 | 2.531700000  |
| 1                           | 5.846372000  | -3.143471000 | -0.605793000 | 6 | -0.843069000 | 2.287060000  | 2.359060000  |
| 1                           | 5.934672000  | -2.078245000 | 0.804616000  | 1 | 3.360982000  | 5.048878000  | 0.486148000  |
| 8                           | 0.341986000  | -0.280666000 | 1.866457000  | 1 | 1.855160000  | 6.349606000  | -0.967805000 |
| 6                           | 1.499637000  | -0.414569000 | 2.410866000  | 1 | -0.303619000 | 5.390315000  | -1.693857000 |
| 8                           | 2.589231000  | -0.449944000 | 1.852949000  | 1 | -1.500787000 | 1.980600000  | -0.688127000 |
| 1                           | 1.464907000  | -0.508025000 | 3.509576000  | 1 | -3.475110000 | 3.353835000  | -0.757529000 |
| 13                          | -0.990707000 | 0.085710000  | 0.724677000  | 1 | -2.437019000 | 3.960872000  | 0.538362000  |
| <b>3-IM2 (in gas phase)</b> |              |              |              | 1 | -2.520971000 | 4.838131000  | -0.998710000 |
| 1                           | -1.512537000 | -0.358168000 | 0.176148000  | 1 | -2.452773000 | 2.441783000  | -2.902472000 |
| 7                           | 0.545454000  | 1.425678000  | 0.513811000  | 1 | -0.682333000 | 2.300890000  | -3.063616000 |
| 6                           | 0.854360000  | 2.784223000  | 0.138986000  | 1 | -1.452317000 | 3.890740000  | -3.086840000 |
| 6                           | 2.084106000  | 3.323389000  | 0.580302000  | 1 | 2.925730000  | 1.480734000  | 1.242882000  |
| 6                           | 2.419505000  | 4.612900000  | 0.167653000  | 1 | 5.102899000  | 2.221070000  | 1.923339000  |
| 6                           | 1.571489000  | 5.349761000  | -0.653812000 | 1 | 4.822350000  | 2.986950000  | 0.350767000  |
| 6                           | 0.363429000  | 4.807242000  | -1.064067000 | 1 | 4.662777000  | 3.925795000  | 1.845916000  |
| 6                           | -0.022239000 | 3.520426000  | -0.674258000 | 1 | 3.301502000  | 2.187259000  | 3.630686000  |
| 6                           | -1.375788000 | 2.983941000  | -1.104273000 | 1 | 1.598552000  | 2.255861000  | 3.173211000  |
| 6                           | -2.518815000 | 3.839969000  | -0.545389000 | 1 | 2.549831000  | 3.749918000  | 3.256512000  |
| 6                           | -1.493138000 | 2.895451000  | -2.630313000 | 1 | -0.682059000 | -0.156113000 | 3.194072000  |
| 6                           | 3.008344000  | 2.542710000  | 1.508609000  | 1 | 0.567611000  | -5.553833000 | -1.432329000 |
| 6                           | 4.481790000  | 2.946735000  | 1.388519000  | 1 | 2.952884000  | -6.042624000 | -1.008099000 |
| 6                           | 2.580558000  | 2.690652000  | 2.977598000  | 1 | 4.378276000  | -4.371121000 | 0.113806000  |
| 6                           | -0.081498000 | 1.184329000  | 1.673161000  | 1 | 3.298634000  | -0.901167000 | 0.765338000  |
|                             |              |              |              | 1 | 5.687782000  | -1.076711000 | 0.980610000  |

|   |              |              |              |    |                                   |              |              |
|---|--------------|--------------|--------------|----|-----------------------------------|--------------|--------------|
| 1 | 5.653677000  | -2.839741000 | 0.983065000  | 1  | -5.388349000                      | 1.682330000  | -1.077457000 |
| 1 | 5.243556000  | -1.949309000 | -0.497184000 | 1  | -5.122065000                      | -0.010008000 | -1.534027000 |
| 1 | 4.277112000  | -1.287448000 | 3.039173000  | 1  | -6.573314000                      | 0.445986000  | -0.607519000 |
| 1 | 3.885595000  | -3.012052000 | 2.889433000  | 1  | -5.377758000                      | 2.355449000  | 1.304215000  |
| 1 | 2.589229000  | -1.800962000 | 2.933965000  | 1  | -4.669904000                      | 1.306609000  | 2.543371000  |
| 1 | -1.121581000 | -2.373929000 | -0.400531000 | 1  | -6.309421000                      | 0.981833000  | 1.931605000  |
| 1 | -2.796370000 | -4.059537000 | -0.197215000 | 1  | -3.275410000                      | -0.609897000 | 2.605867000  |
| 1 | -1.663056000 | -5.370495000 | -0.610695000 | 1  | -3.830272000                      | -2.294831000 | 2.515209000  |
| 1 | -1.504914000 | -4.518508000 | 0.928370000  | 1  | -4.942715000                      | -1.028533000 | 3.080664000  |
| 1 | -2.182071000 | -3.020978000 | -2.485401000 | 1  | -6.655605000                      | -1.572638000 | 1.159729000  |
| 1 | -1.019962000 | -4.333824000 | -2.748885000 | 1  | -5.575435000                      | -2.956598000 | 0.903809000  |
| 1 | -0.472396000 | -2.656785000 | -2.847114000 | 1  | -5.999018000                      | -1.910973000 | -0.460298000 |
| 1 | 0.789522000  | -3.315224000 | 2.373156000  | 8  | -0.324728000                      | -0.201529000 | -1.987974000 |
| 1 | -0.929120000 | -2.909950000 | 2.225095000  | 6  | -1.510344000                      | -0.219212000 | -2.430529000 |
| 1 | 0.000353000  | -2.282424000 | 3.593987000  | 8  | -2.579737000                      | -0.207551000 | -1.791722000 |
| 1 | -0.927640000 | 2.097257000  | 3.430746000  | 1  | -1.604173000                      | -0.250034000 | -3.524164000 |
| 1 | -1.852883000 | 2.265484000  | 1.923664000  | 13 | 0.979937000                       | 0.057254000  | -0.722034000 |
| 1 | -0.408953000 | 3.274434000  | 2.194324000  |    |                                   |              |              |
| 6 | 2.502021000  | 0.323915000  | -1.980911000 |    | <b>3-IM2 (in benzene solvent)</b> |              |              |
| 6 | 2.024742000  | 1.276241000  | -3.096162000 | 1  | -1.606604000                      | -0.237408000 | 0.278019000  |
| 6 | 3.790672000  | 0.936087000  | -1.421524000 | 7  | 0.643765000                       | 1.418086000  | 0.533946000  |
| 6 | 2.839399000  | -1.025148000 | -2.640856000 | 6  | 0.986043000                       | 2.765727000  | 0.148199000  |
| 1 | 1.166351000  | 0.871741000  | -3.642771000 | 6  | 2.244923000                       | 3.266856000  | 0.552067000  |
| 1 | 2.835186000  | 1.429218000  | -3.826230000 | 6  | 2.607168000                       | 4.546397000  | 0.129782000  |
| 1 | 1.748866000  | 2.265886000  | -2.706568000 | 6  | 1.757706000                       | 5.309990000  | -0.665812000 |
| 1 | 4.211379000  | 0.385685000  | -0.572092000 | 6  | 0.521628000                       | 4.805135000  | -1.040088000 |
| 1 | 4.566002000  | 0.960264000  | -2.204103000 | 6  | 0.107912000                       | 3.530037000  | -0.638107000 |
| 1 | 3.621847000  | 1.970616000  | -1.105224000 | 6  | -1.276184000                      | 3.039823000  | -1.028055000 |
| 1 | 3.311203000  | -1.725617000 | -1.942802000 | 6  | -2.369092000                      | 3.948030000  | -0.452871000 |
| 1 | 1.949357000  | -1.521627000 | -3.050365000 | 6  | -1.433674000                      | 2.942784000  | -2.549563000 |
| 1 | 3.539799000  | -0.871517000 | -3.477391000 | 6  | 3.176554000                       | 2.456593000  | 1.447533000  |
| 5 | -2.663850000 | -0.307696000 | -0.141318000 | 6  | 4.657087000                       | 2.809585000  | 1.269862000  |
| 8 | -3.363194000 | 0.845447000  | 0.334299000  | 6  | 2.811708000                       | 2.619245000  | 2.931359000  |
| 8 | -3.472167000 | -1.466445000 | 0.092903000  | 6  | 0.045493000                       | 1.199180000  | 1.713674000  |
| 6 | -4.718516000 | 0.450468000  | 0.551437000  | 6  | -0.060031000                      | -0.066869000 | 2.294164000  |
| 6 | -4.559452000 | -1.059591000 | 0.918733000  | 6  | 0.358103000                       | -1.287709000 | 1.749804000  |
| 6 | -4.133536000 | -1.252114000 | 2.377545000  | 7  | 0.905073000                       | -1.409737000 | 0.534750000  |
| 6 | -5.775028000 | -1.921659000 | 0.608410000  | 6  | 1.381473000                       | -2.706215000 | 0.113660000  |
| 6 | -5.304843000 | 1.320557000  | 1.654173000  | 6  | 0.511748000                       | -3.615630000 | -0.511743000 |
| 6 | -5.505595000 | 0.645288000  | -0.747327000 | 6  | 1.030985000                       | -4.852284000 | -0.910341000 |

|   |              |              |              |   |              |              |              |
|---|--------------|--------------|--------------|---|--------------|--------------|--------------|
| 6 | 2.360970000  | -5.179230000 | -0.692071000 | 1 | -2.914458000 | -3.965761000 | -0.138715000 |
| 6 | 3.208755000  | -4.262820000 | -0.076313000 | 1 | -1.814095000 | -5.306844000 | -0.534663000 |
| 6 | 2.741704000  | -3.012642000 | 0.328772000  | 1 | -1.633542000 | -4.436126000 | 0.991961000  |
| 6 | 3.674134000  | -2.005066000 | 0.985925000  | 1 | -2.289447000 | -2.950638000 | -2.434767000 |
| 6 | 5.121175000  | -2.116973000 | 0.500887000  | 1 | -1.171618000 | -4.299301000 | -2.696083000 |
| 6 | 3.628705000  | -2.103130000 | 2.516713000  | 1 | -0.574434000 | -2.641688000 | -2.812262000 |
| 6 | -0.955404000 | -3.312002000 | -0.763628000 | 1 | 0.791524000  | -3.318603000 | 2.417408000  |
| 6 | -1.880979000 | -4.317214000 | -0.067352000 | 1 | -0.921296000 | -2.883866000 | 2.294777000  |
| 6 | -1.262661000 | -3.294935000 | -2.266383000 | 1 | 0.043624000  | -2.259913000 | 3.638676000  |
| 6 | 0.072252000  | -2.514424000 | 2.577564000  | 1 | -0.706943000 | 2.132403000  | 3.502697000  |
| 6 | -0.636473000 | 2.332897000  | 2.431905000  | 1 | -1.657928000 | 2.383054000  | 2.028503000  |
| 1 | 3.570553000  | 4.953373000  | 0.420218000  | 1 | -0.152730000 | 3.297913000  | 2.273644000  |
| 1 | 2.062504000  | 6.301320000  | -0.987769000 | 6 | 2.486573000  | 0.238858000  | -2.015413000 |
| 1 | -0.144809000 | 5.409399000  | -1.650498000 | 6 | 2.000858000  | 1.180470000  | -3.134547000 |
| 1 | -1.428893000 | 2.044495000  | -0.599669000 | 6 | 3.801089000  | 0.829257000  | -1.495860000 |
| 1 | -3.349872000 | 3.497940000  | -0.629946000 | 6 | 2.780215000  | -1.125920000 | -2.660763000 |
| 1 | -2.252931000 | 4.087053000  | 0.626150000  | 1 | 1.115144000  | 0.789906000  | -3.647454000 |
| 1 | -2.347071000 | 4.938162000  | -0.923269000 | 1 | 2.790655000  | 1.298900000  | -3.894097000 |
| 1 | -2.418163000 | 2.531036000  | -2.799564000 | 1 | 1.763390000  | 2.185428000  | -2.759321000 |
| 1 | -0.661152000 | 2.309265000  | -2.997924000 | 1 | 4.230168000  | 0.278688000  | -0.650252000 |
| 1 | -1.358065000 | 3.931267000  | -3.017253000 | 1 | 4.559785000  | 0.827397000  | -2.295788000 |
| 1 | 3.047377000  | 1.397838000  | 1.187702000  | 1 | 3.664868000  | 1.870972000  | -1.187666000 |
| 1 | 5.273697000  | 2.057044000  | 1.772729000  | 1 | 3.250683000  | -1.826988000 | -1.962364000 |
| 1 | 4.959131000  | 2.847260000  | 0.219651000  | 1 | 1.873495000  | -1.610299000 | -3.048098000 |
| 1 | 4.894461000  | 3.777206000  | 1.726376000  | 1 | 3.468802000  | -1.002281000 | -3.512698000 |
| 1 | 3.547024000  | 2.100904000  | 3.556819000  | 5 | -2.749475000 | -0.202235000 | -0.085472000 |
| 1 | 1.829301000  | 2.206400000  | 3.170464000  | 8 | -3.474888000 | 0.959634000  | 0.325523000  |
| 1 | 2.815494000  | 3.678861000  | 3.211641000  | 8 | -3.563963000 | -1.358399000 | 0.152528000  |
| 1 | -0.568599000 | -0.117710000 | 3.248771000  | 6 | -4.838474000 | 0.567750000  | 0.486698000  |
| 1 | 0.372570000  | -5.568245000 | -1.396009000 | 6 | -4.699004000 | -0.932185000 | 0.901719000  |
| 1 | 2.742903000  | -6.146323000 | -1.005405000 | 6 | -4.364646000 | -1.088773000 | 2.387795000  |
| 1 | 4.251232000  | -4.523251000 | 0.078756000  | 6 | -5.894809000 | -1.803650000 | 0.543734000  |
| 1 | 3.311489000  | -1.006405000 | 0.715198000  | 6 | -5.481340000 | 1.463623000  | 1.535951000  |
| 1 | 5.699196000  | -1.259475000 | 0.861776000  | 6 | -5.563461000 | 0.728521000  | -0.852145000 |
| 1 | 5.608644000  | -3.019109000 | 0.886595000  | 1 | -5.419788000 | 1.753470000  | -1.210031000 |
| 1 | 5.186539000  | -2.134137000 | -0.592047000 | 1 | -5.153353000 | 0.047128000  | -1.602359000 |
| 1 | 4.347764000  | -1.406130000 | 2.961753000  | 1 | -6.639464000 | 0.545246000  | -0.758500000 |
| 1 | 3.888231000  | -3.116042000 | 2.845632000  | 1 | -5.549936000 | 2.488280000  | 1.155178000  |
| 1 | 2.640877000  | -1.856448000 | 2.916467000  | 1 | -4.888052000 | 1.484914000  | 2.453566000  |
| 1 | -1.182812000 | -2.322512000 | -0.356314000 | 1 | -6.495176000 | 1.125633000  | 1.779346000  |







|   |              |              |              |    |              |              |              |
|---|--------------|--------------|--------------|----|--------------|--------------|--------------|
| 6 | -1.833861000 | -3.931512000 | -0.223514000 | 1  | 5.362466000  | -2.482336000 | -0.301705000 |
| 6 | -1.511724000 | -3.902961000 | 2.257352000  | 1  | 4.346214000  | -1.987782000 | -3.227762000 |
| 6 | 3.452037000  | -2.006626000 | -1.243868000 | 1  | 2.930011000  | -3.049224000 | -3.104697000 |
| 6 | 4.741562000  | -1.606484000 | -0.518511000 | 1  | 4.468919000  | -3.546544000 | -2.397769000 |
| 6 | 3.813179000  | -2.685843000 | -2.572948000 | 1  | -0.133467000 | 0.012057000  | -3.473637000 |
| 6 | 0.358143000  | -1.246830000 | -1.842025000 | 1  | 0.311626000  | 5.660486000  | 1.126492000  |
| 6 | 0.156137000  | 0.016362000  | -2.428610000 | 1  | 2.738514000  | 5.904975000  | 1.529238000  |
| 6 | 0.524324000  | 1.264295000  | -1.896289000 | 1  | 4.288013000  | 4.127230000  | 0.832836000  |
| 7 | 0.860777000  | 1.429914000  | -0.617012000 | 1  | 3.289850000  | 0.775509000  | -0.155958000 |
| 6 | 1.364217000  | 2.685845000  | -0.123299000 | 1  | 5.711563000  | 0.982066000  | 0.011983000  |
| 6 | 0.472377000  | 3.714459000  | 0.231444000  | 1  | 5.639904000  | 2.739347000  | -0.036224000 |
| 6 | 0.992044000  | 4.866226000  | 0.830896000  | 1  | 5.010053000  | 1.868579000  | 1.374071000  |
| 6 | 2.352088000  | 5.007487000  | 1.055648000  | 1  | 4.671640000  | 1.065218000  | -2.236944000 |
| 6 | 3.224845000  | 3.998087000  | 0.662796000  | 1  | 4.263871000  | 2.789617000  | -2.239725000 |
| 6 | 2.756763000  | 2.825484000  | 0.067491000  | 1  | 2.995108000  | 1.571515000  | -2.464259000 |
| 6 | 3.730020000  | 1.750506000  | -0.400913000 | 1  | -1.225573000 | 2.706145000  | -0.566027000 |
| 6 | 5.095518000  | 1.843451000  | 0.282778000  | 1  | -2.548835000 | 4.697926000  | -1.150683000 |
| 6 | 3.918706000  | 1.798119000  | -1.924094000 | 1  | -1.396909000 | 5.758200000  | -0.342506000 |
| 6 | -1.022444000 | 3.632945000  | -0.024180000 | 1  | -0.912834000 | 4.903438000  | -1.811704000 |
| 6 | -1.491736000 | 4.811982000  | -0.886647000 | 1  | -2.893325000 | 3.467042000  | 1.059426000  |
| 6 | -1.825686000 | 3.574667000  | 1.276720000  | 1  | -1.680829000 | 4.487225000  | 1.867870000  |
| 6 | 0.499525000  | 2.440273000  | -2.840589000 | 1  | -1.540424000 | 2.717380000  | 1.889215000  |
| 6 | 0.254185000  | -2.422997000 | -2.784591000 | 1  | -0.511776000 | 2.867444000  | -2.841620000 |
| 6 | 1.040041000  | 0.053697000  | 2.445209000  | 1  | 0.729879000  | 2.124618000  | -3.859931000 |
| 6 | 0.480777000  | -1.151114000 | 3.217091000  | 1  | 1.195419000  | 3.225555000  | -2.540242000 |
| 6 | 2.568423000  | -0.052919000 | 2.456346000  | 1  | 0.902494000  | -2.275539000 | -3.652174000 |
| 6 | 0.637061000  | 1.329489000  | 3.200678000  | 1  | -0.775708000 | -2.470131000 | -3.157152000 |
| 1 | 4.186730000  | -4.324805000 | -0.131998000 | 1  | 0.495292000  | -3.374285000 | -2.310901000 |
| 1 | 2.870070000  | -5.904465000 | 1.234234000  | 1  | -0.615095000 | -1.202379000 | 3.184482000  |
| 1 | 0.500525000  | -5.420281000 | 1.733128000  | 1  | 0.773483000  | -1.094363000 | 4.278614000  |
| 1 | -1.210505000 | -2.254386000 | 0.936003000  | 1  | 0.868431000  | -2.098991000 | 2.825478000  |
| 1 | -2.903158000 | -3.818058000 | -0.023879000 | 1  | 3.041049000  | 0.842212000  | 2.036208000  |
| 1 | -1.621431000 | -3.427964000 | -1.169630000 | 1  | 2.938395000  | -0.154691000 | 3.490213000  |
| 1 | -1.605126000 | -4.998945000 | -0.332350000 | 1  | 2.924367000  | -0.929754000 | 1.899104000  |
| 1 | -2.507101000 | -3.500047000 | 2.468600000  | 1  | 0.995149000  | 2.243152000  | 2.708075000  |
| 1 | -0.854269000 | -3.645456000 | 3.093255000  | 1  | -0.449962000 | 1.412000000  | 3.316438000  |
| 1 | -1.600811000 | -4.995005000 | 2.220283000  | 1  | 1.068717000  | 1.317468000  | 4.215368000  |
| 1 | 2.892504000  | -1.090537000 | -1.466637000 | 1  | -3.040164000 | -0.709664000 | 3.920466000  |
| 1 | 5.335012000  | -0.937034000 | -1.150990000 | 13 | 0.268891000  | 0.081154000  | 0.613143000  |
| 1 | 4.538791000  | -1.097437000 | 0.428235000  |    |              |              |              |

|                  |              |              |              |   |              |              |              |
|------------------|--------------|--------------|--------------|---|--------------|--------------|--------------|
| 4 (in gas phase) |              |              |              | 6 | 2.719264000  | 2.606591000  | 3.705523000  |
| 7                | 1.499142000  | 0.005921000  | 0.803995000  | 1 | 2.038698000  | 1.919727000  | 4.215671000  |
| 7                | -1.499092000 | -0.006501000 | 0.803927000  | 1 | 2.278319000  | 3.608835000  | 3.735508000  |
| 6                | 2.882318000  | -0.536547000 | -1.616442000 | 1 | 3.662097000  | 2.638733000  | 4.262917000  |
| 6                | 4.210109000  | -0.154919000 | -1.383735000 | 6 | 2.517585000  | -2.777037000 | 0.853479000  |
| 1                | 4.433224000  | 0.658974000  | -0.697335000 | 1 | 1.759396000  | -2.369227000 | 0.178194000  |
| 6                | 5.250396000  | -0.817686000 | -2.028221000 | 6 | 3.487125000  | -3.628022000 | 0.022279000  |
| 1                | 6.276544000  | -0.518626000 | -1.840404000 | 1 | 4.160342000  | -3.007860000 | -0.573985000 |
| 6                | 4.971874000  | -1.857154000 | -2.914230000 | 1 | 2.928349000  | -4.284188000 | -0.654191000 |
| 1                | 5.783525000  | -2.361967000 | -3.429295000 | 1 | 4.098290000  | -4.269024000 | 0.667702000  |
| 6                | 3.656424000  | -2.263027000 | -3.120723000 | 6 | 1.812598000  | -3.671161000 | 1.883495000  |
| 1                | 3.438565000  | -3.090880000 | -3.787927000 | 1 | 1.058488000  | -3.119735000 | 2.449375000  |
| 6                | 2.613908000  | -1.616882000 | -2.461705000 | 1 | 2.542595000  | -4.078357000 | 2.592653000  |
| 1                | 1.590877000  | -1.950751000 | -2.602320000 | 1 | 1.331764000  | -4.518615000 | 1.379389000  |
| 6                | -2.881974000 | 0.537196000  | -1.616273000 | 6 | -2.742784000 | 0.281742000  | 1.488323000  |
| 6                | -4.209895000 | 0.155869000  | -1.383830000 | 6 | -3.225812000 | 1.611393000  | 1.525263000  |
| 1                | -4.433292000 | -0.658494000 | -0.698082000 | 6 | -4.411447000 | 1.875978000  | 2.211395000  |
| 6                | -5.249973000 | 0.819564000  | -2.027697000 | 1 | -4.786266000 | 2.895381000  | 2.241461000  |
| 1                | -6.276216000 | 0.520712000  | -1.840073000 | 6 | -5.121636000 | 0.868685000  | 2.850395000  |
| 6                | -4.971127000 | 1.859679000  | -2.912837000 | 1 | -6.046717000 | 1.095901000  | 3.371624000  |
| 1                | -5.782622000 | 2.365240000  | -3.427416000 | 6 | -4.628679000 | -0.426104000 | 2.828380000  |
| 6                | -3.655541000 | 2.265255000  | -3.119041000 | 1 | -5.169472000 | -1.216069000 | 3.343260000  |
| 1                | -3.437416000 | 3.093621000  | -3.785521000 | 6 | -3.436196000 | -0.742322000 | 2.170059000  |
| 6                | -2.613232000 | 1.618190000  | -2.460603000 | 6 | -2.516287000 | 2.776563000  | 0.853987000  |
| 1                | -1.590111000 | 1.951892000  | -2.600919000 | 1 | -1.758994000 | 2.368531000  | 0.177855000  |
| 6                | 2.742666000  | -0.282183000 | 1.488750000  | 6 | -1.809593000 | 3.668431000  | 1.884784000  |
| 6                | 3.435380000  | 0.741937000  | 2.171155000  | 1 | -1.055927000 | 3.115273000  | 2.449600000  |
| 6                | 4.627563000  | 0.425928000  | 2.830095000  | 1 | -2.538706000 | 4.075589000  | 2.594875000  |
| 1                | 5.167844000  | 1.215939000  | 3.345439000  | 1 | -1.327909000 | 4.515951000  | 1.381602000  |
| 6                | 5.120868000  | -0.868733000 | 2.852134000  | 6 | -3.485013000 | 3.629770000  | 0.024150000  |
| 1                | 6.045694000  | -1.095801000 | 3.373879000  | 1 | -4.159389000 | 3.011144000  | -0.572411000 |
| 6                | 4.411374000  | -1.876074000 | 2.212464000  | 1 | -2.925583000 | 4.285751000  | -0.651968000 |
| 1                | 4.786472000  | -2.895376000 | 2.242535000  | 1 | -4.094940000 | 4.271065000  | 0.670452000  |
| 6                | 3.226071000  | -1.611712000 | 1.525643000  | 6 | -2.940473000 | -2.176373000 | 2.249440000  |
| 6                | 2.939304000  | 2.175875000  | 2.250358000  | 1 | -1.970237000 | -2.221791000 | 1.756182000  |
| 1                | 1.969135000  | 2.220995000  | 1.756929000  | 6 | -3.890321000 | -3.146496000 | 1.537438000  |
| 6                | 3.889103000  | 3.146074000  | 1.538372000  | 1 | -3.492274000 | -4.166167000 | 1.578614000  |
| 1                | 4.020818000  | 2.882806000  | 0.483279000  | 1 | -4.021754000 | -2.883364000 | 0.482276000  |
| 1                | 4.876238000  | 3.149983000  | 2.014915000  | 1 | -4.877559000 | -3.150182000 | 2.013764000  |
| 1                | 3.490876000  | 4.165687000  | 1.579306000  | 6 | -2.720733000 | -2.606867000 | 3.704717000  |

|                             |              |              |              |   |              |              |              |
|-----------------------------|--------------|--------------|--------------|---|--------------|--------------|--------------|
| 1                           | -2.040044000 | -1.920093000 | 4.214836000  | 1 | 6.337903000  | 1.758239000  | 1.375131000  |
| 1                           | -2.280065000 | -3.609221000 | 3.734975000  | 6 | 4.985458000  | 3.424983000  | 1.576437000  |
| 1                           | -3.663653000 | -2.638591000 | 4.261994000  | 1 | 5.774653000  | 4.143093000  | 1.777107000  |
| 15                          | -1.524306000 | -0.362314000 | -0.799020000 | 6 | 3.660532000  | 3.847159000  | 1.507500000  |
| 6                           | -1.873270000 | -2.130835000 | -1.119496000 | 1 | 3.413753000  | 4.894920000  | 1.645600000  |
| 6                           | -1.101858000 | -3.053500000 | -0.398937000 | 6 | 2.644799000  | 2.926373000  | 1.262543000  |
| 6                           | -2.746839000 | -2.591969000 | -2.105354000 | 1 | 1.611466000  | 3.254065000  | 1.203985000  |
| 6                           | -1.241333000 | -4.415636000 | -0.625521000 | 6 | -2.550402000 | -0.124157000 | 1.977068000  |
| 1                           | -0.396052000 | -2.699161000 | 0.352058000  | 6 | -3.941454000 | -0.194030000 | 1.821571000  |
| 6                           | -2.881876000 | -3.961971000 | -2.335180000 | 1 | -4.419794000 | 0.252950000  | 0.952757000  |
| 1                           | -3.323315000 | -1.889267000 | -2.698590000 | 6 | -4.717248000 | -0.841682000 | 2.778396000  |
| 6                           | -2.140482000 | -4.872216000 | -1.591249000 | 1 | -5.793785000 | -0.893693000 | 2.651101000  |
| 1                           | -0.652629000 | -5.122510000 | -0.048862000 | 6 | -4.112308000 | -1.423094000 | 3.892064000  |
| 1                           | -3.568114000 | -4.312811000 | -3.099604000 | 1 | -4.721076000 | -1.921469000 | 4.640371000  |
| 1                           | -2.252601000 | -5.937636000 | -1.767328000 | 6 | -2.728664000 | -1.376543000 | 4.037866000  |
| 15                          | 1.524407000  | 0.362189000  | -0.798797000 | 1 | -2.252588000 | -1.839878000 | 4.896232000  |
| 6                           | 1.872940000  | 2.130885000  | -1.118922000 | 6 | -1.947535000 | -0.730752000 | 3.082558000  |
| 6                           | 2.746256000  | 2.592430000  | -2.104815000 | 1 | -0.868092000 | -0.691956000 | 3.198463000  |
| 6                           | 1.101282000  | 3.053216000  | -0.398218000 | 6 | 2.810892000  | -0.440816000 | -1.352409000 |
| 6                           | 2.880796000  | 3.962501000  | -2.334515000 | 6 | 3.343537000  | -1.749507000 | -1.350790000 |
| 1                           | 3.322930000  | 1.890004000  | -2.698183000 | 6 | 4.602179000  | -1.971432000 | -1.916678000 |
| 6                           | 1.240219000  | 4.415423000  | -0.624703000 | 1 | 5.013757000  | -2.977114000 | -1.903219000 |
| 1                           | 0.395674000  | 2.698511000  | 0.352765000  | 6 | 5.319856000  | -0.945804000 | -2.510843000 |
| 6                           | 2.139128000  | 4.872416000  | -1.590457000 | 1 | 6.298324000  | -1.135783000 | -2.941619000 |
| 1                           | 3.566849000  | 4.313652000  | -3.098963000 | 6 | 4.753827000  | 0.318189000  | -2.583479000 |
| 1                           | 0.651301000  | 5.122047000  | -0.047956000 | 1 | 5.289686000  | 1.114549000  | -3.092211000 |
| 1                           | 2.250840000  | 5.937892000  | -1.766460000 | 6 | 3.503208000  | 0.596107000  | -2.027069000 |
| 6                           | 0.000139000  | -0.000198000 | -1.532286000 | 6 | 2.587313000  | -2.956632000 | -0.828498000 |
| 17                          | 0.000276000  | -0.000195000 | -3.307038000 | 1 | 1.649154000  | -2.598674000 | -0.402602000 |
| 13                          | -0.000023000 | -0.001878000 | 1.994999000  | 6 | 3.372263000  | -3.706894000 | 0.254512000  |
| 1                           | 0.035534000  | -1.345687000 | 2.850980000  | 1 | 3.684364000  | -3.043698000 | 1.067995000  |
| 1                           | -0.035580000 | 1.339449000  | 2.854851000  | 1 | 4.269409000  | -4.173746000 | -0.167337000 |
|                             |              |              |              | 1 | 2.756665000  | -4.505031000 | 0.684107000  |
|                             |              |              |              | 6 | 2.237116000  | -3.907206000 | -1.982238000 |
| <b>4-TS1 (in gas phase)</b> |              |              |              | 1 | 1.635450000  | -3.409771000 | -2.748921000 |
| 7                           | 1.547024000  | -0.167250000 | -0.687561000 | 1 | 1.667023000  | -4.764470000 | -1.606699000 |
| 7                           | -1.501230000 | -0.059659000 | -0.672916000 | 1 | 3.145440000  | -4.292764000 | -2.458913000 |
| 6                           | 2.951631000  | 1.571985000  | 1.105222000  | 6 | 2.932574000  | 1.986436000  | -2.263454000 |
| 6                           | 4.291341000  | 1.160177000  | 1.118832000  | 1 | 2.042839000  | 2.111240000  | -1.639020000 |
| 1                           | 4.544309000  | 0.115978000  | 0.947302000  | 6 | 3.920212000  | 3.108163000  | -1.920964000 |
| 6                           | 5.303111000  | 2.084945000  | 1.360087000  |   |              |              |              |

|    |              |              |              |    |                             |              |              |
|----|--------------|--------------|--------------|----|-----------------------------|--------------|--------------|
| 1  | 4.379042000  | 2.963880000  | -0.942451000 | 6  | -2.195848000                | 4.575112000  | -0.456601000 |
| 1  | 3.403193000  | 4.073625000  | -1.922245000 | 1  | -0.974557000                | 2.898819000  | -1.026117000 |
| 1  | 4.722310000  | 3.170216000  | -2.664719000 | 6  | -3.637771000                | 4.237418000  | 1.448725000  |
| 6  | 2.516234000  | 2.121945000  | -3.736830000 | 1  | -3.551237000                | 2.296778000  | 2.368741000  |
| 1  | 1.841026000  | 1.322195000  | -4.047590000 | 6  | -3.156916000                | 5.056553000  | 0.433360000  |
| 1  | 3.403185000  | 2.089408000  | -4.380125000 | 1  | -1.807897000                | 5.216900000  | -1.241373000 |
| 1  | 2.007959000  | 3.078096000  | -3.902782000 | 1  | -4.368881000                | 4.616536000  | 2.155737000  |
| 6  | -2.726973000 | -0.736086000 | -1.067768000 | 1  | -3.519964000                | 6.075513000  | 0.339981000  |
| 6  | -2.927215000 | -2.072835000 | -0.657709000 | 15 | 1.625360000                 | 0.345145000  | 0.872164000  |
| 6  | -4.092366000 | -2.734584000 | -1.047127000 | 6  | 2.029435000                 | -0.990167000 | 2.068377000  |
| 1  | -4.246216000 | -3.763631000 | -0.735468000 | 6  | 2.961610000                 | -0.866816000 | 3.101991000  |
| 6  | -5.057717000 | -2.098160000 | -1.813846000 | 6  | 1.207563000                 | -2.124141000 | 2.036323000  |
| 1  | -5.962869000 | -2.623418000 | -2.103224000 | 6  | 3.102071000                 | -1.882677000 | 4.048507000  |
| 6  | -4.848659000 | -0.787976000 | -2.216908000 | 1  | 3.575217000                 | 0.022887000  | 3.186956000  |
| 1  | -5.595466000 | -0.292447000 | -2.831362000 | 6  | 1.342522000                 | -3.133066000 | 2.979913000  |
| 6  | -3.687944000 | -0.088887000 | -1.874103000 | 1  | 0.458631000                 | -2.217283000 | 1.256241000  |
| 6  | -1.916860000 | -2.813707000 | 0.198199000  | 6  | 2.302234000                 | -3.017712000 | 3.985779000  |
| 1  | -1.302658000 | -2.054973000 | 0.682802000  | 1  | 3.835854000                 | -1.776030000 | 4.841227000  |
| 6  | -0.995984000 | -3.697994000 | -0.650177000 | 1  | 0.705078000                 | -4.010774000 | 2.926242000  |
| 1  | -0.436343000 | -3.120734000 | -1.390984000 | 1  | 2.416020000                 | -3.806143000 | 4.723314000  |
| 1  | -1.577491000 | -4.453183000 | -1.190993000 | 6  | 0.101850000                 | 1.030412000  | 1.330562000  |
| 1  | -0.270652000 | -4.219970000 | -0.010961000 | 17 | 0.119933000                 | 1.841293000  | 2.915040000  |
| 6  | -2.570903000 | -3.643177000 | 1.307249000  | 13 | 0.003401000                 | 0.011222000  | -1.834848000 |
| 1  | -3.340322000 | -3.072376000 | 1.833908000  | 1  | 0.066238000                 | 1.365833000  | -2.640873000 |
| 1  | -1.813916000 | -3.951498000 | 2.037692000  | 1  | 0.396632000                 | -1.426282000 | -2.618476000 |
| 1  | -3.028885000 | -4.555441000 | 0.909353000  | 6  | -0.693365000                | -1.722637000 | -3.658120000 |
| 6  | -3.533071000 | 1.325701000  | -2.409141000 | 8  | -0.434459000                | -2.804173000 | -4.057263000 |
| 1  | -2.531612000 | 1.675714000  | -2.148038000 | 8  | -1.392301000                | -0.739035000 | -3.655030000 |
| 6  | -4.572951000 | 2.266804000  | -1.784643000 |    |                             |              |              |
| 1  | -4.409780000 | 3.294795000  | -2.125286000 |    | <b>4-IM1 (in gas phase)</b> |              |              |
| 1  | -4.533795000 | 2.265109000  | -0.691691000 | 7  | 1.500009000                 | -0.095950000 | -0.631701000 |
| 1  | -5.583820000 | 1.969226000  | -2.087225000 | 7  | -1.469068000                | -0.054205000 | -0.723242000 |
| 6  | -3.657875000 | 1.385848000  | -3.938249000 | 6  | 2.785209000                 | 1.757009000  | 1.130898000  |
| 1  | -2.960395000 | 0.702926000  | -4.423180000 | 6  | 4.114646000                 | 1.332784000  | 1.258336000  |
| 1  | -3.449736000 | 2.404925000  | -4.281436000 | 1  | 4.359449000                 | 0.273886000  | 1.207043000  |
| 1  | -4.674016000 | 1.133654000  | -4.261721000 | 6  | 5.128784000                 | 2.265800000  | 1.456147000  |
| 15 | -1.510872000 | 0.759311000  | 0.763843000  | 1  | 6.155200000                 | 1.929435000  | 1.561017000  |
| 6  | -2.243731000 | 2.429469000  | 0.657336000  | 6  | 4.824114000                 | 3.624265000  | 1.513470000  |
| 6  | -1.732475000 | 3.271592000  | -0.338473000 | 1  | 5.614225000                 | 4.350221000  | 1.679135000  |
| 6  | -3.179735000 | 2.925385000  | 1.566044000  | 6  | 3.511947000                 | 4.052877000  | 1.329011000  |

|   |              |              |              |    |              |              |              |
|---|--------------|--------------|--------------|----|--------------|--------------|--------------|
| 1 | 3.276996000  | 5.112278000  | 1.342084000  | 1  | 1.756210000  | 1.145070000  | -3.897316000 |
| 6 | 2.494404000  | 3.124567000  | 1.127517000  | 1  | 3.317035000  | 1.824168000  | -4.371930000 |
| 1 | 1.472126000  | 3.457446000  | 0.977157000  | 1  | 1.977632000  | 2.903062000  | -3.921038000 |
| 6 | -2.549143000 | -0.333484000 | 1.892647000  | 6  | -2.584351000 | -0.795836000 | -1.263413000 |
| 6 | -3.826512000 | -0.840958000 | 1.605612000  | 6  | -2.682501000 | -2.184858000 | -1.036749000 |
| 1 | -4.330687000 | -0.580146000 | 0.678270000  | 6  | -3.863311000 | -2.837654000 | -1.399211000 |
| 6 | -4.454947000 | -1.691813000 | 2.508614000  | 1  | -3.959862000 | -3.902132000 | -1.201762000 |
| 1 | -5.435698000 | -2.091996000 | 2.271966000  | 6  | -4.904974000 | -2.158003000 | -2.014568000 |
| 6 | -3.824853000 | -2.035671000 | 3.704076000  | 1  | -5.820119000 | -2.679980000 | -2.277289000 |
| 1 | -4.317942000 | -2.704023000 | 4.403431000  | 6  | -4.742140000 | -0.818845000 | -2.347321000 |
| 6 | -2.567604000 | -1.519063000 | 4.002167000  | 1  | -5.521808000 | -0.305749000 | -2.903452000 |
| 1 | -2.073523000 | -1.778386000 | 4.933391000  | 6  | -3.582225000 | -0.121998000 | -2.001979000 |
| 6 | -1.931692000 | -0.666940000 | 3.101351000  | 6  | -1.535349000 | -3.016300000 | -0.486351000 |
| 1 | -0.950237000 | -0.269852000 | 3.338235000  | 1  | -0.667077000 | -2.351813000 | -0.400819000 |
| 6 | 2.811037000  | -0.417924000 | -1.182468000 | 6  | -1.177396000 | -4.147559000 | -1.464356000 |
| 6 | 3.374310000  | -1.706928000 | -1.024890000 | 1  | -1.033945000 | -3.791662000 | -2.486899000 |
| 6 | 4.666278000  | -1.941123000 | -1.509509000 | 1  | -1.965883000 | -4.908171000 | -1.479270000 |
| 1 | 5.104235000  | -2.925930000 | -1.374507000 | 1  | -0.253396000 | -4.639480000 | -1.142687000 |
| 6 | 5.389314000  | -0.963047000 | -2.169673000 | 6  | -1.826933000 | -3.630327000 | 0.888734000  |
| 1 | 6.388371000  | -1.171766000 | -2.539835000 | 1  | -1.966924000 | -2.878071000 | 1.668281000  |
| 6 | 4.806518000  | 0.277887000  | -2.375669000 | 1  | -0.996265000 | -4.284691000 | 1.181928000  |
| 1 | 5.352221000  | 1.040420000  | -2.923141000 | 1  | -2.733664000 | -4.244903000 | 0.849560000  |
| 6 | 3.530817000  | 0.575107000  | -1.895951000 | 6  | -3.375892000 | 1.282591000  | -2.543493000 |
| 6 | 2.672233000  | -2.897061000 | -0.385561000 | 1  | -2.522997000 | 1.726824000  | -2.029199000 |
| 1 | 1.659153000  | -2.589260000 | -0.109681000 | 6  | -4.578983000 | 2.203547000  | -2.331191000 |
| 6 | 3.409154000  | -3.372414000 | 0.875722000  | 1  | -4.333493000 | 3.217908000  | -2.661968000 |
| 1 | 3.562963000  | -2.565275000 | 1.597446000  | 1  | -4.865888000 | 2.251285000  | -1.275588000 |
| 1 | 4.391187000  | -3.779648000 | 0.610358000  | 1  | -5.448445000 | 1.872191000  | -2.909688000 |
| 1 | 2.842131000  | -4.167983000 | 1.370521000  | 6  | -3.003169000 | 1.193427000  | -4.031113000 |
| 6 | 2.565044000  | -4.078874000 | -1.365995000 | 1  | -2.114183000 | 0.571631000  | -4.180352000 |
| 1 | 2.053850000  | -3.821483000 | -2.298194000 | 1  | -2.795821000 | 2.192678000  | -4.428707000 |
| 1 | 2.023524000  | -4.903928000 | -0.890278000 | 1  | -3.824342000 | 0.756351000  | -4.610933000 |
| 1 | 3.559470000  | -4.455169000 | -1.627949000 | 15 | -1.665588000 | 0.737452000  | 0.710148000  |
| 6 | 2.962308000  | 1.943400000  | -2.236875000 | 6  | -2.675873000 | 2.260476000  | 0.648430000  |
| 1 | 2.110855000  | 2.146399000  | -1.583215000 | 6  | -2.180473000 | 3.325208000  | -0.117191000 |
| 6 | 3.969221000  | 3.080359000  | -2.029304000 | 6  | -3.869314000 | 2.419679000  | 1.355834000  |
| 1 | 4.471860000  | 3.001822000  | -1.062740000 | 6  | -2.890826000 | 4.515326000  | -0.201060000 |
| 1 | 3.452219000  | 4.044581000  | -2.073033000 | 1  | -1.238006000 | 3.208627000  | -0.647758000 |
| 1 | 4.734187000  | 3.088177000  | -2.813296000 | 6  | -4.575544000 | 3.619793000  | 1.274976000  |
| 6 | 2.466879000  | 1.950630000  | -3.691477000 | 1  | -4.247593000 | 1.620557000  | 1.983805000  |

|                             |              |              |              |    |              |              |              |
|-----------------------------|--------------|--------------|--------------|----|--------------|--------------|--------------|
| 6                           | -4.092528000 | 4.662516000  | 0.492716000  | 1  | -7.774440000 | -3.034126000 | 0.113183000  |
| 1                           | -2.505644000 | 5.331552000  | -0.804125000 | 1  | -7.019684000 | -3.585670000 | 1.621854000  |
| 1                           | -5.501616000 | 3.735960000  | 1.829066000  | 1  | -6.403013000 | -4.168799000 | 0.068575000  |
| 1                           | -4.645387000 | 5.594758000  | 0.428515000  | 1  | -5.678464000 | -0.145524000 | 1.408916000  |
| 15                          | 1.466949000  | 0.522573000  | 0.905275000  | 1  | -7.366064000 | -0.669753000 | 1.176036000  |
| 6                           | 1.752717000  | -0.731490000 | 2.206372000  | 1  | -6.386335000 | -1.365829000 | 2.487976000  |
| 6                           | 2.606401000  | -0.547626000 | 3.297310000  | 1  | -7.414568000 | -0.763493000 | -1.392543000 |
| 6                           | 0.898549000  | -1.841513000 | 2.191681000  | 1  | -6.065685000 | -0.210373000 | -2.401833000 |
| 6                           | 2.647380000  | -1.493429000 | 4.321934000  | 1  | -6.235438000 | 0.412403000  | -0.752461000 |
| 1                           | 3.235535000  | 0.333135000  | 3.361609000  | 1  | -4.869979000 | -3.592309000 | -1.552587000 |
| 6                           | 0.934232000  | -2.778860000 | 3.214707000  | 1  | -4.981846000 | -2.362558000 | -2.824088000 |
| 1                           | 0.182789000  | -1.957260000 | 1.381326000  | 1  | -6.465719000 | -3.087654000 | -2.165542000 |
| 6                           | 1.822801000  | -2.612307000 | 4.277329000  | 13 | -0.011953000 | -0.569586000 | -1.202738000 |
| 1                           | 3.320898000  | -1.345242000 | 5.160071000  | 7  | -0.521809000 | 0.985701000  | -0.232729000 |
| 1                           | 0.261112000  | -3.630597000 | 3.187002000  | 7  | 1.434164000  | -1.235703000 | -0.171640000 |
| 1                           | 1.857941000  | -3.345847000 | 5.076908000  | 1  | 0.309587000  | -0.235348000 | -2.716987000 |
| 6                           | -0.085721000 | 1.268713000  | 1.201734000  | 6  | -1.901211000 | 1.365920000  | 0.029442000  |
| 17                          | -0.134066000 | 2.217933000  | 2.710891000  | 15 | 0.631206000  | 2.180138000  | -0.268518000 |
| 13                          | 0.037306000  | 0.437004000  | -1.764925000 | 6  | 1.640352000  | -2.666849000 | -0.144132000 |
| 1                           | 0.770791000  | -2.212343000 | -2.134748000 | 15 | 2.660859000  | -0.189470000 | 0.166737000  |
| 6                           | 0.514342000  | -1.868775000 | -3.155703000 | 6  | -2.690124000 | 1.862880000  | -1.033166000 |
| 8                           | 0.116065000  | -0.611780000 | -3.198886000 | 6  | -2.450577000 | 1.252764000  | 1.331444000  |
| 8                           | 0.603852000  | -2.607593000 | -4.103080000 | 6  | 2.182505000  | 1.394797000  | -0.389440000 |
| 1                           | -0.054237000 | 1.960454000  | -2.186387000 | 6  | 0.606478000  | 3.332978000  | -1.696600000 |
|                             |              |              |              | 6  | 0.424295000  | 3.286067000  | 1.162828000  |
|                             |              |              |              | 6  | 2.038239000  | -3.344632000 | -1.323492000 |
|                             |              |              |              | 6  | 1.346376000  | -3.401150000 | 1.025293000  |
|                             |              |              |              | 6  | 4.190650000  | -0.722344000 | -0.660462000 |
|                             |              |              |              | 6  | 3.079299000  | -0.089397000 | 1.946387000  |
|                             |              |              |              | 6  | -3.956797000 | 2.378798000  | -0.750877000 |
|                             |              |              |              | 6  | -2.268591000 | 1.763807000  | -2.491076000 |
|                             |              |              |              | 6  | -3.713041000 | 1.806201000  | 1.559534000  |
|                             |              |              |              | 6  | -1.790886000 | 0.525092000  | 2.502205000  |
|                             |              |              |              | 17 | 3.524358000  | 2.565803000  | -0.467340000 |
|                             |              |              |              | 6  | 0.363441000  | 4.702993000  | -1.570225000 |
|                             |              |              |              | 6  | 0.923051000  | 2.808551000  | -2.957816000 |
|                             |              |              |              | 6  | -0.771195000 | 3.993523000  | 1.364367000  |
|                             |              |              |              | 6  | 1.470291000  | 3.419843000  | 2.080191000  |
|                             |              |              |              | 6  | 2.185415000  | -4.733139000 | -1.281497000 |
|                             |              |              |              | 6  | 2.242286000  | -2.658580000 | -2.667231000 |
| <b>4-TS2 (in gas phase)</b> |              |              |              |    |              |              |              |
| 1                           | -2.586863000 | -1.518703000 | 0.866859000  |    |              |              |              |
| 5                           | -3.595347000 | -1.884861000 | 0.345715000  |    |              |              |              |
| 8                           | -4.588232000 | -2.545688000 | 1.075422000  |    |              |              |              |
| 8                           | -4.150998000 | -1.138988000 | -0.696033000 |    |              |              |              |
| 8                           | -2.674375000 | -3.396834000 | -0.512844000 |    |              |              |              |
| 6                           | -5.853970000 | -2.127555000 | 0.554106000  |    |              |              |              |
| 6                           | -5.488613000 | -1.618215000 | -0.878414000 |    |              |              |              |
| 6                           | -1.580279000 | -3.078515000 | -0.964243000 |    |              |              |              |
| 6                           | -6.821541000 | -3.302062000 | 0.583904000  |    |              |              |              |
| 6                           | -6.360631000 | -1.000994000 | 1.456674000  |    |              |              |              |
| 6                           | -6.357550000 | -0.473274000 | -1.380321000 |    |              |              |              |
| 6                           | -5.456569000 | -2.744080000 | -1.914456000 |    |              |              |              |
| 8                           | -1.212985000 | -1.861365000 | -1.163239000 |    |              |              |              |
| 1                           | -0.846968000 | -3.857128000 | -1.232883000 |    |              |              |              |

|   |              |              |              |   |              |              |              |
|---|--------------|--------------|--------------|---|--------------|--------------|--------------|
| 6 | 1.526366000  | -4.787493000 | 1.017305000  | 1 | -5.433329000 | 2.814360000  | 0.752638000  |
| 6 | 0.789617000  | -2.766885000 | 2.286269000  | 1 | -1.994417000 | 3.912539000  | -2.791779000 |
| 6 | 4.904026000  | -1.812155000 | -0.143977000 | 1 | -3.545989000 | 3.292950000  | -3.390319000 |
| 6 | 4.628519000  | -0.107396000 | -1.837429000 | 1 | -2.061284000 | 2.956911000  | -4.282429000 |
| 6 | 2.024199000  | 0.263597000  | 2.798790000  | 1 | -2.875822000 | -0.334986000 | -2.606006000 |
| 6 | 4.377665000  | -0.141210000 | 2.461106000  | 1 | -2.639213000 | 0.465081000  | -4.187871000 |
| 1 | -4.565241000 | 2.762536000  | -1.565119000 | 1 | -4.082634000 | 0.800381000  | -3.204974000 |
| 6 | -4.454324000 | 2.392407000  | 0.542873000  | 1 | -0.275609000 | 2.006271000  | 3.150558000  |
| 1 | -1.204921000 | 1.531829000  | -2.531393000 | 1 | -0.838290000 | 0.891172000  | 4.407882000  |
| 6 | -2.481498000 | 3.060632000  | -3.276689000 | 1 | -1.877451000 | 2.212913000  | 3.861465000  |
| 6 | -3.005914000 | 0.596843000  | -3.163683000 | 1 | -3.443200000 | -0.947081000 | 2.664517000  |
| 1 | -4.134176000 | 1.757959000  | 2.559481000  | 1 | -3.431828000 | 0.301573000  | 3.924317000  |
| 1 | -1.028448000 | -0.143628000 | 2.080636000  | 1 | -2.248874000 | -0.995719000 | 3.969197000  |
| 6 | -1.144452000 | 1.469384000  | 3.527565000  | 6 | 0.683892000  | 4.996639000  | -3.944497000 |
| 6 | -2.798599000 | -0.332634000 | 3.293333000  | 1 | 0.210200000  | 6.592658000  | -2.581523000 |
| 6 | 0.400043000  | 5.529786000  | -2.692892000 | 1 | 1.185898000  | 3.213989000  | -5.047368000 |
| 1 | 0.162500000  | 5.141153000  | -0.599645000 | 1 | -1.847775000 | 5.338293000  | 2.641727000  |
| 6 | 0.950535000  | 3.633659000  | -4.074307000 | 6 | 0.125095000  | 4.922003000  | 3.404773000  |
| 1 | 1.142627000  | 1.748705000  | -3.055073000 | 1 | 2.131148000  | 4.322880000  | 3.913200000  |
| 1 | -1.591269000 | 3.907894000  | 0.655685000  | 1 | 2.075729000  | -6.534484000 | -0.109844000 |
| 6 | -0.915462000 | 4.805228000  | 2.484275000  | 1 | 0.112087000  | -2.674474000 | -3.198098000 |
| 6 | 1.317372000  | 4.233901000  | 3.200353000  | 1 | 1.036972000  | -4.057370000 | -3.814439000 |
| 1 | 2.397342000  | 2.875720000  | 1.932075000  | 1 | 1.206970000  | -2.458336000 | -4.566780000 |
| 1 | 2.485077000  | -5.257150000 | -2.184858000 | 1 | 4.404311000  | -2.968503000 | -2.641369000 |
| 6 | 1.949859000  | -5.456153000 | -0.120260000 | 1 | 3.756481000  | -2.413908000 | -4.196767000 |
| 1 | 2.262163000  | -1.576593000 | -2.512466000 | 1 | 3.530651000  | -4.090834000 | -3.696609000 |
| 6 | 1.075697000  | -2.980356000 | -3.613142000 | 1 | 1.359907000  | -2.413621000 | 4.352143000  |
| 6 | 3.563975000  | -3.058052000 | -3.332434000 | 1 | 2.742958000  | -2.528821000 | 3.250630000  |
| 1 | 1.306851000  | -5.350439000 | 1.920483000  | 1 | 1.863587000  | -3.992785000 | 3.729994000  |
| 1 | 0.658761000  | -1.702365000 | 2.087214000  | 1 | -1.312090000 | -3.190460000 | 1.824134000  |
| 6 | 1.749454000  | -2.933962000 | 3.470748000  | 1 | -0.984350000 | -2.853498000 | 3.529340000  |
| 6 | -0.590207000 | -3.341899000 | 2.632349000  | 1 | -0.533792000 | -4.416174000 | 2.839424000  |
| 1 | 4.540321000  | -2.336980000 | 0.736495000  | 1 | 6.642390000  | -3.059456000 | -0.337267000 |
| 6 | 6.088872000  | -2.222264000 | -0.750134000 | 6 | 6.554084000  | -1.562892000 | -1.885581000 |
| 6 | 5.812148000  | -0.522769000 | -2.440470000 | 1 | 6.155510000  | -0.029831000 | -3.344282000 |
| 1 | 4.047439000  | 0.699655000  | -2.272134000 | 6 | 3.544765000  | 0.403180000  | 4.661849000  |
| 6 | 2.251886000  | 0.502845000  | 4.146881000  | 1 | 1.423473000  | 0.778645000  | 4.791444000  |
| 1 | 1.019160000  | 0.369724000  | 2.394311000  | 1 | 5.616312000  | 0.042217000  | 4.207063000  |
| 6 | 4.604485000  | 0.093102000  | 3.817532000  | 1 | 0.709003000  | 5.641302000  | -4.817801000 |
| 1 | 5.220849000  | -0.348678000 | 1.812114000  | 1 | 0.004835000  | 5.552232000  | 4.280703000  |



|                             |              |              |              |    |              |              |              |
|-----------------------------|--------------|--------------|--------------|----|--------------|--------------|--------------|
| 1                           | 7.483136000  | -1.876151000 | -2.351806000 | 6  | 2.171163000  | 1.366347000  | -0.420966000 |
| 1                           | 3.724930000  | 0.585796000  | 5.716747000  | 6  | 0.630379000  | 3.341055000  | -1.713490000 |
| <b>4-IM2 (in gas phase)</b> |              |              |              | 6  | 0.456518000  | 3.287821000  | 1.146236000  |
| 1                           | -2.499873000 | -1.426873000 | 0.809784000  | 6  | 1.912255000  | -3.365532000 | -1.334575000 |
| 5                           | -3.440937000 | -1.972259000 | 0.287835000  | 6  | 1.226590000  | -3.409684000 | 1.017039000  |
| 8                           | -4.452487000 | -2.536807000 | 1.109696000  | 6  | 4.145734000  | -0.794220000 | -0.643107000 |
| 8                           | -4.047414000 | -1.283777000 | -0.795734000 | 6  | 3.038556000  | -0.097527000 | 1.940991000  |
| 8                           | -2.615613000 | -3.341704000 | -0.355435000 | 6  | -3.929190000 | 2.532657000  | -0.731264000 |
| 6                           | -5.714392000 | -2.100369000 | 0.609036000  | 6  | -2.293440000 | 1.849883000  | -2.497304000 |
| 6                           | -5.394443000 | -1.746076000 | -0.879431000 | 6  | -3.670794000 | 1.957557000  | 1.577392000  |
| 6                           | -1.559247000 | -3.088023000 | -0.947744000 | 6  | -1.789922000 | 0.596675000  | 2.490231000  |
| 6                           | -6.737873000 | -3.213720000 | 0.790759000  | 17 | 3.534269000  | 2.512105000  | -0.510671000 |
| 6                           | -6.134082000 | -0.866737000 | 1.411741000  | 6  | 0.430766000  | 4.717294000  | -1.577866000 |
| 6                           | -6.255360000 | -0.635223000 | -1.466755000 | 6  | 0.919826000  | 2.813756000  | -2.979929000 |
| 6                           | -5.436882000 | -2.976176000 | -1.791570000 | 6  | -0.718548000 | 4.027406000  | 1.354036000  |
| 8                           | -1.179767000 | -1.914063000 | -1.262668000 | 6  | 1.512330000  | 3.398243000  | 2.055371000  |
| 1                           | -0.906229000 | -3.922669000 | -1.242669000 | 6  | 1.993514000  | -4.759978000 | -1.304561000 |
| 1                           | -7.696890000 | -2.942783000 | 0.333944000  | 6  | 2.165453000  | -2.683546000 | -2.672556000 |
| 1                           | -6.903749000 | -3.385955000 | 1.858581000  | 6  | 1.340363000  | -4.803248000 | 0.995649000  |
| 1                           | -6.385815000 | -4.147605000 | 0.347779000  | 6  | 0.739883000  | -2.761199000 | 2.300160000  |
| 1                           | -5.421146000 | -0.052106000 | 1.248910000  | 6  | 4.822638000  | -1.893626000 | -0.098467000 |
| 1                           | -7.137272000 | -0.520218000 | 1.140120000  | 6  | 4.620527000  | -0.205344000 | -1.818873000 |
| 1                           | -6.128698000 | -1.124196000 | 2.475692000  | 6  | 1.989524000  | 0.264684000  | 2.796671000  |
| 1                           | -7.320797000 | -0.883167000 | -1.394381000 | 6  | 4.341238000  | -0.139293000 | 2.446827000  |
| 1                           | -6.009021000 | -0.499283000 | -2.524692000 | 1  | -4.532849000 | 2.942535000  | -1.536142000 |
| 1                           | -6.069753000 | 0.309824000  | -0.949402000 | 6  | -4.403684000 | 2.571681000  | 0.570979000  |
| 1                           | -4.869578000 | -3.804216000 | -1.357478000 | 1  | -1.240940000 | 1.572026000  | -2.552681000 |
| 1                           | -4.981176000 | -2.711679000 | -2.751167000 | 6  | -2.462580000 | 3.157042000  | -3.276748000 |
| 1                           | -6.464194000 | -3.309523000 | -1.974047000 | 6  | -3.094007000 | 0.720263000  | -3.161408000 |
| 13                          | -0.045129000 | -0.547082000 | -1.226495000 | 1  | -4.076516000 | 1.929163000  | 2.584582000  |
| 7                           | -0.543080000 | 1.011026000  | -0.259630000 | 1  | -1.023024000 | -0.062182000 | 2.062934000  |
| 7                           | 1.375284000  | -1.243193000 | -0.174731000 | 6  | -1.157682000 | 1.522048000  | 3.541153000  |
| 1                           | 0.271141000  | -0.215045000 | -2.740537000 | 6  | -2.807972000 | -0.282969000 | 3.241239000  |
| 6                           | -1.907116000 | 1.434839000  | 0.018375000  | 6  | 0.482722000  | 5.548379000  | -2.696624000 |
| 15                          | 0.635482000  | 2.183013000  | -0.290322000 | 1  | 0.251732000  | 5.156148000  | -0.603355000 |
| 6                           | 1.543806000  | -2.679559000 | -0.149862000 | 6  | 0.962835000  | 3.643619000  | -4.092407000 |
| 15                          | 2.620689000  | -0.217157000 | 0.162169000  | 1  | 1.107090000  | 1.748581000  | -3.084755000 |
| 6                           | -2.689769000 | 1.963085000  | -1.033325000 | 1  | -1.545117000 | 3.963551000  | 0.650623000  |
| 6                           | -2.438574000 | 1.347901000  | 1.329203000  | 6  | -0.833630000 | 4.845166000  | 2.472859000  |
|                             |              |              |              | 6  | 1.388859000  | 4.218948000  | 3.174406000  |



|    |              |              |              |   |              |              |              |
|----|--------------|--------------|--------------|---|--------------|--------------|--------------|
| 6  | 3.949466000  | 0.642280000  | 2.474772000  | 6 | 6.591507000  | -1.139370000 | -1.237437000 |
| 6  | 1.601663000  | 0.271599000  | 2.873378000  | 1 | 6.295710000  | 0.324810000  | -2.788138000 |
| 15 | 0.332130000  | 2.252214000  | -0.453883000 | 6 | 3.012385000  | 1.040714000  | 4.667303000  |
| 17 | 3.183464000  | 2.757623000  | -0.475350000 | 1 | 5.080896000  | 1.347453000  | 4.159299000  |
| 6  | -2.157277000 | 1.538464000  | 0.029103000  | 1 | 0.897017000  | 0.657705000  | 4.863814000  |
| 1  | 1.589867000  | -5.400415000 | 1.709871000  | 6 | -0.975673000 | 4.411874000  | 0.802981000  |
| 6  | 2.216007000  | -5.288891000 | -0.337602000 | 6 | 1.041478000  | 3.620474000  | 1.877269000  |
| 1  | 0.541379000  | -1.884449000 | 2.148822000  | 6 | 0.395871000  | 2.392471000  | -3.202931000 |
| 6  | 2.057144000  | -2.875379000 | 3.320149000  | 6 | 0.192247000  | 4.555328000  | -2.148084000 |
| 6  | -0.257860000 | -3.714103000 | 2.874875000  | 6 | -3.816400000 | 2.256506000  | 1.637579000  |
| 1  | 2.758454000  | -4.875251000 | -2.366651000 | 6 | -1.644316000 | 1.356639000  | 2.531917000  |
| 1  | 2.242323000  | -1.218561000 | -2.414272000 | 6 | -4.322482000 | 2.328082000  | -0.703651000 |
| 6  | 3.797605000  | -2.523744000 | -3.143562000 | 6 | -2.742898000 | 1.549728000  | -2.483472000 |
| 6  | 1.400054000  | -2.620887000 | -3.794974000 | 1 | 7.604667000  | -1.378323000 | -1.545913000 |
| 1  | 4.289613000  | -1.999901000 | 1.105161000  | 1 | 3.138926000  | 1.342930000  | 5.702325000  |
| 6  | 6.016458000  | -1.809655000 | -0.159106000 | 1 | -1.722952000 | 4.331996000  | 0.016278000  |
| 6  | 5.860199000  | -0.179533000 | -1.931490000 | 6 | -1.110816000 | 5.391090000  | 1.783261000  |
| 1  | 3.984024000  | 0.862948000  | -2.092164000 | 6 | 0.894367000  | 4.593294000  | 2.862711000  |
| 6  | 4.103024000  | 1.039016000  | 3.802969000  | 1 | 1.880411000  | 2.931657000  | 1.920840000  |
| 1  | 4.807327000  | 0.655449000  | 1.809963000  | 6 | 0.397749000  | 2.998880000  | -4.451640000 |
| 6  | 1.755637000  | 0.658783000  | 4.198430000  | 1 | 0.493804000  | 1.311515000  | -3.122635000 |
| 1  | 0.624269000  | -0.008237000 | 2.500553000  | 6 | 0.202940000  | 5.161992000  | -3.404275000 |
| 6  | 0.116247000  | 3.533184000  | 0.832112000  | 1 | 0.147015000  | 5.175201000  | -1.259791000 |
| 6  | 0.262957000  | 3.164965000  | -2.040321000 | 1 | -4.119298000 | 2.419934000  | 2.667419000  |
| 6  | -2.552543000 | 1.730626000  | 1.375291000  | 6 | -4.698983000 | 2.564541000  | 0.609098000  |
| 6  | -3.057544000 | 1.818613000  | -1.021731000 | 1 | -0.620654000 | 1.460164000  | 2.173946000  |
| 1  | 2.452095000  | -6.346649000 | -0.408489000 | 6 | -1.863704000 | -0.105819000 | 2.942632000  |
| 1  | 2.912295000  | -2.288042000 | 2.971508000  | 6 | -1.787147000 | 2.277715000  | 3.745646000  |
| 1  | 2.404027000  | -3.896555000 | 3.517445000  | 1 | -5.020215000 | 2.539803000  | -1.509626000 |
| 1  | 1.720973000  | -2.441832000 | 4.268475000  | 1 | -1.697106000 | 1.255016000  | -2.555339000 |
| 1  | -1.116272000 | -3.734611000 | 2.202309000  | 6 | -2.946337000 | 2.789242000  | -3.360891000 |
| 1  | -0.576088000 | -3.265681000 | 3.822623000  | 6 | -3.572822000 | 0.370455000  | -3.004797000 |
| 1  | 0.039360000  | -4.746968000 | 3.088746000  | 1 | -1.956942000 | 6.070141000  | 1.750198000  |
| 1  | 4.526803000  | -2.518675000 | -2.331168000 | 6 | -0.170743000 | 5.488288000  | 2.807733000  |
| 1  | 4.079246000  | -1.755604000 | -3.871365000 | 1 | 1.619140000  | 4.651689000  | 3.668615000  |
| 1  | 3.866937000  | -3.491980000 | -3.652045000 | 6 | 0.292953000  | 4.386426000  | -4.554132000 |
| 1  | 0.377205000  | -2.321368000 | -3.580280000 | 1 | 0.485809000  | 2.389791000  | -5.345793000 |
| 1  | 1.403498000  | -3.699442000 | -3.990071000 | 1 | 0.146837000  | 6.243492000  | -3.477716000 |
| 1  | 1.741085000  | -2.112964000 | -4.704740000 | 1 | -5.681128000 | 2.970008000  | 0.833602000  |
| 1  | 6.572320000  | -2.578629000 | 0.367508000  | 1 | -1.766427000 | -0.797046000 | 2.098611000  |

|   |              |              |              |                         |              |              |              |
|---|--------------|--------------|--------------|-------------------------|--------------|--------------|--------------|
| 1 | -2.869929000 | -0.241739000 | 3.353096000  | <b>5 (in gas phase)</b> |              |              |              |
| 1 | -1.150558000 | -0.401217000 | 3.724198000  | 13                      | 0.000046000  | -0.462193000 | -0.000711000 |
| 1 | -1.762376000 | 3.331250000  | 3.453917000  | 7                       | -1.746002000 | -0.243820000 | 1.044626000  |
| 1 | -0.961471000 | 2.101032000  | 4.443213000  | 7                       | 1.746175000  | -0.241064000 | -1.045341000 |
| 1 | -2.718834000 | 2.089311000  | 4.290856000  | 8                       | -0.837890000 | 0.383284000  | -1.372970000 |
| 1 | -2.631495000 | 2.574429000  | -4.387298000 | 8                       | 0.838638000  | 0.377710000  | 1.374536000  |
| 1 | -2.360455000 | 3.641180000  | -2.999303000 | 6                       | -4.746008000 | -0.912056000 | -1.055083000 |
| 1 | -3.999960000 | 3.088053000  | -3.394475000 | 6                       | -3.067150000 | -2.564874000 | -0.158698000 |
| 1 | -3.418952000 | -0.532844000 | -2.403815000 | 6                       | -2.778708000 | 2.460519000  | 0.791437000  |
| 1 | -3.290507000 | 0.142549000  | -4.038357000 | 6                       | -3.747559000 | 3.329308000  | 1.602641000  |
| 1 | -4.643089000 | 0.612213000  | -2.993019000 | 6                       | -2.089103000 | 3.296701000  | -0.295022000 |
| 1 | -0.277660000 | 6.253773000  | 3.570410000  | 6                       | -2.546279000 | -3.065008000 | -1.511142000 |
| 1 | 0.296314000  | 4.860567000  | -5.530893000 | 6                       | -4.123403000 | -3.524649000 | 0.402056000  |
| 5 | -2.673870000 | -2.730779000 | 0.035236000  | 6                       | -2.973133000 | -0.053524000 | 0.326851000  |
| 8 | -1.784263000 | -3.879365000 | 0.018914000  | 6                       | -1.772808000 | -0.343423000 | 2.348862000  |
| 8 | -3.363587000 | -2.627667000 | 1.245922000  | 6                       | -0.574809000 | -0.319522000 | 3.132576000  |
| 8 | -3.528117000 | -2.522001000 | -1.061961000 | 6                       | 0.629361000  | 0.116319000  | 2.631331000  |
| 6 | -1.011539000 | -4.085021000 | -1.025362000 | 6                       | -3.471586000 | 1.254259000  | 0.175857000  |
| 6 | -4.726667000 | -2.299292000 | 0.932114000  | 6                       | -3.085493000 | -0.402895000 | 3.091026000  |
| 6 | -4.850494000 | -2.761625000 | -0.556705000 | 6                       | 1.822974000  | 0.370478000  | 3.505744000  |
| 1 | -0.546679000 | -5.081231000 | -1.009328000 | 6                       | -5.249322000 | 0.371318000  | -1.221305000 |
| 8 | -0.801791000 | -3.274052000 | -1.898721000 | 6                       | 5.249589000  | 0.368071000  | 1.221957000  |
| 6 | -5.633516000 | -3.041269000 | 1.903546000  | 6                       | 4.612008000  | 1.440700000  | 0.609088000  |
| 6 | -4.908547000 | -0.795248000 | 1.077915000  | 6                       | 3.472133000  | 1.254571000  | -0.173291000 |
| 6 | -5.124977000 | -4.262538000 | -0.682228000 | 6                       | 2.973420000  | -0.052749000 | -0.327283000 |
| 6 | -5.852121000 | -1.974245000 | -1.386464000 | 6                       | 3.602965000  | -1.149601000 | 0.282995000  |
| 1 | -5.479892000 | -2.652250000 | 2.914469000  | 6                       | 4.746055000  | -0.914830000 | 1.052730000  |
| 1 | -5.412998000 | -4.110513000 | 1.913413000  | 6                       | 3.066837000  | -2.565209000 | 0.152477000  |
| 1 | -6.686462000 | -2.897038000 | 1.636481000  | 6                       | 2.779322000  | 2.462305000  | -0.786034000 |
| 1 | -4.643216000 | -0.497632000 | 2.094995000  | 6                       | 3.748466000  | 3.334013000  | -1.593726000 |
| 1 | -4.255835000 | -0.258312000 | 0.382080000  | 6                       | 2.088143000  | 3.294788000  | 0.302265000  |
| 1 | -5.944036000 | -0.491671000 | 0.891519000  | 6                       | 2.545290000  | -3.068077000 | 1.503640000  |
| 1 | -6.144906000 | -4.515733000 | -0.375988000 | 6                       | 4.122998000  | -3.524106000 | -0.409946000 |
| 1 | -4.421255000 | -4.837377000 | -0.071833000 | 6                       | -3.602908000 | -1.148827000 | -0.285961000 |
| 1 | -4.989888000 | -4.554794000 | -1.727350000 | 6                       | 1.772667000  | -0.337168000 | -2.349842000 |
| 1 | -6.867192000 | -2.115083000 | -0.998177000 | 6                       | 0.574449000  | -0.310759000 | -3.133156000 |
| 1 | -5.825817000 | -2.329063000 | -2.421295000 | 6                       | -0.629289000 | 0.124628000  | -2.630468000 |
| 1 | -5.618340000 | -0.907929000 | -1.384604000 | 6                       | -4.611480000 | 1.442402000  | -0.606011000 |
|   |              |              |              | 6                       | 3.085158000  | -0.394946000 | -3.092480000 |
|   |              |              |              | 6                       | -1.823039000 | 0.381611000  | -3.503868000 |





|   |              |              |              |   |                             |              |              |
|---|--------------|--------------|--------------|---|-----------------------------|--------------|--------------|
| 6 | 3.404551000  | 1.473398000  | -0.003414000 | 1 | 3.582009000                 | 1.141690000  | -2.908306000 |
| 6 | 3.097948000  | 0.177421000  | -3.099951000 | 1 | 2.963069000                 | 0.061545000  | -4.175723000 |
| 6 | -1.833434000 | 0.846102000  | -3.496382000 | 1 | 3.774169000                 | -0.597234000 | -2.729227000 |
| 6 | 5.267275000  | 0.478234000  | 1.191277000  | 1 | -2.642942000                | 0.151787000  | -3.244534000 |
| 6 | -5.175725000 | 1.087723000  | -1.074911000 | 1 | -1.618530000                | 0.797960000  | -4.564847000 |
| 6 | -4.349807000 | 2.019118000  | -0.456911000 | 1 | -2.187273000                | 1.849043000  | -3.233307000 |
| 6 | -3.211612000 | 1.622221000  | 0.245478000  | 1 | 6.163941000                 | 0.593497000  | 1.792635000  |
| 6 | -2.921296000 | 0.248038000  | 0.326411000  | 1 | -6.055494000                | 1.414453000  | -1.620901000 |
| 6 | -3.741940000 | -0.708617000 | -0.290804000 | 1 | -4.587849000                | 3.077692000  | -0.527931000 |
| 6 | -4.867400000 | -0.263221000 | -0.989872000 | 1 | -5.508917000                | -0.992370000 | -1.477610000 |
| 6 | -3.411535000 | -2.189309000 | -0.268390000 | 1 | -2.629953000                | -2.347107000 | 0.479914000  |
| 6 | -2.315286000 | 2.683472000  | 0.866913000  | 1 | -1.478880000                | 2.183433000  | 1.366922000  |
| 6 | -3.066959000 | 3.506152000  | 1.921142000  | 1 | -2.394446000                | 4.231734000  | 2.390061000  |
| 6 | -1.724160000 | 3.603833000  | -0.208382000 | 1 | -3.483776000                | 2.870255000  | 2.708461000  |
| 6 | -2.862727000 | -2.630907000 | -1.631116000 | 1 | -3.895348000                | 4.062018000  | 1.468666000  |
| 6 | -4.605685000 | -3.059304000 | 0.137910000  | 1 | -1.083398000                | 4.363192000  | 0.252111000  |
| 6 | 3.667869000  | -0.961733000 | 0.065783000  | 1 | -2.516417000                | 4.124024000  | -0.758482000 |
| 6 | -1.774110000 | -0.377727000 | 2.294034000  | 1 | -1.128942000                | 3.028606000  | -0.923511000 |
| 6 | -0.606490000 | -0.518526000 | 3.105659000  | 1 | -2.516237000                | -3.667539000 | -1.587614000 |
| 6 | 0.647786000  | -0.164298000 | 2.666494000  | 1 | -2.012551000                | -2.011592000 | -1.931671000 |
| 6 | 4.558982000  | 1.597524000  | 0.770481000  | 1 | -3.645096000                | -2.547097000 | -2.395504000 |
| 6 | -3.111481000 | -0.449547000 | 2.989939000  | 1 | -4.285321000                | -4.100689000 | 0.238790000  |
| 6 | 1.831973000  | -0.065729000 | 3.582440000  | 1 | -5.400109000                | -3.029778000 | -0.615327000 |
| 1 | -0.481719000 | -2.814943000 | 1.450730000  | 1 | -5.037665000                | -2.737287000 | 1.091506000  |
| 1 | 5.375808000  | -1.664067000 | 1.162116000  | 1 | -0.739368000                | -0.761537000 | 4.151681000  |
| 1 | 2.318475000  | -2.296487000 | -0.913975000 | 1 | 4.905715000                 | 2.588244000  | 1.053201000  |
| 1 | 1.861494000  | 2.441372000  | -1.125356000 | 1 | -3.631327000                | 0.510516000  | 2.914481000  |
| 1 | 2.942900000  | 4.605313000  | -1.443608000 | 1 | -2.991590000                | -0.708611000 | 4.042098000  |
| 1 | 4.083017000  | 3.336543000  | -1.930498000 | 1 | -3.751129000                | -1.193132000 | 2.503931000  |
| 1 | 4.281788000  | 4.163778000  | -0.380652000 | 1 | 2.641552000                 | -0.689602000 | 3.187984000  |
| 1 | 1.385156000  | 4.238902000  | 0.527044000  | 1 | 1.594781000                 | -0.360165000 | 4.605708000  |
| 1 | 2.668138000  | 3.613344000  | 1.579060000  | 1 | 2.198008000                 | 0.966753000  | 3.570535000  |
| 1 | 1.234536000  | 2.620846000  | 1.256610000  | 6 | -0.328254000                | -3.072369000 | 0.381626000  |
| 1 | 2.286035000  | -4.045741000 | 0.787518000  | 8 | -0.000099000                | -2.047921000 | -0.372443000 |
| 1 | 2.020575000  | -2.478121000 | 1.571594000  | 8 | -0.453347000                | -4.207273000 | -0.010461000 |
| 1 | 3.605966000  | -3.259880000 | 1.684422000  |   |                             |              |              |
| 1 | 3.869872000  | -4.173336000 | -1.247169000 |   | <b>5-TS2</b> (in gas phase) |              |              |
| 1 | 5.149159000  | -3.337676000 | -0.356876000 | 1 | 2.089966000                 | -0.407867000 | -3.339981000 |
| 1 | 4.593388000  | -2.697110000 | -1.908983000 | 6 | 1.856061000                 | -0.620846000 | -2.284048000 |
| 1 | 0.708481000  | 0.212633000  | -4.261091000 | 8 | 0.739395000                 | -0.129337000 | -1.903755000 |

|    |              |              |              |   |              |              |              |
|----|--------------|--------------|--------------|---|--------------|--------------|--------------|
| 8  | 2.657978000  | -1.294517000 | -1.637715000 | 6 | 1.677358000  | 1.836452000  | 2.403700000  |
| 5  | 3.088495000  | -1.137403000 | 0.275570000  | 6 | -3.205302000 | -4.750853000 | -0.231627000 |
| 8  | 3.490598000  | 0.204346000  | 0.355158000  | 6 | -0.161358000 | 5.201812000  | 1.069550000  |
| 8  | 4.190746000  | -1.989207000 | 0.353537000  | 6 | -1.049712000 | 4.358897000  | 1.729953000  |
| 6  | 4.910530000  | 0.231775000  | 0.149583000  | 6 | -1.482090000 | 3.167213000  | 1.145413000  |
| 6  | 5.339501000  | -1.187479000 | 0.645662000  | 6 | -1.034950000 | 2.864112000  | -0.153893000 |
| 6  | 6.553162000  | -1.769558000 | -0.064652000 | 6 | -0.083144000 | 3.662337000  | -0.804691000 |
| 6  | 5.545656000  | -1.235106000 | 2.161503000  | 6 | 0.335445000  | 4.837183000  | -0.173814000 |
| 6  | 5.189732000  | 0.446996000  | -1.339628000 | 6 | 0.563471000  | 3.242364000  | -2.113748000 |
| 6  | 5.489213000  | 1.392236000  | 0.948200000  | 6 | -2.385822000 | 2.208133000  | 1.908903000  |
| 1  | 5.115948000  | 2.336026000  | 0.537153000  | 6 | -3.866213000 | 2.406938000  | 1.551227000  |
| 1  | 5.198775000  | 1.338075000  | 2.000009000  | 6 | -2.196517000 | 2.300062000  | 3.425377000  |
| 1  | 6.583177000  | 1.401257000  | 0.886818000  | 6 | 2.020952000  | 2.826659000  | -1.856623000 |
| 1  | 4.657881000  | 1.346641000  | -1.666893000 | 6 | 0.496560000  | 4.338866000  | -3.182777000 |
| 1  | 4.833919000  | -0.398653000 | -1.931360000 | 6 | -1.067131000 | -3.602928000 | -0.245797000 |
| 1  | 6.259565000  | 0.590477000  | -1.524436000 | 6 | -2.617226000 | 1.838724000  | -1.570011000 |
| 1  | 6.366222000  | -1.881824000 | -1.134241000 | 6 | -3.271412000 | 0.781750000  | -2.241656000 |
| 1  | 6.777067000  | -2.757871000 | 0.347465000  | 6 | -2.779129000 | -0.513778000 | -2.286725000 |
| 1  | 7.432221000  | -1.130809000 | 0.078231000  | 6 | -3.817837000 | -3.610120000 | 0.280284000  |
| 1  | 6.451405000  | -0.702875000 | 2.469949000  | 6 | -3.182681000 | 3.222908000  | -1.792375000 |
| 1  | 5.631502000  | -2.281033000 | 2.468513000  | 6 | -3.488205000 | -1.610279000 | -3.028464000 |
| 1  | 4.684848000  | -0.797513000 | 2.677795000  | 1 | -1.378222000 | -5.598921000 | -0.972823000 |
| 13 | -0.515675000 | 0.008816000  | -0.596653000 | 1 | 0.803362000  | -2.595790000 | -0.422070000 |
| 7  | -0.894111000 | -1.354105000 | 0.751534000  | 1 | -3.195593000 | -0.341880000 | 0.633151000  |
| 7  | -1.542934000 | 1.675669000  | -0.802781000 | 1 | -4.409202000 | -0.242206000 | 2.892230000  |
| 8  | -1.689902000 | -0.865924000 | -1.719025000 | 1 | -2.768397000 | -0.893377000 | 2.972551000  |
| 8  | 0.602610000  | 0.880102000  | 0.549588000  | 1 | -4.164594000 | -1.990493000 | 3.019859000  |
| 6  | -1.847762000 | -4.730329000 | -0.517576000 | 1 | -5.571781000 | -0.047635000 | 0.711104000  |
| 6  | 0.380411000  | -3.562603000 | -0.699802000 | 1 | -5.877982000 | -1.764151000 | 0.981516000  |
| 6  | -3.766637000 | -1.188295000 | 1.038925000  | 1 | -5.233190000 | -1.214870000 | -0.579620000 |
| 6  | -3.770464000 | -1.071482000 | 2.570376000  | 1 | 1.489651000  | -3.562111000 | -2.559200000 |
| 6  | -5.194930000 | -1.054015000 | 0.502731000  | 1 | -0.145558000 | -2.869387000 | -2.691782000 |
| 6  | 0.451228000  | -3.662802000 | -2.229072000 | 1 | 0.070171000  | -4.628340000 | -2.581350000 |
| 6  | 1.252828000  | -4.636698000 | -0.044159000 | 1 | 2.297870000  | -4.490168000 | -0.334755000 |
| 6  | -1.684658000 | -2.501752000 | 0.363935000  | 1 | 0.945002000  | -5.643130000 | -0.351701000 |
| 6  | -0.430161000 | -1.348516000 | 2.001868000  | 1 | 1.201514000  | -4.587919000 | 1.048014000  |
| 6  | 0.309791000  | -0.284664000 | 2.558780000  | 1 | 0.586835000  | -0.350704000 | 3.602612000  |
| 6  | 0.814178000  | 0.767865000  | 1.807503000  | 1 | -0.398889000 | -2.310155000 | 3.925616000  |
| 6  | -3.077655000 | -2.461191000 | 0.564043000  | 1 | 0.027829000  | -3.350536000 | 2.553582000  |
| 6  | -0.642757000 | -2.551721000 | 2.890457000  | 1 | -1.660062000 | -2.942322000 | 2.834274000  |



|                             |              |              |              |    |              |              |              |
|-----------------------------|--------------|--------------|--------------|----|--------------|--------------|--------------|
| 1                           | 2.664145000  | 1.751554000  | 1.937551000  | 6  | 5.156202000  | -0.911835000 | 0.530032000  |
| 1                           | 1.762304000  | 1.742670000  | 3.488041000  | 6  | 6.548979000  | -1.339563000 | 0.088615000  |
| 1                           | 1.260533000  | 2.815437000  | 2.141802000  | 6  | 4.865579000  | -1.429424000 | 1.943276000  |
| 1                           | -3.795267000 | -5.638839000 | -0.437538000 | 6  | 5.499093000  | 1.218242000  | -0.857394000 |
| 1                           | 0.164709000  | 6.124566000  | 1.539657000  | 6  | 5.272451000  | 1.438344000  | 1.623905000  |
| 1                           | -1.393050000 | 4.623510000  | 2.725014000  | 1  | 5.061868000  | 2.497982000  | 1.442969000  |
| 1                           | 1.071059000  | 5.468972000  | -0.664625000 | 1  | 4.713111000  | 1.124384000  | 2.508835000  |
| 1                           | 0.033436000  | 2.364734000  | -2.496822000 | 1  | 6.344033000  | 1.336727000  | 1.830409000  |
| 1                           | -2.097169000 | 1.189862000  | 1.614743000  | 1  | 5.061383000  | 2.207647000  | -1.024781000 |
| 1                           | -4.505708000 | 1.824991000  | 2.223097000  | 1  | 5.282447000  | 0.594626000  | -1.728829000 |
| 1                           | -4.089310000 | 2.091646000  | 0.527059000  | 1  | 6.584498000  | 1.328789000  | -0.759421000 |
| 1                           | -4.144187000 | 3.462248000  | 1.656904000  | 1  | 6.712644000  | -1.106142000 | -0.965573000 |
| 1                           | -2.714706000 | 1.467196000  | 3.910895000  | 1  | 6.658419000  | -2.420701000 | 0.217979000  |
| 1                           | -2.615579000 | 3.227203000  | 3.831783000  | 1  | 7.321289000  | -0.842839000 | 0.687289000  |
| 1                           | -1.137459000 | 2.248581000  | 3.697779000  | 1  | 5.620076000  | -1.106432000 | 2.668771000  |
| 1                           | 2.468212000  | 2.434579000  | -2.778059000 | 1  | 4.852472000  | -2.523199000 | 1.915497000  |
| 1                           | 2.091495000  | 2.060797000  | -1.077396000 | 1  | 3.880188000  | -1.082592000 | 2.275168000  |
| 1                           | 2.613813000  | 3.693737000  | -1.539685000 | 13 | -0.502639000 | 0.008353000  | -0.632768000 |
| 1                           | 0.918377000  | 3.973088000  | -4.124270000 | 7  | -0.612879000 | -1.454358000 | 0.659698000  |
| 1                           | 1.073023000  | 5.221528000  | -2.885906000 | 7  | -1.769043000 | 1.514382000  | -0.742720000 |
| 1                           | -0.532106000 | 4.661876000  | -3.373540000 | 8  | -1.561075000 | -0.999791000 | -1.750365000 |
| 1                           | -4.174235000 | 1.010868000  | -2.791869000 | 8  | 0.513516000  | 1.011625000  | 0.490861000  |
| 1                           | -4.891071000 | -3.611096000 | 0.444433000  | 6  | -1.252746000 | -4.895618000 | -0.615593000 |
| 1                           | -3.281518000 | 3.782547000  | -0.860292000 | 6  | 0.807917000  | -3.448472000 | -0.922078000 |
| 1                           | -4.151486000 | 3.166271000  | -2.289743000 | 6  | -3.483848000 | -1.624161000 | 1.104365000  |
| 1                           | -2.494567000 | 3.788893000  | -2.430568000 | 6  | -3.438447000 | -1.517232000 | 2.636047000  |
| 1                           | -2.846569000 | -1.965889000 | -3.841010000 | 6  | -4.939859000 | -1.663007000 | 0.629041000  |
| 1                           | -4.445863000 | -1.283928000 | -3.437395000 | 6  | 1.055212000  | -4.175827000 | -2.247221000 |
| 1                           | -3.639633000 | -2.451662000 | -2.342330000 | 6  | 1.910272000  | -3.800430000 | 0.084368000  |
| 1                           | 2.022395000  | -1.467726000 | 0.696097000  | 6  | -1.300069000 | -2.672537000 | 0.291669000  |
|                             |              |              |              | 6  | -0.063272000 | -1.438992000 | 1.877435000  |
|                             |              |              |              | 6  | 0.624855000  | -0.330119000 | 2.410353000  |
|                             |              |              |              | 6  | 0.884836000  | 0.838877000  | 1.704744000  |
|                             |              |              |              | 6  | -2.669279000 | -2.801413000 | 0.582353000  |
|                             |              |              |              | 6  | -0.167492000 | -2.657727000 | 2.769481000  |
|                             |              |              |              | 6  | 1.597177000  | 2.002914000  | 2.319420000  |
|                             |              |              |              | 6  | -2.573479000 | -5.085759000 | -0.227941000 |
|                             |              |              |              | 6  | -0.823357000 | 5.173278000  | 1.155586000  |
|                             |              |              |              | 6  | -1.528807000 | 4.188796000  | 1.839802000  |
|                             |              |              |              | 6  | -1.812121000 | 2.958766000  | 1.244008000  |
| <b>5-IM2 (in gas phase)</b> |              |              |              |    |              |              |              |
| 1                           | 1.912158000  | 0.376201000  | -3.591645000 | 6  | 0.884836000  | 0.838877000  | 1.704744000  |
| 6                           | 1.826635000  | 0.107877000  | -2.530404000 | 6  | -2.669279000 | -2.801413000 | 0.582353000  |
| 8                           | 0.660725000  | 0.175572000  | -2.052215000 | 6  | -0.167492000 | -2.657727000 | 2.769481000  |
| 8                           | 2.887626000  | -0.232304000 | -1.973734000 | 6  | 1.597177000  | 2.002914000  | 2.319420000  |
| 5                           | 3.070707000  | -0.581259000 | -0.375431000 | 6  | -2.573479000 | -5.085759000 | -0.227941000 |
| 8                           | 3.453496000  | 0.641911000  | 0.273471000  | 6  | -0.823357000 | 5.173278000  | 1.155586000  |
| 8                           | 4.190741000  | -1.473728000 | -0.347987000 | 6  | -1.528807000 | 4.188796000  | 1.839802000  |
| 6                           | 4.873641000  | 0.617047000  | 0.404663000  | 6  | -1.812121000 | 2.958766000  | 1.244008000  |

|   |              |              |              |    |              |              |              |
|---|--------------|--------------|--------------|----|--------------|--------------|--------------|
| 6 | -1.407581000 | 2.754074000  | -0.088144000 | 1  | -1.845874000 | 4.375301000  | 2.860902000  |
| 6 | -0.633159000 | 3.705688000  | -0.767427000 | 1  | 0.237016000  | 5.665738000  | -0.640530000 |
| 6 | -0.360249000 | 4.917313000  | -0.126510000 | 1  | -0.400940000 | 2.477021000  | -2.498813000 |
| 6 | -0.003713000 | 3.424420000  | -2.120999000 | 1  | -2.124175000 | 0.903338000  | 1.678547000  |
| 6 | -2.524405000 | 1.865190000  | 2.026967000  | 1  | -4.560903000 | 1.215991000  | 2.455195000  |
| 6 | -4.037603000 | 1.882732000  | 1.762710000  | 1  | -4.280676000 | 1.561335000  | 0.744808000  |
| 6 | -2.251107000 | 1.938976000  | 3.531573000  | 1  | -4.435090000 | 2.893895000  | 1.909579000  |
| 6 | 1.515402000  | 3.263692000  | -1.947430000 | 1  | -2.637249000 | 1.038591000  | 4.019184000  |
| 6 | -0.313313000 | 4.512622000  | -3.155329000 | 1  | -2.748620000 | 2.798093000  | 3.994507000  |
| 6 | -0.597538000 | -3.683388000 | -0.387853000 | 1  | -1.178010000 | 2.005870000  | 3.738189000  |
| 6 | -2.893306000 | 1.526615000  | -1.451915000 | 1  | 1.981334000  | 2.976997000  | -2.897961000 |
| 6 | -3.410596000 | 0.393966000  | -2.122188000 | 1  | 1.760897000  | 2.512215000  | -1.189509000 |
| 6 | -2.727123000 | -0.806499000 | -2.239775000 | 1  | 1.964671000  | 4.213640000  | -1.634940000 |
| 6 | -3.283165000 | -4.032637000 | 0.336394000  | 1  | 0.112701000  | 4.242296000  | -4.126782000 |
| 6 | -3.676073000 | 2.810238000  | -1.607262000 | 1  | 0.119837000  | 5.475181000  | -2.863604000 |
| 6 | -3.306678000 | -1.982980000 | -2.970837000 | 1  | -1.390580000 | 4.658123000  | -3.285239000 |
| 1 | -0.724358000 | -5.698356000 | -1.120559000 | 1  | -4.369719000 | 0.490211000  | -2.613355000 |
| 1 | 0.895636000  | -2.378023000 | -1.132002000 | 1  | -4.334385000 | -4.164804000 | 0.573274000  |
| 1 | -3.039123000 | -0.711687000 | 0.684280000  | 1  | -3.790773000 | 3.341404000  | -0.660643000 |
| 1 | -4.188629000 | -0.806044000 | 2.996167000  | 1  | -4.658200000 | 2.611135000  | -2.037475000 |
| 1 | -2.461683000 | -1.179028000 | 2.995089000  | 1  | -3.129112000 | 3.478504000  | -2.282117000 |
| 1 | -3.658169000 | -2.490009000 | 3.091682000  | 1  | -2.653620000 | -2.240914000 | -3.810356000 |
| 1 | -5.425056000 | -0.708391000 | 0.855987000  | 1  | -4.315336000 | -1.788244000 | -3.338789000 |
| 1 | -5.511859000 | -2.448245000 | 1.135187000  | 1  | -3.316441000 | -2.842824000 | -2.290431000 |
| 1 | -5.004701000 | -1.830728000 | -0.450910000 | 1  | 2.001021000  | -1.020697000 | -0.036796000 |
| 1 | 1.990067000  | -3.814563000 | -2.686402000 |    |              |              |              |
| 1 | 0.242548000  | -3.996762000 | -2.958804000 |    |              |              |              |
| 1 | 1.159077000  | -5.257670000 | -2.107996000 | 13 | -0.084197000 | 0.036826000  | -0.095225000 |
| 1 | 2.895096000  | -3.665944000 | -0.372085000 | 7  | -1.029673000 | -1.364847000 | 0.959250000  |
| 1 | 1.803973000  | -4.839955000 | 0.419298000  | 7  | -1.138656000 | 1.526601000  | -0.871431000 |
| 1 | 1.891191000  | -3.138888000 | 0.954472000  | 8  | -0.380655000 | -0.986679000 | -1.615379000 |
| 1 | 0.998760000  | -0.406762000 | 3.422670000  | 8  | 0.133364000  | 1.046485000  | 1.453278000  |
| 1 | 0.285987000  | -2.456401000 | 3.740389000  | 6  | -1.146462000 | -4.764802000 | -0.543135000 |
| 1 | 0.343259000  | -3.507737000 | 2.309672000  | 6  | 0.875147000  | -3.409710000 | 0.194789000  |
| 1 | -1.206080000 | -2.962710000 | 2.913187000  | 6  | -3.769930000 | -1.371199000 | -0.025933000 |
| 1 | 2.478789000  | 2.204642000  | 1.705815000  | 6  | -4.472154000 | -1.272809000 | 1.337516000  |
| 1 | 1.893322000  | 1.807818000  | 3.351975000  | 6  | -4.809273000 | -1.328731000 | -1.150579000 |
| 1 | 0.937626000  | 2.878062000  | 2.278722000  | 6  | 1.699570000  | -4.212885000 | -0.812660000 |
| 1 | -3.061663000 | -6.039705000 | -0.402947000 | 6  | 1.346731000  | -3.721172000 | 1.619883000  |
| 1 | -0.611574000 | 6.124227000  | 1.634595000  | 6  | -1.516384000 | -2.537339000 | 0.270080000  |

**5-TS3** (in gas phase)

|   |              |              |              |   |              |              |              |
|---|--------------|--------------|--------------|---|--------------|--------------|--------------|
| 6 | -1.166053000 | -1.386098000 | 2.282892000  | 1 | 1.047115000  | -4.732445000 | 1.922202000  |
| 6 | -0.765628000 | -0.327779000 | 3.130825000  | 1 | 0.950240000  | -3.007304000 | 2.348794000  |
| 6 | -0.138686000 | 0.825657000  | 2.681813000  | 1 | -0.939198000 | -0.437022000 | 4.193005000  |
| 6 | -2.862092000 | -2.591087000 | -0.127584000 | 1 | -1.858041000 | -2.418435000 | 4.041382000  |
| 6 | -1.755644000 | -2.600689000 | 2.971076000  | 1 | -1.105817000 | -3.467706000 | 2.819523000  |
| 6 | 0.288780000  | 1.911385000  | 3.628528000  | 1 | -2.729035000 | -2.869293000 | 2.557476000  |
| 6 | -2.501813000 | -4.884596000 | -0.832370000 | 1 | 1.382153000  | 1.978661000  | 3.617120000  |
| 6 | -0.945494000 | 5.282411000  | 1.054601000  | 1 | -0.052224000 | 1.732840000  | 4.649718000  |
| 6 | -1.895357000 | 4.342995000  | 1.445914000  | 1 | -0.099543000 | 2.867926000  | 3.261872000  |
| 6 | -1.967388000 | 3.093382000  | 0.830116000  | 1 | -2.892831000 | -5.813787000 | -1.235852000 |
| 6 | -1.067614000 | 2.813426000  | -0.215744000 | 1 | -0.903051000 | 6.249613000  | 1.546383000  |
| 6 | -0.086766000 | 3.735932000  | -0.607321000 | 1 | -2.583324000 | 4.585442000  | 2.249938000  |
| 6 | -0.047091000 | 4.972192000  | 0.045036000  | 1 | 0.709817000  | 5.696799000  | -0.242384000 |
| 6 | 0.971131000  | 3.394657000  | -1.641146000 | 1 | 0.670441000  | 2.490577000  | -2.177741000 |
| 6 | -3.006391000 | 2.070982000  | 1.266174000  | 1 | -2.551246000 | 1.076235000  | 1.171391000  |
| 6 | -4.239280000 | 2.126163000  | 0.351007000  | 1 | -5.047687000 | 1.505913000  | 0.750776000  |
| 6 | -3.439650000 | 2.230021000  | 2.725767000  | 1 | -4.015754000 | 1.770884000  | -0.659736000 |
| 6 | 2.288380000  | 3.068874000  | -0.926427000 | 1 | -4.610060000 | 3.155300000  | 0.279513000  |
| 6 | 1.178308000  | 4.503900000  | -2.677017000 | 1 | -4.044022000 | 1.367535000  | 3.024391000  |
| 6 | -0.622259000 | -3.586381000 | -0.008202000 | 1 | -4.054413000 | 3.125366000  | 2.870380000  |
| 6 | -1.801511000 | 1.477602000  | -2.018969000 | 1 | -2.578855000 | 2.291126000  | 3.399293000  |
| 6 | -1.955025000 | 0.298424000  | -2.789385000 | 1 | 3.037636000  | 2.715802000  | -1.639240000 |
| 6 | -1.242471000 | -0.864263000 | -2.558564000 | 1 | 2.142031000  | 2.270157000  | -0.192681000 |
| 6 | -3.343014000 | -3.793021000 | -0.657042000 | 1 | 2.668773000  | 3.957279000  | -0.405374000 |
| 6 | -2.407925000 | 2.732246000  | -2.603403000 | 1 | 1.863766000  | 4.153681000  | -3.454587000 |
| 6 | -1.412686000 | -2.080229000 | -3.423431000 | 1 | 1.620600000  | 5.399981000  | -2.227810000 |
| 1 | 1.751112000  | -1.256535000 | -3.751125000 | 1 | 0.238363000  | 4.800633000  | -3.155330000 |
| 1 | -0.480470000 | -5.595709000 | -0.753694000 | 1 | -2.601057000 | 0.343155000  | -3.656341000 |
| 1 | 1.104080000  | -2.357587000 | 0.003790000  | 1 | -4.385241000 | -3.870162000 | -0.951200000 |
| 1 | -3.132144000 | -0.485965000 | -0.146948000 | 1 | -2.858016000 | 3.373753000  | -1.844400000 |
| 1 | -5.280691000 | -0.535927000 | 1.302254000  | 1 | -3.150599000 | 2.479881000  | -3.361672000 |
| 1 | -3.783902000 | -0.971733000 | 2.133644000  | 1 | -1.609058000 | 3.309894000  | -3.084257000 |
| 1 | -4.916722000 | -2.237748000 | 1.609210000  | 1 | -0.443844000 | -2.367639000 | -3.844131000 |
| 1 | -5.294918000 | -0.347602000 | -1.164831000 | 1 | -2.128214000 | -1.919252000 | -4.231584000 |
| 1 | -5.594760000 | -2.078830000 | -1.006880000 | 1 | -1.748566000 | -2.910850000 | -2.791039000 |
| 1 | -4.344374000 | -1.495902000 | -2.127285000 | 6 | 2.085768000  | -0.601952000 | -2.931871000 |
| 1 | 2.739789000  | -3.881529000 | -0.759007000 | 8 | 1.962385000  | 0.592744000  | -2.946473000 |
| 1 | 1.340955000  | -4.047720000 | -1.833688000 | 8 | 2.630570000  | -1.335699000 | -1.961912000 |
| 1 | 1.671983000  | -5.288359000 | -0.600407000 | 1 | 1.513767000  | -0.042762000 | -0.280420000 |
| 1 | 2.438527000  | -3.654866000 | 1.656761000  | 5 | 3.171305000  | -0.756715000 | -0.797895000 |

|                         |              |              |              |   |              |              |              |
|-------------------------|--------------|--------------|--------------|---|--------------|--------------|--------------|
| 8                       | 3.935474000  | 0.388254000  | -0.777824000 | 6 | -2.691782000 | -1.159452000 | -0.645490000 |
| 8                       | 3.438657000  | -1.601774000 | 0.263571000  | 6 | -3.503363000 | -1.637606000 | 0.398987000  |
| 6                       | 4.872162000  | 0.241766000  | 0.304911000  | 6 | -4.751187000 | -2.163523000 | 0.065891000  |
| 6                       | 4.174498000  | -0.819606000 | 1.221102000  | 6 | -5.180182000 | -2.197341000 | -1.257546000 |
| 6                       | 5.127115000  | -1.738666000 | 1.970016000  | 6 | -4.376540000 | -1.686180000 | -2.268631000 |
| 6                       | 3.173255000  | -0.190824000 | 2.190669000  | 6 | -3.121214000 | -1.143809000 | -1.982188000 |
| 6                       | 6.175119000  | -0.276274000 | -0.303464000 | 6 | -2.254754000 | -0.569036000 | -3.091640000 |
| 6                       | 5.093748000  | 1.598916000  | 0.954041000  | 6 | -3.037477000 | 0.387597000  | -3.996895000 |
| 1                       | 5.562832000  | 2.274219000  | 0.232467000  | 6 | -1.612922000 | -1.693932000 | -3.914955000 |
| 1                       | 4.149938000  | 2.046151000  | 1.272112000  | 6 | -3.009929000 | -1.604252000 | 1.836882000  |
| 1                       | 5.756286000  | 1.507506000  | 1.822003000  | 6 | -2.280693000 | -2.910274000 | 2.182445000  |
| 1                       | 6.497538000  | 0.418229000  | -1.083721000 | 6 | -4.126745000 | -1.338581000 | 2.849128000  |
| 1                       | 6.023868000  | -1.259197000 | -0.760445000 | 1 | 0.931690000  | -2.665150000 | 1.684170000  |
| 1                       | 6.968597000  | -0.354796000 | 0.446194000  | 1 | 1.338474000  | -1.833923000 | 3.986695000  |
| 1                       | 5.736261000  | -2.326402000 | 1.280336000  | 1 | 3.054248000  | -1.599488000 | 3.603180000  |
| 1                       | 4.553246000  | -2.429018000 | 2.595724000  | 1 | 1.821978000  | -0.624800000 | 2.787043000  |
| 1                       | 5.788932000  | -1.158119000 | 2.621988000  | 1 | 1.288326000  | -4.286561000 | 3.398666000  |
| 1                       | 3.688533000  | 0.314950000  | 3.014508000  | 1 | 3.042694000  | -4.172057000 | 3.282342000  |
| 1                       | 2.540319000  | -0.982801000 | 2.606699000  | 1 | 2.113381000  | -4.876869000 | 1.943939000  |
| 1                       | 2.524141000  | 0.524498000  | 1.678492000  | 1 | 4.403874000  | -3.867232000 | 1.588576000  |
|                         |              |              |              | 1 | 5.979383000  | -3.364895000 | -0.233202000 |
| <b>6 (in gas phase)</b> |              |              |              | 1 | 5.431406000  | -1.678018000 | -1.935816000 |
| 7                       | -1.366897000 | -0.683416000 | -0.325588000 | 1 | 2.673588000  | 0.705697000  | -1.673022000 |
| 6                       | -1.242458000 | 0.675496000  | -0.038299000 | 1 | 5.118436000  | 0.752599000  | -2.286777000 |
| 6                       | 1.239617000  | 0.475258000  | 0.412436000  | 1 | 4.015143000  | 1.188146000  | -3.602974000 |
| 7                       | 1.371920000  | -0.792272000 | 0.035395000  | 1 | 4.773521000  | -0.402716000 | -3.588707000 |
| 6                       | 2.656959000  | -1.451900000 | -0.013883000 | 1 | 1.837968000  | -0.025457000 | -3.902547000 |
| 6                       | 2.934385000  | -2.426919000 | 0.958114000  | 1 | 2.495380000  | -1.651017000 | -3.615053000 |
| 6                       | 1.957058000  | -2.703952000 | 2.092586000  | 1 | 1.166844000  | -1.031423000 | -2.622915000 |
| 6                       | 2.045487000  | -1.622763000 | 3.178326000  | 1 | 3.295189000  | 0.562731000  | 1.018275000  |
| 6                       | 2.114116000  | -4.094516000 | 2.708159000  | 1 | 2.209397000  | 1.669307000  | 1.899830000  |
| 6                       | 4.150010000  | -3.107479000 | 0.857642000  | 1 | -2.168761000 | 2.588942000  | 0.137614000  |
| 6                       | 5.038404000  | -2.828050000 | -0.172873000 | 1 | -3.242447000 | 1.176463000  | -0.395669000 |
| 6                       | 4.726474000  | -1.873013000 | -1.135318000 | 1 | -5.399385000 | -2.549452000 | 0.846218000  |
| 6                       | 3.523064000  | -1.169339000 | -1.085681000 | 1 | -6.152125000 | -2.615415000 | -1.499006000 |
| 6                       | 3.138714000  | -0.160405000 | -2.161506000 | 1 | -4.730893000 | -1.704953000 | -3.295157000 |
| 6                       | 4.336653000  | 0.371744000  | -2.950408000 | 1 | -1.453633000 | 0.018180000  | -2.625860000 |
| 6                       | 2.102553000  | -0.753087000 | -3.128200000 | 1 | -2.362433000 | 0.859761000  | -4.717364000 |
| 6                       | 2.439295000  | 1.228545000  | 0.926999000  | 1 | -3.810727000 | -0.136348000 | -4.567084000 |
| 6                       | -2.267927000 | 1.542109000  | -0.101766000 | 1 | -3.521000000 | 1.174928000  | -3.410997000 |





|   |              |              |              |    |              |              |              |
|---|--------------|--------------|--------------|----|--------------|--------------|--------------|
| 6 | 3.509833000  | -0.127037000 | -1.291748000 | 1  | -5.246416000 | -4.100224000 | -1.097754000 |
| 6 | 2.805973000  | 0.719930000  | -2.350509000 | 1  | -4.359072000 | -2.698974000 | -2.924189000 |
| 6 | 3.782035000  | 1.388183000  | -3.322350000 | 1  | -1.696101000 | -0.096368000 | -2.409494000 |
| 6 | 1.752810000  | -0.067758000 | -3.145552000 | 1  | -3.110432000 | 0.596029000  | -4.277263000 |
| 6 | 2.004140000  | 2.151375000  | 0.692030000  | 1  | -4.201370000 | -0.769616000 | -4.031660000 |
| 6 | -2.680205000 | 1.086733000  | 0.161902000  | 1  | -4.088632000 | 0.498681000  | -2.800060000 |
| 6 | -2.347988000 | -1.651225000 | -0.401248000 | 1  | -1.183870000 | -1.045254000 | -4.646740000 |
| 6 | -2.853655000 | -2.428957000 | 0.658294000  | 1  | -0.746307000 | -2.209321000 | -3.380806000 |
| 6 | -3.904484000 | -3.306374000 | 0.378893000  | 1  | -2.228136000 | -2.437471000 | -4.315252000 |
| 6 | -4.433958000 | -3.408068000 | -0.901136000 | 1  | -1.412134000 | -1.712191000 | 2.061271000  |
| 6 | -3.931865000 | -2.617663000 | -1.928726000 | 1  | -1.582206000 | -3.499610000 | 3.715723000  |
| 6 | -2.889841000 | -1.718412000 | -1.699655000 | 1  | -1.341564000 | -4.239150000 | 2.121623000  |
| 6 | -2.373633000 | -0.846926000 | -2.834433000 | 1  | -2.942764000 | -4.239229000 | 2.874473000  |
| 6 | -3.513044000 | -0.087387000 | -3.523188000 | 1  | -2.970602000 | -1.362704000 | 3.947075000  |
| 6 | -1.585023000 | -1.682207000 | -3.851321000 | 1  | -3.549131000 | -0.524053000 | 2.491382000  |
| 6 | -2.341650000 | -2.294006000 | 2.083454000  | 1  | -4.301182000 | -2.047534000 | 2.998442000  |
| 6 | -2.032973000 | -3.648509000 | 2.729789000  | 1  | 1.932777000  | 2.963612000  | -0.035607000 |
| 6 | -3.351325000 | -1.506342000 | 2.930533000  | 13 | 0.367917000  | -1.572324000 | -0.326258000 |
| 1 | 1.756481000  | -1.445572000 | 2.143376000  | 1  | 0.864529000  | -2.635154000 | -1.500968000 |
| 1 | 2.718250000  | -0.513552000 | 4.229851000  | 7  | -0.287675000 | 1.378167000  | 0.379505000  |
| 1 | 4.275776000  | -0.283799000 | 3.412608000  | 6  | -0.600019000 | 2.786730000  | 0.576033000  |
| 1 | 2.857236000  | 0.636538000  | 2.888629000  | 6  | -0.630432000 | 3.608852000  | -0.559852000 |
| 1 | 2.576859000  | -3.027262000 | 3.749649000  | 6  | -0.878155000 | 3.243833000  | 1.869169000  |
| 1 | 4.245391000  | -2.858296000 | 3.212791000  | 6  | -0.938600000 | 4.955335000  | -0.362509000 |
| 1 | 3.056964000  | -3.640993000 | 2.158219000  | 6  | -1.177484000 | 4.601070000  | 2.011928000  |
| 1 | 5.347159000  | -2.198105000 | 1.458113000  | 6  | -1.205653000 | 5.448311000  | 0.910628000  |
| 1 | 6.481978000  | -1.664213000 | -0.661442000 | 1  | -0.976559000 | 5.625567000  | -1.216504000 |
| 1 | 5.348814000  | -0.330730000 | -2.385740000 | 1  | -1.399380000 | 4.996337000  | 2.999073000  |
| 1 | 2.278610000  | 1.531329000  | -1.831889000 | 1  | -1.443833000 | 6.498650000  | 1.043418000  |
| 1 | 4.578243000  | 1.920812000  | -2.794701000 | 6  | -0.896500000 | 2.325482000  | 3.080855000  |
| 1 | 3.243277000  | 2.108950000  | -3.943554000 | 1  | -0.615571000 | 1.315539000  | 2.756679000  |
| 1 | 4.242071000  | 0.657489000  | -3.995398000 | 6  | -0.374613000 | 3.078396000  | -1.962957000 |
| 1 | 1.369143000  | 0.544295000  | -3.969073000 | 1  | -0.053470000 | 2.031093000  | -1.889699000 |
| 1 | 2.180295000  | -0.982175000 | -3.569853000 | 6  | -2.310196000 | 2.245764000  | 3.672853000  |
| 1 | 0.881504000  | -0.346354000 | -2.539449000 | 1  | -2.333495000 | 1.534733000  | 4.504292000  |
| 1 | 3.018762000  | 1.756761000  | 0.699626000  | 1  | -2.626947000 | 3.221216000  | 4.056454000  |
| 1 | 1.766690000  | 2.580480000  | 1.668375000  | 1  | -3.035493000 | 1.921735000  | 2.921486000  |
| 1 | -2.860027000 | 2.127308000  | 0.380465000  | 6  | 0.103329000  | 2.777526000  | 4.153392000  |
| 1 | -3.533411000 | 0.450141000  | -0.032840000 | 1  | -0.161390000 | 3.764175000  | 4.546385000  |
| 1 | -4.316914000 | -3.915700000 | 1.177817000  | 1  | 0.098279000  | 2.074929000  | 4.992014000  |

|   |              |              |              |   |              |              |              |
|---|--------------|--------------|--------------|---|--------------|--------------|--------------|
| 1 | 1.127301000  | 2.837963000  | 3.770318000  | 6 | -1.527487000 | -1.643146000 | -3.878433000 |
| 6 | 0.735528000  | 3.856071000  | -2.681037000 | 6 | -2.116731000 | -2.592897000 | 2.009984000  |
| 1 | 0.940299000  | 3.400492000  | -3.655713000 | 6 | -1.739776000 | -3.969468000 | 2.566251000  |
| 1 | 0.440633000  | 4.894565000  | -2.860816000 | 6 | -3.125750000 | -1.894210000 | 2.930813000  |
| 1 | 1.670552000  | 3.871945000  | -2.109767000 | 1 | 1.916101000  | -1.285061000 | 2.135228000  |
| 6 | -1.665690000 | 3.097084000  | -2.792423000 | 1 | 2.925764000  | -0.423080000 | 4.221116000  |
| 1 | -1.483389000 | 2.669555000  | -3.784175000 | 1 | 4.467492000  | -0.166147000 | 3.383813000  |
| 1 | -2.453808000 | 2.516671000  | -2.303946000 | 1 | 3.046708000  | 0.784504000  | 2.927207000  |
| 1 | -2.025839000 | 4.122337000  | -2.928059000 | 1 | 2.819840000  | -2.936836000 | 3.620866000  |
| 6 | 1.075289000  | -3.792256000 | -0.340304000 | 1 | 4.470211000  | -2.685956000 | 3.057633000  |
| 8 | 0.704664000  | -3.143881000 | 0.651399000  | 1 | 3.286013000  | -3.455447000 | 1.992706000  |
| 8 | 1.474835000  | -4.745437000 | -0.853095000 | 1 | 5.534199000  | -1.807053000 | 1.349430000  |

**6-TSI (in benzene solvent)**

|   |              |              |              |   |              |              |              |
|---|--------------|--------------|--------------|---|--------------|--------------|--------------|
| 7 | -1.159074000 | -0.879019000 | -0.167678000 | 1 | 5.307957000  | 0.094486000  | -2.470680000 |
| 6 | -1.486851000 | 0.437637000  | 0.146481000  | 1 | 2.154301000  | 1.742532000  | -1.829041000 |
| 6 | 0.944768000  | 1.118996000  | 0.397782000  | 1 | 4.385979000  | 2.254927000  | -2.879176000 |
| 7 | 1.481682000  | -0.051836000 | 0.073456000  | 1 | 3.007868000  | 2.349890000  | -3.986792000 |
| 6 | 2.903683000  | -0.254008000 | -0.112745000 | 1 | 4.088198000  | 0.958870000  | -4.055291000 |
| 6 | 3.615824000  | -0.955486000 | 0.874913000  | 1 | 1.239554000  | 0.707423000  | -3.954253000 |
| 6 | 3.008028000  | -1.291682000 | 2.228704000  | 1 | 2.108754000  | -0.783841000 | -3.554759000 |
| 6 | 3.381247000  | -0.207384000 | 3.249250000  | 1 | 0.807393000  | -0.177096000 | -2.505740000 |
| 6 | 3.421037000  | -2.672524000 | 2.745841000  | 1 | 2.887303000  | 1.943597000  | 0.761106000  |
| 6 | 4.951906000  | -1.271801000 | 0.605919000  | 1 | 1.579014000  | 2.651917000  | 1.743965000  |
| 6 | 5.542759000  | -0.906960000 | -0.594372000 | 1 | -3.000342000 | 1.916837000  | 0.428431000  |
| 6 | 4.818512000  | -0.197101000 | -1.548440000 | 1 | -3.562290000 | 0.208604000  | -0.011350000 |
| 6 | 3.483947000  | 0.147982000  | -1.335010000 | 1 | -4.021522000 | -4.268338000 | 1.066189000  |
| 6 | 2.700262000  | 0.956855000  | -2.367937000 | 1 | -4.998760000 | -4.390289000 | -1.194711000 |
| 6 | 3.606402000  | 1.668895000  | -3.374854000 | 1 | -4.231467000 | -2.853144000 | -2.967161000 |
| 6 | 1.659850000  | 0.120317000  | -3.130109000 | 1 | -1.720930000 | -0.123690000 | -2.376871000 |
| 6 | 1.847661000  | 2.265958000  | 0.757291000  | 1 | -3.199688000 | 0.552900000  | -4.202517000 |
| 6 | -2.750540000 | 0.894645000  | 0.192856000  | 1 | -4.195055000 | -0.890992000 | -4.006727000 |
| 6 | -2.236548000 | -1.801096000 | -0.430123000 | 1 | -4.156040000 | 0.330882000  | -2.724841000 |
| 6 | -2.665807000 | -2.667851000 | 0.594171000  | 1 | -1.165515000 | -0.953111000 | -4.648540000 |
| 6 | -3.668873000 | -3.593325000 | 0.291601000  | 1 | -0.658840000 | -2.142765000 | -3.432192000 |
| 6 | -4.223893000 | -3.660995000 | -0.979544000 | 1 | -2.130196000 | -2.413060000 | -4.372942000 |
| 6 | -3.791294000 | -2.792771000 | -1.975776000 | 1 | -1.209683000 | -1.978070000 | 1.995460000  |
| 6 | -2.800798000 | -1.843435000 | -1.720977000 | 1 | -1.223783000 | -3.858849000 | 3.525446000  |
| 6 | -2.355647000 | -0.896834000 | -2.825273000 | 1 | -1.080474000 | -4.517471000 | 1.885530000  |
| 6 | -3.547881000 | -0.186507000 | -3.474136000 | 1 | -2.626186000 | -4.587201000 | 2.742836000  |
|   |              |              |              | 1 | -2.721247000 | -1.798703000 | 3.944287000  |



|    |              |              |              |   |              |              |              |
|----|--------------|--------------|--------------|---|--------------|--------------|--------------|
| 1  | -3.370905000 | -0.893996000 | 2.559409000  | 7 | -1.398283000 | -0.428619000 | -0.347602000 |
| 1  | -4.055830000 | -2.470587000 | 2.991704000  | 6 | -1.253933000 | 0.911940000  | -0.003842000 |
| 1  | 1.727425000  | 3.089748000  | 0.049121000  | 6 | 1.250281000  | 0.685742000  | 0.303757000  |
| 13 | 0.477402000  | -1.530947000 | -0.353140000 | 7 | 1.344265000  | -0.601915000 | -0.013797000 |
| 1  | 1.047593000  | -2.563924000 | -1.512314000 | 6 | 2.578450000  | -1.349609000 | 0.096556000  |
| 7  | -0.384567000 | 1.344097000  | 0.424180000  | 6 | 2.698222000  | -2.230825000 | 1.190634000  |
| 6  | -0.794233000 | 2.724892000  | 0.646200000  | 6 | 1.643714000  | -2.273344000 | 2.290924000  |
| 6  | -0.864028000 | 3.569022000  | -0.472407000 | 6 | 1.825416000  | -1.101037000 | 3.265490000  |
| 6  | -1.123981000 | 3.137223000  | 1.942656000  | 6 | 1.611564000  | -3.601567000 | 3.047194000  |
| 6  | -1.273380000 | 4.885444000  | -0.254884000 | 6 | 3.845350000  | -3.021979000 | 1.253776000  |
| 6  | -1.524671000 | 4.465876000  | 2.106683000  | 6 | 4.824737000  | -2.943649000 | 0.267959000  |
| 6  | -1.598133000 | 5.331328000  | 1.022045000  | 6 | 4.674681000  | -2.072257000 | -0.801713000 |
| 1  | -1.343633000 | 5.568615000  | -1.096758000 | 6 | 3.546179000  | -1.255424000 | -0.915945000 |
| 1  | -1.789407000 | 4.821402000  | 3.098464000  | 6 | 3.411769000  | -0.320876000 | -2.108549000 |
| 1  | -1.914869000 | 6.358904000  | 1.170501000  | 6 | 4.617939000  | 0.620074000  | -2.225255000 |
| 6  | -1.091782000 | 2.200525000  | 3.139218000  | 6 | 3.223361000  | -1.116154000 | -3.407463000 |
| 1  | -0.726229000 | 1.222257000  | 2.805226000  | 6 | 2.499502000  | 1.438046000  | 0.676066000  |
| 6  | -0.542776000 | 3.091771000  | -1.881011000 | 6 | -2.286576000 | 1.766056000  | 0.096545000  |
| 1  | -0.130209000 | 2.076294000  | -1.821978000 | 6 | -2.734565000 | -0.967957000 | -0.375309000 |
| 6  | -2.503555000 | 2.003026000  | 3.705854000  | 6 | -3.258162000 | -1.511010000 | 0.814033000  |
| 1  | -2.488028000 | 1.269542000  | 4.518435000  | 6 | -4.521091000 | -2.101645000 | 0.761307000  |
| 1  | -2.894571000 | 2.942727000  | 4.111182000  | 6 | -5.243494000 | -2.141161000 | -0.426254000 |
| 1  | -3.196018000 | 1.650014000  | 2.936055000  | 6 | -4.719572000 | -1.573234000 | -1.580991000 |
| 6  | -0.150720000 | 2.713394000  | 4.235686000  | 6 | -3.460871000 | -0.966847000 | -1.578637000 |
| 1  | -0.504841000 | 3.665477000  | 4.644388000  | 6 | -2.928922000 | -0.313021000 | -2.843356000 |
| 1  | -0.106822000 | 1.995093000  | 5.060402000  | 6 | -3.873384000 | 0.790825000  | -3.335144000 |
| 1  | 0.869301000  | 2.868733000  | 3.868834000  | 6 | -2.688523000 | -1.351181000 | -3.946237000 |
| 6  | 0.501110000  | 3.980305000  | -2.567710000 | 6 | -2.510530000 | -1.434882000 | 2.136286000  |
| 1  | 0.753579000  | 3.569940000  | -3.551436000 | 6 | -2.212839000 | -2.826951000 | 2.705632000  |
| 1  | 0.115816000  | 4.992659000  | -2.727558000 | 6 | -3.284449000 | -0.578744000 | 3.146385000  |
| 1  | 1.426027000  | 4.066344000  | -1.985986000 | 1 | 0.651294000  | -2.154381000 | 1.833388000  |
| 6  | -1.818002000 | 3.014465000  | -2.730572000 | 1 | 1.054837000  | -1.130111000 | 4.043253000  |
| 1  | -1.586977000 | 2.611118000  | -3.722867000 | 1 | 2.805594000  | -1.154401000 | 3.750544000  |
| 1  | -2.568489000 | 2.371758000  | -2.260063000 | 1 | 1.753062000  | -0.131248000 | 2.760449000  |
| 1  | -2.256334000 | 4.009528000  | -2.865794000 | 1 | 0.748393000  | -3.622494000 | 3.717864000  |
| 6  | 1.351110000  | -3.694883000 | -0.317843000 | 1 | 2.505465000  | -3.735866000 | 3.664362000  |
| 8  | 0.919824000  | -3.066294000 | 0.656616000  | 1 | 1.531248000  | -4.449775000 | 2.361006000  |
| 8  | 1.832902000  | -4.615277000 | -0.820968000 | 1 | 3.977726000  | -3.711616000 | 2.080058000  |
|    |              |              |              | 1 | 5.708981000  | -3.568947000 | 0.336188000  |
|    |              |              |              | 1 | 5.444563000  | -2.024647000 | -1.566486000 |

6-IMI (in gas phase)



|   |              |              |              |    |              |              |              |
|---|--------------|--------------|--------------|----|--------------|--------------|--------------|
| 6 | 4.653391000  | 0.544035000  | -2.127600000 | 1  | -1.922182000 | 0.095070000  | -2.643163000 |
| 6 | 3.299781000  | -1.197151000 | -3.343332000 | 1  | -3.353320000 | 1.288004000  | -4.241831000 |
| 6 | 2.508055000  | 1.402295000  | 0.719378000  | 1  | -4.787018000 | 0.424064000  | -3.670957000 |
| 6 | -2.260557000 | 1.798803000  | 0.037056000  | 1  | -3.953034000 | 1.557887000  | -2.594790000 |
| 6 | -2.743106000 | -0.936898000 | -0.386449000 | 1  | -2.285508000 | -0.939238000 | -4.867882000 |
| 6 | -3.290595000 | -1.449648000 | 0.806350000  | 1  | -2.047631000 | -2.197913000 | -3.643663000 |
| 6 | -4.565668000 | -2.014505000 | 0.752511000  | 1  | -3.673209000 | -1.843602000 | -4.247249000 |
| 6 | -5.276911000 | -2.063666000 | -0.441603000 | 1  | -1.572610000 | -0.910736000 | 1.956786000  |
| 6 | -4.727570000 | -1.533547000 | -1.602472000 | 1  | -1.768886000 | -2.662186000 | 3.689241000  |
| 6 | -3.456367000 | -0.952742000 | -1.598251000 | 1  | -1.741268000 | -3.399377000 | 2.071882000  |
| 6 | -2.902580000 | -0.337130000 | -2.873099000 | 1  | -3.263374000 | -3.259562000 | 2.962478000  |
| 6 | -3.802865000 | 0.800289000  | -3.370357000 | 1  | -2.736666000 | -0.346151000 | 4.043584000  |
| 6 | -2.714733000 | -1.392418000 | -3.968245000 | 1  | -3.459605000 | 0.537217000  | 2.681128000  |
| 6 | -2.553859000 | -1.367848000 | 2.134726000  | 1  | -4.284555000 | -0.874579000 | 3.367748000  |
| 6 | -2.316554000 | -2.753510000 | 2.744471000  | 1  | 2.848420000  | 2.005175000  | -0.130964000 |
| 6 | -3.304295000 | -0.456912000 | 3.112904000  | 13 | -0.094305000 | -1.579654000 | -0.608135000 |
| 1 | 0.586828000  | -2.156675000 | 1.872729000  | 1  | 0.104256000  | -4.652032000 | -1.802755000 |
| 1 | 0.977549000  | -1.092790000 | 4.065651000  | 7  | 0.110426000  | 1.376505000  | 0.261773000  |
| 1 | 2.731693000  | -1.155976000 | 3.802642000  | 6  | 0.238095000  | 2.819332000  | 0.415541000  |
| 1 | 1.717626000  | -0.130604000 | 2.777890000  | 6  | 0.532794000  | 3.565831000  | -0.733011000 |
| 1 | 0.655739000  | -3.588099000 | 3.795995000  | 6  | 0.045929000  | 3.392390000  | 1.679689000  |
| 1 | 2.411069000  | -3.724698000 | 3.747961000  | 6  | 0.670366000  | 4.947047000  | -0.581134000 |
| 1 | 1.428690000  | -4.453564000 | 2.458825000  | 6  | 0.197943000  | 4.777365000  | 1.778717000  |
| 1 | 3.863088000  | -3.791734000 | 2.155179000  | 6  | 0.511877000  | 5.546350000  | 0.663293000  |
| 1 | 5.624663000  | -3.691089000 | 0.438602000  | 1  | 0.897075000  | 5.559408000  | -1.449393000 |
| 1 | 5.428710000  | -2.137188000 | -1.466697000 | 1  | 0.063378000  | 5.259365000  | 2.743230000  |
| 1 | 2.544983000  | 0.227364000  | -1.939874000 | 1  | 0.624612000  | 6.621337000  | 0.763449000  |
| 1 | 4.781632000  | 1.128056000  | -1.210461000 | 6  | -0.329808000 | 2.577331000  | 2.908009000  |
| 1 | 4.538684000  | 1.238941000  | -2.965452000 | 1  | -0.419090000 | 1.524680000  | 2.612967000  |
| 1 | 5.576861000  | -0.020278000 | -2.293572000 | 6  | 0.660858000  | 2.929711000  | -2.108428000 |
| 1 | 3.178304000  | -0.521035000 | -4.195883000 | 1  | 0.600869000  | 1.839802000  | -1.998244000 |
| 1 | 4.192194000  | -1.806154000 | -3.523352000 | 6  | -1.691004000 | 3.021906000  | 3.458249000  |
| 1 | 2.434978000  | -1.866982000 | -3.310183000 | 1  | -1.980929000 | 2.393929000  | 4.306729000  |
| 1 | 3.293732000  | 0.696993000  | 0.984887000  | 1  | -1.650734000 | 4.058186000  | 3.810924000  |
| 1 | 2.327751000  | 2.082883000  | 1.550514000  | 1  | -2.472709000 | 2.952531000  | 2.696202000  |
| 1 | -2.133360000 | 2.839442000  | 0.290044000  | 6  | 0.738035000  | 2.678916000  | 4.004750000  |
| 1 | -3.262063000 | 1.445312000  | -0.170644000 | 1  | 0.822772000  | 3.706888000  | 4.373205000  |
| 1 | -5.009124000 | -2.416524000 | 1.659803000  | 1  | 0.468437000  | 2.042419000  | 4.853847000  |
| 1 | -6.266649000 | -2.509252000 | -0.464236000 | 1  | 1.728527000  | 2.369582000  | 3.654617000  |
| 1 | -5.295238000 | -1.562308000 | -2.528942000 | 6  | 2.004649000  | 3.255157000  | -2.769428000 |

|                             |              |              |              |   |              |              |              |
|-----------------------------|--------------|--------------|--------------|---|--------------|--------------|--------------|
| 1                           | 2.102823000  | 2.707820000  | -3.713169000 | 1 | 0.705932000  | -3.913982000 | 3.313439000  |
| 1                           | 2.086532000  | 4.323041000  | -2.997254000 | 6 | 1.860655000  | -1.405171000 | 3.112608000  |
| 1                           | 2.852990000  | 2.988060000  | -2.129083000 | 1 | 2.405903000  | -0.599013000 | 2.609703000  |
| 6                           | -0.507956000 | 3.360623000  | -3.003755000 | 1 | 2.593985000  | -2.148338000 | 3.444280000  |
| 1                           | -0.450335000 | 2.858888000  | -3.975475000 | 1 | 1.386806000  | -0.985047000 | 4.006272000  |
| 1                           | -1.468689000 | 3.111406000  | -2.541693000 | 6 | -0.625579000 | 2.784404000  | 0.472966000  |
| 1                           | -0.484562000 | 4.441581000  | -3.180499000 | 6 | -1.017316000 | 3.779882000  | -0.443391000 |
| 6                           | 0.035195000  | -3.635273000 | -1.411399000 | 6 | -0.661677000 | 5.101964000  | -0.166938000 |
| 8                           | -0.243309000 | -3.402534000 | -0.190297000 | 1 | -0.946484000 | 5.886009000  | -0.863278000 |
| 8                           | 0.230593000  | -2.613914000 | -2.146431000 | 6 | 0.045640000  | 5.431031000  | 0.981024000  |
| <b>6-TS2 (in gas phase)</b> |              |              |              | 1 | 0.314717000  | 6.464189000  | 1.176007000  |
| 13                          | 0.514164000  | 0.558132000  | -0.585856000 | 6 | 0.402656000  | 4.438961000  | 1.885662000  |
| 7                           | -0.064340000 | -1.182478000 | -0.432967000 | 1 | 0.945481000  | 4.711560000  | 2.784450000  |
| 7                           | -2.280625000 | -0.558750000 | 0.092406000  | 6 | 0.077228000  | 3.101016000  | 1.656227000  |
| 7                           | -0.862969000 | 1.394759000  | 0.166604000  | 6 | -1.832172000 | 3.478973000  | -1.692948000 |
| 6                           | 0.948701000  | -2.213827000 | -0.355532000 | 1 | -2.068461000 | 2.408892000  | -1.703516000 |
| 6                           | 1.504961000  | -2.726872000 | -1.536174000 | 6 | -1.052674000 | 3.805616000  | -2.972342000 |
| 6                           | 2.502063000  | -3.695616000 | -1.410206000 | 1 | -0.138480000 | 3.210358000  | -3.045335000 |
| 1                           | 2.943757000  | -4.123814000 | -2.305901000 | 1 | -0.776221000 | 4.864544000  | -3.006546000 |
| 6                           | 2.936643000  | -4.121430000 | -0.160452000 | 1 | -1.664493000 | 3.591653000  | -3.854745000 |
| 1                           | 3.707297000  | -4.882462000 | -0.085004000 | 6 | -3.158301000 | 4.251198000  | -1.673170000 |
| 6                           | 2.389317000  | -3.572004000 | 0.993735000  | 1 | -3.746357000 | 4.010586000  | -0.782359000 |
| 1                           | 2.738965000  | -3.908279000 | 1.966429000  | 1 | -3.755884000 | 4.004143000  | -2.556062000 |
| 6                           | 1.387434000  | -2.601282000 | 0.924145000  | 1 | -2.985698000 | 5.332128000  | -1.682665000 |
| 6                           | 1.055550000  | -2.274915000 | -2.915182000 | 6 | 0.416222000  | 2.046672000  | 2.701798000  |
| 1                           | 0.313492000  | -1.476552000 | -2.795058000 | 1 | 0.491480000  | 1.073426000  | 2.201517000  |
| 6                           | 0.379534000  | -3.421141000 | -3.678607000 | 6 | -0.729221000 | 1.924343000  | 3.717336000  |
| 1                           | -0.479610000 | -3.820251000 | -3.129566000 | 1 | -0.509729000 | 1.138536000  | 4.449101000  |
| 1                           | 1.080655000  | -4.245213000 | -3.846418000 | 1 | -1.673625000 | 1.683187000  | 3.220059000  |
| 1                           | 0.030122000  | -3.073683000 | -4.655483000 | 1 | -0.859129000 | 2.867090000  | 4.259826000  |
| 6                           | 2.230960000  | -1.698499000 | -3.713825000 | 6 | 1.748415000  | 2.304209000  | 3.410535000  |
| 1                           | 2.726760000  | -0.901619000 | -3.152158000 | 1 | 2.569690000  | 2.437898000  | 2.699589000  |
| 1                           | 1.877921000  | -1.293836000 | -4.667087000 | 1 | 1.993025000  | 1.456898000  | 4.058467000  |
| 1                           | 2.971562000  | -2.474780000 | -3.935299000 | 1 | 1.697194000  | 3.189972000  | 4.051307000  |
| 6                           | 0.794788000  | -2.038041000 | 2.209802000  | 1 | 2.342528000  | 2.636085000  | -2.926705000 |
| 1                           | 0.079763000  | -1.245042000 | 1.956165000  | 6 | 2.131890000  | 2.104211000  | -1.991942000 |
| 6                           | 0.027376000  | -3.123370000 | 2.976568000  | 8 | 1.195683000  | 1.191547000  | -2.086128000 |
| 1                           | -0.744134000 | -3.590937000 | 2.356268000  | 8 | 2.732269000  | 2.349741000  | -0.955517000 |
| 1                           | -0.455423000 | -2.693953000 | 3.860754000  | 6 | -2.117123000 | 0.853646000  | 0.404539000  |
|                             |              |              |              | 6 | -3.169277000 | 1.557810000  | 0.856771000  |



|   |              |              |              |   |              |              |              |
|---|--------------|--------------|--------------|---|--------------|--------------|--------------|
| 1 | -2.688800000 | -1.097406000 | 3.151437000  | 1 | -2.025086000 | 1.546301000  | -4.045663000 |
| 1 | -1.802230000 | -1.524088000 | 4.633337000  | 1 | -1.638439000 | 3.262336000  | -4.060689000 |
| 1 | -2.888994000 | -2.700691000 | 3.884483000  | 1 | -2.411695000 | 2.310598000  | 3.119826000  |
| 6 | -0.791511000 | -1.946442000 | -2.272610000 | 6 | -2.148568000 | 1.882557000  | 2.145896000  |
| 1 | -0.105614000 | -1.139463000 | -1.986243000 | 8 | -1.188535000 | 0.995119000  | 2.175443000  |
| 6 | 0.014813000  | -2.972899000 | -3.077834000 | 8 | -2.721990000 | 2.215234000  | 1.114331000  |
| 1 | 0.803784000  | -3.434385000 | -2.475219000 | 6 | 2.106865000  | 0.890052000  | -0.354367000 |
| 1 | 0.479898000  | -2.494536000 | -3.946557000 | 6 | 3.152587000  | 1.632787000  | -0.757459000 |
| 1 | -0.634923000 | -3.775465000 | -3.444068000 | 6 | 1.379063000  | -1.483966000 | 0.152505000  |
| 6 | -1.877838000 | -1.315644000 | -3.149710000 | 1 | 4.139875000  | 1.227826000  | -0.912617000 |
| 1 | -2.446089000 | -0.547765000 | -2.612622000 | 1 | 2.996799000  | 2.685535000  | -0.954360000 |
| 1 | -2.587686000 | -2.066942000 | -3.513601000 | 6 | 1.856889000  | -2.909237000 | 0.200760000  |
| 1 | -1.419312000 | -0.845187000 | -4.026536000 | 1 | 2.364927000  | -3.185693000 | -0.725636000 |
| 6 | 0.580381000  | 2.791871000  | -0.410268000 | 1 | 1.023453000  | -3.586126000 | 0.376065000  |
| 6 | 0.961667000  | 3.775509000  | 0.523583000  | 1 | 2.585239000  | -3.016316000 | 1.011195000  |
| 6 | 0.614435000  | 5.103234000  | 0.260623000  | 1 | -1.858541000 | 0.526539000  | -0.508569000 |
| 1 | 0.893333000  | 5.876717000  | 0.971402000  | 5 | -3.050885000 | 0.571969000  | -0.132553000 |
| 6 | -0.082745000 | 5.448586000  | -0.888471000 | 8 | -3.947442000 | 1.030278000  | -1.032630000 |
| 1 | -0.347499000 | 6.485173000  | -1.072942000 | 8 | -3.502080000 | -0.328012000 | 0.781855000  |
| 6 | -0.441442000 | 4.467702000  | -1.805258000 | 6 | -5.180174000 | 0.284829000  | -0.763580000 |
| 1 | -0.984212000 | 4.752270000  | -2.700478000 | 6 | -4.962955000 | -0.235020000 | 0.702480000  |
| 6 | -0.119385000 | 3.126081000  | -1.591596000 | 6 | -5.425748000 | 0.753643000  | 1.768017000  |
| 6 | 1.745232000  | 3.453908000  | 1.788063000  | 6 | -5.534096000 | -1.613397000 | 0.978157000  |
| 1 | 1.976455000  | 2.382774000  | 1.788892000  | 6 | -6.354536000 | 1.229956000  | -0.934312000 |
| 6 | 0.931655000  | 3.766313000  | 3.049073000  | 6 | -5.239831000 | -0.843177000 | -1.786003000 |
| 1 | -0.005956000 | 3.203359000  | 3.073770000  | 1 | -5.165585000 | -0.418965000 | -2.791519000 |
| 1 | 0.685969000  | 4.832137000  | 3.107184000  | 1 | -4.415073000 | -1.549654000 | -1.644639000 |
| 1 | 1.503937000  | 3.505536000  | 3.945892000  | 1 | -6.184609000 | -1.389734000 | -1.710631000 |
| 6 | 3.074056000  | 4.219102000  | 1.819836000  | 1 | -6.425500000 | 1.537703000  | -1.981230000 |
| 1 | 3.688687000  | 3.990641000  | 0.943639000  | 1 | -6.243006000 | 2.126223000  | -0.321444000 |
| 1 | 3.644567000  | 3.955387000  | 2.716284000  | 1 | -7.289106000 | 0.728351000  | -0.662693000 |
| 1 | 2.906549000  | 5.301202000  | 1.842196000  | 1 | -5.062877000 | 1.765747000  | 1.575408000  |
| 6 | -0.471716000 | 2.079449000  | -2.641236000 | 1 | -5.048491000 | 0.426916000  | 2.742895000  |
| 1 | -0.621279000 | 1.118959000  | -2.134569000 | 1 | -6.518159000 | 0.777522000  | 1.819309000  |
| 6 | 0.701720000  | 1.882549000  | -3.610735000 | 1 | -6.620687000 | -1.607009000 | 0.842959000  |
| 1 | 0.476165000  | 1.087996000  | -4.332043000 | 1 | -5.321885000 | -1.895971000 | 2.013883000  |
| 1 | 1.619478000  | 1.615290000  | -3.077152000 | 1 | -5.097422000 | -2.367620000 | 0.321353000  |
| 1 | 0.893240000  | 2.804507000  | -4.171515000 | 6 | 3.691319000  | -0.953876000 | -0.102005000 |
| 6 | -1.759278000 | 2.393656000  | -3.405410000 | 6 | 4.275543000  | -1.416737000 | -1.289090000 |
| 1 | -2.598595000 | 2.581663000  | -2.728630000 | 6 | 4.392479000  | -0.840824000 | 1.106076000  |

|                             |              |              |              |   |              |              |              |
|-----------------------------|--------------|--------------|--------------|---|--------------|--------------|--------------|
| 6                           | 5.622228000  | -1.784631000 | -1.232237000 | 6 | -0.246949000 | 3.364268000  | 1.189373000  |
| 6                           | 5.732218000  | -1.232779000 | 1.111743000  | 6 | 0.557752000  | 2.790394000  | 2.357834000  |
| 6                           | 6.342347000  | -1.700136000 | -0.046205000 | 6 | 0.845765000  | 3.826983000  | 3.447062000  |
| 1                           | 6.115370000  | -2.137428000 | -2.133268000 | 6 | -0.033440000 | 1.530675000  | 2.996950000  |
| 1                           | 6.304125000  | -1.160283000 | 2.032631000  | 6 | 2.518928000  | 2.334735000  | -0.380383000 |
| 1                           | 7.387229000  | -1.993575000 | -0.026753000 | 6 | 2.264585000  | -2.386871000 | 0.523481000  |
| 6                           | 3.756400000  | -0.287427000 | 2.371478000  | 6 | -0.522986000 | -2.653797000 | 0.456150000  |
| 1                           | 2.716182000  | -0.017219000 | 2.151834000  | 6 | -0.534353000 | -3.604738000 | -0.584201000 |
| 6                           | 3.524108000  | -1.504929000 | -2.609567000 | 6 | -1.197801000 | -4.815728000 | -0.370465000 |
| 1                           | 2.461712000  | -1.299088000 | -2.421671000 | 6 | -1.829877000 | -5.089541000 | 0.832029000  |
| 6                           | 4.471944000  | 0.991528000  | 2.819458000  | 6 | -1.798405000 | -4.150164000 | 1.854998000  |
| 1                           | 4.488881000  | 1.731962000  | 2.013654000  | 6 | -1.147346000 | -2.925907000 | 1.693989000  |
| 1                           | 3.961354000  | 1.428725000  | 3.684513000  | 6 | -1.099587000 | -1.928216000 | 2.842033000  |
| 1                           | 5.505894000  | 0.781244000  | 3.113761000  | 6 | 0.299952000  | -1.880442000 | 3.471544000  |
| 6                           | 3.741582000  | -1.328252000 | 3.496115000  | 6 | -2.130646000 | -2.185504000 | 3.943813000  |
| 1                           | 4.759434000  | -1.614279000 | 3.781738000  | 6 | 0.131914000  | -3.387914000 | -1.935198000 |
| 1                           | 3.247663000  | -0.920492000 | 4.383970000  | 6 | -0.892471000 | -3.447776000 | -3.078695000 |
| 1                           | 3.208647000  | -2.238892000 | 3.200226000  | 6 | 1.224491000  | -4.437941000 | -2.182187000 |
| 6                           | 3.637092000  | -2.901781000 | -3.234084000 | 1 | -0.029397000 | 1.919060000  | -2.579459000 |
| 1                           | 3.029123000  | -2.960283000 | -4.142298000 | 1 | 0.679864000  | 3.441599000  | -4.380239000 |
| 1                           | 4.670755000  | -3.123902000 | -3.518612000 | 1 | 0.040667000  | 4.835158000  | -3.495558000 |
| 1                           | 3.307234000  | -3.694441000 | -2.553940000 | 1 | 1.415559000  | 3.934578000  | -2.843812000 |
| 6                           | 4.039174000  | -0.450786000 | -3.599156000 | 1 | -1.614938000 | 2.330767000  | -4.414251000 |
| 1                           | 5.088860000  | -0.640484000 | -3.849787000 | 1 | -2.278203000 | 3.739826000  | -3.592373000 |
| 1                           | 3.460222000  | -0.485878000 | -4.528002000 | 1 | -2.544269000 | 2.141619000  | -2.905145000 |
| 1                           | 3.964521000  | 0.559325000  | -3.187454000 | 1 | -1.762465000 | 5.177282000  | -1.911161000 |
|                             |              |              |              | 1 | -2.010172000 | 6.157058000  | 0.341908000  |
|                             |              |              |              | 1 | -0.947140000 | 5.078075000  | 2.277449000  |
|                             |              |              |              | 1 | 1.536007000  | 2.500942000  | 1.950247000  |
|                             |              |              |              | 1 | 1.279034000  | 4.743318000  | 3.036374000  |
|                             |              |              |              | 1 | 1.554401000  | 3.408658000  | 4.167099000  |
|                             |              |              |              | 1 | -0.061735000 | 4.090441000  | 4.000240000  |
|                             |              |              |              | 1 | 0.645712000  | 1.166738000  | 3.776023000  |
|                             |              |              |              | 1 | -0.999904000 | 1.739842000  | 3.467218000  |
|                             |              |              |              | 1 | -0.161489000 | 0.721064000  | 2.271964000  |
|                             |              |              |              | 1 | 1.976709000  | 3.277610000  | -0.391594000 |
|                             |              |              |              | 1 | 3.009756000  | 2.194914000  | -1.349445000 |
|                             |              |              |              | 1 | 3.341641000  | -2.344135000 | 0.529448000  |
|                             |              |              |              | 1 | 1.792516000  | -3.333299000 | 0.748535000  |
|                             |              |              |              | 1 | -1.223681000 | -5.553655000 | -1.167511000 |
| <b>6-IM2 (in gas phase)</b> |              |              |              |   |              |              |              |
| 7                           | 0.090737000  | -1.356060000 | 0.250254000  |   |              |              |              |
| 6                           | 1.483284000  | -1.320661000 | 0.269917000  |   |              |              |              |
| 6                           | 1.571846000  | 1.179939000  | -0.160150000 |   |              |              |              |
| 7                           | 0.259046000  | 1.400355000  | -0.207790000 |   |              |              |              |
| 6                           | -0.248991000 | 2.753354000  | -0.088644000 |   |              |              |              |
| 6                           | -0.734216000 | 3.415443000  | -1.225855000 |   |              |              |              |
| 6                           | -0.503574000 | 2.902989000  | -2.638252000 |   |              |              |              |
| 6                           | 0.467410000  | 3.833657000  | -3.380810000 |   |              |              |              |
| 6                           | -1.809873000 | 2.764136000  | -3.427261000 |   |              |              |              |
| 6                           | -1.371215000 | 4.649571000  | -1.045874000 |   |              |              |              |
| 6                           | -1.498468000 | 5.208742000  | 0.214407000  |   |              |              |              |
| 6                           | -0.909875000 | 4.584908000  | 1.312915000  |   |              |              |              |





|   |              |              |              |    |              |              |              |
|---|--------------|--------------|--------------|----|--------------|--------------|--------------|
| 6 | -0.254095000 | 2.759861000  | -0.114023000 | 1  | 0.619510000  | 1.191389000  | 3.756315000  |
| 6 | -0.748453000 | 3.409018000  | -1.254840000 | 1  | -1.018293000 | 1.784945000  | 3.449930000  |
| 6 | -0.530186000 | 2.881600000  | -2.663599000 | 1  | -0.197416000 | 0.753306000  | 2.253327000  |
| 6 | 0.434140000  | 3.802258000  | -3.424742000 | 1  | 1.975450000  | 3.289237000  | -0.413355000 |
| 6 | -1.842512000 | 2.734098000  | -3.439048000 | 1  | 3.018062000  | 2.204250000  | -1.354401000 |
| 6 | -1.388300000 | 4.643168000  | -1.083702000 | 1  | 3.346416000  | -2.330973000 | 0.530952000  |
| 6 | -1.506563000 | 5.215963000  | 0.171433000  | 1  | 1.801436000  | -3.320932000 | 0.751528000  |
| 6 | -0.911462000 | 4.604112000  | 1.273479000  | 1  | -1.218394000 | -5.546549000 | -1.168757000 |
| 6 | -0.249628000 | 3.381719000  | 1.159144000  | 1  | -2.331440000 | -6.032658000 | 0.980143000  |
| 6 | 0.551291000  | 2.810527000  | 2.331596000  | 1  | -2.267783000 | -4.380880000 | 2.802611000  |
| 6 | 0.849431000  | 3.849178000  | 3.414885000  | 1  | -1.328739000 | -0.942739000 | 2.426575000  |
| 6 | -0.055921000 | 1.562055000  | 2.977154000  | 1  | 0.313203000  | -1.167832000 | 4.326512000  |
| 6 | 2.516586000  | 2.346106000  | -0.391130000 | 1  | 0.638043000  | -2.829989000 | 3.806468000  |
| 6 | 2.269331000  | -2.373454000 | 0.522100000  | 1  | 1.055167000  | -1.479992000 | 2.743258000  |
| 6 | -0.512392000 | -2.648668000 | 0.460141000  | 1  | -2.123887000 | -1.361942000 | 4.656612000  |
| 6 | -0.526332000 | -3.599642000 | -0.580969000 | 1  | -3.113257000 | -2.369044000 | 3.585008000  |
| 6 | -1.188991000 | -4.811591000 | -0.368624000 | 1  | -1.812469000 | -3.092752000 | 4.543344000  |
| 6 | -1.815713000 | -5.088226000 | 0.836299000  | 1  | 0.601700000  | -2.388595000 | -1.941729000 |
| 6 | -1.777517000 | -4.152441000 | 1.862534000  | 1  | -0.453878000 | -3.060440000 | -4.005458000 |
| 6 | -1.130045000 | -2.925457000 | 1.700964000  | 1  | -1.800820000 | -2.882012000 | -2.849002000 |
| 6 | -1.088848000 | -1.926140000 | 2.849045000  | 1  | -1.200584000 | -4.478133000 | -3.263315000 |
| 6 | 0.315834000  | -1.840476000 | 3.461443000  | 1  | 1.708143000  | -4.263959000 | -3.152323000 |
| 6 | -2.099165000 | -2.209007000 | 3.962671000  | 1  | 2.003221000  | -4.392509000 | -1.407095000 |
| 6 | 0.135279000  | -3.379997000 | -1.933834000 | 1  | 0.804858000  | -5.435818000 | -2.187738000 |
| 6 | -0.890055000 | -3.444376000 | -3.076049000 | 1  | 3.296820000  | 2.386706000  | 0.369376000  |
| 6 | 1.230297000  | -4.426696000 | -2.180589000 | 13 | -0.903474000 | -0.042434000 | -0.500007000 |
| 1 | -0.055090000 | 1.899035000  | -2.598783000 | 1  | -1.893487000 | -0.318151000 | -4.137101000 |
| 1 | 0.642593000  | 3.394355000  | -4.419234000 | 7  | 2.123605000  | -0.025888000 | -0.003956000 |
| 1 | 0.005822000  | 4.801712000  | -3.554513000 | 6  | 3.580195000  | -0.074889000 | -0.020076000 |
| 1 | 1.385737000  | 3.912920000  | -2.894886000 | 6  | 4.262226000  | 0.068651000  | 1.197417000  |
| 1 | -1.657871000 | 2.285404000  | -4.421382000 | 6  | 4.228979000  | -0.279489000 | -1.243490000 |
| 1 | -2.310562000 | 3.709119000  | -3.612927000 | 6  | 5.656127000  | 0.007205000  | 1.159648000  |
| 1 | -2.575560000 | 2.121051000  | -2.903673000 | 6  | 5.624939000  | -0.336538000 | -1.226528000 |
| 1 | -1.787374000 | 5.158353000  | -1.953075000 | 6  | 6.332282000  | -0.194355000 | -0.038961000 |
| 1 | -2.019287000 | 6.164905000  | 0.292651000  | 1  | 6.217189000  | 0.111107000  | 2.084344000  |
| 1 | -0.946601000 | 5.107529000  | 2.233077000  | 1  | 6.161653000  | -0.501847000 | -2.156380000 |
| 1 | 1.526256000  | 2.506060000  | 1.927398000  | 1  | 7.416649000  | -0.244046000 | -0.046058000 |
| 1 | 1.300477000  | 4.756496000  | 3.002153000  | 6  | 3.475260000  | -0.475277000 | -2.548592000 |
| 1 | 1.548800000  | 3.424412000  | 4.141020000  | 1  | 2.407999000  | -0.300371000 | -2.363182000 |
| 1 | -0.054603000 | 4.132029000  | 3.964700000  | 6  | 3.545780000  | 0.263136000  | 2.525150000  |



|    |              |              |              |   |              |              |              |
|----|--------------|--------------|--------------|---|--------------|--------------|--------------|
| 1  | 2.963387000  | -0.738359000 | -3.015871000 | 6 | -5.704490000 | -1.450042000 | -0.841132000 |
| 1  | 2.807142000  | -3.975193000 | -2.750601000 | 6 | -6.180274000 | -1.928342000 | 0.374490000  |
| 1  | 3.359892000  | -5.291071000 | -0.736366000 | 1 | -5.746272000 | -2.295434000 | 2.443192000  |
| 1  | 2.343552000  | -4.723434000 | 1.432502000  | 1 | -6.360785000 | -1.435696000 | -1.706377000 |
| 1  | -0.436774000 | -2.383890000 | 1.845976000  | 1 | -7.200619000 | -2.289805000 | 0.451080000  |
| 1  | 0.055406000  | -4.748624000 | 2.541798000  | 6 | -3.902881000 | -0.424102000 | -2.291017000 |
| 1  | -0.032441000 | -3.595466000 | 3.885342000  | 1 | -2.823418000 | -0.241576000 | -2.212922000 |
| 1  | 1.535595000  | -4.174185000 | 3.333524000  | 6 | -3.182948000 | -1.442143000 | 2.682353000  |
| 1  | 0.786080000  | -1.169806000 | 3.572671000  | 1 | -2.204842000 | -1.013681000 | 2.428731000  |
| 1  | 2.332443000  | -1.820491000 | 2.990713000  | 6 | -4.576706000 | 0.924501000  | -2.575945000 |
| 1  | 1.432212000  | -0.665798000 | 2.000026000  | 1 | -4.169553000 | 1.368697000  | -3.490693000 |
| 1  | -0.963395000 | -3.480935000 | -0.850049000 | 1 | -5.655807000 | 0.795944000  | -2.712908000 |
| 1  | -2.546079000 | -2.801251000 | -1.293957000 | 1 | -4.416349000 | 1.621104000  | -1.748011000 |
| 1  | -4.088966000 | 1.128411000  | 1.056557000  | 6 | -4.128697000 | -1.400208000 | -3.451650000 |
| 1  | -2.989381000 | 2.619817000  | 1.104181000  | 1 | -5.195608000 | -1.563979000 | -3.631501000 |
| 1  | -1.017330000 | 5.914955000  | -0.980736000 | 1 | -3.699441000 | -0.993042000 | -4.371899000 |
| 1  | 0.093731000  | 6.556316000  | 1.126395000  | 1 | -3.668992000 | -2.376582000 | -3.265623000 |
| 1  | 0.664428000  | 4.835095000  | 2.801870000  | 6 | -2.963126000 | -2.850253000 | 3.250555000  |
| 1  | 0.082138000  | 1.167582000  | 2.284486000  | 1 | -2.338374000 | -2.799281000 | 4.148044000  |
| 1  | -0.528277000 | 1.551922000  | 4.638689000  | 1 | -3.914762000 | -3.309802000 | 3.536216000  |
| 1  | -0.614788000 | 3.298159000  | 4.354375000  | 1 | -2.472475000 | -3.520413000 | 2.536102000  |
| 1  | -1.762056000 | 2.214034000  | 3.544484000  | 6 | -3.808066000 | -0.537529000 | 3.753337000  |
| 1  | 1.923059000  | 1.416017000  | 3.861899000  | 1 | -3.150767000 | -0.480376000 | 4.626491000  |
| 1  | 2.409942000  | 2.206408000  | 2.345904000  | 1 | -3.962784000 | 0.475999000  | 3.374642000  |
| 1  | 1.887673000  | 3.175572000  | 3.729651000  | 1 | -4.773402000 | -0.932013000 | 4.086783000  |
| 1  | -1.940957000 | 2.381724000  | -1.848649000 | 6 | 2.085474000  | 1.849507000  | -2.369226000 |
| 1  | -1.565826000 | 3.592675000  | -3.979486000 | 8 | 1.088577000  | 1.124768000  | -2.117829000 |
| 1  | -0.034330000 | 3.374590000  | -3.118718000 | 8 | 3.072439000  | 2.021688000  | -1.597835000 |
| 1  | -0.837863000 | 4.950464000  | -3.110448000 | 5 | 3.342522000  | 1.161381000  | -0.393584000 |
| 1  | -3.732022000 | 3.859596000  | -2.715429000 | 1 | 1.992686000  | 1.181498000  | 0.304387000  |
| 1  | -3.747168000 | 3.859909000  | -0.941178000 | 8 | 3.531257000  | -0.193769000 | -0.643196000 |
| 1  | -3.065569000 | 5.234479000  | -1.825510000 | 8 | 4.266896000  | 1.719177000  | 0.442054000  |
| 1  | -2.238776000 | -3.262962000 | 0.370636000  | 6 | 5.099325000  | 0.633027000  | 0.921677000  |
| 13 | 0.646256000  | 0.585195000  | -0.409674000 | 6 | 4.882020000  | -0.474993000 | -0.170345000 |
| 1  | 2.113016000  | 2.388386000  | -3.318071000 | 6 | 4.922748000  | -1.895845000 | 0.357127000  |
| 7  | -2.221186000 | -0.528348000 | 0.074998000  | 6 | 5.808566000  | -0.315680000 | -1.372799000 |
| 6  | -3.590035000 | -1.016859000 | 0.180064000  | 6 | 4.585113000  | 0.233168000  | 2.298687000  |
| 6  | -4.042019000 | -1.471445000 | 1.426262000  | 6 | 6.529298000  | 1.140412000  | 1.019595000  |
| 6  | -4.396020000 | -0.980179000 | -0.964997000 | 1 | 5.894219000  | -2.103496000 | 0.818150000  |
| 6  | -5.357877000 | -1.934637000 | 1.494999000  | 1 | 4.133389000  | -2.066692000 | 1.093492000  |

|   |             |              |              |   |              |              |              |
|---|-------------|--------------|--------------|---|--------------|--------------|--------------|
| 1 | 4.773230000 | -2.597904000 | -0.467039000 | 6 | -0.872902000 | 3.851072000  | -3.120786000 |
| 1 | 5.777716000 | 0.706450000  | -1.764279000 | 6 | -3.102292000 | 4.083307000  | -1.991610000 |
| 1 | 6.843398000 | -0.557318000 | -1.115081000 | 1 | 0.460170000  | -1.173011000 | -2.755615000 |
| 1 | 5.190474000 | -0.566768000 | 2.734827000  | 1 | 0.117733000  | -2.460122000 | -4.824242000 |
| 1 | 4.629025000 | 1.103112000  | 2.959455000  | 1 | 1.032843000  | -3.823129000 | -4.161556000 |
| 1 | 7.205114000 | 0.323590000  | 1.293773000  | 1 | -0.509368000 | -3.355489000 | -3.428944000 |
| 1 | 6.865232000 | 1.577320000  | 0.077895000  | 1 | 2.089772000  | -0.798097000 | -4.509644000 |
| 1 | 6.590090000 | 1.909167000  | 1.793941000  | 1 | 3.021067000  | -2.225736000 | -4.050613000 |
| 1 | 5.480704000 | -0.998824000 | -2.161600000 | 1 | 2.991665000  | -0.833366000 | -2.966487000 |
| 1 | 3.546080000 | -0.100492000 | 2.244103000  | 1 | 2.826927000  | -4.067388000 | -2.624838000 |

**6-TS3** (in benzene solvent)

|   |              |              |              |   |              |              |              |
|---|--------------|--------------|--------------|---|--------------|--------------|--------------|
| 7 | -0.837770000 | 1.439656000  | 0.073918000  | 1 | 2.354959000  | -4.661121000 | 1.582817000  |
| 6 | -2.075815000 | 0.886323000  | 0.346355000  | 1 | -0.424620000 | -2.304963000 | 1.910541000  |
| 6 | -1.278398000 | -1.450107000 | -0.225924000 | 1 | 0.059645000  | -4.639152000 | 2.707114000  |
| 7 | 0.028233000  | -1.189052000 | -0.343425000 | 1 | -0.008650000 | -3.426913000 | 3.998425000  |
| 6 | 0.953573000  | -2.310251000 | -0.420453000 | 1 | 1.550270000  | -4.041001000 | 3.459466000  |
| 6 | 1.505952000  | -2.677140000 | -1.655170000 | 1 | 0.817183000  | -1.026183000 | 3.576237000  |
| 6 | 1.143220000  | -1.999850000 | -2.965849000 | 1 | 2.356077000  | -1.710486000 | 3.016411000  |
| 6 | 0.402013000  | -2.968029000 | -3.896797000 | 1 | 1.462897000  | -0.590726000 | 1.980715000  |
| 6 | 2.383760000  | -1.424491000 | -3.659858000 | 1 | -0.958660000 | -3.517745000 | -0.742813000 |
| 6 | 2.390338000  | -3.761738000 | -1.677999000 | 1 | -2.528944000 | -2.853058000 | -1.239773000 |
| 6 | 2.696092000  | -4.463383000 | -0.522852000 | 1 | -4.097321000 | 1.143873000  | 0.992434000  |
| 6 | 2.120583000  | -4.092197000 | 0.689695000  | 1 | -3.006085000 | 2.637933000  | 1.020550000  |
| 6 | 1.240777000  | -3.014451000 | 0.769199000  | 1 | -1.052045000 | 5.905210000  | -1.052905000 |
| 6 | 0.611832000  | -2.613282000 | 2.096931000  | 1 | -0.042901000 | 6.590339000  | 1.094415000  |
| 6 | 0.551778000  | -3.751176000 | 3.116611000  | 1 | 0.512215000  | 4.891609000  | 2.799625000  |
| 6 | 1.349863000  | -1.412550000 | 2.699798000  | 1 | 0.013096000  | 1.211364000  | 2.297965000  |
| 6 | -1.770834000 | -2.858049000 | -0.452465000 | 1 | -0.570764000 | 1.633922000  | 4.653747000  |
| 6 | -3.128798000 | 1.582876000  | 0.815460000  | 1 | -0.640327000 | 3.376854000  | 4.350737000  |
| 6 | -0.669792000 | 2.841615000  | 0.361510000  | 1 | -1.810921000 | 2.297323000  | 3.569866000  |
| 6 | -1.030237000 | 3.804293000  | -0.602630000 | 1 | 1.879710000  | 1.489177000  | 3.850581000  |
| 6 | -0.786561000 | 5.149976000  | -0.317612000 | 1 | 2.338269000  | 2.236235000  | 2.303762000  |
| 6 | -0.224162000 | 5.539278000  | 0.891619000  | 1 | 1.847196000  | 3.245544000  | 3.669446000  |
| 6 | 0.091940000  | 4.581647000  | 1.846592000  | 1 | -1.840942000 | 2.347752000  | -1.934213000 |
| 6 | -0.127339000 | 3.223604000  | 1.605671000  | 1 | -1.336100000 | 3.503764000  | -4.050214000 |
| 6 | 0.185900000  | 2.216112000  | 2.699307000  | 1 | 0.138159000  | 3.436699000  | -3.065859000 |
| 6 | -0.767506000 | 2.392165000  | 3.887342000  | 1 | -0.778661000 | 4.940647000  | -3.181056000 |
| 6 | 1.647319000  | 2.301022000  | 3.151352000  | 1 | -3.619196000 | 3.774009000  | -2.905958000 |
| 6 | -1.713844000 | 3.436195000  | -1.909421000 | 1 | -3.723592000 | 3.804069000  | -1.134829000 |
|   |              |              |              | 1 | -3.023394000 | 5.175800000  | -2.008963000 |



|   |              |              |              |    |              |              |              |
|---|--------------|--------------|--------------|----|--------------|--------------|--------------|
| 6 | -0.460909000 | 5.153981000  | -0.435919000 | 1  | 0.549109000  | 3.481928000  | 4.264574000  |
| 6 | -0.348880000 | 5.585979000  | 0.879074000  | 1  | -0.847429000 | 2.280169000  | -2.214351000 |
| 6 | -0.387344000 | 4.661778000  | 1.915693000  | 1  | 0.483376000  | 3.347714000  | -3.993754000 |
| 6 | -0.543673000 | 3.297836000  | 1.662872000  | 1  | 1.429748000  | 3.443829000  | -2.478294000 |
| 6 | -0.622001000 | 2.324493000  | 2.827817000  | 1  | 0.580754000  | 4.854492000  | -3.084543000 |
| 6 | -1.966853000 | 2.469717000  | 3.551581000  | 1  | -2.081249000 | 3.620257000  | -3.888425000 |
| 6 | 0.552237000  | 2.492426000  | 3.796947000  | 1  | -2.899082000 | 3.689945000  | -2.316910000 |
| 6 | -0.745417000 | 3.371279000  | -2.190683000 | 1  | -1.933635000 | 5.065756000  | -2.878140000 |
| 6 | 0.509784000  | 3.766895000  | -2.981051000 | 1  | -2.657907000 | -2.952580000 | 0.689643000  |
| 6 | -1.990470000 | 3.972391000  | -2.855343000 | 13 | 0.723157000  | 0.530182000  | -0.003472000 |
| 1 | 0.604697000  | -1.670238000 | -2.235569000 | 1  | 1.804008000  | 1.118915000  | -3.698471000 |
| 1 | 0.192090000  | -3.441834000 | -3.912834000 | 7  | -2.282936000 | -0.425094000 | -0.158514000 |
| 1 | 1.025036000  | -4.626557000 | -2.892788000 | 6  | -3.658026000 | -0.862095000 | -0.344786000 |
| 1 | -0.494571000 | -3.908042000 | -2.346535000 | 6  | -4.479063000 | -0.989999000 | 0.783722000  |
| 1 | 2.251738000  | -1.914417000 | -4.016303000 | 6  | -4.095139000 | -1.130326000 | -1.648887000 |
| 1 | 3.104697000  | -3.186016000 | -3.149813000 | 6  | -5.783708000 | -1.441932000 | 0.573743000  |
| 1 | 3.140422000  | -1.545366000 | -2.508407000 | 6  | -5.413118000 | -1.563280000 | -1.805601000 |
| 1 | 2.948389000  | -4.432879000 | -1.268705000 | 6  | -6.247039000 | -1.726529000 | -0.705392000 |
| 1 | 3.306386000  | -5.169324000 | 1.060707000  | 1  | -6.448992000 | -1.563041000 | 1.423784000  |
| 1 | 2.035018000  | -4.127015000 | 2.899995000  | 1  | -5.792060000 | -1.775704000 | -2.800664000 |
| 1 | -0.653103000 | -1.578496000 | 2.377975000  | 1  | -7.266478000 | -2.070795000 | -0.846660000 |
| 1 | -0.926371000 | -3.962825000 | 3.172577000  | 6  | -3.198375000 | -0.934650000 | -2.862218000 |
| 1 | -1.042256000 | -2.739250000 | 4.452382000  | 1  | -2.159607000 | -0.851465000 | -2.517038000 |
| 1 | 0.422005000  | -3.706272000 | 4.291598000  | 6  | -4.014884000 | -0.633034000 | 2.189139000  |
| 1 | 0.488808000  | -0.706729000 | 4.405514000  | 1  | -3.010714000 | -0.195493000 | 2.126117000  |
| 1 | 1.949660000  | -1.619401000 | 3.978052000  | 6  | -3.551418000 | 0.379262000  | -3.574059000 |
| 1 | 1.391893000  | -0.298154000 | 2.934407000  | 1  | -2.889585000 | 0.539855000  | -4.431670000 |
| 1 | -1.078337000 | -3.533453000 | 0.108892000  | 1  | -4.582189000 | 0.348224000  | -3.943229000 |
| 1 | -2.342111000 | -3.026629000 | -1.033510000 | 1  | -3.456172000 | 1.230209000  | -2.893125000 |
| 1 | -4.209298000 | 1.422196000  | -0.226515000 | 6  | -3.266482000 | -2.115864000 | -3.836660000 |
| 1 | -3.077924000 | 2.876052000  | -0.042567000 | 1  | -4.248044000 | -2.185214000 | -4.315177000 |
| 1 | -0.429563000 | 5.881207000  | -1.243215000 | 1  | -2.526436000 | -1.986836000 | -4.632339000 |
| 1 | -0.231766000 | 6.642794000  | 1.096706000  | 1  | -3.069330000 | -3.071354000 | -3.338740000 |
| 1 | -0.301597000 | 5.007973000  | 2.941878000  | 6  | -3.943062000 | -1.868298000 | 3.096708000  |
| 1 | -0.579131000 | 1.304568000  | 2.425161000  | 1  | -3.620248000 | -1.576855000 | 4.101511000  |
| 1 | -2.062670000 | 1.716370000  | 4.342168000  | 1  | -4.923640000 | -2.347241000 | 3.186583000  |
| 1 | -2.055033000 | 3.458740000  | 4.014568000  | 1  | -3.236948000 | -2.618489000 | 2.724855000  |
| 1 | -2.797900000 | 2.347849000  | 2.849488000  | 6  | -4.935369000 | 0.425536000  | 2.810160000  |
| 1 | 0.491275000  | 1.752293000  | 4.601018000  | 1  | -4.554333000 | 0.727810000  | 3.790268000  |
| 1 | 1.510373000  | 2.365135000  | 3.281544000  | 1  | -4.996172000 | 1.314743000  | 2.176010000  |

|                                   |              |              |              |   |              |              |              |
|-----------------------------------|--------------|--------------|--------------|---|--------------|--------------|--------------|
| 1                                 | -5.948232000 | 0.035470000  | 2.952970000  | 6 | 1.093778000  | -2.120854000 | 2.378660000  |
| 6                                 | 2.099409000  | 0.981009000  | -2.656665000 | 6 | 0.409283000  | -1.156201000 | 3.335566000  |
| 8                                 | 1.262077000  | 0.620730000  | -1.829157000 | 6 | -0.429850000 | -1.919110000 | 4.368004000  |
| 8                                 | 3.342521000  | 1.248842000  | -2.427667000 | 6 | 1.421084000  | -0.233184000 | 4.022014000  |
| 5                                 | 4.079815000  | 0.812508000  | -1.292410000 | 6 | -1.896200000 | -2.783478000 | 0.467699000  |
| 1                                 | 1.876340000  | 1.002565000  | 0.940368000  | 6 | -3.145874000 | 1.735385000  | -0.627522000 |
| 8                                 | 3.696018000  | -0.260018000 | -0.567165000 | 6 | -0.750804000 | 2.922767000  | 0.285737000  |
| 8                                 | 5.231490000  | 1.409627000  | -0.962125000 | 6 | -0.609042000 | 3.730779000  | -0.857640000 |
| 6                                 | 5.622639000  | 0.800760000  | 0.310853000  | 6 | -0.491943000 | 5.113747000  | -0.691797000 |
| 6                                 | 4.851080000  | -0.567891000 | 0.285796000  | 6 | -0.500047000 | 5.682543000  | 0.573379000  |
| 6                                 | 4.339902000  | -1.033353000 | 1.634421000  | 6 | -0.603807000 | 4.870203000  | 1.697985000  |
| 6                                 | 5.609772000  | -1.681356000 | -0.425923000 | 6 | -0.727254000 | 3.484940000  | 1.581358000  |
| 6                                 | 5.135938000  | 1.746106000  | 1.402896000  | 6 | -0.826210000 | 2.598117000  | 2.814859000  |
| 6                                 | 7.134606000  | 0.671916000  | 0.337127000  | 6 | -2.266130000 | 2.117728000  | 3.036029000  |
| 1                                 | 5.180528000  | -1.213305000 | 2.312920000  | 6 | -0.296200000 | 3.254935000  | 4.089249000  |
| 1                                 | 3.672198000  | -0.296898000 | 2.085591000  | 6 | -0.520331000 | 3.138987000  | -2.255910000 |
| 1                                 | 3.790671000  | -1.970558000 | 1.508295000  | 6 | 0.911106000  | 3.295987000  | -2.787709000 |
| 1                                 | 5.965788000  | -1.357586000 | -1.409618000 | 6 | -1.523847000 | 3.765687000  | -3.228440000 |
| 1                                 | 6.469815000  | -2.010263000 | 0.163484000  | 1 | 0.304830000  | -2.412374000 | -1.576520000 |
| 1                                 | 5.442705000  | 1.393633000  | 2.391339000  | 1 | 0.146508000  | -4.606282000 | -2.724429000 |
| 1                                 | 5.572532000  | 2.733503000  | 1.234637000  | 1 | 1.136976000  | -5.360561000 | -1.471627000 |
| 1                                 | 7.451889000  | 0.146943000  | 1.243779000  | 1 | -0.472044000 | -4.754056000 | -1.067552000 |
| 1                                 | 7.508227000  | 0.130838000  | -0.533805000 | 1 | 1.966921000  | -2.882335000 | -3.288237000 |
| 1                                 | 7.584986000  | 1.667410000  | 0.343416000  | 1 | 2.969661000  | -3.799328000 | -2.160389000 |
| 1                                 | 4.933785000  | -2.530738000 | -0.561679000 | 1 | 2.811883000  | -2.059954000 | -1.945787000 |
| 1                                 | 4.045098000  | 1.843544000  | 1.388977000  | 1 | 2.794064000  | -4.714250000 | 0.027646000  |
|                                   |              |              |              | 1 | 3.353769000  | -4.670883000 | 2.434149000  |
|                                   |              |              |              | 1 | 2.247281000  | -3.047673000 | 3.936282000  |
|                                   |              |              |              | 1 | -0.279452000 | -0.524632000 | 2.762279000  |
|                                   |              |              |              | 1 | -1.170932000 | -2.564461000 | 3.883784000  |
|                                   |              |              |              | 1 | -0.962000000 | -1.217227000 | 5.018321000  |
|                                   |              |              |              | 1 | 0.200924000  | -2.550376000 | 5.003326000  |
|                                   |              |              |              | 1 | 0.908359000  | 0.449489000  | 4.708022000  |
|                                   |              |              |              | 1 | 2.149845000  | -0.806700000 | 4.605602000  |
|                                   |              |              |              | 1 | 1.969031000  | 0.369330000  | 3.289874000  |
|                                   |              |              |              | 1 | -1.150325000 | -3.420137000 | 0.938023000  |
|                                   |              |              |              | 1 | -2.167099000 | -3.209398000 | -0.504114000 |
|                                   |              |              |              | 1 | -4.109087000 | 1.319265000  | -0.875821000 |
|                                   |              |              |              | 1 | -3.036932000 | 2.810511000  | -0.666965000 |
|                                   |              |              |              | 1 | -0.383299000 | 5.749210000  | -1.566911000 |
| <b>6-IM3 (in benzene solvent)</b> |              |              |              |   |              |              |              |
| 7                                 | -0.865252000 | 1.493328000  | 0.153693000  |   |              |              |              |
| 6                                 | -2.097738000 | 0.989583000  | -0.223207000 |   |              |              |              |
| 6                                 | -1.366172000 | -1.386551000 | 0.282896000  |   |              |              |              |
| 7                                 | -0.083594000 | -1.138356000 | 0.479684000  |   |              |              |              |
| 6                                 | 0.806922000  | -2.149730000 | 1.002365000  |   |              |              |              |
| 6                                 | 1.400537000  | -3.084337000 | 0.133503000  |   |              |              |              |
| 6                                 | 1.043527000  | -3.189136000 | -1.342250000 |   |              |              |              |
| 6                                 | 0.421741000  | -4.554095000 | -1.665797000 |   |              |              |              |
| 6                                 | 2.267662000  | -2.961102000 | -2.236840000 |   |              |              |              |
| 6                                 | 2.324021000  | -3.980365000 | 0.677508000  |   |              |              |              |
| 6                                 | 2.637263000  | -3.961045000 | 2.032518000  |   |              |              |              |
| 6                                 | 2.017020000  | -3.045396000 | 2.874107000  |   |              |              |              |





|   |              |              |              |    |              |              |              |
|---|--------------|--------------|--------------|----|--------------|--------------|--------------|
| 6 | 0.890061000  | -1.997158000 | -0.041058000 | 1  | 2.290547000  | 0.236149000  | 3.749305000  |
| 6 | 1.180443000  | -2.776959000 | -1.170772000 | 1  | 3.292215000  | -1.168672000 | 3.393011000  |
| 6 | 0.267352000  | -2.846491000 | -2.383815000 | 1  | 3.171288000  | 0.157699000  | 2.211855000  |
| 6 | -0.253451000 | -4.273628000 | -2.602342000 | 1  | -0.850007000 | -3.490633000 | 0.534740000  |
| 6 | 0.981132000  | -2.336360000 | -3.642446000 | 1  | -2.402243000 | -3.306988000 | -0.319097000 |
| 6 | 2.371006000  | -3.508795000 | -1.160563000 | 1  | -4.584840000 | 1.066070000  | 0.583818000  |
| 6 | 3.234588000  | -3.460069000 | -0.075860000 | 1  | -3.632584000 | 2.609491000  | 0.201507000  |
| 6 | 2.919594000  | -2.681572000 | 1.034480000  | 1  | -1.551120000 | 5.461164000  | -2.450987000 |
| 6 | 1.749543000  | -1.923044000 | 1.072711000  | 1  | -0.849894000 | 6.714782000  | -0.443895000 |
| 6 | 1.394578000  | -1.103118000 | 2.305702000  | 1  | -0.490185000 | 5.537136000  | 1.696066000  |
| 6 | 0.637271000  | -1.973073000 | 3.318342000  | 1  | -1.007387000 | 1.833852000  | 2.113469000  |
| 6 | 2.612576000  | -0.434434000 | 2.947242000  | 1  | -1.676288000 | 2.903207000  | 4.211116000  |
| 6 | -1.775100000 | -2.918295000 | 0.490093000  | 1  | -1.508913000 | 4.513414000  | 3.500229000  |
| 6 | -3.649810000 | 1.534264000  | 0.320573000  | 1  | -2.764629000 | 3.414499000  | 2.904751000  |
| 6 | -1.265539000 | 2.881688000  | -0.269149000 | 1  | 0.780191000  | 2.473447000  | 3.722367000  |
| 6 | -1.528770000 | 3.542461000  | -1.482678000 | 1  | 1.393302000  | 2.517272000  | 2.056571000  |
| 6 | -1.365085000 | 4.929177000  | -1.521847000 | 1  | 0.990152000  | 4.023196000  | 2.894961000  |
| 6 | -0.975583000 | 5.637931000  | -0.392007000 | 1  | -2.139070000 | 1.745222000  | -2.452757000 |
| 6 | -0.767948000 | 4.971764000  | 0.810390000  | 1  | -1.356034000 | 2.341487000  | -4.736721000 |
| 6 | -0.920377000 | 3.587299000  | 0.900221000  | 1  | -0.027323000 | 2.477120000  | -3.569452000 |
| 6 | -0.755793000 | 2.893066000  | 2.243433000  | 1  | -0.842672000 | 3.933853000  | -4.163946000 |
| 6 | -1.736159000 | 3.466507000  | 3.274285000  | 1  | -3.760481000 | 2.739662000  | -4.006304000 |
| 6 | 0.686912000  | 2.980048000  | 2.755636000  | 1  | -4.112403000 | 3.271398000  | -2.350275000 |
| 6 | -2.013509000 | 2.801617000  | -2.717943000 | 1  | -3.319965000 | 4.372243000  | -3.490103000 |
| 6 | -0.996596000 | 2.892335000  | -3.861824000 | 1  | -2.334696000 | -3.044003000 | 1.418187000  |
| 6 | -3.383174000 | 3.328763000  | -3.164318000 | 13 | 0.247262000  | 0.626472000  | -0.513021000 |
| 1 | -0.598756000 | -2.196617000 | -2.207338000 | 1  | 2.789296000  | 1.873685000  | -1.285760000 |
| 1 | -0.954233000 | -4.295562000 | -3.442637000 | 7  | -2.508245000 | -0.598788000 | 0.287220000  |
| 1 | 0.569010000  | -4.956850000 | -2.837720000 | 6  | -3.826330000 | -1.173698000 | 0.498201000  |
| 1 | -0.764979000 | -4.663527000 | -1.716616000 | 6  | -4.291553000 | -1.336420000 | 1.810013000  |
| 1 | 0.293329000  | -2.342539000 | -4.493553000 | 6  | -4.579925000 | -1.504115000 | -0.635126000 |
| 1 | 1.830021000  | -2.979843000 | -3.895600000 | 6  | -5.576116000 | -1.860143000 | 1.967851000  |
| 1 | 1.353650000  | -1.318776000 | -3.501300000 | 6  | -5.857007000 | -2.026891000 | -0.422698000 |
| 1 | 2.625595000  | -4.119787000 | -2.021801000 | 6  | -6.351364000 | -2.201527000 | 0.864847000  |
| 1 | 4.156922000  | -4.031904000 | -0.091378000 | 1  | -5.976637000 | -1.997968000 | 2.968070000  |
| 1 | 3.590228000  | -2.675193000 | 1.887620000  | 1  | -6.474378000 | -2.291837000 | -1.276408000 |
| 1 | 0.713990000  | -0.295329000 | 2.007136000  | 1  | -7.348547000 | -2.604221000 | 1.010464000  |
| 1 | -0.273990000 | -2.395148000 | 2.878673000  | 6  | -4.065227000 | -1.283951000 | -2.049112000 |
| 1 | 0.350861000  | -1.383826000 | 4.195462000  | 1  | -3.031164000 | -0.922176000 | -1.991739000 |
| 1 | 1.262849000  | -2.807152000 | 3.653265000  | 6  | -3.463990000 | -0.953025000 | 3.027682000  |



|    |              |              |              |   |              |              |              |
|----|--------------|--------------|--------------|---|--------------|--------------|--------------|
| 1  | -1.825843000 | -1.016065000 | 4.322310000  | 6 | 5.964767000  | -1.242397000 | -0.347875000 |
| 1  | -2.424655000 | -3.746529000 | 3.349355000  | 6 | 6.113711000  | -1.597401000 | -1.682970000 |
| 1  | -3.610012000 | -4.698021000 | 1.408451000  | 1 | 5.153333000  | -1.830646000 | -3.589115000 |
| 1  | -2.839468000 | -4.222973000 | -0.876473000 | 1 | 6.827967000  | -1.258121000 | 0.311424000  |
| 1  | 0.348614000  | -2.692736000 | -1.641005000 | 1 | 7.088039000  | -1.894041000 | -2.057640000 |
| 1  | -0.959781000 | -4.722998000 | -2.312132000 | 6 | 4.594075000  | -0.414935000 | 1.609679000  |
| 1  | -0.653938000 | -3.579473000 | -3.630263000 | 1 | 3.542636000  | -0.173767000 | 1.809090000  |
| 1  | -2.253663000 | -3.656814000 | -2.896007000 | 6 | 2.580597000  | -1.125328000 | -3.046232000 |
| 1  | -0.601976000 | -1.119117000 | -3.232722000 | 1 | 1.676329000  | -0.895118000 | -2.470349000 |
| 1  | -2.175658000 | -1.155644000 | -2.410152000 | 6 | 5.413782000  | 0.858533000  | 1.856659000  |
| 1  | -0.776886000 | -0.430050000 | -1.617873000 | 1 | 5.266278000  | 1.212251000  | 2.881662000  |
| 1  | 1.323007000  | -3.550175000 | 0.494401000  | 1 | 6.482893000  | 0.666324000  | 1.717711000  |
| 1  | 2.941224000  | -2.889867000 | 0.843315000  | 1 | 5.116197000  | 1.655344000  | 1.169626000  |
| 1  | 3.962751000  | 1.432526000  | -1.211629000 | 6 | 5.020879000  | -1.522573000 | 2.581320000  |
| 1  | 2.791483000  | 2.843847000  | -0.949210000 | 1 | 6.078032000  | -1.774594000 | 2.450810000  |
| 1  | 0.568834000  | 5.669692000  | 1.841949000  | 1 | 4.885140000  | -1.189088000 | 3.614407000  |
| 1  | -0.400833000 | 6.568576000  | -0.239559000 | 1 | 4.441494000  | -2.441536000 | 2.444311000  |
| 1  | -0.696548000 | 5.102920000  | -2.205078000 | 6 | 2.351819000  | -2.460574000 | -3.765452000 |
| 1  | 0.368737000  | 1.505138000  | -2.265564000 | 1 | 1.459303000  | -2.395995000 | -4.397223000 |
| 1  | 0.538401000  | 2.401995000  | -4.531987000 | 1 | 3.195425000  | -2.710751000 | -4.416546000 |
| 1  | 0.124396000  | 4.027675000  | -3.980909000 | 1 | 2.213874000  | -3.293715000 | -3.067117000 |
| 1  | 1.646906000  | 3.284531000  | -3.463855000 | 6 | 2.765105000  | 0.005555000  | -4.066835000 |
| 1  | -1.708809000 | 1.549716000  | -3.622145000 | 1 | 1.891520000  | 0.064539000  | -4.724995000 |
| 1  | -2.098829000 | 1.750499000  | -1.908529000 | 1 | 2.884888000  | 0.969995000  | -3.565303000 |
| 1  | -2.107977000 | 3.156305000  | -2.986427000 | 1 | 3.646515000  | -0.172502000 | -4.692150000 |
| 1  | 1.531464000  | 2.083571000  | 2.327340000  | 6 | -2.303217000 | 0.915109000  | 2.295173000  |
| 1  | 1.141975000  | 3.101781000  | 4.515696000  | 8 | -0.976608000 | 0.861518000  | 2.593122000  |
| 1  | -0.364395000 | 3.141271000  | 3.585344000  | 8 | -2.285616000 | 0.576624000  | 0.818979000  |
| 1  | 0.607981000  | 4.615127000  | 3.782778000  | 5 | -3.524350000 | 0.363580000  | 0.196381000  |
| 1  | 3.392078000  | 3.353526000  | 3.331169000  | 1 | -2.748028000 | 1.910130000  | 2.380649000  |
| 1  | 3.449373000  | 3.476831000  | 1.559622000  | 8 | -3.667080000 | 0.044301000  | -1.105940000 |
| 1  | 2.849167000  | 4.835264000  | 2.527105000  | 8 | -4.664834000 | 0.504375000  | 0.912522000  |
| 1  | 2.444249000  | -3.117688000 | -0.824625000 | 6 | -5.740461000 | 0.498660000  | -0.077852000 |
| 13 | -0.385255000 | 0.457532000  | 0.985534000  | 6 | -5.083232000 | -0.279621000 | -1.269718000 |
| 1  | -2.911853000 | 0.144610000  | 2.777652000  | 6 | -5.520810000 | 0.176073000  | -2.649558000 |
| 7  | 2.333271000  | -0.448312000 | -0.238117000 | 6 | -5.198534000 | -1.793445000 | -1.129746000 |
| 6  | 3.642719000  | -0.848308000 | -0.730423000 | 6 | -6.029826000 | 1.958576000  | -0.409265000 |
| 6  | 3.758911000  | -1.186628000 | -2.086776000 | 6 | -6.957705000 | -0.174895000 | 0.527695000  |
| 6  | 4.722723000  | -0.852147000 | 0.159416000  | 1 | -6.598974000 | 0.032384000  | -2.772621000 |
| 6  | 5.021575000  | -1.564722000 | -2.544103000 | 1 | -5.282524000 | 1.227839000  | -2.818072000 |

|                             |              |              |              |   |              |              |              |
|-----------------------------|--------------|--------------|--------------|---|--------------|--------------|--------------|
| 1                           | -5.008921000 | -0.418573000 | -3.411148000 | 6 | 1.078120000  | 3.792036000  | 3.386420000  |
| 1                           | -4.877314000 | -2.127892000 | -0.137758000 | 6 | 3.299799000  | 3.592177000  | 2.234801000  |
| 1                           | -6.225723000 | -2.127695000 | -1.299258000 | 1 | -0.201236000 | -0.864161000 | 3.000562000  |
| 1                           | -6.867063000 | 2.045254000  | -1.106901000 | 1 | 0.280291000  | -2.258928000 | 4.988990000  |
| 1                           | -6.289683000 | 2.487146000  | 0.511136000  | 1 | -0.873158000 | -3.480510000 | 4.426016000  |
| 1                           | -7.747417000 | -0.273242000 | -0.223970000 | 1 | 0.595321000  | -3.157539000 | 3.492602000  |
| 1                           | -6.716055000 | -1.165303000 | 0.917289000  | 1 | -1.470636000 | -0.307715000 | 4.962131000  |
| 1                           | -7.343576000 | 0.434226000  | 1.348922000  | 1 | -2.616819000 | -1.626418000 | 4.707758000  |
| 1                           | -4.552397000 | -2.267881000 | -1.874617000 | 1 | -2.617999000 | -0.248335000 | 3.602807000  |
| 1                           | -5.155609000 | 2.446309000  | -0.853455000 | 1 | -3.109717000 | -3.213990000 | 3.198501000  |
|                             |              |              |              | 1 | -4.120487000 | -4.315364000 | 1.234538000  |
|                             |              |              |              | 1 | -3.164172000 | -3.986473000 | -1.002773000 |
|                             |              |              |              | 1 | 0.083010000  | -2.648649000 | -1.648704000 |
|                             |              |              |              | 1 | -1.409041000 | -4.526016000 | -2.388276000 |
|                             |              |              |              | 1 | -0.939537000 | -3.419491000 | -3.687151000 |
|                             |              |              |              | 1 | -2.563195000 | -3.324927000 | -3.006719000 |
|                             |              |              |              | 1 | -0.783649000 | -1.039148000 | -3.361010000 |
|                             |              |              |              | 1 | -2.225821000 | -0.765452000 | -2.370477000 |
|                             |              |              |              | 1 | -0.622104000 | -0.296812000 | -1.781813000 |
|                             |              |              |              | 1 | 0.728160000  | -3.516651000 | 0.826366000  |
|                             |              |              |              | 1 | 2.403966000  | -3.060100000 | 1.221095000  |
|                             |              |              |              | 1 | 4.265732000  | 0.844525000  | -0.998611000 |
|                             |              |              |              | 1 | 3.303819000  | 2.429536000  | -0.957125000 |
|                             |              |              |              | 1 | 1.184559000  | 5.760266000  | 1.463703000  |
|                             |              |              |              | 1 | 0.401486000  | 6.618649000  | -0.711484000 |
|                             |              |              |              | 1 | 0.077821000  | 5.074855000  | -2.611779000 |
|                             |              |              |              | 1 | 0.756516000  | 1.387584000  | -2.407659000 |
|                             |              |              |              | 1 | 1.318889000  | 2.126794000  | -4.675242000 |
|                             |              |              |              | 1 | 1.101697000  | 3.822057000  | -4.227127000 |
|                             |              |              |              | 1 | 2.418754000  | 2.882165000  | -3.505087000 |
|                             |              |              |              | 1 | -1.097653000 | 1.650773000  | -4.037743000 |
|                             |              |              |              | 1 | -1.685083000 | 1.992259000  | -2.397879000 |
|                             |              |              |              | 1 | -1.347570000 | 3.321834000  | -3.516766000 |
|                             |              |              |              | 1 | 1.733731000  | 2.130515000  | 2.199977000  |
|                             |              |              |              | 1 | 1.469782000  | 3.341633000  | 4.303433000  |
|                             |              |              |              | 1 | 0.002866000  | 3.596634000  | 3.347158000  |
|                             |              |              |              | 1 | 1.220994000  | 4.873982000  | 3.469565000  |
|                             |              |              |              | 1 | 3.750163000  | 3.205381000  | 3.154949000  |
|                             |              |              |              | 1 | 3.846893000  | 3.180721000  | 1.382310000  |
|                             |              |              |              | 1 | 3.425635000  | 4.680385000  | 2.227290000  |
|                             |              |              |              |   |              |              |              |
| <b>6-TS5 (in gas phase)</b> |              |              |              |   |              |              |              |
| 7                           | 1.057561000  | 1.403645000  | -0.028489000 |   |              |              |              |
| 6                           | 2.242801000  | 0.750802000  | -0.309392000 |   |              |              |              |
| 6                           | 1.260889000  | -1.499458000 | 0.324222000  |   |              |              |              |
| 7                           | 0.028487000  | -1.084770000 | 0.598182000  |   |              |              |              |
| 6                           | -1.063805000 | -2.017227000 | 0.780794000  |   |              |              |              |
| 6                           | -1.579189000 | -2.210683000 | 2.070334000  |   |              |              |              |
| 6                           | -0.939059000 | -1.610154000 | 3.310168000  |   |              |              |              |
| 6                           | -0.187947000 | -2.691336000 | 4.099458000  |   |              |              |              |
| 6                           | -1.972616000 | -0.904700000 | 4.195330000  |   |              |              |              |
| 6                           | -2.694722000 | -3.042541000 | 2.209624000  |   |              |              |              |
| 6                           | -3.262148000 | -3.662511000 | 1.109179000  |   |              |              |              |
| 6                           | -2.719817000 | -3.469611000 | -0.159602000 |   |              |              |              |
| 6                           | -1.616076000 | -2.640280000 | -0.361256000 |   |              |              |              |
| 6                           | -0.996967000 | -2.472474000 | -1.749300000 |   |              |              |              |
| 6                           | -1.510636000 | -3.502023000 | -2.758623000 |   |              |              |              |
| 6                           | -1.172641000 | -1.063261000 | -2.336286000 |   |              |              |              |
| 6                           | 1.599452000  | -2.959906000 | 0.487385000  |   |              |              |              |
| 6                           | 3.344447000  | 1.361904000  | -0.783833000 |   |              |              |              |
| 6                           | 0.986679000  | 2.827749000  | -0.235487000 |   |              |              |              |
| 6                           | 1.227461000  | 3.701439000  | 0.845704000  |   |              |              |              |
| 6                           | 1.003696000  | 5.066799000  | 0.647291000  |   |              |              |              |
| 6                           | 0.573614000  | 5.554964000  | -0.580541000 |   |              |              |              |
| 6                           | 0.389075000  | 4.683809000  | -1.646912000 |   |              |              |              |
| 6                           | 0.601306000  | 3.311695000  | -1.501293000 |   |              |              |              |
| 6                           | 0.447415000  | 2.396052000  | -2.705351000 |   |              |              |              |
| 6                           | 1.378690000  | 2.835063000  | -3.842659000 |   |              |              |              |
| 6                           | -1.007313000 | 2.334215000  | -3.186291000 |   |              |              |              |
| 6                           | 1.809993000  | 3.222959000  | 2.166505000  |   |              |              |              |



|   |              |              |              |    |              |              |              |
|---|--------------|--------------|--------------|----|--------------|--------------|--------------|
| 6 | 1.245296000  | 5.064039000  | 0.704334000  | 1  | -1.047039000 | 3.450231000  | -3.508123000 |
| 6 | 1.085185000  | 5.639563000  | -0.552588000 | 1  | 1.880296000  | 2.049175000  | 2.072565000  |
| 6 | 0.948141000  | 4.839207000  | -1.679571000 | 1  | 0.097304000  | 2.218244000  | 3.781457000  |
| 6 | 0.958477000  | 3.446102000  | -1.575140000 | 1  | -0.668223000 | 2.249112000  | 2.178925000  |
| 6 | 0.810774000  | 2.568185000  | -2.807423000 | 1  | -0.468033000 | 3.744459000  | 3.072710000  |
| 6 | 1.667057000  | 3.056599000  | -3.979667000 | 1  | 2.450496000  | 3.242638000  | 4.100599000  |
| 6 | -0.664750000 | 2.464913000  | -3.220919000 | 1  | 3.255718000  | 4.042583000  | 2.737597000  |
| 6 | 1.398886000  | 3.023680000  | 2.222987000  | 1  | 1.815680000  | 4.763772000  | 3.480195000  |
| 6 | 0.016273000  | 2.788051000  | 2.849421000  | 1  | 1.893907000  | -3.400296000 | -0.295081000 |
| 6 | 2.283142000  | 3.819023000  | 3.185632000  | 13 | -0.543896000 | 0.699178000  | 0.040400000  |
| 1 | -1.267671000 | -0.121022000 | 2.400796000  | 7  | 2.214238000  | -0.661450000 | 0.057914000  |
| 1 | -0.013787000 | -0.995177000 | 4.371314000  | 6  | 3.523437000  | -1.294779000 | 0.009849000  |
| 1 | -0.477826000 | -2.649239000 | 3.935510000  | 6  | 3.961384000  | -1.805173000 | -1.219138000 |
| 1 | 0.593359000  | -1.719041000 | 2.875384000  | 6  | 4.291563000  | -1.322849000 | 1.180515000  |
| 1 | -2.363967000 | -0.118078000 | 4.526025000  | 6  | 5.231942000  | -2.383382000 | -1.248806000 |
| 1 | -2.890123000 | -1.792304000 | 4.364934000  | 6  | 5.554683000  | -1.911424000 | 1.096148000  |
| 1 | -3.560359000 | -0.539150000 | 3.284253000  | 6  | 6.020019000  | -2.437200000 | -0.104346000 |
| 1 | -3.550564000 | -2.972620000 | 2.650348000  | 1  | 5.612736000  | -2.787915000 | -2.182280000 |
| 1 | -4.130334000 | -4.430473000 | 0.752587000  | 1  | 6.184354000  | -1.952455000 | 1.980286000  |
| 1 | -2.932337000 | -4.240933000 | -1.383752000 | 1  | 7.006292000  | -2.887576000 | -0.149413000 |
| 1 | 0.218043000  | -2.645582000 | -1.881444000 | 6  | 3.804055000  | -0.726869000 | 2.492062000  |
| 1 | -1.141715000 | -4.563815000 | -2.748744000 | 1  | 2.763388000  | -0.403248000 | 2.360990000  |
| 1 | -0.675706000 | -3.399436000 | -3.996137000 | 6  | 3.130040000  | -1.714223000 | -2.490358000 |
| 1 | -2.330775000 | -3.405185000 | -3.380176000 | 1  | 2.148397000  | -1.292974000 | -2.236874000 |
| 1 | -0.955685000 | -1.056809000 | -3.661773000 | 6  | 4.626238000  | 0.514079000  | 2.866074000  |
| 1 | -2.101250000 | -0.718808000 | -2.355848000 | 1  | 4.247820000  | 0.951619000  | 3.795437000  |
| 1 | -0.356078000 | -0.368244000 | -2.179354000 | 1  | 5.677747000  | 0.250966000  | 3.022288000  |
| 1 | 0.563596000  | -3.444263000 | 0.889641000  | 1  | 4.574444000  | 1.273166000  | 2.080065000  |
| 1 | 2.216731000  | -2.994952000 | 1.382833000  | 6  | 3.832390000  | -1.755178000 | 3.630022000  |
| 1 | 4.353024000  | 0.832206000  | -0.550341000 | 1  | 4.856639000  | -2.068088000 | 3.855513000  |
| 1 | 3.419492000  | 2.424972000  | -0.708070000 | 1  | 3.412306000  | -1.318039000 | 4.540838000  |
| 1 | 1.366383000  | 5.704239000  | 1.572200000  | 1  | 3.255439000  | -2.654428000 | 3.389176000  |
| 1 | 1.075743000  | 6.720135000  | -0.653426000 | 6  | 2.898804000  | -3.091792000 | -3.124727000 |
| 1 | 0.835270000  | 5.303397000  | -2.654635000 | 1  | 2.243121000  | -2.997543000 | -3.996316000 |
| 1 | 1.172231000  | 1.564929000  | -2.548084000 | 1  | 3.840130000  | -3.532956000 | -3.467051000 |
| 1 | 1.621227000  | 2.336005000  | -4.801968000 | 1  | 2.436857000  | -3.799574000 | -2.427577000 |
| 1 | 1.313229000  | 4.016430000  | -4.368306000 | 6  | 3.783893000  | -0.762092000 | -3.501417000 |
| 1 | 2.713558000  | 3.173516000  | -3.682444000 | 1  | 3.163388000  | -0.680493000 | -4.399452000 |
| 1 | -0.781164000 | 1.793587000  | -4.078567000 | 1  | 3.909310000  | 0.237650000  | -3.076286000 |
| 1 | -1.308268000 | 2.099527000  | -2.410003000 | 1  | 4.767997000  | -1.133833000 | -3.805304000 |

|                              |              |              |              |   |              |              |              |
|------------------------------|--------------|--------------|--------------|---|--------------|--------------|--------------|
| 8                            | -2.110822000 | 1.253872000  | 0.029158000  | 6 | 3.457602000  | -1.975903000 | 1.574667000  |
| 5                            | -3.421373000 | 0.883462000  | -0.045510000 | 6 | 3.137053000  | 0.969212000  | -2.233438000 |
| 8                            | -4.142588000 | 0.953873000  | -1.204354000 | 6 | 0.566912000  | 1.924224000  | -1.751335000 |
| 8                            | -4.123352000 | 0.400325000  | 1.025534000  | 6 | 0.799907000  | 3.300631000  | -1.586346000 |
| 6                            | -5.512282000 | 0.356106000  | 0.611434000  | 6 | 0.087853000  | 4.183815000  | -2.397254000 |
| 6                            | -5.390132000 | 0.263015000  | -0.948885000 | 6 | -0.813423000 | 3.720312000  | -3.349953000 |
| 6                            | -6.504406000 | 0.950716000  | -1.718108000 | 6 | -0.984245000 | 2.354363000  | -3.536050000 |
| 6                            | -5.196700000 | -1.169955000 | -1.435021000 | 6 | -0.285680000 | 1.431326000  | -2.753689000 |
| 6                            | -6.155644000 | 1.658376000  | 1.078751000  | 6 | -0.431272000 | -0.054715000 | -3.038317000 |
| 6                            | -6.179102000 | -0.840102000 | 1.269123000  | 6 | 0.042530000  | -0.382634000 | -4.460068000 |
| 1                            | -7.471684000 | 0.499084000  | -1.474671000 | 6 | -1.865050000 | -0.545125000 | -2.811276000 |
| 1                            | -6.546363000 | 2.017540000  | -1.491867000 | 6 | 1.807059000  | 3.845432000  | -0.586816000 |
| 1                            | -6.334033000 | 0.834970000  | -2.791730000 | 6 | 1.141139000  | 4.734325000  | 0.470839000  |
| 1                            | -4.396059000 | -1.661441000 | -0.871730000 | 6 | 2.914901000  | 4.621290000  | -1.312178000 |
| 1                            | -6.111531000 | -1.760141000 | -1.327935000 | 1 | 1.412057000  | 0.685933000  | 3.052548000  |
| 1                            | -7.226001000 | 1.676336000  | 0.855537000  | 1 | 2.769689000  | 0.879519000  | 5.107844000  |
| 1                            | -6.024238000 | 1.750444000  | 2.159997000  | 1 | 2.074696000  | -0.628657000 | 5.726302000  |
| 1                            | -7.202086000 | -0.961927000 | 0.898297000  | 1 | 3.096897000  | -0.656248000 | 4.281954000  |
| 1                            | -5.620011000 | -1.758784000 | 1.076576000  | 1 | 0.492037000  | 2.004867000  | 4.874626000  |
| 1                            | -6.227652000 | -0.684635000 | 2.350984000  | 1 | -0.204614000 | 0.585079000  | 5.650657000  |
| 1                            | -4.918456000 | -1.149970000 | -2.493089000 | 1 | -0.858842000 | 1.152969000  | 4.105854000  |
| 1                            | -5.685374000 | 2.523494000  | 0.600672000  | 1 | -0.359356000 | -1.606220000 | 5.441754000  |
|                              |              |              |              | 1 | -1.210485000 | -3.834216000 | 4.817086000  |
|                              |              |              |              | 1 | -0.779597000 | -4.750530000 | 2.572935000  |
| <b>6-TS5' (in gas phase)</b> |              |              |              | 1 | 1.495324000  | -3.181885000 | 0.121377000  |
| 7                            | 1.171836000  | 0.984000000  | -0.836762000 | 1 | 1.367034000  | -5.456512000 | 1.198278000  |
| 6                            | 2.456191000  | 0.549718000  | -1.151280000 | 1 | 0.988944000  | -5.433780000 | -0.534082000 |
| 6                            | 2.552538000  | -1.041729000 | 0.813728000  | 1 | -0.312600000 | -5.583212000 | 0.641740000  |
| 7                            | 1.295627000  | -0.883857000 | 1.213753000  | 1 | -0.270547000 | -3.462487000 | -1.549707000 |
| 6                            | 0.708356000  | -1.727500000 | 2.232583000  | 1 | -1.518992000 | -3.530701000 | -0.289218000 |
| 6                            | 0.509980000  | -1.198580000 | 3.516967000  | 1 | -0.650826000 | -2.031515000 | -0.584587000 |
| 6                            | 1.085052000  | 0.142244000  | 3.947323000  | 1 | 3.849390000  | -2.757334000 | 0.919733000  |
| 6                            | 2.333150000  | -0.080001000 | 4.814617000  | 1 | 2.923431000  | -2.429278000 | 2.406958000  |
| 6                            | 0.062763000  | 1.017042000  | 4.681135000  | 1 | 4.143115000  | 0.651658000  | -2.456090000 |
| 6                            | -0.190217000 | -1.985085000 | 4.438377000  | 1 | 2.661924000  | 1.668420000  | -2.907791000 |
| 6                            | -0.664589000 | -3.241294000 | 4.090486000  | 1 | 0.237923000  | 5.253921000  | -2.279512000 |
| 6                            | -0.424405000 | -3.755387000 | 2.818190000  | 1 | -1.363524000 | 4.425801000  | -3.965349000 |
| 6                            | 0.268324000  | -3.015299000 | 1.861119000  | 1 | -1.660634000 | 1.996428000  | -4.308131000 |
| 6                            | 0.530636000  | -3.574732000 | 0.467197000  | 1 | 0.227518000  | -0.601993000 | -2.352648000 |
| 6                            | 0.651012000  | -5.100675000 | 0.451257000  | 1 | 0.000160000  | -1.462784000 | -4.635519000 |
| 6                            | -0.534596000 | -3.121529000 | -0.542138000 |   |              |              |              |

|    |              |              |              |   |              |              |              |
|----|--------------|--------------|--------------|---|--------------|--------------|--------------|
| 1  | -0.590659000 | 0.102636000  | -5.210073000 | 6 | 3.490435000  | -2.356792000 | -3.660640000 |
| 1  | 1.072178000  | -0.046808000 | -4.616148000 | 1 | 2.628484000  | -2.865495000 | -4.103693000 |
| 1  | -2.553843000 | -0.064923000 | -3.517199000 | 1 | 3.432202000  | -1.295627000 | -3.916782000 |
| 1  | -1.925566000 | -1.628003000 | -2.965801000 | 1 | 4.395477000  | -2.772933000 | -4.115266000 |
| 1  | -2.212915000 | -0.331577000 | -1.794640000 | 8 | -1.570266000 | 0.064911000  | 0.607820000  |
| 1  | 2.275277000  | 2.996466000  | -0.074005000 | 6 | -2.339827000 | -0.782905000 | 1.454040000  |
| 1  | 1.885657000  | 5.095118000  | 1.187862000  | 1 | -2.113238000 | -1.822245000 | 1.202360000  |
| 1  | 0.359185000  | 4.194334000  | 1.010674000  | 1 | -2.096279000 | -0.571021000 | 2.498745000  |
| 1  | 0.675908000  | 5.610202000  | 0.005045000  | 8 | -3.683850000 | -0.501009000 | 1.272539000  |
| 1  | 3.675677000  | 4.957137000  | -0.600175000 | 5 | -4.385634000 | -1.138884000 | 0.287485000  |
| 1  | 3.403000000  | 4.001498000  | -2.070784000 | 8 | -3.870006000 | -2.120998000 | -0.521767000 |
| 1  | 2.510209000  | 5.508517000  | -1.810284000 | 8 | -5.687713000 | -0.822135000 | 0.039483000  |
| 1  | 4.318305000  | -1.417584000 | 1.953816000  | 6 | -5.011950000 | -2.680102000 | -1.226483000 |
| 13 | 0.131273000  | 0.332513000  | 0.454212000  | 6 | -6.033280000 | -1.492704000 | -1.195266000 |
| 7  | 3.080887000  | -0.394607000 | -0.240487000 | 6 | -5.803372000 | -0.485419000 | -2.319343000 |
| 6  | 4.449793000  | -0.744899000 | -0.589394000 | 6 | -7.492123000 | -1.912083000 | -1.138839000 |
| 6  | 4.647676000  | -1.794505000 | -1.497309000 | 6 | -4.577171000 | -3.107913000 | -2.616651000 |
| 6  | 5.494635000  | -0.005256000 | -0.022869000 | 6 | -5.481773000 | -3.885034000 | -0.415865000 |
| 6  | 5.967187000  | -2.110234000 | -1.825866000 | 1 | -4.650468000 | -4.587591000 | -0.309618000 |
| 6  | 6.795255000  | -0.357844000 | -0.389407000 | 1 | -5.808854000 | -3.582512000 | 0.583962000  |
| 6  | 7.030305000  | -1.400291000 | -1.278520000 | 1 | -6.309350000 | -4.400342000 | -0.910917000 |
| 1  | 6.164022000  | -2.916472000 | -2.526901000 | 1 | -3.830665000 | -3.904254000 | -2.538921000 |
| 1  | 7.634212000  | 0.194349000  | 0.023567000  | 1 | -4.140598000 | -2.277806000 | -3.174613000 |
| 1  | 8.048670000  | -1.658217000 | -1.550714000 | 1 | -5.432758000 | -3.496968000 | -3.178295000 |
| 6  | 5.249452000  | 1.156446000  | 0.926626000  | 1 | -4.748399000 | -0.193590000 | -2.372364000 |
| 1  | 4.190279000  | 1.151956000  | 1.214237000  | 1 | -6.396349000 | 0.409679000  | -2.113795000 |
| 6  | 3.497497000  | -2.557128000 | -2.139290000 | 1 | -6.105690000 | -0.889299000 | -3.289860000 |
| 1  | 2.550931000  | -2.154589000 | -1.755988000 | 1 | -7.755377000 | -2.502609000 | -2.022559000 |
| 6  | 5.527478000  | 2.489382000  | 0.218510000  | 1 | -8.127352000 | -1.022736000 | -1.120581000 |
| 1  | 5.305468000  | 3.328307000  | 0.886239000  | 1 | -7.703409000 | -2.500357000 | -0.244102000 |
| 1  | 6.581092000  | 2.558026000  | -0.072974000 | 1 | -0.200764000 | 1.659231000  | 1.679040000  |
| 1  | 4.914279000  | 2.590107000  | -0.681716000 | 5 | -1.401845000 | 1.927563000  | 1.375536000  |
| 6  | 6.081188000  | 1.041064000  | 2.209548000  | 8 | -2.367432000 | 1.983412000  | 2.326336000  |
| 1  | 7.151192000  | 1.134017000  | 2.000113000  | 8 | -1.538585000 | 2.769475000  | 0.315684000  |
| 1  | 5.812555000  | 1.843635000  | 2.902654000  | 6 | -3.273576000 | 3.051940000  | 1.893856000  |
| 1  | 5.924247000  | 0.084242000  | 2.718766000  | 6 | -2.916220000 | 3.240213000  | 0.370896000  |
| 6  | 3.549027000  | -4.052846000 | -1.801175000 | 6 | -3.729440000 | 2.360248000  | -0.573043000 |
| 1  | 2.693086000  | -4.567625000 | -2.250110000 | 6 | -2.930519000 | 4.681430000  | -0.111517000 |
| 1  | 4.458434000  | -4.514876000 | -2.198466000 | 6 | -4.702615000 | 2.606624000  | 2.149157000  |
| 1  | 3.526925000  | -4.238969000 | -0.721524000 | 6 | -2.917653000 | 4.265621000  | 2.745573000  |



|                             |              |              |              |   |              |              |              |
|-----------------------------|--------------|--------------|--------------|---|--------------|--------------|--------------|
| 1                           | -3.026951000 | 3.999972000  | 3.800102000  | 6 | 0.125249000  | -2.387028000 | 1.183072000  |
| 1                           | -1.881943000 | 4.578087000  | 2.575990000  | 6 | -0.462454000 | -2.331989000 | 2.454038000  |
| 1                           | -3.577323000 | 5.110529000  | 2.529599000  | 6 | -0.232327000 | -1.180951000 | 3.420900000  |
| 1                           | -4.860715000 | 2.490310000  | 3.224674000  | 6 | 0.747377000  | -1.606634000 | 4.524076000  |
| 1                           | -4.918338000 | 1.653680000  | 1.663381000  | 6 | -1.539733000 | -0.654310000 | 4.023536000  |
| 1                           | -5.401215000 | 3.366215000  | 1.782407000  | 6 | -1.226320000 | -3.431237000 | 2.860203000  |
| 1                           | -3.731592000 | 1.322180000  | -0.237189000 | 6 | -1.379681000 | -4.536935000 | 2.038156000  |
| 1                           | -3.270150000 | 2.407707000  | -1.566151000 | 6 | -0.762126000 | -4.574538000 | 0.790169000  |
| 1                           | -4.764536000 | 2.707424000  | -0.643291000 | 6 | -0.001966000 | -3.502401000 | 0.332240000  |
| 1                           | -3.935165000 | 5.105971000  | -0.015310000 | 6 | 0.646306000  | -3.527432000 | -1.044908000 |
| 1                           | -2.642170000 | 4.706384000  | -1.166238000 | 6 | 1.006435000  | -4.938150000 | -1.516230000 |
| 1                           | -2.228601000 | 5.301229000  | 0.450191000  | 6 | -0.247882000 | -2.837271000 | -2.084095000 |
| <b>6-TS6 (in gas phase)</b> |              |              |              | 6 | 2.947040000  | -2.308296000 | 1.295582000  |
|                             |              |              |              | 6 | 3.300945000  | 1.766736000  | -1.264872000 |
| 1                           | -1.043100000 | 0.939706000  | 1.513031000  | 6 | 0.572278000  | 2.458543000  | -1.179416000 |
| 5                           | -2.132565000 | 1.311449000  | 0.945007000  | 6 | 0.661838000  | 3.700976000  | -0.527907000 |
| 8                           | -3.338377000 | 0.910201000  | 1.458105000  | 6 | 0.064187000  | 4.804378000  | -1.136975000 |
| 8                           | -2.078135000 | 2.600966000  | 0.511678000  | 6 | -0.588644000 | 4.685471000  | -2.358527000 |
| 6                           | -4.170570000 | 2.112641000  | 1.474722000  | 6 | -0.636597000 | 3.455443000  | -3.002962000 |
| 6                           | -3.457500000 | 3.053325000  | 0.434942000  | 6 | -0.058103000 | 2.320242000  | -2.430836000 |
| 6                           | -3.923559000 | 2.850306000  | -1.002836000 | 6 | -0.072369000 | 1.007100000  | -3.198212000 |
| 6                           | -3.476207000 | 4.530100000  | 0.793159000  | 6 | 0.965863000  | 1.045226000  | -4.328654000 |
| 6                           | -5.583510000 | 1.714315000  | 1.087932000  | 6 | -1.458837000 | 0.644206000  | -3.740159000 |
| 6                           | -4.117199000 | 2.646997000  | 2.901608000  | 6 | 1.383950000  | 3.875898000  | 0.798235000  |
| 1                           | -4.461857000 | 1.866556000  | 3.585302000  | 6 | 0.412081000  | 4.263276000  | 1.920044000  |
| 1                           | -3.093962000 | 2.920684000  | 3.180282000  | 6 | 2.505335000  | 4.915432000  | 0.676026000  |
| 1                           | -4.758239000 | 3.524554000  | 3.023094000  | 1 | 0.244842000  | -0.354962000 | 2.879348000  |
| 1                           | -6.004532000 | 1.058406000  | 1.856182000  | 1 | 0.936899000  | -0.774577000 | 5.209076000  |
| 1                           | -5.587671000 | 1.186061000  | 0.131980000  | 1 | 0.335695000  | -2.438286000 | 5.105268000  |
| 1                           | -6.221734000 | 2.600633000  | 1.010604000  | 1 | 1.705723000  | -1.932412000 | 4.105973000  |
| 1                           | -3.936931000 | 1.793327000  | -1.280259000 | 1 | -1.343242000 | 0.248442000  | 4.610809000  |
| 1                           | -3.226479000 | 3.374357000  | -1.663599000 | 1 | -1.985747000 | -1.390557000 | 4.699971000  |
| 1                           | -4.926093000 | 3.263308000  | -1.151031000 | 1 | -2.279281000 | -0.412231000 | 3.253560000  |
| 1                           | -4.503722000 | 4.907517000  | 0.815219000  | 1 | -1.689900000 | -3.422888000 | 3.842458000  |
| 1                           | -2.920123000 | 5.084624000  | 0.031561000  | 1 | -1.968145000 | -5.385170000 | 2.375091000  |
| 1                           | -3.008692000 | 4.716441000  | 1.762098000  | 1 | -0.878848000 | -5.455349000 | 0.167360000  |
| 7                           | 1.062216000  | 1.274774000  | -0.514547000 | 1 | 1.586672000  | -2.963666000 | -0.995786000 |
| 6                           | 2.416040000  | 0.990254000  | -0.613623000 | 1 | 1.597172000  | -5.474072000 | -0.766893000 |
| 6                           | 2.166970000  | -1.193442000 | 0.646236000  | 1 | 1.590941000  | -4.882787000 | -2.438927000 |
| 7                           | 0.835459000  | -1.223801000 | 0.689032000  | 1 | 0.112642000  | -5.530521000 | -1.735480000 |

|    |              |              |              |   |              |              |              |
|----|--------------|--------------|--------------|---|--------------|--------------|--------------|
| 1  | 0.256426000  | -2.789679000 | -3.055501000 | 6 | 4.751355000  | 2.411613000  | 2.133662000  |
| 1  | -1.185190000 | -3.391656000 | -2.198603000 | 1 | 4.240955000  | 2.974135000  | 2.922622000  |
| 1  | -0.516587000 | -1.815875000 | -1.790668000 | 1 | 5.828106000  | 2.584007000  | 2.236838000  |
| 1  | 2.274647000  | -3.025273000 | 1.760639000  | 1 | 4.431238000  | 2.804568000  | 1.164151000  |
| 1  | 3.615675000  | -1.889032000 | 2.052237000  | 6 | 4.859370000  | 0.378043000  | 3.623672000  |
| 1  | 4.356568000  | 1.551816000  | -1.308473000 | 1 | 5.928387000  | 0.536537000  | 3.795717000  |
| 1  | 2.938077000  | 2.656772000  | -1.761516000 | 1 | 4.318346000  | 0.901918000  | 4.417185000  |
| 1  | 0.109607000  | 5.773171000  | -0.646343000 | 1 | 4.661474000  | -0.694048000 | 3.727663000  |
| 1  | -1.047290000 | 5.556478000  | -2.816818000 | 6 | 4.192490000  | -3.080254000 | -2.375580000 |
| 1  | -1.128314000 | 3.375015000  | -3.968469000 | 1 | 3.573883000  | -3.420551000 | -3.212588000 |
| 1  | 0.239780000  | 0.204198000  | -2.519150000 | 1 | 5.225742000  | -3.374627000 | -2.585906000 |
| 1  | 0.991043000  | 0.087176000  | -4.859435000 | 1 | 3.870320000  | -3.619067000 | -1.477553000 |
| 1  | 0.717264000  | 1.827915000  | -5.053450000 | 6 | 4.495831000  | -0.860666000 | -3.521464000 |
| 1  | 1.965596000  | 1.250556000  | -3.933522000 | 1 | 3.858468000  | -1.189223000 | -4.348212000 |
| 1  | -1.765003000 | 1.327943000  | -4.538607000 | 1 | 4.409313000  | 0.225482000  | -3.431829000 |
| 1  | -1.439533000 | -0.364058000 | -4.169599000 | 1 | 5.531709000  | -1.103330000 | -3.780038000 |
| 1  | -2.222106000 | 0.675249000  | -2.956700000 | 8 | -1.819343000 | 0.107624000  | -0.478655000 |
| 1  | 1.846664000  | 2.919056000  | 1.066197000  | 5 | -2.850050000 | -0.808257000 | -0.623062000 |
| 1  | -0.375965000 | 3.514933000  | 2.041564000  | 8 | -4.033212000 | -0.489428000 | -1.217875000 |
| 1  | -0.075160000 | 5.219360000  | 1.697706000  | 8 | -2.755002000 | -2.099509000 | -0.195205000 |
| 1  | 0.950099000  | 4.373467000  | 2.867439000  | 6 | -4.744086000 | -1.744297000 | -1.390211000 |
| 1  | 3.059168000  | 4.991481000  | 1.617219000  | 6 | -4.102090000 | -2.639720000 | -0.278025000 |
| 1  | 3.210870000  | 4.647355000  | -0.116846000 | 6 | -4.731615000 | -2.429459000 | 1.095713000  |
| 1  | 2.102546000  | 5.907684000  | 0.448155000  | 6 | -4.032754000 | -4.116560000 | -0.622395000 |
| 1  | 3.577108000  | -2.818162000 | 0.563161000  | 6 | -6.232992000 | -1.498513000 | -1.224278000 |
| 13 | -0.195557000 | 0.193386000  | 0.124440000  | 6 | -4.427923000 | -2.229306000 | -2.802182000 |
| 7  | 2.877780000  | -0.208962000 | 0.065690000  | 1 | -4.722883000 | -1.455925000 | -3.516172000 |
| 6  | 4.323325000  | -0.381325000 | 0.048548000  | 1 | -3.354247000 | -2.412253000 | -2.922143000 |
| 6  | 4.894858000  | -1.046675000 | -1.044507000 | 1 | -4.968902000 | -3.149126000 | -3.040728000 |
| 6  | 5.070232000  | 0.147808000  | 1.108209000  | 1 | -6.588143000 | -0.842054000 | -2.023354000 |
| 6  | 6.282495000  | -1.201936000 | -1.038768000 | 1 | -6.456892000 | -1.028515000 | -0.264665000 |
| 6  | 6.454456000  | -0.028715000 | 1.061870000  | 1 | -6.783258000 | -2.442875000 | -1.289007000 |
| 6  | 7.054739000  | -0.700986000 | 0.003343000  | 1 | -4.788739000 | -1.362927000 | 1.338558000  |
| 1  | 6.765171000  | -1.712624000 | -1.867239000 | 1 | -4.097261000 | -2.916012000 | 1.842761000  |
| 1  | 7.070252000  | 0.369837000  | 1.862774000  | 1 | -5.733654000 | -2.864765000 | 1.147380000  |
| 1  | 8.132300000  | -0.828488000 | -0.013649000 | 1 | -5.037850000 | -4.508670000 | -0.809831000 |
| 6  | 4.429868000  | 0.915679000  | 2.253355000  | 1 | -3.600414000 | -4.669011000 | 0.215627000  |
| 1  | 3.340279000  | 0.806858000  | 2.178490000  | 1 | -3.417608000 | -4.294435000 | -1.507809000 |
| 6  | 4.075399000  | -1.558187000 | -2.220753000 |   |              |              |              |
| 1  | 3.019710000  | -1.311485000 | -2.048232000 |   |              |              |              |

6-TS7 (in gas phase)

|   |              |              |              |    |              |              |              |
|---|--------------|--------------|--------------|----|--------------|--------------|--------------|
| 7 | 1.372783000  | -0.653538000 | -0.255709000 | 1  | -0.659952000 | -1.784482000 | 2.193822000  |
| 6 | 1.295560000  | 0.737787000  | -0.243601000 | 1  | -1.825648000 | 0.231113000  | 3.038260000  |
| 6 | -1.172680000 | 0.725631000  | 0.337121000  | 1  | -1.026813000 | -0.648589000 | 4.352484000  |
| 7 | -1.366236000 | -0.574341000 | 0.191937000  | 1  | -2.784029000 | -0.774833000 | 4.135444000  |
| 6 | -2.625293000 | -1.231900000 | 0.451048000  | 1  | -0.614123000 | -3.156418000 | 4.153675000  |
| 6 | -3.644520000 | -1.217836000 | -0.517121000 | 1  | -2.365721000 | -3.338314000 | 4.190695000  |
| 6 | -3.580595000 | -0.385911000 | -1.789664000 | 1  | -1.427024000 | -4.090248000 | 2.885509000  |
| 6 | -4.690377000 | 0.676231000  | -1.800735000 | 1  | -3.175504000 | 0.995102000  | 1.046036000  |
| 6 | -3.690623000 | -1.257692000 | -3.046920000 | 1  | -2.608654000 | 2.254323000  | -0.079194000 |
| 6 | -4.783774000 | -1.988136000 | -0.260719000 | 1  | 2.293095000  | 2.616067000  | -0.433434000 |
| 6 | -4.900545000 | -2.740558000 | 0.899912000  | 1  | 3.300485000  | 1.089762000  | -0.728017000 |
| 6 | -3.877846000 | -2.734827000 | 1.843582000  | 1  | 4.854836000  | -2.446451000 | -2.689569000 |
| 6 | -2.720154000 | -1.984147000 | 1.641046000  | 1  | 6.147851000  | -2.924815000 | -0.643743000 |
| 6 | -1.625679000 | -1.925089000 | 2.697517000  | 1  | 5.264319000  | -2.278660000 | 1.564905000  |
| 6 | -1.827273000 | -0.704937000 | 3.607602000  | 1  | 2.126294000  | -0.297448000 | 2.010309000  |
| 6 | -1.507475000 | -3.205369000 | 3.524634000  | 1  | 3.496009000  | -0.128124000 | 4.009012000  |
| 6 | -2.321846000 | 1.604324000  | 0.753339000  | 1  | 4.700617000  | -1.242292000 | 3.370909000  |
| 6 | 2.346994000  | 1.540371000  | -0.487952000 | 1  | 4.480850000  | 0.343921000  | 2.610545000  |
| 6 | 2.688530000  | -1.230164000 | -0.379753000 | 1  | 1.741671000  | -1.996283000 | 3.770040000  |
| 6 | 3.193857000  | -1.559137000 | -1.649535000 | 1  | 1.440358000  | -2.724591000 | 2.176079000  |
| 6 | 4.446428000  | -2.177895000 | -1.718980000 | 1  | 2.947241000  | -3.066303000 | 3.029466000  |
| 6 | 5.178125000  | -2.442921000 | -0.570851000 | 1  | 1.499758000  | -0.757095000 | -2.674661000 |
| 6 | 4.675844000  | -2.078336000 | 0.674926000  | 1  | 1.504157000  | -2.294068000 | -4.590089000 |
| 6 | 3.433161000  | -1.458900000 | 0.795178000  | 1  | 1.605647000  | -3.252781000 | -3.099446000 |
| 6 | 2.885841000  | -1.074101000 | 2.160246000  | 1  | 3.048015000  | -2.995838000 | -4.083116000 |
| 6 | 3.957526000  | -0.491221000 | 3.085473000  | 1  | 2.668625000  | -0.000386000 | -4.703610000 |
| 6 | 2.209785000  | -2.283478000 | 2.821436000  | 1  | 3.450024000  | 0.666358000  | -3.257408000 |
| 6 | 2.447101000  | -1.242364000 | -2.934941000 | 1  | 4.191947000  | -0.689287000 | -4.124079000 |
| 6 | 2.130788000  | -2.519714000 | -3.721843000 | 1  | -2.029513000 | 2.253402000  | 1.580662000  |
| 6 | 3.238222000  | -0.256747000 | -3.804637000 | 13 | -0.031085000 | -1.746160000 | -0.338760000 |
| 1 | -2.611872000 | 0.128117000  | -1.826351000 | 1  | -0.137524000 | -4.334903000 | -1.816378000 |
| 1 | -4.599404000 | 1.308942000  | -2.688888000 | 7  | 0.012009000  | 1.325934000  | 0.101378000  |
| 1 | -5.677515000 | 0.203737000  | -1.829581000 | 6  | 0.019691000  | 2.779092000  | 0.153967000  |
| 1 | -4.658305000 | 1.317417000  | -0.915017000 | 6  | 0.333690000  | 3.404873000  | 1.367485000  |
| 1 | -3.611690000 | -0.635208000 | -3.943251000 | 6  | -0.256846000 | 3.478995000  | -1.027330000 |
| 1 | -4.656160000 | -1.772179000 | -3.085105000 | 6  | 0.358385000  | 4.800592000  | 1.375351000  |
| 1 | -2.897993000 | -2.008404000 | -3.086514000 | 6  | -0.222010000 | 4.873588000  | -0.965315000 |
| 1 | -5.594003000 | -1.992339000 | -0.984439000 | 6  | 0.083141000  | 5.528188000  | 0.222493000  |
| 1 | -5.794059000 | -3.331035000 | 1.074853000  | 1  | 0.601124000  | 5.324716000  | 2.295216000  |
| 1 | -3.984558000 | -3.323018000 | 2.748788000  | 1  | -0.427511000 | 5.453146000  | -1.860872000 |





|   |              |              |              |    |              |              |              |
|---|--------------|--------------|--------------|----|--------------|--------------|--------------|
| 6 | -1.911023000 | -0.431047000 | 3.789277000  | 1  | 0.436363000  | -4.836532000 | -1.305970000 |
| 6 | -0.880301000 | -3.134855000 | -1.666040000 | 1  | -1.137015000 | -5.279229000 | -1.987085000 |
| 6 | -1.959377000 | -2.710493000 | -2.668947000 | 1  | 4.010760000  | 1.646367000  | -0.261773000 |
| 6 | -0.341125000 | -4.528050000 | -2.012109000 | 13 | -0.692762000 | 0.498083000  | 0.155136000  |
| 1 | -0.280676000 | 1.484642000  | -2.434717000 | 7  | 2.251812000  | -0.463072000 | -0.226576000 |
| 1 | 0.396582000  | 2.166010000  | -4.708677000 | 6  | 3.627007000  | -0.917097000 | -0.377228000 |
| 1 | 0.621460000  | 3.834930000  | -4.155140000 | 6  | 4.464490000  | -0.862396000 | 0.745650000  |
| 1 | 1.664427000  | 2.549569000  | -3.527716000 | 6  | 4.037902000  | -1.405408000 | -1.623447000 |
| 1 | -2.056587000 | 2.080965000  | -3.972099000 | 6  | 5.777413000  | -1.308089000 | 0.582062000  |
| 1 | -1.911057000 | 3.796909000  | -3.600314000 | 6  | 5.359577000  | -1.842544000 | -1.732390000 |
| 1 | -2.526426000 | 2.678825000  | -2.370900000 | 6  | 6.221887000  | -1.792233000 | -0.643243000 |
| 1 | -0.772377000 | 5.206024000  | -2.343885000 | 1  | 6.457844000  | -1.284064000 | 1.428585000  |
| 1 | -0.066547000 | 6.631730000  | -0.460203000 | 1  | 5.716090000  | -2.232182000 | -2.681350000 |
| 1 | 1.153408000  | 5.664655000  | 1.447113000  | 1  | 7.245252000  | -2.137698000 | -0.748231000 |
| 1 | 2.425398000  | 2.197685000  | 1.551204000  | 6  | 3.097252000  | -1.498695000 | -2.813756000 |
| 1 | 3.476937000  | 4.465809000  | 1.875061000  | 1  | 2.168557000  | -0.968861000 | -2.565339000 |
| 1 | 3.358114000  | 3.486999000  | 3.348879000  | 6  | 3.990931000  | -0.373280000 | 2.106724000  |
| 1 | 2.240199000  | 4.822526000  | 3.095512000  | 1  | 2.936025000  | -0.080078000 | 2.028141000  |
| 1 | 1.320884000  | 1.985152000  | 3.732862000  | 6  | 2.732166000  | -2.964029000 | -3.085327000 |
| 1 | 0.209203000  | 3.310176000  | 3.334560000  | 1  | 2.009112000  | -3.029985000 | -3.905145000 |
| 1 | 0.103776000  | 1.778272000  | 2.463576000  | 1  | 3.621331000  | -3.536238000 | -3.371092000 |
| 1 | 2.874814000  | 2.685460000  | -1.159388000 | 1  | 2.294813000  | -3.429436000 | -2.197228000 |
| 1 | 3.559499000  | 1.219206000  | -1.904137000 | 6  | 3.685855000  | -0.847371000 | -4.071066000 |
| 1 | 2.848712000  | -2.969897000 | 0.482003000  | 1  | 4.569451000  | -1.388886000 | -4.422443000 |
| 1 | 1.113100000  | -3.454474000 | 0.915968000  | 1  | 2.949299000  | -0.862392000 | -4.879773000 |
| 1 | -2.789632000 | -4.705353000 | -0.573404000 | 1  | 3.981248000  | 0.193078000  | -3.899324000 |
| 1 | -3.667628000 | -4.704130000 | 1.734482000  | 6  | 4.792187000  | 0.847471000  | 2.577906000  |
| 1 | -2.759061000 | -3.133018000 | 3.407099000  | 1  | 4.407881000  | 1.199284000  | 3.541140000  |
| 1 | -0.106356000 | -0.590637000 | 2.644460000  | 1  | 5.848252000  | 0.594541000  | 2.715972000  |
| 1 | 0.416610000  | -1.424539000 | 4.896441000  | 1  | 4.741322000  | 1.680847000  | 1.868177000  |
| 1 | -0.688229000 | -2.790837000 | 4.676911000  | 6  | 4.071680000  | -1.495004000 | 3.150835000  |
| 1 | 0.764481000  | -2.661702000 | 3.669414000  | 1  | 3.677246000  | -1.145688000 | 4.110149000  |
| 1 | -2.601197000 | -1.061956000 | 4.359062000  | 1  | 3.491311000  | -2.366735000 | 2.837555000  |
| 1 | -1.460646000 | 0.280320000  | 4.490268000  | 1  | 5.108437000  | -1.809400000 | 3.309173000  |
| 1 | -2.489783000 | 0.126493000  | 3.046340000  | 8  | -1.980080000 | 1.308248000  | 0.939049000  |
| 1 | -0.047612000 | -2.426576000 | -1.745608000 | 1  | -1.937171000 | 0.339712000  | -1.214206000 |
| 1 | -1.555231000 | -2.695812000 | -3.686464000 | 5  | -3.039441000 | 0.381971000  | -0.609421000 |
| 1 | -2.352317000 | -1.716299000 | -2.434131000 | 8  | -3.984200000 | 1.281049000  | -0.992551000 |
| 1 | -2.802874000 | -3.409534000 | -2.653233000 | 8  | -3.499972000 | -0.770523000 | -0.056102000 |
| 1 | 0.086658000  | -4.533807000 | -3.019551000 | 6  | -5.230090000 | 0.798740000  | -0.389610000 |

|                  |              |              |              |   |              |              |              |
|------------------|--------------|--------------|--------------|---|--------------|--------------|--------------|
| 6                | -4.946859000 | -0.732320000 | -0.199703000 | 6 | 4.924864000  | -1.531066000 | -2.151586000 |
| 6                | -5.567689000 | -1.352139000 | 1.040238000  | 1 | 5.989734000  | -1.438940000 | -1.965229000 |
| 6                | -5.276896000 | -1.564666000 | -1.434354000 | 6 | 4.447704000  | -2.499423000 | -3.034916000 |
| 6                | -5.410898000 | 1.526564000  | 0.937810000  | 1 | 5.145971000  | -3.158984000 | -3.540473000 |
| 6                | -6.370198000 | 1.123421000  | -1.338032000 | 6 | 3.080452000  | -2.624507000 | -3.269536000 |
| 1                | -6.491704000 | 2.207478000  | -1.408935000 | 1 | 2.712037000  | -3.379076000 | -3.956574000 |
| 1                | -6.182148000 | 0.732095000  | -2.339183000 | 6 | 2.183058000  | -1.773269000 | -2.630024000 |
| 1                | -7.306804000 | 0.698607000  | -0.962703000 | 1 | 1.114350000  | -1.852292000 | -2.810166000 |
| 1                | -5.413715000 | 2.605727000  | 0.761536000  | 6 | -2.761628000 | 0.242829000  | 1.391744000  |
| 1                | -4.602469000 | 1.283836000  | 1.634250000  | 6 | -3.492974000 | -0.804235000 | 1.978615000  |
| 1                | -6.361785000 | 1.252685000  | 1.403231000  | 6 | -4.725453000 | -0.494415000 | 2.564500000  |
| 1                | -5.195649000 | -0.880912000 | 1.952245000  | 1 | -5.310807000 | -1.289967000 | 3.017382000  |
| 1                | -5.305433000 | -2.412716000 | 1.077377000  | 6 | -5.203197000 | 0.807111000  | 2.591028000  |
| 1                | -6.658639000 | -1.263949000 | 1.009425000  | 1 | -6.163433000 | 1.024719000  | 3.047624000  |
| 1                | -6.357487000 | -1.655269000 | -1.576945000 | 6 | -4.437981000 | 1.839043000  | 2.055488000  |
| 1                | -4.854051000 | -2.564141000 | -1.297031000 | 1 | -4.807432000 | 2.858241000  | 2.106627000  |
| 1                | -4.838953000 | -1.127638000 | -2.337634000 | 6 | -3.207652000 | 1.581837000  | 1.454917000  |
| 6                | -2.307616000 | 2.653796000  | 1.267059000  | 6 | -2.976510000 | -2.230424000 | 2.062534000  |
| 1                | -2.776976000 | 2.667752000  | 2.254591000  | 1 | -2.012600000 | -2.273998000 | 1.547780000  |
| 1                | -1.418217000 | 3.288488000  | 1.281058000  | 6 | -3.912005000 | -3.226566000 | 1.369901000  |
| 1                | -3.010835000 | 3.035404000  | 0.521356000  | 1 | -4.068675000 | -2.963928000 | 0.318547000  |
| 7 (in gas phase) |              |              |              | 1 | -4.889326000 | -3.257356000 | 1.863147000  |
| 13               | 0.000065000  | -0.000002000 | 1.735970000  | 1 | -3.487219000 | -4.234651000 | 1.408868000  |
| 7                | -1.503315000 | -0.026509000 | 0.723473000  | 6 | -2.736466000 | -2.628835000 | 3.525294000  |
| 7                | -0.000043000 | 0.000342000  | -1.492475000 | 1 | -2.052389000 | -1.932544000 | 4.021974000  |
| 7                | 1.503372000  | 0.026570000  | 0.723376000  | 1 | -2.305699000 | -3.633895000 | 3.578326000  |
| 6                | -2.660126000 | 0.798486000  | -1.748640000 | 1 | -3.673167000 | -2.635778000 | 4.092051000  |
| 6                | -4.035557000 | 0.680619000  | -1.502654000 | 6 | -2.347390000 | 2.725232000  | 0.938558000  |
| 1                | -4.412601000 | -0.069359000 | -0.810706000 | 1 | -1.728095000 | 2.339102000  | 0.125161000  |
| 6                | -4.925127000 | 1.530919000  | -2.151461000 | 6 | -3.152809000 | 3.886965000  | 0.354311000  |
| 1                | -5.989982000 | 1.438711000  | -1.965055000 | 1 | -3.879251000 | 3.528637000  | -0.381138000 |
| 6                | -4.448078000 | 2.499275000  | -3.034854000 | 1 | -2.478304000 | 4.589205000  | -0.146189000 |
| 1                | -5.146418000 | 3.158752000  | -3.540417000 | 1 | -3.687959000 | 4.445292000  | 1.129120000  |
| 6                | -3.080843000 | 2.624461000  | -3.269508000 | 6 | -1.413285000 | 3.225940000  | 2.050342000  |
| 1                | -2.712496000 | 3.379030000  | -3.956584000 | 1 | -0.759573000 | 2.433457000  | 2.445700000  |
| 6                | -2.183358000 | 1.773344000  | -2.629961000 | 1 | -1.992916000 | 3.599532000  | 2.900581000  |
| 1                | -1.114661000 | 1.852485000  | -2.810110000 | 1 | -0.771235000 | 4.038395000  | 1.690796000  |
| 6                | 2.659930000  | -0.798429000 | -1.748749000 | 6 | 2.761620000  | -0.242872000 | 1.391730000  |
| 6                | 4.035380000  | -0.680681000 | -1.502770000 | 6 | 3.207551000  | -1.581921000 | 1.454825000  |
| 1                | 4.412512000  | 0.069284000  | -0.810856000 | 6 | 4.437772000  | -1.839277000 | 2.055545000  |





|   |              |              |              |    |              |              |              |
|---|--------------|--------------|--------------|----|--------------|--------------|--------------|
| 6 | 3.467038000  | 0.509303000  | 1.965305000  | 1  | -1.075272000 | 2.721589000  | 2.452950000  |
| 6 | 4.686501000  | 0.116271000  | 2.526218000  | 1  | -2.493875000 | 3.745941000  | 2.683437000  |
| 1 | 5.235517000  | 0.8222006000 | 3.143363000  | 1  | -1.205057000 | 4.269516000  | 1.588771000  |
| 6 | 5.202763000  | -1.152947000 | 2.313804000  | 6  | -3.346783000 | 3.731445000  | 0.009814000  |
| 1 | 6.151516000  | -1.437368000 | 2.757417000  | 1  | -3.965503000 | 3.244081000  | -0.748442000 |
| 6 | 4.492146000  | -2.064057000 | 1.541866000  | 1  | -2.697729000 | 4.457664000  | -0.490351000 |
| 1 | 4.890939000  | -3.063245000 | 1.393417000  | 1  | -4.004122000 | 4.290913000  | 0.683323000  |
| 6 | 3.274957000  | -1.723297000 | 0.952322000  | 6  | -3.023509000 | -2.306847000 | 1.793127000  |
| 6 | 2.952240000  | 1.906744000  | 2.271141000  | 1  | -2.012894000 | -2.321724000 | 1.378421000  |
| 1 | 1.964366000  | 2.016779000  | 1.816912000  | 6  | -3.894685000 | -3.230745000 | 0.933249000  |
| 6 | 3.859543000  | 2.983776000  | 1.663868000  | 1  | -3.493010000 | -4.249081000 | 0.941828000  |
| 1 | 3.951583000  | 2.866980000  | 0.578921000  | 1  | -3.936957000 | -2.892795000 | -0.107249000 |
| 1 | 4.863814000  | 2.936240000  | 2.098358000  | 1  | -4.918444000 | -3.269131000 | 1.320754000  |
| 1 | 3.452850000  | 3.980353000  | 1.863210000  | 6  | -2.945759000 | -2.838110000 | 3.231238000  |
| 6 | 2.790549000  | 2.127226000  | 3.780913000  | 1  | -2.396351000 | -2.157362000 | 3.889910000  |
| 1 | 2.156166000  | 1.360728000  | 4.238353000  | 1  | -2.446775000 | -3.811889000 | 3.248955000  |
| 1 | 2.335886000  | 3.104222000  | 3.972367000  | 1  | -3.943957000 | -2.968947000 | 3.660917000  |
| 1 | 3.757119000  | 2.105160000  | 4.293913000  | 1  | -0.018254000 | 0.726673000  | 2.984615000  |
| 6 | 2.530276000  | -2.780795000 | 0.151024000  | 15 | -1.441318000 | -0.217204000 | -1.116889000 |
| 1 | 1.749535000  | -2.284483000 | -0.432331000 | 6  | -1.762903000 | -1.943513000 | -1.565397000 |
| 6 | 3.432098000  | -3.521412000 | -0.842336000 | 6  | -1.039925000 | -2.943051000 | -0.902164000 |
| 1 | 4.016625000  | -2.828260000 | -1.451262000 | 6  | -2.642588000 | -2.295575000 | -2.592137000 |
| 1 | 2.818507000  | -4.134493000 | -1.510515000 | 6  | -1.215857000 | -4.278146000 | -1.239631000 |
| 1 | 4.126176000  | -4.194094000 | -0.327782000 | 1  | -0.342766000 | -2.680902000 | -0.108013000 |
| 6 | 1.859499000  | -3.793709000 | 1.089930000  | 6  | -2.818735000 | -3.637500000 | -2.927708000 |
| 1 | 1.135558000  | -3.324901000 | 1.762863000  | 1  | -3.192869000 | -1.530626000 | -3.130346000 |
| 1 | 2.610981000  | -4.292261000 | 1.711406000  | 6  | -2.113838000 | -4.626311000 | -2.249748000 |
| 1 | 1.344798000  | -4.566510000 | 0.508191000  | 1  | -0.663396000 | -5.048859000 | -0.711582000 |
| 6 | -2.800700000 | 0.196933000  | 1.208732000  | 1  | -3.509190000 | -3.906366000 | -3.720260000 |
| 6 | -3.287974000 | 1.522189000  | 1.277090000  | 1  | -2.258461000 | -5.670219000 | -2.508717000 |
| 6 | -4.530026000 | 1.741662000  | 1.870792000  | 15 | 1.443625000  | 0.500076000  | -1.048269000 |
| 1 | -4.919911000 | 2.753322000  | 1.928499000  | 6  | 1.780636000  | 2.282322000  | -1.119507000 |
| 6 | -5.279156000 | 0.690387000  | 2.386129000  | 6  | 2.679867000  | 2.840690000  | -2.031666000 |
| 1 | -6.248559000 | 0.880857000  | 2.835388000  | 6  | 1.043091000  | 3.124936000  | -0.278646000 |
| 6 | -4.774302000 | -0.599764000 | 2.338512000  | 6  | 2.861016000  | 4.222737000  | -2.074893000 |
| 1 | -5.352488000 | -1.417297000 | 2.760079000  | 1  | 3.240189000  | 2.206190000  | -2.710160000 |
| 6 | -3.528351000 | -0.874173000 | 1.764216000  | 6  | 1.222873000  | 4.500615000  | -0.324580000 |
| 6 | -2.491413000 | 2.713755000  | 0.770054000  | 1  | 0.327126000  | 2.706196000  | 0.426238000  |
| 1 | -1.737154000 | 2.348634000  | 0.067589000  | 6  | 2.141316000  | 5.050338000  | -1.220185000 |
| 6 | -1.769232000 | 3.398175000  | 1.939769000  | 1  | 3.566302000  | 4.649173000  | -2.780511000 |



|    |              |              |              |                             |              |              |              |
|----|--------------|--------------|--------------|-----------------------------|--------------|--------------|--------------|
| 1  | -3.981855000 | -4.319400000 | -0.227292000 | <b>7-TS2</b> (in gas phase) |              |              |              |
| 6  | -3.043452000 | 2.113104000  | -2.058089000 | 13                          | -0.277188000 | -0.616311000 | -0.617403000 |
| 1  | -2.028819000 | 2.182564000  | -1.657903000 | 7                           | -0.913530000 | 1.020421000  | -0.145897000 |
| 6  | -3.928715000 | 3.090126000  | -1.273883000 | 7                           | 1.589494000  | 1.698560000  | 0.556495000  |
| 1  | -3.547973000 | 4.111829000  | -1.371713000 | 7                           | 1.455887000  | -0.893837000 | -0.119388000 |
| 1  | -3.961076000 | 2.842474000  | -0.207968000 | 6                           | -0.429368000 | 3.514877000  | 1.184292000  |
| 1  | -4.954378000 | 3.074269000  | -1.658259000 | 6                           | -1.578779000 | 4.261451000  | 0.888756000  |
| 6  | -2.984205000 | 2.522263000  | -3.535614000 | 1                           | -2.155656000 | 4.056009000  | -0.010286000 |
| 1  | -2.391126000 | 1.816947000  | -4.124727000 | 6                           | -1.978093000 | 5.276415000  | 1.751255000  |
| 1  | -2.530112000 | 3.513037000  | -3.633135000 | 1                           | -2.866071000 | 5.857285000  | 1.525032000  |
| 1  | -3.984469000 | 2.570119000  | -3.977378000 | 6                           | -1.236971000 | 5.547005000  | 2.902678000  |
| 1  | -0.001607000 | -0.001188000 | -4.890202000 | 1                           | -1.549506000 | 6.344450000  | 3.569412000  |
| 15 | -1.445267000 | 0.353094000  | 1.051989000  | 6                           | -0.101704000 | 4.798202000  | 3.200606000  |
| 6  | -1.784902000 | 2.112288000  | 1.327989000  | 1                           | 0.470445000  | 5.008887000  | 4.098057000  |
| 6  | -1.074695000 | 3.047810000  | 0.565632000  | 6                           | 0.306809000  | 3.780769000  | 2.341230000  |
| 6  | -2.659537000 | 2.556376000  | 2.322844000  | 1                           | 1.197146000  | 3.195015000  | 2.552108000  |
| 6  | -1.256757000 | 4.408188000  | 0.774135000  | 6                           | 3.999933000  | 0.349054000  | 0.322892000  |
| 1  | -0.382771000 | 2.715296000  | -0.206040000 | 6                           | 4.846981000  | -0.749252000 | 0.525042000  |
| 6  | -2.843174000 | 3.923301000  | 2.528135000  | 1                           | 4.451552000  | -1.691859000 | 0.896663000  |
| 1  | -3.199963000 | 1.843746000  | 2.937366000  | 6                           | 6.204883000  | -0.628202000 | 0.251909000  |
| 6  | -2.149842000 | 4.846597000  | 1.752870000  | 1                           | 6.863526000  | -1.476222000 | 0.407194000  |
| 1  | -0.712429000 | 5.127817000  | 0.170732000  | 6                           | 6.717509000  | 0.581959000  | -0.218169000 |
| 1  | -3.529888000 | 4.262994000  | 3.296381000  | 1                           | 7.779313000  | 0.673710000  | -0.423721000 |
| 1  | -2.299606000 | 5.909689000  | 1.911485000  | 6                           | 5.873757000  | 1.669711000  | -0.426269000 |
| 15 | 1.445330000  | -0.352485000 | 1.051976000  | 1                           | 6.274934000  | 2.608134000  | -0.794626000 |
| 6  | 1.784902000  | -2.111591000 | 1.328580000  | 6                           | 4.511817000  | 1.557140000  | -0.155332000 |
| 6  | 2.659635000  | -2.555223000 | 2.323571000  | 1                           | 3.840248000  | 2.398277000  | -0.301771000 |
| 6  | 1.074739000  | -3.047486000 | 0.566648000  | 6                           | -2.341260000 | 1.249862000  | 0.002235000  |
| 6  | 2.843386000  | -3.922042000 | 2.529429000  | 6                           | -3.143593000 | 1.464812000  | -1.136381000 |
| 1  | 3.200002000  | -1.842295000 | 2.937794000  | 6                           | -4.510421000 | 1.685182000  | -0.951093000 |
| 6  | 1.256912000  | -4.407764000 | 0.775712000  | 1                           | -5.138318000 | 1.866334000  | -1.819399000 |
| 1  | 0.382776000  | -2.715366000 | -0.205148000 | 6                           | -5.081633000 | 1.664663000  | 0.313815000  |
| 6  | 2.150079000  | -4.845707000 | 1.754578000  | 1                           | -6.146687000 | 1.837018000  | 0.435659000  |
| 1  | 3.530156000  | -4.261377000 | 3.297783000  | 6                           | -4.282653000 | 1.416164000  | 1.422502000  |
| 1  | 0.712629000  | -5.127677000 | 0.172610000  | 1                           | -4.731730000 | 1.394757000  | 2.411837000  |
| 1  | 2.299946000  | -5.908724000 | 1.913606000  | 6                           | -2.906472000 | 1.212012000  | 1.296187000  |
| 6  | -0.001025000 | -0.000857000 | -3.798371000 | 6                           | -2.599905000 | 1.458056000  | -2.555211000 |
| 8  | -0.031683000 | -1.081226000 | -3.130605000 | 1                           | -1.546338000 | 1.176928000  | -2.516866000 |
| 8  | 0.030373000  | 1.079840000  | -3.131272000 | 6                           | -2.687087000 | 2.850120000  | -3.192757000 |
|    |              |              |              | 1                           | -2.136477000 | 3.596671000  | -2.609959000 |

|   |              |              |              |    |              |              |              |
|---|--------------|--------------|--------------|----|--------------|--------------|--------------|
| 1 | -3.729226000 | 3.179010000  | -3.270121000 | 1  | 2.993805000  | -4.552523000 | 2.250152000  |
| 1 | -2.262871000 | 2.833364000  | -4.201907000 | 6  | 0.397409000  | -4.710161000 | 1.260750000  |
| 6 | -3.309147000 | 0.413628000  | -3.425767000 | 1  | -0.283221000 | -4.670386000 | 0.407326000  |
| 1 | -3.244074000 | -0.576574000 | -2.966467000 | 1  | -0.202808000 | -4.723604000 | 2.175745000  |
| 1 | -2.843107000 | 0.374833000  | -4.415676000 | 1  | 0.949583000  | -5.654722000 | 1.217392000  |
| 1 | -4.366854000 | 0.661506000  | -3.567947000 | 1  | -0.501076000 | -2.960847000 | -3.379077000 |
| 6 | -2.097274000 | 0.967155000  | 2.561814000  | 15 | 2.260382000  | 0.268738000  | 0.779773000  |
| 1 | -1.033785000 | 1.017012000  | 2.308583000  | 6  | 2.246469000  | -0.163957000 | 2.542432000  |
| 6 | -2.362177000 | 2.028901000  | 3.637371000  | 6  | 1.069641000  | -0.650671000 | 3.121999000  |
| 1 | -2.307992000 | 3.040782000  | 3.231655000  | 6  | 3.374670000  | 0.038808000  | 3.343735000  |
| 1 | -1.622172000 | 1.936230000  | 4.439166000  | 6  | 1.030546000  | -0.962630000 | 4.475689000  |
| 1 | -3.352040000 | 1.896128000  | 4.086914000  | 1  | 0.183376000  | -0.807316000 | 2.511742000  |
| 6 | -2.389535000 | -0.417948000 | 3.154398000  | 6  | 3.330919000  | -0.269947000 | 4.701627000  |
| 1 | -2.166245000 | -1.242092000 | 2.467424000  | 1  | 4.290930000  | 0.428497000  | 2.911816000  |
| 1 | -3.447387000 | -0.499499000 | 3.426615000  | 6  | 2.165031000  | -0.778124000 | 5.265342000  |
| 1 | -1.804712000 | -0.564035000 | 4.068384000  | 1  | 0.123558000  | -1.366806000 | 4.913522000  |
| 6 | 2.132176000  | -2.047867000 | -0.694211000 | 1  | 4.212545000  | -0.118167000 | 5.315565000  |
| 6 | 2.793331000  | -1.913756000 | -1.937471000 | 1  | 2.137314000  | -1.031383000 | 6.320267000  |
| 6 | 3.381499000  | -3.049889000 | -2.497707000 | 15 | 0.195181000  | 2.270107000  | 0.043104000  |
| 1 | 3.892675000  | -2.962164000 | -3.452354000 | 6  | 0.440554000  | 3.118609000  | -1.542852000 |
| 6 | 3.336483000  | -4.281337000 | -1.858933000 | 6  | 0.469103000  | 4.512493000  | -1.639249000 |
| 1 | 3.807485000  | -5.148565000 | -2.310721000 | 6  | 0.673088000  | 2.345240000  | -2.687102000 |
| 6 | 2.681105000  | -4.396581000 | -0.642204000 | 6  | 0.697083000  | 5.122167000  | -2.872096000 |
| 1 | 2.639090000  | -5.361408000 | -0.145634000 | 1  | 0.311121000  | 5.126666000  | -0.758637000 |
| 6 | 2.058603000  | -3.298068000 | -0.043693000 | 6  | 0.897711000  | 2.954778000  | -3.914447000 |
| 6 | 2.917134000  | -0.603845000 | -2.704756000 | 1  | 0.665122000  | 1.257500000  | -2.633369000 |
| 1 | 2.533040000  | 0.208346000  | -2.078197000 | 6  | 0.902449000  | 4.346900000  | -4.008243000 |
| 6 | 2.110066000  | -0.630174000 | -4.011626000 | 1  | 0.710822000  | 6.204897000  | -2.940900000 |
| 1 | 1.037050000  | -0.744483000 | -3.838573000 | 1  | 1.057030000  | 2.346378000  | -4.798903000 |
| 1 | 2.442610000  | -1.457385000 | -4.648154000 | 1  | 1.069964000  | 4.824158000  | -4.968415000 |
| 1 | 2.277424000  | 0.298294000  | -4.568684000 | 6  | -0.681394000 | -2.586970000 | -2.364003000 |
| 6 | 4.380641000  | -0.277876000 | -3.036206000 | 8  | -0.553261000 | -1.292387000 | -2.231912000 |
| 1 | 5.031365000  | -0.390073000 | -2.167255000 | 8  | -0.984402000 | -3.335681000 | -1.445117000 |
| 1 | 4.459649000  | 0.751998000  | -3.399314000 | 1  | -1.223960000 | -1.708001000 | 0.439889000  |
| 1 | 4.756784000  | -0.935181000 | -3.827398000 | 5  | -2.205431000 | -2.345229000 | 0.016065000  |
| 6 | 1.351273000  | -3.508344000 | 1.285016000  | 8  | -2.669956000 | -3.346838000 | 0.793773000  |
| 1 | 0.753884000  | -2.617081000 | 1.493279000  | 8  | -3.099917000 | -1.758490000 | -0.822122000 |
| 6 | 2.369790000  | -3.668486000 | 2.422424000  | 6  | -4.110585000 | -3.396741000 | 0.536155000  |
| 1 | 1.855255000  | -3.797817000 | 3.380240000  | 6  | -4.243216000 | -2.672712000 | -0.849051000 |
| 1 | 3.028475000  | -2.798250000 | 2.512132000  | 6  | -4.059868000 | -3.612746000 | -2.036904000 |





|   |              |              |              |    |              |              |              |
|---|--------------|--------------|--------------|----|--------------|--------------|--------------|
| 6 | -1.791852000 | 5.460063000  | 1.412129000  | 6  | -2.114506000 | 2.392246000  | 3.685522000  |
| 1 | -2.678704000 | 6.034626000  | 1.166145000  | 1  | -2.107639000 | 3.378727000  | 3.215442000  |
| 6 | -0.998160000 | 5.825364000  | 2.500199000  | 1  | -1.315333000 | 2.359645000  | 4.433271000  |
| 1 | -1.267992000 | 6.689913000  | 3.098481000  | 1  | -3.064916000 | 2.272972000  | 4.216403000  |
| 6 | 0.136251000  | 5.085017000  | 2.821573000  | 6  | -2.123940000 | -0.086437000 | 3.326814000  |
| 1 | 0.750811000  | 5.369210000  | 3.669412000  | 1  | -1.852473000 | -0.923357000 | 2.672116000  |
| 6 | 0.488249000  | 3.979144000  | 2.050986000  | 1  | -3.175744000 | -0.214707000 | 3.605371000  |
| 1 | 1.374460000  | 3.395372000  | 2.283050000  | 1  | -1.525850000 | -0.154246000 | 4.241616000  |
| 6 | 4.017547000  | 0.290469000  | 0.110762000  | 6  | 2.009569000  | -2.136687000 | -0.570774000 |
| 6 | 4.867826000  | -0.797998000 | 0.349375000  | 6  | 2.581939000  | -2.142964000 | -1.868661000 |
| 1 | 4.490731000  | -1.697762000 | 0.830577000  | 6  | 3.050197000  | -3.356066000 | -2.379632000 |
| 6 | 6.205624000  | -0.720195000 | -0.021834000 | 1  | 3.496711000  | -3.372328000 | -3.370170000 |
| 1 | 6.867418000  | -1.559401000 | 0.165152000  | 6  | 2.967419000  | -4.535485000 | -1.650860000 |
| 6 | 6.693645000  | 0.436196000  | -0.632451000 | 1  | 3.341601000  | -5.464370000 | -2.069368000 |
| 1 | 7.739848000  | 0.495642000  | -0.915357000 | 6  | 2.404627000  | -4.515503000 | -0.383996000 |
| 6 | 5.845208000  | 1.511749000  | -0.881440000 | 1  | 2.339600000  | -5.436409000 | 0.187687000  |
| 1 | 6.227617000  | 2.407967000  | -1.358786000 | 6  | 1.912548000  | -3.332622000 | 0.176517000  |
| 6 | 4.504745000  | 1.443766000  | -0.507116000 | 6  | 2.736123000  | -0.907593000 | -2.748240000 |
| 1 | 3.832631000  | 2.280365000  | -0.677453000 | 1  | 2.406359000  | -0.031118000 | -2.181406000 |
| 6 | -2.314710000 | 1.332510000  | 0.106747000  | 6  | 1.899997000  | -0.996180000 | -4.034927000 |
| 6 | -3.172566000 | 1.522165000  | -0.996667000 | 1  | 0.824108000  | -0.994897000 | -3.844408000 |
| 6 | -4.505767000 | 1.858439000  | -0.746638000 | 1  | 2.152147000  | -1.902349000 | -4.597056000 |
| 1 | -5.173908000 | 2.026919000  | -1.586967000 | 1  | 2.131059000  | -0.142342000 | -4.680539000 |
| 6 | -4.993854000 | 1.969755000  | 0.547778000  | 6  | 4.202645000  | -0.687337000 | -3.150134000 |
| 1 | -6.034989000 | 2.225222000  | 0.719137000  | 1  | 4.878314000  | -0.760990000 | -2.297467000 |
| 6 | -4.143372000 | 1.747685000  | 1.623661000  | 1  | 4.319381000  | 0.302653000  | -3.602549000 |
| 1 | -4.527791000 | 1.835382000  | 2.635771000  | 1  | 4.515862000  | -1.428486000 | -3.893564000 |
| 6 | -2.793739000 | 1.443914000  | 1.431316000  | 6  | 1.326614000  | -3.393157000 | 1.577968000  |
| 6 | -2.712214000 | 1.417020000  | -2.441716000 | 1  | 0.806348000  | -2.452073000 | 1.768359000  |
| 1 | -1.686253000 | 1.043496000  | -2.442350000 | 6  | 2.443142000  | -3.531492000 | 2.622319000  |
| 6 | -2.717589000 | 2.793117000  | -3.120882000 | 1  | 2.019661000  | -3.548994000 | 3.631835000  |
| 1 | -2.088251000 | 3.515033000  | -2.590313000 | 1  | 3.154747000  | -2.700766000 | 2.574334000  |
| 1 | -3.735199000 | 3.196858000  | -3.165789000 | 1  | 2.995901000  | -4.464992000 | 2.468588000  |
| 1 | -2.340984000 | 2.712703000  | -4.145796000 | 6  | 0.307384000  | -4.526798000 | 1.744027000  |
| 6 | -3.556253000 | 0.424186000  | -3.250020000 | 1  | -0.461991000 | -4.511978000 | 0.967931000  |
| 1 | -3.535807000 | -0.567506000 | -2.791978000 | 1  | -0.193209000 | -4.433473000 | 2.712879000  |
| 1 | -3.164074000 | 0.351504000  | -4.269922000 | 1  | 0.792372000  | -5.508161000 | 1.722583000  |
| 1 | -4.598853000 | 0.752653000  | -3.325163000 | 1  | -0.079793000 | -3.149853000 | -2.988653000 |
| 6 | -1.904700000 | 1.275032000  | 2.656126000  | 15 | 2.317530000  | 0.276331000  | 0.705196000  |
| 1 | -0.859911000 | 1.325996000  | 2.335500000  | 6  | 2.448171000  | -0.034780000 | 2.491103000  |





|   |              |              |              |    |              |              |              |
|---|--------------|--------------|--------------|----|--------------|--------------|--------------|
| 1 | -5.575540000 | 3.344392000  | 0.465201000  | 1  | 4.756979000  | -1.454107000 | -2.269674000 |
| 6 | -3.839009000 | 2.559170000  | 1.462803000  | 1  | 4.367302000  | -0.334067000 | -3.588731000 |
| 1 | -4.232558000 | 2.762853000  | 2.454466000  | 1  | 4.285527000  | -2.078629000 | -3.856404000 |
| 6 | -2.569223000 | 1.993116000  | 1.338382000  | 6  | 0.817984000  | -3.458357000 | 1.619360000  |
| 6 | -2.390318000 | 1.731179000  | -2.519152000 | 1  | 0.499777000  | -2.435263000 | 1.816057000  |
| 1 | -1.423812000 | 1.227078000  | -2.463878000 | 6  | 1.884488000  | -3.818950000 | 2.661623000  |
| 6 | -2.210098000 | 3.022912000  | -3.326181000 | 1  | 1.465028000  | -3.755196000 | 3.671083000  |
| 1 | -1.499140000 | 3.704886000  | -2.848168000 | 1  | 2.739869000  | -3.136449000 | 2.614997000  |
| 1 | -3.164763000 | 3.548857000  | -3.436724000 | 1  | 2.251821000  | -4.839709000 | 2.508374000  |
| 1 | -1.834362000 | 2.795520000  | -4.329021000 | 6  | -0.414638000 | -4.355192000 | 1.777447000  |
| 6 | -3.360515000 | 0.783085000  | -3.235289000 | 1  | -1.178532000 | -4.136270000 | 1.024237000  |
| 1 | -3.481999000 | -0.149042000 | -2.676770000 | 1  | -0.860409000 | -4.198776000 | 2.765581000  |
| 1 | -2.982987000 | 0.547310000  | -4.236156000 | 1  | -0.159994000 | -5.417047000 | 1.698009000  |
| 1 | -4.348158000 | 1.241603000  | -3.358194000 | 1  | -0.310040000 | -2.951204000 | -3.032635000 |
| 6 | -1.797053000 | 1.666016000  | 2.607445000  | 15 | 2.344274000  | -0.000255000 | 0.719954000  |
| 1 | -0.748337000 | 1.504639000  | 2.341098000  | 6  | 2.375655000  | -0.305067000 | 2.514454000  |
| 6 | -1.833296000 | 2.802634000  | 3.635303000  | 6  | 1.158324000  | -0.456303000 | 3.190420000  |
| 1 | -1.603763000 | 3.767524000  | 3.176998000  | 6  | 3.567615000  | -0.315754000 | 3.244064000  |
| 1 | -1.097534000 | 2.610610000  | 4.423102000  | 6  | 1.134240000  | -0.644623000 | 4.566578000  |
| 1 | -2.814524000 | 2.876641000  | 4.116113000  | 1  | 0.217778000  | -0.441936000 | 2.641917000  |
| 6 | -2.332149000 | 0.375441000  | 3.243490000  | 6  | 3.541631000  | -0.504625000 | 4.625114000  |
| 1 | -2.211082000 | -0.484782000 | 2.577386000  | 1  | 4.519418000  | -0.179882000 | 2.740686000  |
| 1 | -3.398970000 | 0.477142000  | 3.475027000  | 6  | 2.329583000  | -0.675776000 | 5.285128000  |
| 1 | -1.806639000 | 0.165466000  | 4.181846000  | 1  | 0.186526000  | -0.777531000 | 5.078806000  |
| 6 | 1.690732000  | -2.346585000 | -0.537683000 | 1  | 4.472547000  | -0.518612000 | 5.182419000  |
| 6 | 2.267423000  | -2.457262000 | -1.828054000 | 1  | 2.312536000  | -0.830118000 | 6.359248000  |
| 6 | 2.533604000  | -3.732963000 | -2.332049000 | 15 | 0.586077000  | 2.229214000  | -0.086422000 |
| 1 | 2.981305000  | -3.827327000 | -3.317897000 | 6  | 0.907644000  | 2.871521000  | -1.753942000 |
| 6 | 2.246674000  | -4.879453000 | -1.601718000 | 6  | 1.192540000  | 4.219070000  | -1.989878000 |
| 1 | 2.463134000  | -5.859752000 | -2.014178000 | 6  | 0.939797000  | 1.963125000  | -2.817993000 |
| 6 | 1.687507000  | -4.758915000 | -0.338568000 | 6  | 1.472809000  | 4.655799000  | -3.283825000 |
| 1 | 1.470108000  | -5.653230000 | 0.238332000  | 1  | 1.191987000  | 4.931487000  | -1.171202000 |
| 6 | 1.398225000  | -3.507430000 | 0.215230000  | 6  | 1.215463000  | 2.401591000  | -4.106900000 |
| 6 | 2.619623000  | -1.263905000 | -2.706566000 | 1  | 0.727910000  | 0.911440000  | -2.636820000 |
| 1 | 2.446484000  | -0.347461000 | -2.134905000 | 6  | 1.475212000  | 3.752234000  | -4.341264000 |
| 6 | 1.755790000  | -1.209456000 | -3.975859000 | 1  | 1.685238000  | 5.704756000  | -3.462598000 |
| 1 | 0.701347000  | -1.010515000 | -3.760438000 | 1  | 1.213290000  | 1.696704000  | -4.932188000 |
| 1 | 1.826734000  | -2.150052000 | -4.534443000 | 1  | 1.681838000  | 4.097019000  | -5.349411000 |
| 1 | 2.117608000  | -0.414466000 | -4.635805000 | 6  | -0.930859000 | -2.535125000 | -2.234635000 |
| 6 | 4.097317000  | -1.287170000 | -3.122711000 | 8  | -0.796254000 | -1.351662000 | -1.895151000 |

|                             |              |              |              |   |              |              |              |
|-----------------------------|--------------|--------------|--------------|---|--------------|--------------|--------------|
| 8                           | -1.763276000 | -3.378369000 | -1.722215000 | 6 | 3.542957000  | -2.180715000 | 0.143088000  |
| 1                           | -1.452230000 | -1.539789000 | 0.758298000  | 6 | 3.505458000  | -3.577020000 | 0.260674000  |
| 5                           | -2.916030000 | -3.039657000 | -0.956376000 | 1 | 2.625966000  | -4.074306000 | 0.664441000  |
| 8                           | -3.523976000 | -3.981301000 | -0.218480000 | 6 | 4.605927000  | -4.330108000 | -0.134495000 |
| 8                           | -3.500580000 | -1.826945000 | -1.024977000 | 1 | 4.581765000  | -5.410733000 | -0.040414000 |
| 6                           | -4.584345000 | -3.283054000 | 0.507485000  | 6 | 5.736224000  | -3.695692000 | -0.651291000 |
| 6                           | -4.790130000 | -1.975479000 | -0.348808000 | 1 | 6.594706000  | -4.286726000 | -0.954289000 |
| 6                           | -5.829815000 | -2.131411000 | -1.452371000 | 6 | 5.765983000  | -2.309812000 | -0.784015000 |
| 6                           | -5.036139000 | -0.715299000 | 0.458716000  | 1 | 6.644609000  | -1.820217000 | -1.190904000 |
| 6                           | -5.798962000 | -4.192436000 | 0.571161000  | 6 | 4.670579000  | -1.547568000 | -0.384597000 |
| 6                           | -4.039548000 | -3.017222000 | 1.905756000  | 1 | 4.682380000  | -0.464165000 | -0.467441000 |
| 1                           | -3.783381000 | -3.972872000 | 2.371002000  | 6 | -0.713959000 | 2.606799000  | -0.031599000 |
| 1                           | -3.135257000 | -2.403084000 | 1.864862000  | 6 | -1.113947000 | 3.310695000  | -1.185534000 |
| 1                           | -4.782667000 | -2.511862000 | 2.528984000  | 6 | -2.001593000 | 4.380702000  | -1.032442000 |
| 1                           | -5.558797000 | -5.077978000 | 1.164551000  | 1 | -2.308678000 | 4.939359000  | -1.912090000 |
| 1                           | -6.112967000 | -4.519146000 | -0.421403000 | 6 | -2.499349000 | 4.736541000  | 0.211618000  |
| 1                           | -6.633760000 | -3.673072000 | 1.053152000  | 1 | -3.187205000 | 5.570809000  | 0.306358000  |
| 1                           | -5.634805000 | -3.018907000 | -2.062498000 | 6 | -2.121119000 | 4.011997000  | 1.335196000  |
| 1                           | -5.790959000 | -1.252258000 | -2.101193000 | 1 | -2.522478000 | 4.284152000  | 2.307076000  |
| 1                           | -6.837483000 | -2.210430000 | -1.035750000 | 6 | -1.229347000 | 2.944122000  | 1.241069000  |
| 1                           | -5.959939000 | -0.806506000 | 1.039666000  | 6 | -0.628284000 | 2.972305000  | -2.584836000 |
| 1                           | -5.135313000 | 0.137650000  | -0.218578000 | 1 | -0.042253000 | 2.053194000  | -2.526146000 |
| 1                           | -4.205611000 | -0.508704000 | 1.138437000  | 6 | 0.274470000  | 4.081160000  | -3.140685000 |
|                             |              |              |              | 1 | 1.138014000  | 4.267463000  | -2.493782000 |
|                             |              |              |              | 1 | -0.283218000 | 5.018857000  | -3.241594000 |
|                             |              |              |              | 1 | 0.650399000  | 3.804503000  | -4.131097000 |
|                             |              |              |              | 6 | -1.796700000 | 2.708436000  | -3.542439000 |
|                             |              |              |              | 1 | -2.467222000 | 1.940800000  | -3.149379000 |
|                             |              |              |              | 1 | -1.413353000 | 2.370696000  | -4.510616000 |
|                             |              |              |              | 1 | -2.382296000 | 3.616740000  | -3.718505000 |
|                             |              |              |              | 6 | -0.875160000 | 2.173228000  | 2.503030000  |
|                             |              |              |              | 1 | 0.018544000  | 1.577350000  | 2.299317000  |
|                             |              |              |              | 6 | -0.540233000 | 3.086309000  | 3.686676000  |
|                             |              |              |              | 1 | 0.184564000  | 3.854277000  | 3.404866000  |
|                             |              |              |              | 1 | -0.113931000 | 2.492983000  | 4.502541000  |
|                             |              |              |              | 1 | -1.433967000 | 3.584774000  | 4.076475000  |
|                             |              |              |              | 6 | -2.015154000 | 1.216953000  | 2.883283000  |
|                             |              |              |              | 1 | -2.223803000 | 0.489962000  | 2.090093000  |
|                             |              |              |              | 1 | -2.936181000 | 1.780710000  | 3.069259000  |
|                             |              |              |              | 1 | -1.769452000 | 0.667779000  | 3.799622000  |
| <b>7-TS4 (in gas phase)</b> |              |              |              |   |              |              |              |
| 13                          | -0.434628000 | -0.163801000 | -0.488066000 |   |              |              |              |
| 7                           | 0.223375000  | 1.501471000  | -0.131184000 |   |              |              |              |
| 7                           | 2.544473000  | 0.379424000  | 0.633481000  |   |              |              |              |
| 7                           | 0.796046000  | -1.480207000 | -0.164189000 |   |              |              |              |
| 6                           | 2.133475000  | 3.041133000  | 1.327050000  |   |              |              |              |
| 6                           | 1.744628000  | 4.360951000  | 1.058660000  |   |              |              |              |
| 1                           | 1.233583000  | 4.609508000  | 0.130909000  |   |              |              |              |
| 6                           | 2.020707000  | 5.360756000  | 1.985195000  |   |              |              |              |
| 1                           | 1.722726000  | 6.383324000  | 1.778586000  |   |              |              |              |
| 6                           | 2.679732000  | 5.048219000  | 3.174781000  |   |              |              |              |
| 1                           | 2.898636000  | 5.833008000  | 3.892010000  |   |              |              |              |
| 6                           | 3.054826000  | 3.735012000  | 3.446424000  |   |              |              |              |
| 1                           | 3.564258000  | 3.494216000  | 4.373678000  |   |              |              |              |
| 6                           | 2.783914000  | 2.727777000  | 2.523188000  |   |              |              |              |
| 1                           | 3.079942000  | 1.699932000  | 2.713845000  |   |              |              |              |

|    |              |              |              |    |              |              |              |
|----|--------------|--------------|--------------|----|--------------|--------------|--------------|
| 6  | 0.500633000  | -2.785488000 | -0.721761000 | 1  | 3.396466000  | -3.140034000 | 5.123622000  |
| 6  | 1.036055000  | -3.122711000 | -1.986210000 | 1  | 1.364584000  | -2.276266000 | 6.249889000  |
| 6  | 0.718832000  | -4.368246000 | -2.528791000 | 15 | 1.863531000  | 1.726088000  | 0.123803000  |
| 1  | 1.123609000  | -4.640801000 | -3.499254000 | 6  | 2.679601000  | 2.251464000  | -1.408156000 |
| 6  | -0.103449000 | -5.263042000 | -1.855826000 | 6  | 3.601689000  | 3.300387000  | -1.439170000 |
| 1  | -0.332411000 | -6.229287000 | -2.294030000 | 6  | 2.432616000  | 1.514000000  | -2.572611000 |
| 6  | -0.635155000 | -4.911798000 | -0.623941000 | 6  | 4.245251000  | 3.626018000  | -2.632444000 |
| 1  | -1.280093000 | -5.611795000 | -0.099851000 | 1  | 3.818651000  | 3.867139000  | -0.539378000 |
| 6  | -0.355063000 | -3.674069000 | -0.035874000 | 6  | 3.076697000  | 1.838847000  | -3.758996000 |
| 6  | 1.915640000  | -2.180285000 | -2.793717000 | 1  | 1.721462000  | 0.689831000  | -2.559306000 |
| 1  | 2.228373000  | -1.360686000 | -2.140826000 | 6  | 3.979436000  | 2.902671000  | -3.790210000 |
| 6  | 1.134507000  | -1.583981000 | -3.973683000 | 1  | 4.954128000  | 4.447214000  | -2.653467000 |
| 1  | 0.255850000  | -1.020045000 | -3.648236000 | 1  | 2.869674000  | 1.272011000  | -4.661234000 |
| 1  | 0.789504000  | -2.380520000 | -4.642084000 | 1  | 4.477090000  | 3.163040000  | -4.718881000 |
| 1  | 1.782350000  | -0.921029000 | -4.558522000 | 6  | -2.426532000 | -0.681573000 | -1.530490000 |
| 6  | 3.190228000  | -2.859049000 | -3.307148000 | 8  | -1.310524000 | -0.330449000 | -2.075695000 |
| 1  | 3.717375000  | -3.385360000 | -2.508173000 | 8  | -3.444481000 | 0.145087000  | -1.614935000 |
| 1  | 3.865083000  | -2.106447000 | -3.728178000 | 1  | -1.946549000 | -0.542143000 | 0.129434000  |
| 1  | 2.966427000  | -3.578950000 | -4.101514000 | 5  | -4.665106000 | -0.224630000 | -1.023493000 |
| 6  | -0.958167000 | -3.366470000 | 1.325830000  | 8  | -4.812852000 | -1.422872000 | -0.403029000 |
| 1  | -0.733061000 | -2.326243000 | 1.568406000  | 8  | -5.733867000 | 0.591757000  | -1.023364000 |
| 6  | -0.328777000 | -4.249020000 | 2.411705000  | 6  | -6.077827000 | -1.317144000 | 0.321005000  |
| 1  | -0.721957000 | -3.980960000 | 3.397803000  | 6  | -6.832908000 | -0.217794000 | -0.504666000 |
| 1  | 0.759452000  | -4.134208000 | 2.442999000  | 6  | -7.566841000 | -0.782562000 | -1.716072000 |
| 1  | -0.554295000 | -5.305759000 | 2.230672000  | 6  | -7.746870000 | 0.674464000  | 0.315226000  |
| 6  | -2.484569000 | -3.516300000 | 1.340729000  | 6  | -6.744049000 | -2.679950000 | 0.337204000  |
| 1  | -2.972909000 | -2.859106000 | 0.613702000  | 6  | -5.723922000 | -0.863688000 | 1.733619000  |
| 1  | -2.868272000 | -3.258907000 | 2.334259000  | 1  | -5.022800000 | -1.580423000 | 2.169887000  |
| 1  | -2.792360000 | -4.545203000 | 1.127414000  | 1  | -5.248885000 | 0.122951000  | 1.725109000  |
| 1  | -2.664904000 | -1.740240000 | -1.384575000 | 1  | -6.613647000 | -0.816017000 | 2.367279000  |
| 15 | 2.173940000  | -1.165271000 | 0.725784000  | 1  | -6.137112000 | -3.376332000 | 0.922539000  |
| 6  | 1.932300000  | -1.595249000 | 2.474270000  | 1  | -6.857226000 | -3.083580000 | -0.670372000 |
| 6  | 0.798267000  | -1.090583000 | 3.122652000  | 1  | -7.732084000 | -2.612066000 | 0.803449000  |
| 6  | 2.874036000  | -2.322645000 | 3.206008000  | 1  | -6.917315000 | -1.437806000 | -2.305289000 |
| 6  | 0.593383000  | -1.332649000 | 4.474354000  | 1  | -7.887469000 | 0.045489000  | -2.352664000 |
| 1  | 0.062544000  | -0.513122000 | 2.565780000  | 1  | -8.450188000 | -1.350684000 | -1.412074000 |
| 6  | 2.664638000  | -2.568060000 | 4.562728000  | 1  | -8.530184000 | 0.076916000  | 0.792575000  |
| 1  | 3.770754000  | -2.699892000 | 2.725249000  | 1  | -8.226377000 | 1.406059000  | -0.339782000 |
| 6  | 1.525950000  | -2.080452000 | 5.194675000  | 1  | -7.194165000 | 1.214331000  | 1.085997000  |
| 1  | -0.292976000 | -0.945387000 | 4.967314000  |    |              |              |              |

|                      |              |              |              |              |              |              |              |
|----------------------|--------------|--------------|--------------|--------------|--------------|--------------|--------------|
| 7-IM4 (in gas phase) |              |              | 1            | -1.512196000 | 3.698528000  | -3.163427000 |              |
| 1                    | -0.853460000 | -3.258017000 | -1.937453000 | 1            | -3.182564000 | 3.391827000  | -3.677335000 |
| 13                   | -0.243563000 | -0.604894000 | -0.800479000 | 1            | -1.835007000 | 2.685581000  | -4.580060000 |
| 7                    | -0.546131000 | 1.123546000  | -0.309911000 | 6            | -3.129337000 | 0.611058000  | -3.295269000 |
| 7                    | 2.106156000  | 1.342257000  | 0.049201000  | 1            | -3.169366000 | -0.265717000 | -2.637330000 |
| 7                    | 1.324948000  | -1.216362000 | -0.057329000 | 1            | -2.753277000 | 0.290629000  | -4.271761000 |
| 6                    | 0.476463000  | 3.485531000  | 0.926659000  | 1            | -4.155736000 | 0.973975000  | -3.420730000 |
| 6                    | -0.545666000 | 4.428476000  | 0.744288000  | 6            | -1.628080000 | 1.349153000  | 2.393433000  |
| 1                    | -1.212359000 | 4.361946000  | -0.112742000 | 1            | -0.571477000 | 1.256475000  | 2.129323000  |
| 6                    | -0.702690000 | 5.459937000  | 1.664228000  | 6            | -1.711690000 | 2.328055000  | 3.567386000  |
| 1                    | -1.488828000 | 6.193789000  | 1.520286000  | 1            | -1.488879000 | 3.350662000  | 3.251438000  |
| 6                    | 0.145213000  | 5.547274000  | 2.768809000  | 1            | -0.985226000 | 2.039033000  | 4.334522000  |
| 1                    | 0.019892000  | 6.355652000  | 3.482285000  | 1            | -2.702722000 | 2.319631000  | 4.033920000  |
| 6                    | 1.146958000  | 4.599645000  | 2.961262000  | 6            | -2.130398000 | -0.035569000 | 2.825275000  |
| 1                    | 1.801769000  | 4.664383000  | 3.824010000  | 1            | -1.908004000 | -0.802647000 | 2.073637000  |
| 6                    | 1.318246000  | 3.570310000  | 2.039062000  | 1            | -3.217443000 | -0.025812000 | 2.956201000  |
| 1                    | 2.107899000  | 2.835963000  | 2.171502000  | 1            | -1.671072000 | -0.330472000 | 3.774384000  |
| 6                    | 4.098303000  | -0.544074000 | 0.337195000  | 6            | 1.678582000  | -2.545543000 | -0.525480000 |
| 6                    | 4.613821000  | -1.752920000 | 0.819119000  | 6            | 2.423606000  | -2.713962000 | -1.716874000 |
| 1                    | 3.959875000  | -2.482085000 | 1.292268000  | 6            | 2.664455000  | -4.016747000 | -2.160193000 |
| 6                    | 5.972721000  | -2.018733000 | 0.692578000  | 1            | 3.239439000  | -4.162658000 | -3.070169000 |
| 1                    | 6.376358000  | -2.956484000 | 1.059687000  | 6            | 2.182660000  | -5.124196000 | -1.476465000 |
| 6                    | 6.814719000  | -1.076265000 | 0.100746000  | 1            | 2.388710000  | -6.124753000 | -1.843035000 |
| 1                    | 7.876527000  | -1.283064000 | 0.012059000  | 6            | 1.422829000  | -4.942009000 | -0.330046000 |
| 6                    | 6.300033000  | 0.126980000  | -0.375283000 | 1            | 1.032898000  | -5.807478000 | 0.197415000  |
| 1                    | 6.958299000  | 0.856702000  | -0.835363000 | 6            | 1.145035000  | -3.662062000 | 0.155725000  |
| 6                    | 4.938112000  | 0.397262000  | -0.260415000 | 6            | 2.974553000  | -1.573544000 | -2.565368000 |
| 1                    | 4.517381000  | 1.331419000  | -0.621457000 | 1            | 2.786156000  | -0.623292000 | -2.052514000 |
| 6                    | -1.885243000 | 1.652357000  | -0.144613000 | 6            | 2.297566000  | -1.504155000 | -3.943657000 |
| 6                    | -2.660667000 | 1.990816000  | -1.269913000 | 1            | 1.218680000  | -1.364175000 | -3.864940000 |
| 6                    | -3.920632000 | 2.560228000  | -1.060282000 | 1            | 2.482713000  | -2.425384000 | -4.506934000 |
| 1                    | -4.525751000 | 2.836563000  | -1.920045000 | 1            | 2.728124000  | -0.676909000 | -4.519816000 |
| 6                    | -4.413730000 | 2.765814000  | 0.220981000  | 6            | 4.490607000  | -1.712718000 | -2.772424000 |
| 1                    | -5.390390000 | 3.218723000  | 0.364070000  | 1            | 5.020273000  | -1.919154000 | -1.840839000 |
| 6                    | -3.657657000 | 2.373194000  | 1.319765000  | 1            | 4.895810000  | -0.793353000 | -3.206931000 |
| 1                    | -4.056093000 | 2.513581000  | 2.320511000  | 1            | 4.708181000  | -2.527789000 | -3.470983000 |
| 6                    | -2.390164000 | 1.813193000  | 1.163416000  | 6            | 0.297783000  | -3.523424000 | 1.409594000  |
| 6                    | -2.223899000 | 1.692654000  | -2.693555000 | 1            | -0.053802000 | -2.489648000 | 1.458850000  |
| 1                    | -1.213522000 | 1.283122000  | -2.669345000 | 6            | 1.143514000  | -3.797983000 | 2.659378000  |
| 6                    | -2.188671000 | 2.942938000  | -3.576669000 | 1            | 0.554626000  | -3.648464000 | 3.571123000  |



|   |              |              |              |    |              |              |              |
|---|--------------|--------------|--------------|----|--------------|--------------|--------------|
| 6 | 6.223016000  | 0.757830000  | -0.275648000 | 1  | 1.592821000  | -5.668109000 | -0.204995000 |
| 1 | 6.794258000  | 1.597575000  | -0.657653000 | 6  | 1.517965000  | -3.526032000 | -0.063058000 |
| 6 | 4.846024000  | 0.878739000  | -0.100013000 | 6  | 3.073180000  | -1.061331000 | -2.637994000 |
| 1 | 4.329171000  | 1.805285000  | -0.333427000 | 1  | 2.816201000  | -0.186226000 | -2.031495000 |
| 6 | -2.035238000 | 1.535847000  | -0.108055000 | 6  | 2.410960000  | -0.898301000 | -4.014866000 |
| 6 | -2.763630000 | 1.837759000  | -1.273558000 | 1  | 1.327659000  | -0.780821000 | -3.951812000 |
| 6 | -4.082946000 | 2.280250000  | -1.138103000 | 1  | 2.621729000  | -1.765250000 | -4.650425000 |
| 1 | -4.653680000 | 2.523834000  | -2.030797000 | 1  | 2.828215000  | -0.017905000 | -4.516223000 |
| 6 | -4.676271000 | 2.401718000  | 0.110301000  | 6  | 4.596795000  | -1.069718000 | -2.837234000 |
| 1 | -5.700145000 | 2.753305000  | 0.196997000  | 1  | 5.131124000  | -1.311785000 | -1.917480000 |
| 6 | -3.955942000 | 2.059566000  | 1.248734000  | 1  | 4.934043000  | -0.089134000 | -3.187845000 |
| 1 | -4.430917000 | 2.133085000  | 2.222787000  | 1  | 4.881285000  | -1.806743000 | -3.596096000 |
| 6 | -2.635388000 | 1.620904000  | 1.165955000  | 6  | 0.754808000  | -3.573154000 | 1.250970000  |
| 6 | -2.208830000 | 1.630138000  | -2.671335000 | 1  | 0.344616000  | -2.578948000 | 1.434849000  |
| 1 | -1.171498000 | 1.306386000  | -2.585537000 | 6  | 1.702928000  | -3.911510000 | 2.409361000  |
| 6 | -2.214230000 | 2.914164000  | -3.505505000 | 1  | 1.158914000  | -3.921770000 | 3.359667000  |
| 1 | -1.621771000 | 3.698803000  | -3.022485000 | 1  | 2.511125000  | -3.177472000 | 2.498644000  |
| 1 | -3.231001000 | 3.293963000  | -3.651157000 | 1  | 2.152390000  | -4.899802000 | 2.261699000  |
| 1 | -1.782393000 | 2.725532000  | -4.493675000 | 6  | -0.427400000 | -4.548930000 | 1.219480000  |
| 6 | -2.977668000 | 0.503050000  | -3.371921000 | 1  | -1.094534000 | -4.351922000 | 0.374501000  |
| 1 | -3.003862000 | -0.393354000 | -2.739918000 | 1  | -1.010343000 | -4.447489000 | 2.141306000  |
| 1 | -2.505704000 | 0.247410000  | -4.326383000 | 1  | -0.095387000 | -5.590579000 | 1.162202000  |
| 1 | -4.016786000 | 0.789648000  | -3.568578000 | 1  | -1.859943000 | -2.445683000 | -2.847380000 |
| 6 | -1.921872000 | 1.188975000  | 2.435407000  | 15 | 2.365230000  | 0.007214000  | 0.752798000  |
| 1 | -0.845873000 | 1.182941000  | 2.241856000  | 6  | 2.236278000  | -0.310398000 | 2.538835000  |
| 6 | -2.155315000 | 2.134482000  | 3.616801000  | 6  | 1.003166000  | -0.651960000 | 3.101848000  |
| 1 | -1.974805000 | 3.175695000  | 3.336322000  | 6  | 3.344759000  | -0.128853000 | 3.374245000  |
| 1 | -1.473256000 | 1.875042000  | 4.433351000  | 6  | 0.882502000  | -0.833802000 | 4.475332000  |
| 1 | -3.176054000 | 2.054451000  | 4.005407000  | 1  | 0.134255000  | -0.789342000 | 2.465768000  |
| 6 | -2.348338000 | -0.238345000 | 2.807393000  | 6  | 3.220635000  | -0.308779000 | 4.749531000  |
| 1 | -2.044457000 | -0.966473000 | 2.046605000  | 1  | 4.307506000  | 0.146588000  | 2.955264000  |
| 1 | -3.438607000 | -0.300645000 | 2.889407000  | 6  | 1.993615000  | -0.667166000 | 5.299908000  |
| 1 | -1.913047000 | -0.528948000 | 3.769362000  | 1  | -0.073331000 | -1.118563000 | 4.903433000  |
| 6 | 1.901223000  | -2.313833000 | -0.681260000 | 1  | 4.086658000  | -0.173343000 | 5.389080000  |
| 6 | 2.611806000  | -2.316863000 | -1.906311000 | 1  | 1.901598000  | -0.817486000 | 6.370773000  |
| 6 | 2.928731000  | -3.551160000 | -2.479165000 | 15 | 0.585189000  | 2.225350000  | -0.027070000 |
| 1 | 3.473429000  | -3.570472000 | -3.419062000 | 6  | 0.875044000  | 3.060240000  | -1.612219000 |
| 6 | 2.568487000  | -4.749723000 | -1.877553000 | 6  | 0.905258000  | 4.448888000  | -1.753052000 |
| 1 | 2.830004000  | -5.694579000 | -2.343305000 | 6  | 1.132120000  | 2.248272000  | -2.725054000 |
| 6 | 1.872665000  | -4.730866000 | -0.676838000 | 6  | 1.158626000  | 5.016884000  | -3.002023000 |



|    |              |              |              |    |              |              |              |
|----|--------------|--------------|--------------|----|--------------|--------------|--------------|
| 6  | -2.580104000 | 1.447737000  | 3.755315000  | 6  | 3.932203000  | -0.605334000 | 2.917083000  |
| 1  | -2.600347000 | 2.538254000  | 3.669313000  | 6  | 1.627491000  | -0.808846000 | 4.483657000  |
| 1  | -1.906837000 | 1.182596000  | 4.576848000  | 1  | 0.549801000  | -0.279187000 | 2.705091000  |
| 1  | -3.581654000 | 1.101705000  | 4.030373000  | 6  | 4.029069000  | -0.944092000 | 4.267111000  |
| 6  | -2.173154000 | -0.725631000 | 2.553814000  | 1  | 4.834086000  | -0.506681000 | 2.322246000  |
| 1  | -1.752686000 | -1.235027000 | 1.674339000  | 6  | 2.882218000  | -1.053003000 | 5.045789000  |
| 1  | -3.218505000 | -1.045844000 | 2.613868000  | 1  | 0.731853000  | -0.880576000 | 5.093044000  |
| 1  | -1.642972000 | -1.092757000 | 3.440450000  | 1  | 5.005123000  | -1.119040000 | 4.707389000  |
| 6  | 1.946220000  | -2.261847000 | -0.630009000 | 1  | 2.962351000  | -1.319802000 | 6.094667000  |
| 6  | 2.519298000  | -2.308982000 | -1.919381000 | 15 | 0.410936000  | 2.253930000  | 0.188179000  |
| 6  | 3.065612000  | -3.514800000 | -2.351972000 | 6  | 0.657787000  | 3.249186000  | -1.304228000 |
| 1  | 3.525625000  | -3.575100000 | -3.332950000 | 6  | 0.518370000  | 4.637774000  | -1.334047000 |
| 6  | 3.025567000  | -4.648341000 | -1.544478000 | 6  | 1.073698000  | 2.569826000  | -2.457098000 |
| 1  | 3.462315000  | -5.578305000 | -1.894273000 | 6  | 0.761008000  | 5.334276000  | -2.518445000 |
| 6  | 2.396792000  | -4.597885000 | -0.309624000 | 1  | 0.230524000  | 5.181625000  | -0.440443000 |
| 1  | 2.326315000  | -5.498690000 | 0.293822000  | 6  | 1.312965000  | 3.264369000  | -3.634082000 |
| 6  | 1.830855000  | -3.410961000 | 0.169008000  | 1  | 1.208677000  | 1.488913000  | -2.432345000 |
| 6  | 2.466793000  | -1.100589000 | -2.841580000 | 6  | 1.148216000  | 4.650802000  | -3.665720000 |
| 1  | 2.520216000  | -0.201246000 | -2.222599000 | 1  | 0.648578000  | 6.413199000  | -2.538864000 |
| 6  | 1.127561000  | -1.081808000 | -3.595238000 | 1  | 1.629231000  | 2.730661000  | -4.524995000 |
| 1  | 0.256685000  | -1.112005000 | -2.923432000 | 1  | 1.332145000  | 5.196285000  | -4.585691000 |
| 1  | 1.040109000  | -1.962731000 | -4.239355000 | 8  | -1.354774000 | -1.848884000 | -0.925370000 |
| 1  | 1.039894000  | -0.187985000 | -4.223985000 | 5  | -2.650859000 | -2.240954000 | -0.783622000 |
| 6  | 3.633822000  | -1.019894000 | -3.826279000 | 8  | -3.085964000 | -3.503754000 | -1.076203000 |
| 1  | 4.592360000  | -1.107007000 | -3.305850000 | 8  | -3.636449000 | -1.412930000 | -0.302193000 |
| 1  | 3.614039000  | -0.056406000 | -4.345581000 | 6  | -4.414500000 | -3.612040000 | -0.513970000 |
| 1  | 3.579508000  | -1.802415000 | -4.589950000 | 6  | -4.885866000 | -2.119091000 | -0.483388000 |
| 6  | 1.054304000  | -3.437757000 | 1.474601000  | 6  | -5.469401000 | -1.653091000 | -1.814324000 |
| 1  | 0.704581000  | -2.422286000 | 1.684733000  | 6  | -5.823560000 | -1.766318000 | 0.658449000  |
| 6  | 1.924364000  | -3.873500000 | 2.657838000  | 6  | -5.252429000 | -4.527685000 | -1.389129000 |
| 1  | 1.346287000  | -3.836687000 | 3.586770000  | 6  | -4.249337000 | -4.203908000 | 0.884268000  |
| 1  | 2.797924000  | -3.223487000 | 2.773669000  | 1  | -3.719345000 | -5.156684000 | 0.803436000  |
| 1  | 2.279017000  | -4.901424000 | 2.527253000  | 1  | -3.658276000 | -3.536947000 | 1.522824000  |
| 6  | -0.185586000 | -4.334710000 | 1.342301000  | 1  | -5.216333000 | -4.380231000 | 1.363906000  |
| 1  | -0.815581000 | -4.031372000 | 0.499663000  | 1  | -4.849188000 | -5.542977000 | -1.349583000 |
| 1  | -0.781636000 | -4.288398000 | 2.260651000  | 1  | -5.246515000 | -4.198401000 | -2.429740000 |
| 1  | 0.101934000  | -5.379656000 | 1.184839000  | 1  | -6.287311000 | -4.555828000 | -1.032387000 |
| 15 | 2.441198000  | 0.109288000  | 0.619176000  | 1  | -4.816725000 | -1.930891000 | -2.648485000 |
| 6  | 2.678162000  | -0.384363000 | 2.345045000  | 1  | -5.554377000 | -0.562239000 | -1.791422000 |
| 6  | 1.528786000  | -0.472623000 | 3.141306000  | 1  | -6.460497000 | -2.081378000 | -1.989598000 |



|                              |              |              |              |   |              |              |              |
|------------------------------|--------------|--------------|--------------|---|--------------|--------------|--------------|
| 1                            | -6.746336000 | -2.352100000 | 0.591785000  | 6 | 0.543387000  | -3.519135000 | 0.850913000  |
| 1                            | -6.082409000 | -0.705290000 | 0.599913000  | 6 | 1.910620000  | -1.241855000 | 3.671727000  |
| 1                            | -5.360303000 | -1.953264000 | 1.629876000  | 1 | 1.930863000  | -0.368484000 | 3.015497000  |
| <b>7-TSS' (in gas phase)</b> |              |              |              | 6 | 3.355624000  | -1.533572000 | 4.098690000  |
| 1                            | -3.133867000 | -0.876507000 | 2.256576000  | 1 | 4.001273000  | -1.743837000 | 3.239300000  |
| 13                           | 0.258632000  | 0.305879000  | 0.897560000  | 1 | 3.388307000  | -2.398546000 | 4.770382000  |
| 7                            | 1.351101000  | -1.176039000 | 0.746060000  | 1 | 3.776290000  | -0.674705000 | 4.631689000  |
| 7                            | 2.500753000  | -0.104854000 | -1.420265000 | 6 | 1.055487000  | -0.877719000 | 4.891373000  |
| 7                            | 0.339421000  | 1.333188000  | -0.631908000 | 1 | 0.008119000  | -0.723649000 | 4.620959000  |
| 6                            | 3.399697000  | -2.635536000 | -0.666368000 | 1 | 1.424951000  | 0.048989000  | 5.341948000  |
| 6                            | 3.835038000  | -3.576254000 | 0.277550000  | 1 | 1.104089000  | -1.657590000 | 5.658452000  |
| 1                            | 3.703994000  | -3.392611000 | 1.341724000  | 6 | 0.239983000  | -3.596872000 | -0.640890000 |
| 6                            | 4.446716000  | -4.748243000 | -0.152386000 | 1 | 0.614033000  | -2.690661000 | -1.129920000 |
| 1                            | 4.785130000  | -5.478055000 | 0.575645000  | 6 | 0.904618000  | -4.811928000 | -1.305089000 |
| 6                            | 4.626046000  | -4.982724000 | -1.516916000 | 1 | 1.950704000  | -4.922526000 | -1.018341000 |
| 1                            | 5.110452000  | -5.896088000 | -1.847526000 | 1 | 0.850337000  | -4.713130000 | -2.393989000 |
| 6                            | 4.185281000  | -4.052334000 | -2.453823000 | 1 | 0.382308000  | -5.735906000 | -1.033921000 |
| 1                            | 4.323165000  | -4.238788000 | -3.513781000 | 6 | -1.271322000 | -3.684884000 | -0.893443000 |
| 6                            | 3.572799000  | -2.874165000 | -2.030999000 | 1 | -1.791188000 | -2.785017000 | -0.561102000 |
| 1                            | 3.235816000  | -2.130438000 | -2.747694000 | 1 | -1.697817000 | -4.546799000 | -0.367332000 |
| 6                            | 2.034294000  | 2.218909000  | -2.799520000 | 1 | -1.466828000 | -3.813310000 | -1.963329000 |
| 6                            | 1.246904000  | 3.200507000  | -3.416305000 | 6 | -0.193483000 | 2.691614000  | -0.642596000 |
| 1                            | 0.164785000  | 3.187313000  | -3.316097000 | 6 | 0.642595000  | 3.760006000  | -0.245707000 |
| 6                            | 1.856099000  | 4.207394000  | -4.156261000 | 6 | 0.139124000  | 5.061710000  | -0.301729000 |
| 1                            | 1.246628000  | 4.971985000  | -4.626455000 | 1 | 0.777986000  | 5.888010000  | -0.003806000 |
| 6                            | 3.244246000  | 4.230942000  | -4.297829000 | 6 | -1.151487000 | 5.320279000  | -0.739716000 |
| 1                            | 3.713992000  | 5.014893000  | -4.883529000 | 1 | -1.519995000 | 6.340257000  | -0.789148000 |
| 6                            | 4.026454000  | 3.253002000  | -3.690729000 | 6 | -1.966086000 | 4.261158000  | -1.113863000 |
| 1                            | 5.105872000  | 3.271663000  | -3.800063000 | 1 | -2.974267000 | 4.462789000  | -1.464260000 |
| 6                            | 3.424430000  | 2.246954000  | -2.938002000 | 6 | -1.516565000 | 2.937859000  | -1.070512000 |
| 1                            | 4.020569000  | 1.477373000  | -2.457538000 | 6 | 2.076891000  | 3.587641000  | 0.232185000  |
| 6                            | 1.077840000  | -2.384219000 | 1.508184000  | 1 | 2.409563000  | 2.570374000  | -0.000280000 |
| 6                            | 1.328862000  | -2.413091000 | 2.897380000  | 6 | 2.173898000  | 3.795656000  | 1.750240000  |
| 6                            | 1.048929000  | -3.584435000 | 3.606100000  | 1 | 1.608920000  | 3.042694000  | 2.309070000  |
| 1                            | 1.247739000  | -3.614483000 | 4.673484000  | 1 | 1.776253000  | 4.779345000  | 2.023896000  |
| 6                            | 0.525393000  | -4.703175000 | 2.976451000  | 1 | 3.220845000  | 3.757394000  | 2.069141000  |
| 1                            | 0.314710000  | -5.604031000 | 3.543963000  | 6 | 3.042564000  | 4.555155000  | -0.467785000 |
| 6                            | 0.274806000  | -4.659730000 | 1.612642000  | 1 | 2.866729000  | 4.597374000  | -1.545098000 |
| 1                            | -0.132392000 | -5.537162000 | 1.118118000  | 1 | 4.075632000  | 4.235768000  | -0.295943000 |
|                              |              |              |              | 1 | 2.943673000  | 5.569804000  | -0.067626000 |

|    |              |              |              |   |              |              |              |
|----|--------------|--------------|--------------|---|--------------|--------------|--------------|
| 6  | -2.463517000 | 1.850808000  | -1.551623000 | 8 | -4.130243000 | -1.326489000 | -1.570605000 |
| 1  | -2.030894000 | 0.884285000  | -1.292351000 | 6 | -5.982782000 | -2.035359000 | -0.289838000 |
| 6  | -2.636662000 | 1.906096000  | -3.076622000 | 6 | -5.341433000 | -2.115966000 | -1.720349000 |
| 1  | -3.273665000 | 1.077956000  | -3.406163000 | 6 | -4.900784000 | -3.530732000 | -2.086468000 |
| 1  | -1.682584000 | 1.821635000  | -3.607221000 | 6 | -6.180375000 | -1.506630000 | -2.829660000 |
| 1  | -3.111699000 | 2.847398000  | -3.376775000 | 6 | -6.729334000 | -3.285295000 | 0.143459000  |
| 6  | -3.840242000 | 1.926573000  | -0.880668000 | 6 | -6.851498000 | -0.797274000 | -0.090090000 |
| 1  | -3.756244000 | 1.805401000  | 0.201908000  | 1 | -7.103398000 | -0.711311000 | 0.970054000  |
| 1  | -4.472226000 | 1.130899000  | -1.287738000 | 1 | -6.323871000 | 0.113285000  | -0.391233000 |
| 1  | -4.344088000 | 2.877071000  | -1.086437000 | 1 | -7.780480000 | -0.868315000 | -0.662532000 |
| 1  | -1.982918000 | -2.161482000 | 1.718877000  | 1 | -7.137010000 | -3.138087000 | 1.146891000  |
| 15 | 1.298139000  | 0.824662000  | -1.916179000 | 1 | -6.073764000 | -4.157596000 | 0.164506000  |
| 6  | 0.277779000  | -0.034938000 | -3.143307000 | 1 | -7.563154000 | -3.485568000 | -0.537168000 |
| 6  | -0.791031000 | -0.836177000 | -2.730529000 | 1 | -4.279245000 | -3.966523000 | -1.296930000 |
| 6  | 0.578281000  | 0.071399000  | -4.506208000 | 1 | -4.312053000 | -3.496591000 | -3.007651000 |
| 6  | -1.571936000 | -1.497749000 | -3.672462000 | 1 | -5.760487000 | -4.185050000 | -2.255148000 |
| 1  | -1.043895000 | -0.923163000 | -1.676230000 | 1 | -7.136330000 | -2.032283000 | -2.921298000 |
| 6  | -0.197741000 | -0.603111000 | -5.444494000 | 1 | -5.648164000 | -1.596474000 | -3.780844000 |
| 1  | 1.407075000  | 0.690352000  | -4.836999000 | 1 | -6.375669000 | -0.448083000 | -2.645960000 |
| 6  | -1.277275000 | -1.378677000 | -5.029050000 | 1 | 0.168953000  | 1.358790000  | 2.168853000  |
| 1  | -2.427701000 | -2.073279000 | -3.335852000 | 5 | -1.389269000 | 0.998893000  | 2.574317000  |
| 1  | 0.034114000  | -0.511321000 | -6.500579000 | 8 | -1.442133000 | 1.065121000  | 3.941641000  |
| 1  | -1.893055000 | -1.886524000 | -5.764786000 | 8 | -2.213813000 | 1.898884000  | 1.940467000  |
| 15 | 2.758208000  | -1.032359000 | -0.152770000 | 6 | -2.442715000 | 2.071982000  | 4.260302000  |
| 6  | 4.089645000  | -0.317262000 | 0.862993000  | 6 | -2.513773000 | 2.908026000  | 2.937109000  |
| 6  | 5.400344000  | -0.800752000 | 0.795578000  | 6 | -3.872530000 | 3.508153000  | 2.620932000  |
| 6  | 3.809411000  | 0.777973000  | 1.687688000  | 6 | -1.428813000 | 3.976094000  | 2.852094000  |
| 6  | 6.403334000  | -0.217230000 | 1.567154000  | 6 | -3.741772000 | 1.328002000  | 4.555205000  |
| 1  | 5.643954000  | -1.636094000 | 0.147454000  | 6 | -1.981638000 | 2.849105000  | 5.480773000  |
| 6  | 4.809033000  | 1.355582000  | 2.460845000  | 1 | -1.965457000 | 2.189010000  | 6.352150000  |
| 1  | 2.801414000  | 1.182875000  | 1.747729000  | 1 | -0.978111000 | 3.253899000  | 5.338358000  |
| 6  | 6.107982000  | 0.851716000  | 2.406638000  | 1 | -2.669894000 | 3.674742000  | 5.689479000  |
| 1  | 7.415371000  | -0.604783000 | 1.513133000  | 1 | -3.560163000 | 0.592292000  | 5.342814000  |
| 1  | 4.572666000  | 2.187817000  | 3.116059000  | 1 | -4.107054000 | 0.803899000  | 3.665505000  |
| 1  | 6.887743000  | 1.295708000  | 3.017042000  | 1 | -4.523997000 | 2.013935000  | 4.892994000  |
| 6  | -2.316449000 | -1.128406000 | 1.576556000  | 1 | -4.641369000 | 2.738291000  | 2.525266000  |
| 8  | -1.203006000 | -0.297434000 | 1.873227000  | 1 | -3.810585000 | 4.053223000  | 1.673923000  |
| 8  | -2.642572000 | -0.885193000 | 0.246169000  | 1 | -4.171992000 | 4.211417000  | 3.404853000  |
| 5  | -3.845232000 | -1.339211000 | -0.237332000 | 1 | -1.644874000 | 4.811456000  | 3.524791000  |
| 8  | -4.814879000 | -1.869784000 | 0.561232000  | 1 | -1.384677000 | 4.350666000  | 1.825518000  |

|                             |              |              |              |   |              |              |              |
|-----------------------------|--------------|--------------|--------------|---|--------------|--------------|--------------|
| 1                           | -0.447716000 | 3.567016000  | 3.111922000  | 6 | 2.467559000  | -4.212880000 | 0.716965000  |
|                             |              |              |              | 1 | 1.621445000  | -4.358887000 | 1.384893000  |
| <b>7-TS6 (in gas phase)</b> |              |              |              |   |              |              |              |
| 5                           | -3.057462000 | -0.538691000 | -0.999997000 | 6 | 3.158583000  | -5.315946000 | 0.227016000  |
| 8                           | -3.079537000 | -1.875835000 | -0.823905000 | 1 | 2.849503000  | -6.315201000 | 0.515517000  |
| 8                           | -4.112225000 | -0.002242000 | -1.657956000 | 6 | 4.242633000  | -5.137449000 | -0.633211000 |
| 6                           | -4.268942000 | -2.361399000 | -1.513157000 | 1 | 4.780250000  | -6.001748000 | -1.010306000 |
| 6                           | -5.123723000 | -1.051743000 | -1.696308000 | 6 | 4.633779000  | -3.856044000 | -1.011463000 |
| 6                           | -5.868769000 | -0.956121000 | -3.016449000 | 1 | 5.473172000  | -3.716741000 | -1.684851000 |
| 6                           | -6.069072000 | -0.785500000 | -0.530155000 | 6 | 3.952461000  | -2.745980000 | -0.518103000 |
| 6                           | -3.810177000 | -2.966422000 | -2.832625000 | 1 | 4.261394000  | -1.742351000 | -0.795454000 |
| 6                           | -4.913973000 | -3.423705000 | -0.639525000 | 6 | 0.422715000  | 2.834592000  | -0.542692000 |
| 1                           | -4.241828000 | -4.282404000 | -0.564992000 | 6 | -0.281251000 | 3.223563000  | -1.698856000 |
| 1                           | -5.103114000 | -3.049446000 | 0.368746000  | 6 | -0.731713000 | 4.541673000  | -1.799084000 |
| 1                           | -5.859139000 | -3.757658000 | -1.079697000 | 1 | -1.259683000 | 4.853937000  | -2.695956000 |
| 1                           | -3.081666000 | -3.754136000 | -2.619574000 | 6 | -0.528651000 | 5.449914000  | -0.771591000 |
| 1                           | -3.336514000 | -2.214804000 | -3.471345000 | 1 | -0.882592000 | 6.472239000  | -0.865334000 |
| 1                           | -4.652603000 | -3.404731000 | -3.374932000 | 6 | 0.116939000  | 5.037577000  | 0.386931000  |
| 1                           | -6.412709000 | -0.008968000 | -3.058213000 | 1 | 0.247973000  | 5.743003000  | 1.202809000  |
| 1                           | -6.594868000 | -1.770803000 | -3.102611000 | 6 | 0.598446000  | 3.736113000  | 0.532106000  |
| 1                           | -5.188891000 | -0.997740000 | -3.869013000 | 6 | -0.605390000 | 2.265332000  | -2.830607000 |
| 1                           | -6.868576000 | -1.530476000 | -0.493213000 | 1 | -0.365197000 | 1.255521000  | -2.487545000 |
| 1                           | -6.524465000 | 0.198894000  | -0.669776000 | 6 | 0.243772000  | 2.569288000  | -4.070485000 |
| 1                           | -5.533811000 | -0.783032000 | 0.424387000  | 1 | 1.314067000  | 2.554716000  | -3.841166000 |
| 13                          | -0.326613000 | 0.254462000  | 0.303951000  | 1 | -0.003123000 | 3.560783000  | -4.465660000 |
| 7                           | 0.878682000  | 1.458227000  | -0.419512000 | 1 | 0.055043000  | 1.834807000  | -4.861782000 |
| 7                           | 2.809616000  | -0.098096000 | 0.601294000  | 6 | -2.099554000 | 2.274850000  | -3.176675000 |
| 7                           | 0.459822000  | -1.392082000 | 0.497802000  | 1 | -2.714504000 | 2.154586000  | -2.280662000 |
| 6                           | 3.585117000  | 2.438919000  | -0.130173000 | 1 | -2.333031000 | 1.456900000  | -3.867342000 |
| 6                           | 3.583478000  | 3.557351000  | -0.972379000 | 1 | -2.391794000 | 3.209779000  | -3.666322000 |
| 1                           | 2.858943000  | 3.639239000  | -1.779573000 | 6 | 1.226854000  | 3.361750000  | 1.868303000  |
| 6                           | 4.517481000  | 4.567931000  | -0.773440000 | 1 | 1.697921000  | 2.376598000  | 1.781809000  |
| 1                           | 4.515468000  | 5.439282000  | -1.419848000 | 6 | 2.300762000  | 4.362687000  | 2.314645000  |
| 6                           | 5.459952000  | 4.455607000  | 0.249649000  | 1 | 3.003003000  | 4.595537000  | 1.511933000  |
| 1                           | 6.194336000  | 5.241626000  | 0.394619000  | 1 | 2.863758000  | 3.957135000  | 3.161367000  |
| 6                           | 5.463081000  | 3.340224000  | 1.083293000  | 1 | 1.844283000  | 5.301161000  | 2.646595000  |
| 1                           | 6.197311000  | 3.255775000  | 1.877840000  | 6 | 0.147537000  | 3.262885000  | 2.954842000  |
| 6                           | 4.523195000  | 2.328413000  | 0.898012000  | 1 | -0.643201000 | 2.570375000  | 2.659108000  |
| 1                           | 4.512117000  | 1.448235000  | 1.534482000  | 1 | -0.309468000 | 4.243550000  | 3.129294000  |
| 6                           | 2.870629000  | -2.920794000 | 0.349029000  | 1 | 0.585038000  | 2.923547000  | 3.900839000  |
|                             |              |              |              | 6 | -0.273124000 | -2.633494000 | 0.341403000  |



|   |              |              |              |   |              |              |              |
|---|--------------|--------------|--------------|---|--------------|--------------|--------------|
| 7 | -1.534553000 | -0.060329000 | -0.583679000 | 1 | 2.340669000  | -3.993449000 | -3.100029000 |
| 6 | 2.710738000  | 0.885577000  | 1.747632000  | 1 | 3.800498000  | -3.140580000 | -3.626602000 |
| 6 | 4.075972000  | 0.629556000  | 1.555857000  | 6 | 2.473485000  | 2.626793000  | -1.079024000 |
| 1 | 4.401257000  | -0.201171000 | 0.933258000  | 1 | 1.714907000  | 2.321230000  | -0.353595000 |
| 6 | 5.021423000  | 1.442073000  | 2.172294000  | 6 | 3.314683000  | 3.715331000  | -0.407034000 |
| 1 | 6.078073000  | 1.243603000  | 2.026561000  | 1 | 3.929932000  | 3.303501000  | 0.397515000  |
| 6 | 4.611215000  | 2.507222000  | 2.974837000  | 1 | 2.655125000  | 4.477853000  | 0.020316000  |
| 1 | 5.353002000  | 3.135036000  | 3.458362000  | 1 | 3.974021000  | 4.217933000  | -1.122323000 |
| 6 | 3.255646000  | 2.769576000  | 3.154852000  | 6 | 1.760409000  | 3.193613000  | -2.315316000 |
| 1 | 2.938748000  | 3.600563000  | 3.776319000  | 1 | 1.080015000  | 2.463927000  | -2.769902000 |
| 6 | 2.302015000  | 1.959237000  | 2.543366000  | 1 | 2.493253000  | 3.477976000  | -3.077931000 |
| 1 | 1.240658000  | 2.143505000  | 2.684228000  | 1 | 1.185459000  | 4.089174000  | -2.054358000 |
| 6 | -2.728141000 | -0.048341000 | 2.010330000  | 6 | -2.763526000 | -0.514175000 | -1.199686000 |
| 6 | -4.072419000 | 0.235339000  | 1.733843000  | 6 | -3.228067000 | -1.825396000 | -0.939215000 |
| 1 | -4.347049000 | 0.794259000  | 0.841779000  | 6 | -4.363500000 | -2.270638000 | -1.619520000 |
| 6 | -5.060120000 | -0.192328000 | 2.614440000  | 1 | -4.731734000 | -3.274867000 | -1.428819000 |
| 1 | -6.101738000 | 0.028422000  | 2.406018000  | 6 | -5.032318000 | -1.461050000 | -2.528086000 |
| 6 | -4.709480000 | -0.903111000 | 3.763212000  | 1 | -5.915559000 | -1.828919000 | -3.040453000 |
| 1 | -5.482666000 | -1.230289000 | 4.451096000  | 6 | -4.564603000 | -0.178171000 | -2.775347000 |
| 6 | -3.374442000 | -1.196160000 | 4.029619000  | 1 | -5.090929000 | 0.456976000  | -3.482156000 |
| 1 | -3.106424000 | -1.751737000 | 4.922235000  | 6 | -3.427599000 | 0.317449000  | -2.129955000 |
| 6 | -2.378403000 | -0.767372000 | 3.155027000  | 6 | -2.567935000 | -2.778743000 | 0.047564000  |
| 1 | -1.330418000 | -0.974170000 | 3.353512000  | 1 | -1.768186000 | -2.241191000 | 0.566735000  |
| 6 | 2.782603000  | 0.085120000  | -1.308369000 | 6 | -1.952425000 | -3.997252000 | -0.655508000 |
| 6 | 3.516628000  | -1.026035000 | -1.767927000 | 1 | -1.159871000 | -3.721477000 | -1.355141000 |
| 6 | 4.772659000  | -0.801334000 | -2.341505000 | 1 | -2.718016000 | -4.547811000 | -1.212916000 |
| 1 | 5.351963000  | -1.651011000 | -2.692526000 | 1 | -1.536103000 | -4.682384000 | 0.091087000  |
| 6 | 5.285094000  | 0.479557000  | -2.477716000 | 6 | -3.563376000 | -3.270870000 | 1.107639000  |
| 1 | 6.263187000  | 0.632461000  | -2.922656000 | 1 | -4.113953000 | -2.446797000 | 1.564519000  |
| 6 | 4.530968000  | 1.568854000  | -2.057635000 | 1 | -3.030058000 | -3.810880000 | 1.896601000  |
| 1 | 4.925593000  | 2.572292000  | -2.185059000 | 1 | -4.290790000 | -3.962382000 | 0.668874000  |
| 6 | 3.277659000  | 1.398862000  | -1.471254000 | 6 | -2.974074000 | 1.734052000  | -2.444812000 |
| 6 | 2.993503000  | -2.450783000 | -1.715469000 | 1 | -1.985446000 | 1.878404000  | -2.005799000 |
| 1 | 2.004072000  | -2.433735000 | -1.258111000 | 6 | -3.917354000 | 2.763730000  | -1.809307000 |
| 6 | 3.885353000  | -3.363392000 | -0.866929000 | 1 | -3.565486000 | 3.780251000  | -2.013161000 |
| 1 | 3.971620000  | -2.994493000 | 0.160580000  | 1 | -3.971421000 | 2.642187000  | -0.722289000 |
| 1 | 4.893292000  | -3.435372000 | -1.289214000 | 1 | -4.929910000 | 2.664209000  | -2.215518000 |
| 1 | 3.465744000  | -4.373814000 | -0.828132000 | 6 | -2.842445000 | 1.985123000  | -3.951275000 |
| 6 | 2.831449000  | -3.015559000 | -3.132587000 | 1 | -2.182219000 | 1.250887000  | -4.425784000 |
| 1 | 2.230005000  | -2.345876000 | -3.757422000 | 1 | -2.420195000 | 2.978982000  | -4.128502000 |



|    |              |              |              |    |                             |              |              |
|----|--------------|--------------|--------------|----|-----------------------------|--------------|--------------|
| 1  | 3.991397000  | -3.413610000 | -0.720600000 | 6  | -3.035036000                | -2.146876000 | -2.449500000 |
| 1  | 2.617756000  | -4.526217000 | -0.589150000 | 6  | -1.414398000                | -4.219433000 | -1.508756000 |
| 1  | 3.783245000  | -4.418442000 | 0.729767000  | 1  | -0.298463000                | -2.690306000 | -0.497412000 |
| 6  | 1.439485000  | -3.324645000 | 1.638595000  | 6  | -3.300757000                | -3.466835000 | -2.815802000 |
| 1  | 0.747570000  | -2.581337000 | 2.061429000  | 1  | -3.656307000                | -1.346484000 | -2.837344000 |
| 1  | 2.004270000  | -3.738870000 | 2.480827000  | 6  | -2.499654000                | -4.499692000 | -2.341883000 |
| 1  | 0.835553000  | -4.130129000 | 1.205031000  | 1  | -0.779809000                | -5.023232000 | -1.148438000 |
| 6  | -2.747011000 | 0.119654000  | 1.295182000  | 1  | -4.134678000                | -3.682842000 | -3.475368000 |
| 6  | -3.221711000 | 1.435344000  | 1.486129000  | 1  | -2.712237000                | -5.525134000 | -2.626469000 |
| 6  | -4.445861000 | 1.605509000  | 2.128176000  | 15 | 1.429081000                 | 0.380697000  | -1.145135000 |
| 1  | -4.841212000 | 2.605318000  | 2.275498000  | 6  | 1.874473000                 | 2.112847000  | -1.429921000 |
| 6  | -5.171008000 | 0.508809000  | 2.586558000  | 6  | 2.916502000                 | 2.511783000  | -2.268766000 |
| 1  | -6.127014000 | 0.658846000  | 3.078017000  | 6  | 1.073297000                 | 3.082611000  | -0.811963000 |
| 6  | -4.657252000 | -0.771542000 | 2.443815000  | 6  | 3.174421000                 | 3.869945000  | -2.458005000 |
| 1  | -5.207465000 | -1.618359000 | 2.844828000  | 1  | 3.522500000                 | 1.773848000  | -2.783752000 |
| 6  | -3.430487000 | -0.994191000 | 1.808529000  | 6  | 1.332939000                 | 4.432496000  | -1.000107000 |
| 6  | -2.384660000 | 2.633517000  | 1.066127000  | 1  | 0.243005000                 | 2.776380000  | -0.176424000 |
| 1  | -1.814101000 | 2.347082000  | 0.178948000  | 6  | 2.392493000                 | 4.826417000  | -1.820280000 |
| 6  | -1.386438000 | 2.989949000  | 2.178928000  | 1  | 3.986800000                 | 4.176020000  | -3.108728000 |
| 1  | -0.762265000 | 2.136957000  | 2.485045000  | 1  | 0.711833000                 | 5.177915000  | -0.513183000 |
| 1  | -1.918748000 | 3.311011000  | 3.080251000  | 1  | 2.599000000                 | 5.881605000  | -1.967479000 |
| 1  | -0.720165000 | 3.803103000  | 1.867368000  | 6  | 0.921683000                 | -0.817273000 | 4.182312000  |
| 6  | -3.209672000 | 3.859683000  | 0.674382000  | 1  | 0.839430000                 | -0.169472000 | 5.059034000  |
| 1  | -3.968189000 | 3.599233000  | -0.070062000 | 1  | 1.966351000                 | -0.832941000 | 3.847678000  |
| 1  | -2.555618000 | 4.623698000  | 0.242007000  | 8  | 0.053327000                 | -0.340671000 | 3.176786000  |
| 1  | -3.709037000 | 4.310157000  | 1.538183000  |    |                             |              |              |
| 6  | -2.851627000 | -2.398212000 | 1.782299000  |    | <b>7-TS8 (in gas phase)</b> |              |              |
| 1  | -1.922917000 | -2.371522000 | 1.205839000  | 1  | -1.651454000                | -3.543506000 | -2.443451000 |
| 6  | -3.782789000 | -3.404576000 | 1.100805000  | 13 | -0.475151000                | -0.710948000 | -0.169376000 |
| 1  | -3.308193000 | -4.390150000 | 1.059151000  | 7  | 1.336722000                 | -0.976206000 | -0.063200000 |
| 1  | -4.020821000 | -3.097603000 | 0.076923000  | 7  | 1.725616000                 | 1.644689000  | 0.390555000  |
| 1  | -4.722842000 | -3.512138000 | 1.652172000  | 7  | -0.850862000                | 1.086243000  | -0.123893000 |
| 6  | -2.491579000 | -2.843989000 | 3.206431000  | 6  | 3.999566000                 | 0.076663000  | 0.095173000  |
| 1  | -1.802403000 | -2.131887000 | 3.672147000  | 6  | 4.770315000                 | -1.070574000 | 0.327651000  |
| 1  | -2.017762000 | -3.831362000 | 3.185974000  | 1  | 4.333010000                 | -1.943145000 | 0.807730000  |
| 1  | -3.385025000 | -2.912926000 | 3.835784000  | 6  | 6.107946000                 | -1.088927000 | -0.052555000 |
| 1  | 0.624808000  | -1.831851000 | 4.469714000  | 1  | 6.707348000                 | -1.975055000 | 0.128069000  |
| 15 | -1.500839000 | -0.185011000 | -1.104208000 | 6  | 6.676297000                 | 0.030772000  | -0.661511000 |
| 6  | -1.965802000 | -1.864245000 | -1.597890000 | 1  | 7.722471000                 | 0.014462000  | -0.950296000 |
| 6  | -1.147977000 | -2.907714000 | -1.144052000 | 6  | 5.907386000                 | 1.166618000  | -0.901109000 |

|   |              |              |              |    |              |              |              |
|---|--------------|--------------|--------------|----|--------------|--------------|--------------|
| 1 | 6.351300000  | 2.034976000  | -1.376735000 | 1  | 0.633084000  | -0.894909000 | -3.548848000 |
| 6 | 4.567084000  | 1.193815000  | -0.522144000 | 1  | 1.741457000  | -1.944119000 | -4.446699000 |
| 1 | 3.955154000  | 2.075605000  | -0.690521000 | 1  | 1.897394000  | -0.185036000 | -4.564302000 |
| 6 | -0.134727000 | 3.640008000  | 0.963250000  | 6  | -2.255593000 | 1.427720000  | 0.031005000  |
| 6 | -1.230004000 | 4.456403000  | 0.647225000  | 6  | -2.790749000 | 1.569928000  | 1.331815000  |
| 1 | -1.859789000 | 4.228179000  | -0.210013000 | 6  | -4.153077000 | 1.845423000  | 1.458437000  |
| 6 | -1.503620000 | 5.573307000  | 1.429608000  | 1  | -4.579372000 | 1.960247000  | 2.451463000  |
| 1 | -2.347390000 | 6.209634000  | 1.183912000  | 6  | -4.972322000 | 1.978217000  | 0.343950000  |
| 6 | -0.695560000 | 5.872070000  | 2.527580000  | 1  | -6.027856000 | 2.201327000  | 0.466146000  |
| 1 | -0.910112000 | 6.747462000  | 3.132404000  | 6  | -4.433309000 | 1.823182000  | -0.924509000 |
| 6 | 0.380716000  | 5.050620000  | 2.851935000  | 1  | -5.076449000 | 1.918257000  | -1.795021000 |
| 1 | 1.004489000  | 5.282537000  | 3.708916000  | 6  | -3.078823000 | 1.534590000  | -1.108021000 |
| 6 | 0.666704000  | 3.934815000  | 2.068318000  | 6  | -1.967292000 | 1.424206000  | 2.604886000  |
| 1 | 1.514537000  | 3.294716000  | 2.296294000  | 1  | -0.907452000 | 1.400411000  | 2.333281000  |
| 6 | 1.884149000  | -2.224786000 | -0.558905000 | 6  | -2.300440000 | 0.117946000  | 3.338004000  |
| 6 | 1.758694000  | -3.406265000 | 0.202194000  | 1  | -2.070331000 | -0.765619000 | 2.735352000  |
| 6 | 2.251333000  | -4.598577000 | -0.337468000 | 1  | -3.366163000 | 0.078768000  | 3.589341000  |
| 1 | 2.166017000  | -5.513818000 | 0.240978000  | 1  | -1.736041000 | 0.060386000  | 4.275247000  |
| 6 | 2.844290000  | -4.635204000 | -1.590449000 | 6  | -2.164562000 | 2.600386000  | 3.569374000  |
| 1 | 3.217795000  | -5.572040000 | -1.991420000 | 1  | -2.059336000 | 3.562340000  | 3.064759000  |
| 6 | 2.961485000  | -3.463533000 | -2.327723000 | 1  | -1.422584000 | 2.548030000  | 4.372884000  |
| 1 | 3.430415000  | -3.494082000 | -3.307172000 | 1  | -3.155135000 | 2.567119000  | 4.035443000  |
| 6 | 2.494614000  | -2.243569000 | -1.834669000 | 6  | -2.567479000 | 1.345108000  | -2.527000000 |
| 6 | 1.150607000  | -3.441782000 | 1.595669000  | 1  | -1.536213000 | 0.985668000  | -2.468991000 |
| 1 | 0.657914000  | -2.483795000 | 1.778145000  | 6  | -2.562626000 | 2.675859000  | -3.290946000 |
| 6 | 2.244903000  | -3.610970000 | 2.658402000  | 1  | -2.161477000 | 2.537539000  | -4.300351000 |
| 1 | 2.984031000  | -2.804132000 | 2.616911000  | 1  | -1.952143000 | 3.432415000  | -2.787060000 |
| 1 | 2.769320000  | -4.563020000 | 2.519795000  | 1  | -3.581952000 | 3.067033000  | -3.382567000 |
| 1 | 1.804817000  | -3.608167000 | 3.660971000  | 6  | -3.378017000 | 0.294985000  | -3.298789000 |
| 6 | 0.088253000  | -4.537356000 | 1.746038000  | 1  | -3.440869000 | -0.644526000 | -2.743027000 |
| 1 | -0.682363000 | -4.465228000 | 0.974042000  | 1  | -2.914003000 | 0.111785000  | -4.274492000 |
| 1 | -0.396715000 | -4.445278000 | 2.723570000  | 1  | -4.400365000 | 0.639126000  | -3.487235000 |
| 1 | 0.534061000  | -5.536419000 | 1.699566000  | 15 | 0.339075000  | 2.262642000  | -0.100347000 |
| 6 | 2.661077000  | -1.005538000 | -2.706736000 | 6  | 0.569954000  | 2.991962000  | -1.747522000 |
| 1 | 2.457672000  | -0.118964000 | -2.099582000 | 6  | 0.735148000  | 2.122630000  | -2.830475000 |
| 6 | 4.089229000  | -0.868745000 | -3.249151000 | 6  | 0.656426000  | 4.371157000  | -1.956037000 |
| 1 | 4.833172000  | -1.000350000 | -2.460175000 | 6  | 0.942013000  | 2.620091000  | -4.110300000 |
| 1 | 4.223974000  | 0.124420000  | -3.689545000 | 1  | 0.687284000  | 1.049403000  | -2.669057000 |
| 1 | 4.290082000  | -1.605747000 | -4.033898000 | 6  | 0.867146000  | 4.869485000  | -3.240975000 |
| 6 | 1.671241000  | -1.009021000 | -3.879640000 | 1  | 0.558751000  | 5.061196000  | -1.124838000 |











|    |              |              |              |   |                             |              |              |
|----|--------------|--------------|--------------|---|-----------------------------|--------------|--------------|
| 1  | 3.946390000  | -4.958364000 | 4.937198000  | 1 | 5.714584000                 | 3.791554000  | 2.771463000  |
| 13 | -0.263664000 | 0.110865000  | -0.661629000 | 1 | 4.607698000                 | 6.154896000  | -0.640935000 |
| 1  | -0.458376000 | 0.682783000  | -4.262085000 | 1 | 6.039794000                 | 5.797256000  | 1.351051000  |
| 6  | -0.024243000 | 0.568868000  | -3.262204000 | 1 | 1.445190000                 | -0.150638000 | -0.710825000 |
| 8  | -0.868915000 | 0.156116000  | -2.347699000 | 5 | 2.210970000                 | -0.534098000 | -1.597256000 |
| 8  | 1.151016000  | 0.813275000  | -3.032546000 | 8 | 3.440938000                 | 0.007030000  | -1.597775000 |
| 6  | -0.257598000 | 1.957151000  | 0.083137000  | 8 | 2.039121000                 | -1.747624000 | -2.154007000 |
| 6  | -1.642571000 | 3.514293000  | 1.301823000  | 6 | 4.307954000                 | -1.058922000 | -2.130419000 |
| 1  | -2.654407000 | 3.868358000  | 1.466986000  | 6 | 3.291851000                 | -1.974316000 | -2.903695000 |
| 6  | -0.544968000 | 4.046948000  | 1.958991000  | 6 | 3.039036000                 | -1.519659000 | -4.335456000 |
| 1  | -0.651589000 | 4.834731000  | 2.690498000  | 6 | 3.609197000                 | -3.456778000 | -2.850372000 |
| 6  | 0.704243000  | 3.611377000  | 1.540813000  | 6 | 5.374487000                 | -0.423135000 | -3.001655000 |
| 1  | 1.625160000  | 4.057290000  | 1.901410000  | 6 | 4.926964000                 | -1.738546000 | -0.914494000 |
| 6  | -2.658325000 | 1.947838000  | -0.297886000 | 1 | 5.464576000                 | -0.990861000 | -0.326119000 |
| 1  | -2.636967000 | 0.883663000  | -0.000959000 | 1 | 4.162152000                 | -2.196245000 | -0.275919000 |
| 6  | 2.191613000  | 2.249640000  | 0.135969000  | 1 | 5.634759000                 | -2.515845000 | -1.213917000 |
| 1  | 2.090025000  | 2.123315000  | -0.945700000 | 1 | 6.030513000                 | 0.196370000  | -2.385292000 |
| 7  | -1.491545000 | 2.547013000  | 0.400482000  | 1 | 4.936108000                 | 0.204172000  | -3.779102000 |
| 7  | 0.832377000  | 2.648932000  | 0.629451000  | 1 | 5.984679000                 | -1.198853000 | -3.475011000 |
| 1  | -2.446804000 | 2.010028000  | -1.369255000 | 1 | 2.818718000                 | -0.450240000 | -4.385044000 |
| 1  | 2.413089000  | 1.272495000  | 0.581510000  | 1 | 2.184071000                 | -2.071563000 | -4.735392000 |
| 6  | -3.988423000 | 2.550053000  | 0.044833000  | 1 | 3.906973000                 | -1.731299000 | -4.965584000 |
| 6  | -4.507356000 | 3.591230000  | -0.728738000 | 1 | 4.581753000                 | -3.649623000 | -3.313875000 |
| 6  | -4.706924000 | 2.079338000  | 1.149054000  | 1 | 2.852475000                 | -4.014672000 | -3.407437000 |
| 6  | -5.735244000 | 4.158224000  | -0.399494000 | 1 | 3.631267000                 | -3.829390000 | -1.824102000 |
| 1  | -3.954949000 | 3.952949000  | -1.592380000 |   |                             |              |              |
| 6  | -5.934273000 | 2.647120000  | 1.477008000  |   | <b>8-IM2</b> (in gas phase) |              |              |
| 1  | -4.305090000 | 1.262793000  | 1.746994000  | 6 | -0.894464000                | 0.532195000  | 1.535259000  |
| 6  | -6.446711000 | 3.687243000  | 0.702333000  | 7 | -2.315249000                | 0.573393000  | 1.756203000  |
| 1  | -6.138972000 | 4.962288000  | -1.005419000 | 6 | -2.948307000                | -0.475918000 | 2.290518000  |
| 1  | -6.491805000 | 2.278468000  | 2.331549000  | 1 | -4.035233000                | -0.431363000 | 2.307059000  |
| 1  | -7.405104000 | 4.128247000  | 0.955601000  | 6 | -2.243703000                | -1.509409000 | 2.877369000  |
| 6  | 3.274929000  | 3.232721000  | 0.469841000  | 1 | -2.750782000                | -2.341912000 | 3.342752000  |
| 6  | 4.087078000  | 3.032060000  | 1.588308000  | 6 | -0.881593000                | -1.257019000 | 3.129165000  |
| 6  | 3.464386000  | 4.362556000  | -0.331220000 | 1 | -0.306447000                | -1.827524000 | 3.852080000  |
| 6  | 5.080241000  | 3.954644000  | 1.906670000  | 7 | -0.255734000                | -0.281837000 | 2.501448000  |
| 1  | 3.949905000  | 2.146422000  | 2.205023000  | 6 | -3.038248000                | 1.863136000  | 1.582879000  |
| 6  | 4.456396000  | 5.283730000  | -0.012446000 | 1 | -2.497763000                | 2.419817000  | 0.817967000  |
| 1  | 2.843267000  | 4.512652000  | -1.211053000 | 6 | 1.183287000                 | -0.059460000 | 2.722284000  |
| 6  | 5.262857000  | 5.080392000  | 1.106935000  | 1 | 1.504155000                 | 0.586831000  | 1.899072000  |

|    |              |              |              |   |              |              |              |
|----|--------------|--------------|--------------|---|--------------|--------------|--------------|
| 13 | -0.190610000 | 0.936049000  | -0.228892000 | 1 | 7.843828000  | -1.890678000 | -1.160062000 |
| 1  | -2.524672000 | 2.957543000  | -2.389617000 | 6 | 2.003054000  | -1.326759000 | 2.742107000  |
| 6  | 0.422293000  | -0.755512000 | -1.130933000 | 6 | 1.716954000  | -2.380240000 | 1.866993000  |
| 7  | 1.748613000  | -1.190700000 | -1.151959000 | 6 | 3.105078000  | -1.420868000 | 3.591584000  |
| 6  | 2.118673000  | -2.449886000 | -1.383661000 | 6 | 2.530754000  | -3.509000000 | 1.839130000  |
| 1  | 3.183724000  | -2.652578000 | -1.348647000 | 1 | 0.835780000  | -2.327300000 | 1.225515000  |
| 6  | 1.178750000  | -3.424841000 | -1.678225000 | 6 | 3.924433000  | -2.549431000 | 3.558030000  |
| 1  | 1.467662000  | -4.443937000 | -1.892554000 | 1 | 3.326526000  | -0.613487000 | 4.284692000  |
| 6  | -0.143373000 | -3.016105000 | -1.750460000 | 6 | 3.640197000  | -3.592745000 | 2.681024000  |
| 1  | -0.950193000 | -3.688274000 | -2.021335000 | 1 | 2.291773000  | -4.332783000 | 1.172734000  |
| 7  | -0.486931000 | -1.753995000 | -1.495934000 | 1 | 4.774605000  | -2.616621000 | 4.228779000  |
| 6  | 2.777843000  | -0.139557000 | -0.867628000 | 1 | 4.269489000  | -4.476427000 | 2.664572000  |
| 1  | 2.577461000  | 0.662079000  | -1.581663000 | 6 | -2.897303000 | -2.450382000 | -1.749061000 |
| 6  | -1.920348000 | -1.334666000 | -1.532086000 | 6 | -3.320842000 | -3.219758000 | -0.660904000 |
| 1  | -1.999686000 | -0.566428000 | -2.303649000 | 6 | -3.376495000 | -2.734018000 | -3.030089000 |
| 1  | -2.959632000 | 2.421945000  | 2.522715000  | 6 | -4.215764000 | -4.266851000 | -0.854082000 |
| 1  | 1.314418000  | 0.525286000  | 3.638741000  | 1 | -2.950962000 | -2.988714000 | 0.337201000  |
| 1  | 2.552509000  | 0.227844000  | 0.141722000  | 6 | -4.274566000 | -3.780894000 | -3.221493000 |
| 1  | -2.090401000 | -0.863840000 | -0.551808000 | 1 | -3.053058000 | -2.133045000 | -3.876632000 |
| 6  | -4.478004000 | 1.673384000  | 1.181295000  | 6 | -4.692147000 | -4.546353000 | -2.134729000 |
| 6  | -5.509260000 | 2.075764000  | 2.028350000  | 1 | -4.548838000 | -4.860610000 | -0.009357000 |
| 6  | -4.786342000 | 1.077491000  | -0.046880000 | 1 | -4.650968000 | -3.995464000 | -4.215986000 |
| 6  | -6.839230000 | 1.896318000  | 1.648845000  | 1 | -5.394353000 | -5.359751000 | -2.284567000 |
| 1  | -5.275912000 | 2.538479000  | 2.983934000  | 6 | -1.563180000 | 2.602693000  | -2.009646000 |
| 6  | -6.111282000 | 0.890124000  | -0.420998000 | 8 | -1.590498000 | 1.599799000  | -1.219628000 |
| 1  | -3.980793000 | 0.764644000  | -0.708822000 | 8 | -0.539100000 | 3.209907000  | -2.379891000 |
| 6  | -7.139980000 | 1.302806000  | 0.427331000  | 1 | 1.150717000  | 1.809934000  | -2.732294000 |
| 1  | -7.636745000 | 2.219399000  | 2.309441000  | 5 | 0.949827000  | 2.768003000  | -2.026322000 |
| 1  | -6.346512000 | 0.428241000  | -1.374473000 | 8 | 1.752833000  | 3.898956000  | -2.061091000 |
| 1  | -8.174601000 | 1.161889000  | 0.132784000  | 8 | 0.935157000  | 2.337332000  | -0.540943000 |
| 6  | 4.197129000  | -0.612971000 | -0.945308000 | 6 | 2.336775000  | 4.189190000  | -0.793145000 |
| 6  | 4.903136000  | -0.512765000 | -2.147419000 | 6 | 1.345948000  | 3.552410000  | 0.226571000  |
| 6  | 4.809298000  | -1.172207000 | 0.180237000  | 6 | 1.971102000  | 3.137540000  | 1.542503000  |
| 6  | 6.214502000  | -0.973235000 | -2.222649000 | 6 | 0.099430000  | 4.394335000  | 0.467252000  |
| 1  | 4.430972000  | -0.065222000 | -3.018892000 | 6 | 3.723041000  | 3.545891000  | -0.743141000 |
| 6  | 6.118662000  | -1.635140000 | 0.100652000  | 6 | 2.455496000  | 5.699730000  | -0.641763000 |
| 1  | 4.262573000  | -1.237808000 | 1.118645000  | 1 | 3.178644000  | 6.072724000  | -1.370572000 |
| 6  | 6.820051000  | -1.536276000 | -1.100347000 | 1 | 1.501779000  | 6.194609000  | -0.832521000 |
| 1  | 6.765626000  | -0.886014000 | -3.152886000 | 1 | 2.810128000  | 5.970645000  | 0.358086000  |
| 1  | 6.593911000  | -2.063518000 | 0.977198000  | 1 | 4.288199000  | 3.887169000  | -1.613105000 |

|   |              |             |              |   |              |              |              |
|---|--------------|-------------|--------------|---|--------------|--------------|--------------|
| 1 | 3.666140000  | 2.452276000 | -0.788161000 | 1 | -2.410285000 | 1.203544000  | 0.343111000  |
| 1 | 4.273422000  | 3.829253000 | 0.158470000  | 1 | 2.131664000  | 1.905803000  | -1.639288000 |
| 1 | 2.754966000  | 2.387005000 | 1.405714000  | 6 | 4.625896000  | -1.428147000 | -0.960311000 |
| 1 | 1.204922000  | 2.759235000 | 2.226735000  | 6 | 4.927071000  | -2.790998000 | -1.049505000 |
| 1 | 2.429014000  | 4.014856000 | 2.010351000  | 6 | 5.657098000  | -0.496977000 | -0.832923000 |
| 1 | 0.345593000  | 5.252884000 | 1.097596000  | 6 | 6.250447000  | -3.215719000 | -1.007862000 |
| 1 | -0.649137000 | 3.798416000 | 1.002301000  | 1 | 4.125116000  | -3.517805000 | -1.158240000 |
| 1 | -0.323800000 | 4.771220000 | -0.466330000 | 6 | 6.982108000  | -0.923571000 | -0.791474000 |

**8-TS3** (in gas phase)

|    |              |              |              |   |              |              |              |
|----|--------------|--------------|--------------|---|--------------|--------------|--------------|
| 6  | 1.096820000  | -0.947025000 | 0.298750000  | 1 | 6.482630000  | -4.272545000 | -1.085917000 |
| 7  | 2.493711000  | -1.120767000 | 0.330408000  | 1 | 7.780960000  | -0.194702000 | -0.699860000 |
| 6  | 3.166302000  | -1.384512000 | 1.445859000  | 1 | 8.310618000  | -2.614472000 | -0.849766000 |
| 1  | 4.245800000  | -1.451163000 | 1.356792000  | 6 | -3.616010000 | 2.979095000  | 0.304966000  |
| 6  | 2.498119000  | -1.623579000 | 2.640389000  | 6 | -4.045847000 | 4.081072000  | -0.440981000 |
| 1  | 3.034698000  | -1.848248000 | 3.550447000  | 6 | -4.311037000 | 2.612558000  | 1.459757000  |
| 6  | 1.121556000  | -1.793792000 | 2.552629000  | 6 | -5.156601000 | 4.810136000  | -0.030488000 |
| 1  | 0.530550000  | -2.191880000 | 3.371242000  | 1 | -3.514807000 | 4.361192000  | -1.347762000 |
| 7  | 0.471247000  | -1.523437000 | 1.427313000  | 6 | -5.425191000 | 3.341305000  | 1.869045000  |
| 6  | 3.196268000  | -0.970860000 | -0.975994000 | 1 | -3.985144000 | 1.747026000  | 2.033475000  |
| 1  | 3.134437000  | 0.089837000  | -1.246171000 | 6 | -5.845438000 | 4.440762000  | 1.124859000  |
| 6  | -0.999296000 | -1.702350000 | 1.319446000  | 1 | -5.491771000 | 5.660388000  | -0.614961000 |
| 1  | -1.430673000 | -0.688554000 | 1.349858000  | 1 | -5.966607000 | 3.048722000  | 2.762447000  |
| 13 | 0.087311000  | 0.312563000  | -0.837269000 | 1 | -6.715111000 | 5.007585000  | 1.440256000  |
| 1  | 0.660417000  | -0.149719000 | -4.558063000 | 6 | -1.602689000 | -2.564992000 | 2.389849000  |
| 6  | 0.043799000  | 2.262676000  | -0.390903000 | 6 | -2.220658000 | -1.988651000 | 3.501507000  |
| 7  | -1.108306000 | 2.829884000  | 0.215942000  | 6 | -1.538673000 | -3.958032000 | 2.278491000  |
| 6  | -1.049961000 | 3.813293000  | 1.112477000  | 6 | -2.769185000 | -2.795484000 | 4.495659000  |
| 1  | -1.992754000 | 4.116541000  | 1.556454000  | 1 | -2.276555000 | -0.905449000 | 3.587594000  |
| 6  | 0.142929000  | 4.450670000  | 1.411303000  | 6 | -2.085705000 | -4.763270000 | 3.271514000  |
| 1  | 0.189619000  | 5.262736000  | 2.121682000  | 1 | -1.066623000 | -4.407682000 | 1.407658000  |
| 6  | 1.236012000  | 4.098244000  | 0.629227000  | 6 | -2.700218000 | -4.181621000 | 4.380438000  |
| 1  | 2.179322000  | 4.635455000  | 0.662893000  | 1 | -3.252478000 | -2.343732000 | 5.355491000  |
| 7  | 1.165946000  | 3.083886000  | -0.226599000 | 1 | -2.039251000 | -5.843238000 | 3.179588000  |
| 6  | -2.411031000 | 2.194883000  | -0.127961000 | 1 | -3.129955000 | -4.810933000 | 5.152723000  |
| 1  | -2.399178000 | 2.036736000  | -1.210667000 | 6 | 3.597012000  | 2.620340000  | -0.189633000 |
| 6  | 2.365129000  | 2.794575000  | -1.046941000 | 6 | 3.527861000  | 1.885582000  | 1.000236000  |
| 1  | 2.488619000  | 3.615999000  | -1.759207000 | 6 | 4.806518000  | 3.197162000  | -0.575460000 |
| 1  | 2.598627000  | -1.543171000 | -1.690010000 | 6 | 4.662695000  | 1.726687000  | 1.788874000  |
| 1  | -1.180605000 | -2.111913000 | 0.319418000  | 1 | 2.575020000  | 1.459164000  | 1.318772000  |

|                             |              |              |              |    |              |              |              |
|-----------------------------|--------------|--------------|--------------|----|--------------|--------------|--------------|
| 6                           | 5.944885000  | 3.031372000  | 0.214710000  | 1  | -3.892786000 | 3.378166000  | -0.854892000 |
| 1                           | 4.863719000  | 3.782119000  | -1.489828000 | 7  | -2.492891000 | 1.896535000  | -1.108741000 |
| 6                           | 5.874321000  | 2.297209000  | 1.395452000  | 6  | -2.885511000 | -1.772501000 | -1.101543000 |
| 1                           | 4.600194000  | 1.171535000  | 2.720430000  | 1  | -2.220097000 | -2.087390000 | -0.289817000 |
| 1                           | 6.880483000  | 3.490026000  | -0.087803000 | 6  | -1.442624000 | 2.863596000  | -1.529037000 |
| 1                           | 6.756830000  | 2.179758000  | 2.015627000  | 1  | -0.669686000 | 2.816741000  | -0.745668000 |
| 6                           | 0.172350000  | -0.216182000 | -3.583992000 | 13 | -0.149841000 | 0.144303000  | -0.787094000 |
| 8                           | 0.797469000  | 0.187642000  | -2.577556000 | 1  | 1.440977000  | -3.120658000 | -1.945720000 |
| 8                           | -0.999557000 | -0.700043000 | -3.615260000 | 6  | 0.475656000  | 0.216875000  | 1.108162000  |
| 1                           | -1.383212000 | -0.184895000 | -1.136091000 | 7  | 1.368220000  | 1.253992000  | 1.505685000  |
| 5                           | -2.017231000 | -1.112342000 | -2.658224000 | 6  | 1.251956000  | 1.894407000  | 2.665005000  |
| 8                           | -3.225713000 | -0.514337000 | -2.748163000 | 1  | 1.944092000  | 2.713711000  | 2.837146000  |
| 8                           | -1.986716000 | -2.362796000 | -2.125666000 | 6  | 0.349199000  | 1.478665000  | 3.633490000  |
| 6                           | -4.140281000 | -1.385476000 | -2.014552000 | 1  | 0.266623000  | 1.984320000  | 4.583929000  |
| 6                           | -3.398443000 | -2.767258000 | -2.071073000 | 6  | -0.251075000 | 0.242425000  | 3.409362000  |
| 6                           | -3.609166000 | -3.654768000 | -0.858823000 | 1  | -0.784062000 | -0.299776000 | 4.185195000  |
| 6                           | -3.672529000 | -3.536421000 | -3.358660000 | 7  | -0.156419000 | -0.353427000 | 2.227912000  |
| 6                           | -4.264017000 | -0.830547000 | -0.598317000 | 6  | 2.422020000  | 1.650068000  | 0.524721000  |
| 6                           | -5.487533000 | -1.360843000 | -2.714219000 | 1  | 2.689556000  | 0.732818000  | -0.003638000 |
| 1                           | -5.931248000 | -0.366293000 | -2.622466000 | 6  | -0.734565000 | -1.702711000 | 2.063583000  |
| 1                           | -5.391106000 | -1.596403000 | -3.775053000 | 1  | -0.086744000 | -2.415496000 | 2.583695000  |
| 1                           | -6.168233000 | -2.082632000 | -2.251804000 | 1  | -2.325232000 | -1.814473000 | -2.039004000 |
| 1                           | -4.584367000 | 0.214933000  | -0.651345000 | 1  | -1.006373000 | 2.459737000  | -2.445624000 |
| 1                           | -3.306789000 | -0.882030000 | -0.067067000 | 1  | 1.958955000  | 2.331187000  | -0.198992000 |
| 1                           | -5.006908000 | -1.388714000 | -0.022013000 | 1  | -0.660778000 | -1.933240000 | 0.996671000  |
| 1                           | -3.313198000 | -3.163489000 | 0.071426000  | 6  | -4.104447000 | -2.647050000 | -1.144467000 |
| 1                           | -3.023583000 | -4.571519000 | -0.970231000 | 6  | -4.824995000 | -2.790600000 | -2.333536000 |
| 1                           | -4.663891000 | -3.936398000 | -0.778126000 | 6  | -4.539759000 | -3.294941000 | 0.013285000  |
| 1                           | -4.694572000 | -3.923589000 | -3.376958000 | 6  | -5.972189000 | -3.577043000 | -2.362146000 |
| 1                           | -2.981482000 | -4.380280000 | -3.423168000 | 1  | -4.483935000 | -2.291895000 | -3.237772000 |
| 1                           | -3.526291000 | -2.902817000 | -4.239180000 | 6  | -5.689102000 | -4.079833000 | -0.016132000 |
|                             |              |              |              | 1  | -3.974079000 | -3.188482000 | 0.935895000  |
|                             |              |              |              | 6  | -6.405095000 | -4.220158000 | -1.203001000 |
|                             |              |              |              | 1  | -6.524873000 | -3.694231000 | -3.288266000 |
|                             |              |              |              | 1  | -6.020243000 | -4.586078000 | 0.884929000  |
|                             |              |              |              | 1  | -7.297820000 | -4.836359000 | -1.228213000 |
|                             |              |              |              | 6  | 3.632981000  | 2.271025000  | 1.163546000  |
|                             |              |              |              | 6  | 4.608320000  | 1.450982000  | 1.739212000  |
|                             |              |              |              | 6  | 3.792072000  | 3.657937000  | 1.191138000  |
|                             |              |              |              | 6  | 5.725127000  | 2.016560000  | 2.344715000  |
| <b>8-IM3 (in gas phase)</b> |              |              |              |    |              |              |              |
| 6                           | -2.078639000 | 0.545717000  | -1.019873000 |    |              |              |              |
| 7                           | -3.173223000 | -0.329023000 | -0.870186000 |    |              |              |              |
| 6                           | -4.393210000 | 0.069941000  | -0.521361000 |    |              |              |              |
| 1                           | -5.139837000 | -0.707380000 | -0.399751000 |    |              |              |              |
| 6                           | -4.690529000 | 1.415998000  | -0.373526000 |    |              |              |              |
| 1                           | -5.682423000 | 1.750152000  | -0.107044000 |    |              |              |              |
| 6                           | -3.706405000 | 2.313106000  | -0.771385000 |    |              |              |              |



|   |              |              |              |    |                             |              |              |
|---|--------------|--------------|--------------|----|-----------------------------|--------------|--------------|
| 1 | 4.497586000  | 0.370282000  | 1.691120000  | 6  | 6.248223000                 | -0.877839000 | -2.320069000 |
| 6 | 4.911821000  | 4.223693000  | 1.797236000  | 6  | 6.929436000                 | -1.848626000 | -0.111242000 |
| 1 | 3.044954000  | 4.297701000  | 0.726287000  | 1  | 7.179571000                 | -0.825091000 | 0.180388000  |
| 6 | 5.875848000  | 3.402904000  | 2.376400000  | 1  | 6.597695000                 | -2.392250000 | 0.775202000  |
| 1 | 6.482936000  | 1.378470000  | 2.787871000  | 1  | 7.837311000                 | -2.323488000 | -0.495702000 |
| 1 | 5.034234000  | 5.301579000  | 1.810011000  | 1  | 6.368658000                 | 0.131342000  | -1.918693000 |
| 1 | 6.749723000  | 3.842338000  | 2.845988000  | 1  | 5.481119000                 | -0.851042000 | -3.100705000 |
| 6 | -1.925868000 | 4.271927000  | -1.716702000 | 1  | 7.193183000                 | -1.184351000 | -2.775699000 |
| 6 | -1.896160000 | 5.175550000  | -0.651305000 | 1  | 5.877722000                 | -3.023451000 | -3.792248000 |
| 6 | -2.424092000 | 4.681144000  | -2.956358000 | 1  | 5.662899000                 | -4.692823000 | -3.236347000 |
| 6 | -2.362028000 | 6.475898000  | -0.822086000 | 1  | 7.132579000                 | -3.805026000 | -2.806765000 |
| 1 | -1.502590000 | 4.860407000  | 0.312910000  | 1  | 6.474090000                 | -4.573946000 | -0.376191000 |
| 6 | -2.887986000 | 5.981838000  | -3.127612000 | 1  | 4.920549000                 | -5.195632000 | -0.957226000 |
| 1 | -2.439858000 | 3.983254000  | -3.789928000 | 1  | 4.961943000                 | -3.961587000 | 0.320531000  |
| 6 | -2.858006000 | 6.878111000  | -2.060682000 |    |                             |              |              |
| 1 | -2.331980000 | 7.176261000  | 0.005922000  |    | <b>8-TS4</b> (in gas phase) |              |              |
| 1 | -3.265941000 | 6.298255000  | -4.093969000 | 6  | 0.245132591                 | -0.653423591 | 1.898430000  |
| 1 | -3.215881000 | 7.893302000  | -2.196534000 | 7  | 0.792499295                 | -1.838320295 | 2.460659295  |
| 6 | -2.157680000 | -1.792735000 | 2.558463000  | 6  | 1.655472295                 | -1.809025000 | 3.477979295  |
| 6 | -3.058986000 | -0.753835000 | 2.302821000  | 1  | 2.044328591                 | -2.769170000 | 3.807899295  |
| 6 | -2.587091000 | -2.923608000 | 3.252607000  | 6  | 1.970284000                 | -0.631321000 | 4.131319000  |
| 6 | -4.379784000 | -0.855022000 | 2.728557000  | 1  | 2.658034000                 | -0.610094000 | 4.963456000  |
| 1 | -2.716514000 | 0.143985000  | 1.785839000  | 6  | 1.151837000                 | 0.461827000  | 3.829875000  |
| 6 | -3.913076000 | -3.025567000 | 3.674005000  | 1  | 1.126376705                 | 1.359758000  | 4.440964000  |
| 1 | -1.887867000 | -3.727104000 | 3.469376000  | 7  | 0.320959295                 | 0.422949705  | 2.801107000  |
| 6 | -4.810165000 | -1.993747000 | 3.410629000  | 6  | 0.348395295                 | -3.143085000 | 1.926724295  |
| 1 | -5.071563000 | -0.038797000 | 2.541241000  | 1  | -0.658169000                | -2.994577000 | 1.528742591  |
| 1 | -4.238038000 | -3.905346000 | 4.219547000  | 6  | -0.586181000                | 1.573199000  | 2.577637000  |
| 1 | -5.838457000 | -2.068412000 | 3.748677000  | 1  | -1.144854000                | 1.350405000  | 1.662329295  |
| 6 | 1.273520000  | -2.149751000 | -1.468792000 | 13 | -0.082473886                | -0.365445932 | -0.014493409 |
| 8 | 0.129059000  | -1.695513000 | -1.339083000 | 6  | 1.121051295                 | 0.761867705  | -1.108309295 |
| 8 | 2.297186000  | -1.487149000 | -1.041496000 | 7  | 0.930243000                 | 2.137951000  | -1.314498000 |
| 1 | 0.787766000  | 0.937672000  | -1.772625000 | 6  | 1.930129000                 | 2.989721000  | -1.540149000 |
| 5 | 3.642525000  | -1.933634000 | -1.213343000 | 1  | 1.660522000                 | 4.036674000  | -1.630052000 |
| 8 | 4.626710000  | -1.265161000 | -0.598839000 | 6  | 3.229318000                 | 2.538004000  | -1.701374000 |
| 8 | 3.954036000  | -3.000023000 | -1.964788000 | 1  | 4.040717000                 | 3.217432000  | -1.918150000 |
| 6 | 5.860275000  | -1.818559000 | -1.186507000 | 6  | 3.418973295                 | 1.159671000  | -1.702942000 |
| 6 | 5.387597000  | -3.232496000 | -1.686798000 | 1  | 4.372882295                 | 0.702119295  | -1.938919000 |
| 6 | 6.053437000  | -3.709793000 | -2.962478000 | 7  | 2.417461295                 | 0.333770000  | -1.424906000 |
| 6 | 5.440328000  | -4.301854000 | -0.603874000 | 6  | -0.480166000                | 2.618702000  | -1.225798000 |



|    |              |              |              |   |              |              |              |
|----|--------------|--------------|--------------|---|--------------|--------------|--------------|
| 7  | -2.278919000 | 1.439122000  | 1.956005000  | 1 | -7.521664000 | 1.357670000  | -1.299943000 |
| 6  | -2.883350000 | 0.761835000  | 2.936278000  | 6 | 3.108802000  | -1.971171000 | -1.333996000 |
| 1  | -3.931404000 | 0.987540000  | 3.105457000  | 6 | 3.434504000  | -2.440764000 | -2.609986000 |
| 6  | -2.195327000 | -0.121094000 | 3.743451000  | 6 | 3.880359000  | -2.352616000 | -0.234736000 |
| 1  | -2.678690000 | -0.643776000 | 4.555367000  | 6 | 4.522304000  | -3.290872000 | -2.781832000 |
| 6  | -0.800445000 | -0.108892000 | 3.607646000  | 1 | 2.842295000  | -2.134054000 | -3.469394000 |
| 1  | -0.136830000 | -0.563435000 | 4.336945000  | 6 | 4.969925000  | -3.202256000 | -0.408643000 |
| 7  | -0.231347000 | 0.484348000  | 2.572920000  | 1 | 3.638160000  | -1.964819000 | 0.751567000  |
| 6  | -2.983178000 | 2.611692000  | 1.341414000  | 6 | 5.289273000  | -3.672092000 | -1.680827000 |
| 1  | -2.265269000 | 3.067480000  | 0.658385000  | 1 | 4.778128000  | -3.648965000 | -3.773385000 |
| 6  | 1.242041000  | 0.436820000  | 2.441557000  | 1 | 5.571063000  | -3.491545000 | 0.447500000  |
| 1  | 1.491355000  | 0.847588000  | 1.457701000  | 1 | 6.140778000  | -4.330450000 | -1.818044000 |
| 13 | -0.454273000 | 1.013529000  | -0.345840000 | 6 | 1.786481000  | -0.961887000 | 2.614911000  |
| 6  | -0.475160000 | -0.833314000 | -1.020548000 | 6 | 1.086454000  | -2.065031000 | 2.112636000  |
| 7  | 0.616664000  | -1.710214000 | -1.079907000 | 6 | 3.001660000  | -1.158993000 | 3.269864000  |
| 6  | 0.492011000  | -3.035035000 | -1.024371000 | 6 | 1.599887000  | -3.349190000 | 2.265805000  |
| 1  | 1.415501000  | -3.605271000 | -1.029320000 | 1 | 0.121195000  | -1.918320000 | 1.625154000  |
| 6  | -0.758826000 | -3.633470000 | -1.006662000 | 6 | 3.517923000  | -2.447051000 | 3.417615000  |
| 1  | -0.869317000 | -4.707744000 | -0.983578000 | 1 | 3.543482000  | -0.308665000 | 3.675905000  |
| 6  | -1.861258000 | -2.795286000 | -1.167712000 | 6 | 2.818341000  | -3.542301000 | 2.917864000  |
| 1  | -2.872489000 | -3.168107000 | -1.295131000 | 1 | 1.041411000  | -4.202782000 | 1.892465000  |
| 7  | -1.708925000 | -1.479904000 | -1.196481000 | 1 | 4.457548000  | -2.592693000 | 3.940395000  |
| 6  | 1.945235000  | -1.045537000 | -1.139330000 | 1 | 3.212681000  | -4.544760000 | 3.047428000  |
| 1  | 1.871555000  | -0.320225000 | -1.956959000 | 6 | -4.212229000 | -1.172115000 | -1.285222000 |
| 6  | -2.852787000 | -0.544399000 | -1.343957000 | 6 | -4.819256000 | -1.380134000 | -0.044650000 |
| 1  | -2.688099000 | 0.018696000  | -2.267952000 | 6 | -4.888606000 | -1.516369000 | -2.457472000 |
| 1  | -3.174787000 | 3.317028000  | 2.156741000  | 6 | -6.096013000 | -1.926689000 | 0.024842000  |
| 1  | 1.671353000  | 1.128652000  | 3.172697000  | 1 | -4.296944000 | -1.086234000 | 0.864881000  |
| 1  | 2.061833000  | -0.493315000 | -0.198605000 | 6 | -6.166792000 | -2.063752000 | -2.387509000 |
| 1  | -2.754490000 | 0.156912000  | -0.499831000 | 1 | -4.422726000 | -1.341077000 | -3.424272000 |
| 6  | -4.262024000 | 2.263389000  | 0.612235000  | 6 | -6.769642000 | -2.267144000 | -1.147578000 |
| 6  | -5.454286000 | 2.031116000  | 1.308657000  | 1 | -6.571813000 | -2.077117000 | 0.988373000  |
| 6  | -4.276715000 | 2.227852000  | -0.785306000 | 1 | -6.694117000 | -2.324608000 | -3.299001000 |
| 6  | -6.618344000 | 1.693751000  | 0.624758000  | 1 | -7.768237000 | -2.688377000 | -1.094851000 |
| 1  | -5.498051000 | 2.162533000  | 2.387788000  | 6 | 0.107743000  | 2.936612000  | -1.623954000 |
| 6  | -5.445745000 | 1.900996000  | -1.469823000 | 8 | -1.084423000 | 2.312866000  | -1.379597000 |
| 1  | -3.372670000 | 2.477679000  | -1.336073000 | 8 | 1.064992000  | 2.044256000  | -0.861895000 |
| 6  | -6.612130000 | 1.613858000  | -0.766494000 | 1 | 0.425665000  | 2.913513000  | -2.668785000 |
| 1  | -7.536599000 | 1.520631000  | 1.176444000  | 5 | 2.431419000  | 2.335079000  | -0.750916000 |
| 1  | -5.447576000 | 1.883260000  | -2.555388000 | 8 | 3.245937000  | 1.557516000  | 0.003727000  |

|                             |              |              |              |   |              |              |              |
|-----------------------------|--------------|--------------|--------------|---|--------------|--------------|--------------|
| 8                           | 2.986616000  | 3.381289000  | -1.385079000 | 6 | 0.711436000  | 3.678526000  | -0.715813000 |
| 6                           | 4.606191000  | 2.007007000  | -0.346201000 | 1 | 0.817407000  | 4.746098000  | -0.589091000 |
| 6                           | 4.349933000  | 3.473882000  | -0.843350000 | 6 | 1.818046000  | 2.860383000  | -0.927846000 |
| 6                           | 4.293297000  | 4.489147000  | 0.291340000  | 1 | 2.830400000  | 3.244349000  | -1.000345000 |
| 6                           | 5.278313000  | 3.941317000  | -1.948012000 | 7 | 1.671750000  | 1.550343000  | -1.073622000 |
| 6                           | 5.478707000  | 1.891228000  | 0.888622000  | 6 | -1.986462000 | 1.110367000  | -1.127675000 |
| 6                           | 5.096831000  | 1.080043000  | -1.451708000 | 1 | -1.901781000 | 0.447782000  | -1.994963000 |
| 1                           | 5.091209000  | 0.047823000  | -1.091057000 | 6 | 2.831548000  | 0.641486000  | -1.292333000 |
| 1                           | 4.456818000  | 1.142381000  | -2.339241000 | 1 | 2.674709000  | 0.167124000  | -2.265997000 |
| 1                           | 6.117349000  | 1.334983000  | -1.748869000 | 1 | 3.181696000  | -3.326703000 | 1.896379000  |
| 1                           | 5.580280000  | 0.837762000  | 1.164884000  | 1 | -1.607933000 | -1.477373000 | 3.106050000  |
| 1                           | 5.056638000  | 2.436963000  | 1.734682000  | 1 | -2.121534000 | 0.489127000  | -0.234479000 |
| 1                           | 6.478724000  | 2.285044000  | 0.682977000  | 1 | 2.738720000  | -0.129455000 | -0.516818000 |
| 1                           | 3.629634000  | 4.154782000  | 1.095980000  | 6 | 4.409924000  | -2.223423000 | 0.504776000  |
| 1                           | 3.914366000  | 5.437214000  | -0.097327000 | 6 | 5.548141000  | -2.119299000 | 1.312991000  |
| 1                           | 5.287197000  | 4.662655000  | 0.711905000  | 6 | 4.540162000  | -2.023114000 | -0.871701000 |
| 1                           | 6.315342000  | 3.930634000  | -1.598154000 | 6 | 6.773693000  | -1.751981000 | 0.764952000  |
| 1                           | 5.026078000  | 4.966618000  | -2.228795000 | 1 | 5.488192000  | -2.361943000 | 2.372214000  |
| 1                           | 5.199010000  | 3.311851000  | -2.835790000 | 6 | 5.768320000  | -1.668578000 | -1.424117000 |
| 1                           | 0.197853000  | 3.934678000  | -1.187959000 | 1 | 3.676996000  | -2.164010000 | -1.518440000 |
| <b>8-TS5 (in gas phase)</b> |              |              |              | 6 | 6.882339000  | -1.513578000 | -0.603764000 |
| 6                           | 0.968193000  | -1.190534000 | 1.361783000  | 1 | 7.648712000  | -1.677462000 | 1.402252000  |
| 7                           | 2.335106000  | -1.419083000 | 1.689335000  | 1 | 5.857422000  | -1.520648000 | -2.495711000 |
| 6                           | 2.926591000  | -0.706767000 | 2.677396000  | 1 | 7.839477000  | -1.236014000 | -1.032804000 |
| 1                           | 4.010582000  | -0.763588000 | 2.731830000  | 6 | -3.141621000 | 2.055529000  | -1.263844000 |
| 6                           | 2.186132000  | -0.017238000 | 3.596101000  | 6 | -3.423070000 | 2.669923000  | -2.487914000 |
| 1                           | 2.644283000  | 0.530002000  | 4.407213000  | 6 | -3.953897000 | 2.305940000  | -0.156661000 |
| 6                           | 0.784834000  | -0.196350000 | 3.532559000  | 6 | -4.505908000 | 3.536216000  | -2.597992000 |
| 1                           | 0.115275000  | 0.107715000  | 4.330043000  | 1 | -2.801052000 | 2.463013000  | -3.356123000 |
| 7                           | 0.233671000  | -0.727729000 | 2.457255000  | 6 | -5.038985000 | 3.171494000  | -0.268902000 |
| 6                           | 3.068170000  | -2.579283000 | 1.102354000  | 1 | -3.746512000 | 1.799898000  | 0.782889000  |
| 1                           | 2.407070000  | -2.997989000 | 0.342796000  | 6 | -5.312715000 | 3.787857000  | -1.487938000 |
| 6                           | -1.248056000 | -0.749825000 | 2.372349000  | 1 | -4.728134000 | 4.007078000  | -3.549722000 |
| 1                           | -1.521168000 | -1.146491000 | 1.390968000  | 1 | -5.672850000 | 3.358095000  | 0.592217000  |
| 13                          | 0.288795000  | -1.004275000 | -0.462269000 | 1 | -6.160583000 | 4.458920000  | -1.578128000 |
| 6                           | 0.439264000  | 0.890450000  | -0.990890000 | 6 | -1.850402000 | 0.616414000  | 2.616019000  |
| 7                           | -0.653400000 | 1.766165000  | -0.995986000 | 6 | -1.178980000 | 1.781465000  | 2.228568000  |
| 6                           | -0.535789000 | 3.080492000  | -0.813943000 | 6 | -3.095785000 | 0.716640000  | 3.235805000  |
| 1                           | -1.462494000 | 3.644587000  | -0.783072000 | 6 | -1.746377000 | 3.030077000  | 2.467548000  |
|                             |              |              |              | 1 | -0.193260000 | 1.712138000  | 1.765561000  |





|    |              |              |              |   |              |              |              |
|----|--------------|--------------|--------------|---|--------------|--------------|--------------|
| 1  | -1.241695000 | -2.402148000 | 4.911444000  | 6 | 5.508908000  | 4.260489000  | -1.620470000 |
| 1  | -0.017344000 | -3.663612000 | 5.111670000  | 1 | 4.653099000  | 5.627022000  | -0.193652000 |
| 1  | 1.548119000  | -1.588214000 | 5.565669000  | 1 | 6.139806000  | 2.703899000  | -2.968071000 |
| 1  | 0.252818000  | -0.480057000 | 5.088329000  | 1 | 6.357159000  | 4.900441000  | -1.840065000 |
| 1  | 1.814596000  | -0.437993000 | 4.239917000  | 6 | -2.007139000 | 0.487452000  | 0.788865000  |
| 13 | -0.431020000 | -0.184438000 | -0.146116000 | 7 | -2.033898000 | 1.682210000  | 1.533697000  |
| 8  | -0.204624000 | -1.931986000 | 0.000581000  | 6 | -3.123865000 | 2.428716000  | 1.660515000  |
| 6  | 0.056687000  | 0.862974000  | -1.717582000 | 1 | -3.018474000 | 3.350536000  | 2.222989000  |
| 7  | -0.719782000 | 0.848681000  | -2.880714000 | 6 | -4.340101000 | 2.005538000  | 1.137937000  |
| 6  | -0.794769000 | 1.868605000  | -3.724841000 | 1 | -5.233906000 | 2.602356000  | 1.244897000  |
| 1  | -1.448279000 | 1.740408000  | -4.582884000 | 6 | -4.396607000 | 0.693896000  | 0.676554000  |
| 6  | -0.035337000 | 3.020251000  | -3.516960000 | 1 | -5.331734000 | 0.198820000  | 0.435690000  |
| 1  | -0.098614000 | 3.866136000  | -4.185142000 | 7 | -3.293022000 | -0.035428000 | 0.565730000  |
| 6  | 0.946701000  | 2.939014000  | -2.542884000 | 6 | -0.730150000 | 2.068448000  | 2.117821000  |
| 1  | 1.715503000  | 3.697649000  | -2.430872000 | 1 | -0.436122000 | 1.250353000  | 2.783433000  |
| 7  | 1.038912000  | 1.880763000  | -1.738523000 | 6 | -3.336834000 | -1.467809000 | 0.149415000  |
| 6  | -1.513424000 | -0.368535000 | -3.163287000 | 1 | -2.686830000 | -1.997171000 | 0.851729000  |
| 1  | -1.087839000 | -0.850556000 | -4.048528000 | 1 | -0.032842000 | 2.082385000  | 1.263034000  |
| 6  | 2.160429000  | 1.721782000  | -0.770822000 | 1 | -2.873322000 | -1.513488000 | -0.845608000 |
| 1  | 2.454152000  | 0.669143000  | -0.818573000 | 6 | -0.712140000 | 3.403858000  | 2.799815000  |
| 1  | -1.334232000 | -1.060644000 | -2.330517000 | 6 | -0.894083000 | 3.495120000  | 4.180854000  |
| 1  | 1.752913000  | 1.933544000  | 0.229000000  | 6 | -0.529579000 | 4.567281000  | 2.046191000  |
| 6  | -2.982065000 | -0.066548000 | -3.344851000 | 6 | -0.891533000 | 4.740600000  | 4.803732000  |
| 6  | -3.716966000 | -0.747427000 | -4.315189000 | 1 | -1.029917000 | 2.591102000  | 4.769392000  |
| 6  | -3.614256000 | 0.884485000  | -2.535940000 | 6 | -0.530302000 | 5.811568000  | 2.667845000  |
| 6  | -5.078980000 | -0.488430000 | -4.470601000 | 1 | -0.387322000 | 4.493769000  | 0.968758000  |
| 1  | -3.228657000 | -1.476414000 | -4.956745000 | 6 | -0.710895000 | 5.896791000  | 4.047948000  |
| 6  | -4.971632000 | 1.144291000  | -2.696658000 | 1 | -1.025720000 | 4.808031000  | 5.878065000  |
| 1  | -3.035358000 | 1.435851000  | -1.793216000 | 1 | -0.385639000 | 6.712917000  | 2.081557000  |
| 6  | -5.706713000 | 0.456122000  | -3.662879000 | 1 | -0.706269000 | 6.866308000  | 4.534894000  |
| 1  | -5.642466000 | -1.015415000 | -5.233469000 | 6 | -4.719588000 | -2.046024000 | 0.098569000  |
| 1  | -5.454296000 | 1.895679000  | -2.078422000 | 6 | -5.418065000 | -2.073921000 | -1.109584000 |
| 1  | -6.763259000 | 0.665944000  | -3.793114000 | 6 | -5.324281000 | -2.527601000 | 1.263180000  |
| 6  | 3.336795000  | 2.611313000  | -1.049305000 | 6 | -6.715304000 | -2.577267000 | -1.154494000 |
| 6  | 3.464671000  | 3.847048000  | -0.411317000 | 1 | -4.939853000 | -1.710598000 | -2.016183000 |
| 6  | 4.303207000  | 2.199624000  | -1.971451000 | 6 | -6.620138000 | -3.031220000 | 1.216791000  |
| 6  | 4.550498000  | 4.671230000  | -0.696528000 | 1 | -4.776715000 | -2.514158000 | 2.202729000  |
| 1  | 2.720802000  | 4.159514000  | 0.319578000  | 6 | -7.316095000 | -3.053987000 | 0.008368000  |
| 6  | 5.386225000  | 3.025213000  | -2.256059000 | 1 | -7.252048000 | -2.604385000 | -2.097352000 |
| 1  | 4.208300000  | 1.222856000  | -2.438990000 | 1 | -7.085206000 | -3.413145000 | 2.119408000  |









|    |              |              |              |                             |              |              |              |
|----|--------------|--------------|--------------|-----------------------------|--------------|--------------|--------------|
| 7  | -0.491273000 | -2.576988000 | -0.625979000 | 1                           | 4.632279000  | -1.826648000 | -0.053634000 |
| 6  | -3.489721000 | -1.177076000 | 0.982790000  | 6                           | 6.993500000  | -0.291394000 | 1.852654000  |
| 1  | -3.299626000 | -0.094664000 | 1.024080000  | 1                           | 6.592631000  | 1.152098000  | 3.400554000  |
| 6  | 0.790864000  | -3.111074000 | -0.139982000 | 1                           | 7.092984000  | -1.758185000 | 0.279276000  |
| 1  | 0.944953000  | -2.667671000 | 0.850047000  | 1                           | 8.067768000  | -0.266836000 | 2.002771000  |
| 13 | -0.554555000 | -0.111033000 | 1.123636000  | 6                           | 1.935418000  | -2.836963000 | -1.091120000 |
| 6  | 0.921154000  | 1.039364000  | 0.453075000  | 6                           | 1.994011000  | -1.640572000 | -1.816053000 |
| 7  | 2.262880000  | 0.720231000  | 0.369334000  | 6                           | 2.953466000  | -3.779886000 | -1.238024000 |
| 6  | 3.119955000  | 1.366943000  | -0.431908000 | 6                           | 3.066039000  | -1.390001000 | -2.668626000 |
| 1  | 4.140207000  | 0.996986000  | -0.444311000 | 1                           | 1.179080000  | -0.918894000 | -1.734635000 |
| 6  | 2.711573000  | 2.475887000  | -1.148577000 | 6                           | 4.025343000  | -3.528393000 | -2.094179000 |
| 1  | 3.393837000  | 3.015538000  | -1.790568000 | 1                           | 2.906872000  | -4.718975000 | -0.692708000 |
| 6  | 1.422782000  | 2.938949000  | -0.913363000 | 6                           | 4.084734000  | -2.333517000 | -2.807565000 |
| 1  | 1.043080000  | 3.867068000  | -1.327592000 | 1                           | 3.094997000  | -0.471146000 | -3.247105000 |
| 7  | 0.586048000  | 2.249040000  | -0.139419000 | 1                           | 4.804481000  | -4.274083000 | -2.213490000 |
| 6  | 2.754245000  | -0.390473000 | 1.257502000  | 1                           | 4.911416000  | -2.145461000 | -3.484709000 |
| 1  | 2.205724000  | -0.264097000 | 2.197113000  | 6                           | -1.119155000 | 4.076521000  | -0.469941000 |
| 6  | -0.821496000 | 2.722994000  | 0.098798000  | 6                           | -1.590756000 | 4.203230000  | -1.780144000 |
| 1  | -0.966939000 | 2.687317000  | 1.181886000  | 6                           | -0.906065000 | 5.218869000  | 0.307087000  |
| 1  | -3.127730000 | -1.619575000 | 1.915684000  | 6                           | -1.846183000 | 5.464480000  | -2.309742000 |
| 1  | 0.680421000  | -4.187713000 | 0.028791000  | 1                           | -1.768032000 | 3.314439000  | -2.382066000 |
| 1  | 2.461758000  | -1.323363000 | 0.772700000  | 6                           | -1.163095000 | 6.479011000  | -0.224176000 |
| 1  | -1.455159000 | 1.947637000  | -0.362427000 | 1                           | -0.551978000 | 5.121093000  | 1.330452000  |
| 6  | -4.951273000 | -1.447103000 | 0.775920000  | 6                           | -1.631449000 | 6.600909000  | -1.531391000 |
| 6  | -5.496607000 | -2.671078000 | 1.174760000  | 1                           | -2.220649000 | 5.561023000  | -3.323244000 |
| 6  | -5.767036000 | -0.489678000 | 0.168838000  | 1                           | -1.006827000 | 7.363937000  | 0.383355000  |
| 6  | -6.846618000 | -2.933175000 | 0.967525000  | 1                           | -1.837226000 | 7.583795000  | -1.942172000 |
| 1  | -4.865363000 | -3.414097000 | 1.656543000  | 6                           | -2.080447000 | 0.364948000  | 3.573637000  |
| 6  | -7.118489000 | -0.752628000 | -0.037841000 | 8                           | -1.245946000 | 0.637532000  | 2.469579000  |
| 1  | -5.347437000 | 0.467600000  | -0.132512000 | 1                           | -3.132396000 | 0.533988000  | 3.316593000  |
| 6  | -7.656744000 | -1.974088000 | 0.360821000  | 1                           | -1.964462000 | -0.668340000 | 3.919839000  |
| 1  | -7.269270000 | -3.879850000 | 1.286771000  | 1                           | -1.815311000 | 1.037356000  | 4.392264000  |
| 1  | -7.751628000 | -0.003273000 | -0.500821000 |                             |              |              |              |
| 1  | -8.711181000 | -2.176948000 | 0.205617000  |                             |              |              |              |
| 6  | 4.236428000  | -0.366602000 | 1.482251000  | <b>8-TS8</b> (in gas phase) |              |              |              |
| 6  | 4.786941000  | 0.474096000  | 2.453951000  | 13                          | 0.412757000  | 0.115109000  | -0.319144000 |
| 6  | 5.067616000  | -1.168929000 | 0.696317000  | 8                           | 0.592088000  | -0.918470000 | -1.700679000 |
| 6  | 6.164891000  | 0.509241000  | 2.638715000  | 5                           | 0.269973000  | -2.384490000 | -0.101260000 |
| 1  | 4.138477000  | 1.089167000  | 3.073647000  | 8                           | 1.298694000  | -3.246560000 | -0.261755000 |
| 6  | 6.446888000  | -1.129528000 | 0.882894000  | 8                           | -0.983063000 | -2.872337000 | -0.281757000 |
|    |              |              |              | 6                           | 0.688806000  | -4.445383000 | -0.862527000 |

|   |              |              |              |   |              |              |              |
|---|--------------|--------------|--------------|---|--------------|--------------|--------------|
| 6 | -0.805547000 | -4.325886000 | -0.400937000 | 1 | 1.842755000  | 7.297381000  | -2.328939000 |
| 6 | -1.823453000 | -4.856127000 | -1.393682000 | 1 | -0.281873000 | 7.485054000  | 1.400502000  |
| 6 | -1.051529000 | -4.900423000 | 0.989671000  | 1 | 0.805730000  | 8.627372000  | -0.511403000 |
| 6 | 0.845379000  | -4.326608000 | -2.373191000 | 6 | 4.689810000  | -1.316690000 | 0.568103000  |
| 6 | 1.420804000  | -5.664942000 | -0.334644000 | 6 | 5.260500000  | -1.881648000 | 1.709606000  |
| 1 | 2.449559000  | -5.663968000 | -0.703341000 | 6 | 5.446742000  | -1.193198000 | -0.601167000 |
| 1 | 1.445095000  | -5.679998000 | 0.756198000  | 6 | 6.582595000  | -2.321001000 | 1.683220000  |
| 1 | 0.934296000  | -6.579197000 | -0.688977000 | 1 | 4.669531000  | -1.989827000 | 2.616045000  |
| 1 | 1.906617000  | -4.239476000 | -2.620591000 | 6 | 6.766074000  | -1.629304000 | -0.625272000 |
| 1 | 0.316518000  | -3.449068000 | -2.759446000 | 1 | 4.997857000  | -0.761228000 | -1.493453000 |
| 1 | 0.453973000  | -5.216262000 | -2.873689000 | 6 | 7.333713000  | -2.192928000 | 0.518039000  |
| 1 | -1.758981000 | -4.336820000 | -2.352188000 | 1 | 7.021980000  | -2.766579000 | 2.569292000  |
| 1 | -2.830629000 | -4.722017000 | -0.989482000 | 1 | 7.350679000  | -1.538542000 | -1.534601000 |
| 1 | -1.667891000 | -5.926213000 | -1.563185000 | 1 | 8.362132000  | -2.537838000 | 0.496662000  |
| 1 | -1.001364000 | -5.992336000 | 0.980599000  | 6 | -1.388822000 | 0.797486000  | -0.053929000 |
| 1 | -2.048996000 | -4.605397000 | 1.326599000  | 7 | -2.197963000 | 0.687826000  | 1.080713000  |
| 1 | -0.317629000 | -4.526270000 | 1.710761000  | 6 | -3.050804000 | 1.633513000  | 1.428097000  |
| 6 | 1.985910000  | 1.228667000  | 0.122314000  | 1 | -3.635498000 | 1.462271000  | 2.325400000  |
| 7 | 1.950563000  | 2.632402000  | 0.220893000  | 6 | -3.201721000 | 2.787253000  | 0.635660000  |
| 6 | 2.894542000  | 3.353301000  | 0.837941000  | 1 | -3.850190000 | 3.593831000  | 0.946170000  |
| 1 | 2.736132000  | 4.426289000  | 0.860843000  | 6 | -2.699160000 | 2.716524000  | -0.643892000 |
| 6 | 4.005529000  | 2.753684000  | 1.389086000  | 1 | -2.977625000 | 3.425459000  | -1.419850000 |
| 1 | 4.780543000  | 3.331201000  | 1.871661000  | 7 | -1.890723000 | 1.709836000  | -1.008263000 |
| 6 | 4.106012000  | 1.367316000  | 1.257969000  | 6 | -1.989288000 | -0.534198000 | 1.919069000  |
| 1 | 4.964544000  | 0.806916000  | 1.613264000  | 1 | -2.006076000 | -1.375500000 | 1.220577000  |
| 7 | 3.151127000  | 0.667144000  | 0.662954000  | 6 | -1.799721000 | 1.351473000  | -2.460416000 |
| 6 | 0.720054000  | 3.260353000  | -0.286684000 | 1 | -0.837005000 | 0.863073000  | -2.624058000 |
| 1 | 0.537658000  | 2.824933000  | -1.279187000 | 1 | -0.973702000 | -0.433147000 | 2.327992000  |
| 6 | 3.270739000  | -0.827470000 | 0.586195000  | 1 | -1.822214000 | 2.291052000  | -3.019899000 |
| 1 | 2.756457000  | -1.124960000 | -0.330354000 | 6 | -2.999546000 | -0.704647000 | 3.014536000  |
| 1 | -0.078744000 | 2.896881000  | 0.385315000  | 6 | -4.216988000 | -1.334438000 | 2.738877000  |
| 1 | 2.718224000  | -1.232351000 | 1.441583000  | 6 | -2.743390000 | -0.224113000 | 4.300892000  |
| 6 | 0.736151000  | 4.758685000  | -0.357830000 | 6 | -5.168795000 | -1.481406000 | 3.742541000  |
| 6 | 1.345975000  | 5.406967000  | -1.436588000 | 1 | -4.413677000 | -1.713060000 | 1.738343000  |
| 6 | 0.150131000  | 5.511139000  | 0.662813000  | 6 | -3.696291000 | -0.372498000 | 5.305128000  |
| 6 | 1.372158000  | 6.796383000  | -1.489666000 | 1 | -1.793032000 | 0.257688000  | 4.519846000  |
| 1 | 1.797497000  | 4.822789000  | -2.235366000 | 6 | -4.908172000 | -1.000123000 | 5.024953000  |
| 6 | 0.175807000  | 6.902632000  | 0.607904000  | 1 | -6.110038000 | -1.976263000 | 3.527977000  |
| 1 | -0.330023000 | 5.006502000  | 1.498449000  | 1 | -3.491014000 | -0.006112000 | 6.305382000  |
| 6 | 0.787302000  | 7.543467000  | -0.467090000 | 1 | -5.648935000 | -1.120108000 | 5.808569000  |

|                         |              |              |              |                             |              |              |              |
|-------------------------|--------------|--------------|--------------|-----------------------------|--------------|--------------|--------------|
| 6                       | -2.936930000 | 0.439830000  | -2.839737000 | 1                           | -3.843826000 | -0.063795000 | 1.445274000  |
| 6                       | -4.118967000 | 0.973707000  | -3.355046000 | 1                           | -3.823716000 | -1.648329000 | 0.687525000  |
| 6                       | -2.830052000 | -0.935675000 | -2.614630000 | 6                           | -5.131670000 | -0.227498000 | -0.284798000 |
| 6                       | -5.194405000 | 0.139218000  | -3.645758000 | 1                           | -5.170528000 | -0.748863000 | -1.246601000 |
| 1                       | -4.196279000 | 2.041413000  | -3.550478000 | 1                           | -6.019911000 | -0.510835000 | 0.285190000  |
| 6                       | -3.911215000 | -1.765072000 | -2.899005000 | 1                           | -5.191907000 | 0.847278000  | -0.485352000 |
| 1                       | -1.901349000 | -1.354726000 | -2.232051000 | 7                           | 1.755259000  | -1.442236000 | -0.021821000 |
| 6                       | -5.091238000 | -1.230238000 | -3.413149000 | 6                           | 1.361786000  | -2.659977000 | -0.787703000 |
| 1                       | -6.106241000 | 0.555249000  | -4.060964000 | 6                           | 1.739202000  | -1.767691000 | 1.427397000  |
| 1                       | -3.830193000 | -2.834221000 | -2.730660000 | 1                           | 0.731755000  | -2.065772000 | 1.722459000  |
| 1                       | -5.927666000 | -1.882085000 | -3.643161000 | 1                           | 2.436436000  | -2.587336000 | 1.632246000  |
| 1                       | 0.425064000  | -1.411512000 | 0.669712000  | 1                           | 2.040552000  | -0.893223000 | 2.006976000  |
| 6                       | 1.656373000  | -1.065201000 | -2.625976000 | 6                           | 3.125601000  | -1.053526000 | -0.433006000 |
| 1                       | 2.294761000  | -1.906467000 | -2.332591000 | 1                           | 3.811437000  | -1.897178000 | -0.298357000 |
| 1                       | 1.244332000  | -1.269629000 | -3.617432000 | 1                           | 3.120018000  | -0.757152000 | -1.484876000 |
| 1                       | 2.266018000  | -0.153969000 | -2.678563000 | 1                           | 0.347823000  | -2.956098000 | -0.507970000 |
|                         |              |              |              | 1                           | 2.051556000  | -3.478389000 | -0.555941000 |
|                         |              |              |              | 1                           | 1.396280000  | -2.443981000 | -1.857364000 |
|                         |              |              |              | 1                           | 3.472970000  | -0.222733000 | 0.185357000  |
| <b>9 (in gas phase)</b> |              |              |              | <b>9-TS1 (in gas phase)</b> |              |              |              |
| 6                       | 1.418581000  | 1.841258000  | 1.428802000  | 6                           | 1.431081000  | -0.332380000 | -2.477887000 |
| 7                       | 0.953975000  | 1.762730000  | 0.023271000  | 7                           | 0.878264000  | -1.141422000 | -1.361375000 |
| 6                       | 1.994293000  | 2.319372000  | -0.880473000 | 6                           | 1.865957000  | -2.188110000 | -0.984425000 |
| 6                       | -0.277256000 | 2.591451000  | -0.118623000 | 6                           | -0.357468000 | -1.808877000 | -1.874778000 |
| 1                       | -0.037787000 | 3.641685000  | 0.079370000  | 1                           | -0.095975000 | -2.420999000 | -2.744015000 |
| 1                       | -0.664194000 | 2.498623000  | -1.137627000 | 1                           | -0.789598000 | -2.439372000 | -1.098977000 |
| 1                       | -1.032671000 | 2.249639000  | 0.591293000  | 1                           | -1.080829000 | -1.046488000 | -2.171674000 |
| 1                       | 1.555319000  | 2.887971000  | 1.722025000  | 1                           | 1.576325000  | -0.968812000 | -3.356910000 |
| 1                       | 0.678448000  | 1.378589000  | 2.086544000  | 1                           | 0.730536000  | 0.467278000  | -2.730846000 |
| 1                       | 2.912323000  | 1.736035000  | -0.794566000 | 1                           | 2.762362000  | -1.720326000 | -0.570745000 |
| 1                       | 2.204724000  | 3.358575000  | -0.605415000 | 1                           | 2.137967000  | -2.775200000 | -1.867944000 |
| 1                       | 1.637761000  | 2.276632000  | -1.910631000 | 1                           | 1.425022000  | -2.852924000 | -0.240164000 |
| 1                       | 2.376470000  | 1.325479000  | 1.528716000  | 1                           | 2.395145000  | 0.089872000  | -2.193782000 |
| 13                      | 0.338442000  | -0.087796000 | -0.548521000 | 13                          | 0.341509000  | 0.006807000  | 0.221558000  |
| 1                       | 0.502920000  | -0.006783000 | -2.119164000 | 6                           | -1.286008000 | 1.017847000  | -0.190571000 |
| 6                       | -1.288517000 | -0.537620000 | 0.450333000  | 1                           | -1.294579000 | 1.991076000  | 0.320725000  |
| 1                       | -1.309514000 | -1.617562000 | 0.664979000  | 1                           | -1.261686000 | 1.282252000  | -1.262986000 |
| 1                       | -1.308897000 | -0.063805000 | 1.445140000  | 6                           | -2.617155000 | 0.307958000  | 0.111032000  |
| 6                       | -2.590142000 | -0.188888000 | -0.300457000 |                             |              |              |              |
| 1                       | -2.602342000 | -0.693493000 | -1.276480000 |                             |              |              |              |
| 1                       | -2.632818000 | 0.886670000  | -0.526219000 |                             |              |              |              |
| 6                       | -3.852390000 | -0.572539000 | 0.472542000  |                             |              |              |              |

|                             |              |              |              |                             |              |              |              |
|-----------------------------|--------------|--------------|--------------|-----------------------------|--------------|--------------|--------------|
| 1                           | -2.690452000 | 0.101589000  | 1.186864000  | 1                           | -2.399092000 | 0.828189000  | -1.970485000 |
| 1                           | -2.649547000 | -0.677902000 | -0.373946000 | 13                          | -0.303092000 | -0.042677000 | 0.281163000  |
| 6                           | -3.838510000 | 1.115781000  | -0.328032000 | 6                           | 1.315757000  | -0.832715000 | -0.487163000 |
| 1                           | -3.771276000 | 1.310879000  | -1.406526000 | 1                           | 1.319857000  | -1.927813000 | -0.387956000 |
| 1                           | -3.813712000 | 2.096748000  | 0.163457000  | 1                           | 1.297476000  | -0.666566000 | -1.579337000 |
| 6                           | -5.152885000 | 0.408670000  | -0.008911000 | 6                           | 2.647178000  | -0.295985000 | 0.067598000  |
| 1                           | -5.251399000 | 0.232506000  | 1.066975000  | 1                           | 2.710877000  | -0.506168000 | 1.143503000  |
| 1                           | -6.012233000 | 1.002031000  | -0.330748000 | 1                           | 2.683676000  | 0.799370000  | -0.012595000 |
| 1                           | -5.208992000 | -0.562199000 | -0.512081000 | 6                           | 3.870535000  | -0.887081000 | -0.632368000 |
| 7                           | 1.759638000  | 1.577968000  | 0.321043000  | 1                           | 3.810694000  | -0.666483000 | -1.706452000 |
| 6                           | 1.443857000  | 2.218773000  | 1.629342000  | 1                           | 3.841508000  | -1.980531000 | -0.541856000 |
| 6                           | 1.606804000  | 2.612341000  | -0.733190000 | 6                           | 5.183767000  | -0.354429000 | -0.065533000 |
| 1                           | 0.564459000  | 2.932142000  | -0.781115000 | 1                           | 5.274632000  | -0.590889000 | 0.999497000  |
| 1                           | 2.238281000  | 3.477324000  | -0.501111000 | 1                           | 6.045121000  | -0.788577000 | -0.579227000 |
| 1                           | 1.909565000  | 2.212390000  | -1.701018000 | 1                           | 5.244121000  | 0.733760000  | -0.171201000 |
| 6                           | 3.171008000  | 1.129393000  | 0.378365000  | 7                           | -1.729883000 | -1.503995000 | -0.201717000 |
| 1                           | 3.826005000  | 1.975088000  | 0.616560000  | 6                           | -1.417309000 | -2.626003000 | 0.733916000  |
| 1                           | 3.278026000  | 0.365979000  | 1.152417000  | 6                           | -1.605972000 | -2.039370000 | -1.581075000 |
| 1                           | 0.412615000  | 2.576720000  | 1.626581000  | 1                           | -0.568689000 | -2.321315000 | -1.770707000 |
| 1                           | 2.115571000  | 3.068283000  | 1.793358000  | 1                           | -2.244869000 | -2.922250000 | -1.694283000 |
| 1                           | 1.579777000  | 1.496359000  | 2.436525000  | 1                           | -1.918811000 | -1.291501000 | -2.309175000 |
| 1                           | 3.478658000  | 0.718913000  | -0.585279000 | 6                           | -3.136305000 | -1.101160000 | 0.048616000  |
| 1                           | 1.212980000  | -0.545524000 | 1.563834000  | 1                           | -3.800946000 | -1.962713000 | -0.082552000 |
| 6                           | 0.218397000  | -1.741808000 | 1.971087000  | 1                           | -3.227732000 | -0.725889000 | 1.068959000  |
| 8                           | 0.623810000  | -2.197110000 | 2.959792000  | 1                           | -0.385296000 | -2.949571000 | 0.586370000  |
| 8                           | -0.566112000 | -1.674081000 | 1.034264000  | 1                           | -2.086725000 | -3.467645000 | 0.525544000  |
|                             |              |              |              | 1                           | -1.557782000 | -2.295884000 | 1.762609000  |
|                             |              |              |              | 1                           | -3.439136000 | -0.326327000 | -0.658400000 |
|                             |              |              |              | 1                           | -0.313057000 | 1.082323000  | 3.532309000  |
|                             |              |              |              | 6                           | -0.265070000 | 0.805873000  | 2.475127000  |
|                             |              |              |              | 8                           | 0.588560000  | 1.259262000  | 1.693120000  |
|                             |              |              |              | 8                           | -1.120741000 | -0.023835000 | 1.991581000  |
| <b>9-IMI (in gas phase)</b> |              |              |              | <b>9-TS2 (in gas phase)</b> |              |              |              |
| 6                           | -1.430751000 | 1.316246000  | -2.080763000 | 6                           | -2.821168000 | -0.834144000 | 2.476722000  |
| 7                           | -0.853055000 | 1.617098000  | -0.746607000 | 7                           | -1.556817000 | -0.835728000 | 1.698308000  |
| 6                           | -1.817151000 | 2.448078000  | 0.023261000  | 6                           | -1.061460000 | -2.236407000 | 1.569271000  |
| 6                           | 0.389124000  | 2.417645000  | -0.981176000 | 6                           | -0.564462000 | -0.052752000 | 2.501707000  |
| 1                           | 0.129844000  | 3.316053000  | -1.550816000 | 1                           | -0.549727000 | -0.453916000 | 3.520562000  |
| 1                           | 0.834043000  | 2.697135000  | -0.027827000 | 1                           | 0.431021000  | -0.148563000 | 2.069850000  |
| 1                           | 1.099585000  | 1.817573000  | -1.553823000 |                             |              |              |              |
| 1                           | -1.573339000 | 2.248026000  | -2.637976000 |                             |              |              |              |
| 1                           | -0.746422000 | 0.671758000  | -2.637829000 |                             |              |              |              |
| 1                           | -2.712828000 | 1.865115000  | 0.249506000  |                             |              |              |              |
| 1                           | -2.095695000 | 3.329564000  | -0.563826000 |                             |              |              |              |
| 1                           | -1.345620000 | 2.774331000  | 0.950920000  |                             |              |              |              |







|   |              |              |              |   |              |              |              |
|---|--------------|--------------|--------------|---|--------------|--------------|--------------|
| 8 | -1.419625000 | -2.047755000 | -0.026998000 | 7 | -2.127002000 | -0.567947000 | 0.045473000  |
| 1 | -0.163490000 | -0.279457000 | -1.155280000 | 6 | -2.612664000 | -1.558297000 | -0.944853000 |
| 5 | 1.359447000  | -1.430060000 | -0.674499000 | 7 | 0.031804000  | 1.201234000  | -0.059787000 |
| 8 | 2.360059000  | -1.209961000 | -1.551856000 | 7 | 2.126371000  | -0.595021000 | 0.042586000  |
| 8 | 1.555398000  | -0.924360000 | 0.591861000  | 6 | 2.744015000  | -1.858367000 | -0.415031000 |
| 6 | 3.315752000  | -0.341318000 | -0.888757000 | 6 | -2.835755000 | -0.799996000 | 1.324031000  |
| 6 | 2.980042000  | -0.572101000 | 0.628146000  | 1 | -3.914502000 | -0.646689000 | 1.202585000  |
| 6 | 3.699122000  | -1.779395000 | 1.222173000  | 1 | -2.650849000 | -1.824607000 | 1.651352000  |
| 6 | 3.171488000  | 0.650343000  | 1.506661000  | 1 | -2.454792000 | -0.126288000 | 2.093971000  |
| 6 | 4.714616000  | -0.778684000 | -1.292167000 | 6 | 2.816168000  | -0.152405000 | 1.270466000  |
| 6 | 3.044588000  | 1.079835000  | -1.362771000 | 1 | 2.724761000  | -0.935074000 | 2.025211000  |
| 1 | 3.120055000  | 1.105964000  | -2.452775000 | 1 | 3.877157000  | 0.041351000  | 1.070831000  |
| 1 | 2.040954000  | 1.402198000  | -1.080473000 | 1 | 2.359381000  | 0.754088000  | 1.668957000  |
| 1 | 3.771844000  | 1.783587000  | -0.947415000 | 6 | -0.240180000 | 1.967340000  | 1.184687000  |
| 1 | 4.859589000  | -0.587259000 | -2.358155000 | 1 | 0.599045000  | 1.858651000  | 1.871097000  |
| 1 | 4.873368000  | -1.843067000 | -1.111765000 | 1 | -0.386715000 | 3.028776000  | 0.953826000  |
| 1 | 5.466499000  | -0.207706000 | -0.737744000 | 1 | -1.125573000 | 1.579694000  | 1.686718000  |
| 1 | 3.565718000  | -2.667220000 | 0.595928000  | 6 | -1.081453000 | 1.389140000  | -1.032949000 |
| 1 | 3.285821000  | -1.990151000 | 2.212311000  | 6 | 2.188278000  | 0.418447000  | -1.029284000 |
| 1 | 4.770320000  | -1.589668000 | 1.329247000  | 6 | 1.343301000  | 1.631710000  | -0.646366000 |
| 1 | 4.220538000  | 0.962817000  | 1.488183000  | 1 | -3.148729000 | 0.805650000  | -1.232271000 |
| 1 | 2.913869000  | 0.410466000  | 2.542897000  | 1 | -2.741135000 | 1.432284000  | 0.355631000  |
| 1 | 2.558024000  | 1.490670000  | 1.171733000  | 1 | -1.206777000 | 2.454872000  | -1.261582000 |
| 7 | -3.332656000 | -0.403186000 | -1.064365000 | 1 | -0.799490000 | 0.867772000  | -1.954339000 |
| 6 | -3.016844000 | -0.223291000 | -2.507781000 | 1 | 3.223170000  | 0.726900000  | -1.229099000 |
| 6 | -4.360542000 | 0.602136000  | -0.682559000 | 1 | 1.792644000  | -0.049554000 | -1.936391000 |
| 1 | -3.958262000 | 1.609559000  | -0.758135000 | 1 | 1.863250000  | 2.242591000  | 0.094559000  |
| 1 | -5.227260000 | 0.507823000  | -1.346616000 | 1 | 1.173202000  | 2.266884000  | -1.520791000 |
| 1 | -4.687406000 | 0.416059000  | 0.341936000  | 1 | 0.008678000  | -1.263201000 | 1.778910000  |
| 6 | -3.966864000 | -1.736605000 | -0.902770000 | 1 | 0.033241000  | -1.627222000 | -1.133324000 |
| 1 | -4.941918000 | -1.737216000 | -1.402599000 | 1 | -2.163138000 | -1.359089000 | -1.918216000 |
| 1 | -3.341671000 | -2.507706000 | -1.347203000 | 1 | -3.705212000 | -1.507969000 | -1.021097000 |
| 1 | -2.610207000 | 0.775569000  | -2.675440000 | 1 | -2.313904000 | -2.560981000 | -0.632382000 |
| 1 | -3.924912000 | -0.350006000 | -3.108663000 | 1 | 2.608597000  | -2.619405000 | 0.357368000  |
| 1 | -2.274993000 | -0.965055000 | -2.813757000 | 1 | 3.816065000  | -1.716805000 | -0.595858000 |
| 1 | -4.104981000 | -1.958606000 | 0.157146000  | 1 | 2.254519000  | -2.192646000 | -1.330206000 |

**10** (in gas phase)

|    |              |              |              |
|----|--------------|--------------|--------------|
| 6  | -2.370745000 | 0.808501000  | -0.461195000 |
| 13 | 0.027162000  | -0.844177000 | 0.250738000  |

**10-TS1** (in gas phase)

|    |              |              |              |
|----|--------------|--------------|--------------|
| 6  | 2.315413000  | -1.231117000 | -0.621808000 |
| 13 | -0.012230000 | 0.194777000  | 0.526093000  |

|   |              |              |              |                              |              |              |              |
|---|--------------|--------------|--------------|------------------------------|--------------|--------------|--------------|
| 7 | 2.109643000  | 0.012473000  | 0.183943000  | <b>10-IM1 (in gas phase)</b> |              |              |              |
| 6 | 2.678788000  | 1.164036000  | -0.556287000 | 6                            | -2.344717000 | 1.075763000  | -0.550636000 |
| 7 | -0.076492000 | -1.721718000 | -0.307590000 | 13                           | 0.015100000  | -0.374225000 | 0.565234000  |
| 7 | -2.106305000 | 0.120705000  | 0.202547000  | 7                            | -2.118648000 | -0.183541000 | 0.225740000  |
| 6 | -2.750962000 | 1.436240000  | 0.000856000  | 6                            | -2.756857000 | -1.309951000 | -0.503728000 |
| 6 | 2.809350000  | -0.085645000 | 1.488877000  | 7                            | 0.046044000  | 1.558956000  | -0.238376000 |
| 1 | 3.885632000  | -0.226844000 | 1.337784000  | 7                            | 2.108907000  | -0.231980000 | 0.240911000  |
| 1 | 2.636960000  | 0.834224000  | 2.051651000  | 6                            | 2.825840000  | -1.511263000 | 0.031918000  |
| 1 | 2.403355000  | -0.915985000 | 2.067920000  | 6                            | -2.771046000 | -0.102506000 | 1.558338000  |
| 6 | -2.781984000 | -0.561086000 | 1.328609000  | 1                            | -3.849238000 | 0.057525000  | 1.444885000  |
| 1 | -2.704960000 | 0.066609000  | 2.217497000  | 1                            | -2.593976000 | -1.038064000 | 2.092990000  |
| 1 | -3.837741000 | -0.738443000 | 1.091387000  | 1                            | -2.335020000 | 0.706582000  | 2.144314000  |
| 1 | -2.294164000 | -1.510277000 | 1.550624000  | 6                            | 2.729298000  | 0.439891000  | 1.406424000  |
| 6 | 0.185944000  | -2.783834000 | 0.695462000  | 1                            | 2.648224000  | -0.213226000 | 2.276240000  |
| 1 | -0.632573000 | -2.816304000 | 1.414018000  | 1                            | 3.784643000  | 0.655347000  | 1.201412000  |
| 1 | 0.281191000  | -3.758081000 | 0.201902000  | 1                            | 2.207777000  | 1.367718000  | 1.638673000  |
| 1 | 1.094435000  | -2.567257000 | 1.255217000  | 6                            | -0.230713000 | 2.585864000  | 0.799702000  |
| 6 | 1.023485000  | -1.671050000 | -1.304651000 | 1                            | 0.590722000  | 2.616710000  | 1.514120000  |
| 6 | -2.209263000 | -0.662981000 | -1.052237000 | 1                            | -0.348561000 | 3.570606000  | 0.332687000  |
| 6 | -1.405650000 | -1.956938000 | -0.950232000 | 1                            | -1.130690000 | 2.336898000  | 1.358394000  |
| 1 | 3.089691000  | -1.067038000 | -1.378030000 | 6                            | -1.060382000 | 1.538940000  | -1.231596000 |
| 1 | 2.685041000  | -2.019159000 | 0.037681000  | 6                            | 2.234622000  | 0.598836000  | -0.982392000 |
| 1 | 1.162428000  | -2.653894000 | -1.773354000 | 6                            | 1.367970000  | 1.852252000  | -0.875728000 |
| 1 | 0.734587000  | -0.953983000 | -2.078953000 | 1                            | -3.121419000 | 0.919581000  | -1.305488000 |
| 1 | -3.258997000 | -0.893952000 | -1.276314000 | 1                            | -2.719174000 | 1.846575000  | 0.126392000  |
| 1 | -1.819982000 | -0.032843000 | -1.856072000 | 1                            | -1.203046000 | 2.538659000  | -1.661891000 |
| 1 | -1.946488000 | -2.690349000 | -0.348276000 | 1                            | -0.777878000 | 0.850371000  | -2.032069000 |
| 1 | -1.275557000 | -2.396057000 | -1.944702000 | 1                            | 3.281718000  | 0.889468000  | -1.140294000 |
| 1 | -0.006771000 | -0.191546000 | 2.063307000  | 1                            | 1.918022000  | -0.016636000 | -1.825703000 |
| 1 | -0.022812000 | 0.999116000  | -0.967255000 | 1                            | 1.872350000  | 2.607644000  | -0.269285000 |
| 1 | 2.174117000  | 1.275815000  | -1.517663000 | 1                            | 1.220414000  | 2.288581000  | -1.868621000 |
| 1 | 3.751295000  | 1.011424000  | -0.720432000 | 1                            | 0.004641000  | 0.003050000  | 2.105131000  |
| 1 | 2.549344000  | 2.075541000  | 0.031169000  | 1                            | -0.014435000 | -3.289888000 | -1.236372000 |
| 1 | -2.624527000 | 2.043975000  | 0.899433000  | 1                            | -2.371360000 | -1.356107000 | -1.522064000 |
| 1 | -3.821587000 | 1.309336000  | -0.196955000 | 1                            | -3.841846000 | -1.161336000 | -0.534699000 |
| 1 | -2.296734000 | 1.941526000  | -0.854737000 | 1                            | -2.545745000 | -2.245426000 | 0.017043000  |
| 6 | 0.062461000  | 2.620911000  | -0.224205000 | 1                            | 2.642891000  | -2.172268000 | 0.880703000  |
| 8 | 0.039952000  | 3.360124000  | -1.116892000 | 1                            | 3.902152000  | -1.327503000 | -0.062843000 |
| 8 | 0.110098000  | 2.246240000  | 0.926312000  | 1                            | 2.474142000  | -1.984728000 | -0.885687000 |
|   |              |              |              | 6                            | -0.007284000 | -2.346462000 | -0.679977000 |

|                              |              |              |              |                              |              |              |              |
|------------------------------|--------------|--------------|--------------|------------------------------|--------------|--------------|--------------|
| 8                            | -0.048875000 | -2.331663000 | 0.581848000  | 1                            | -2.971034000 | -2.692239000 | 1.727968000  |
| 8                            | 0.040611000  | -1.233016000 | -1.277833000 | 1                            | -4.167673000 | -2.244785000 | 0.498653000  |
|                              |              |              |              | 6                            | -2.638492000 | 2.795129000  | 1.095354000  |
| <b>10-TS2 (in gas phase)</b> |              |              |              | 1                            | -2.902247000 | 2.559428000  | 2.127785000  |
| 1                            | 0.422569000  | -0.188737000 | -0.756472000 | 1                            | -2.349400000 | 3.849737000  | 1.020258000  |
| 5                            | 1.597092000  | -0.145937000 | -0.546580000 | 1                            | -3.515429000 | 2.610722000  | 0.473608000  |
| 8                            | 2.413114000  | -1.201117000 | -0.775338000 | 6                            | -4.158783000 | 0.458427000  | -1.525671000 |
| 8                            | 2.220544000  | 1.015217000  | -0.204913000 | 1                            | -4.613428000 | 1.246564000  | -0.925731000 |
| 6                            | 3.740499000  | -0.797383000 | -0.325754000 | 1                            | -4.393399000 | 0.615544000  | -2.585036000 |
| 6                            | 3.649727000  | 0.770159000  | -0.367544000 | 1                            | -4.587632000 | -0.485605000 | -1.191895000 |
| 6                            | 4.393859000  | 1.477118000  | 0.751790000  | 6                            | -2.066794000 | -0.608628000 | -2.134883000 |
| 6                            | 4.030624000  | 1.358797000  | -1.722773000 | 6                            | -1.089271000 | 2.266332000  | -0.709909000 |
| 6                            | 3.922453000  | -1.356497000 | 1.081520000  | 6                            | -2.155124000 | 1.810753000  | -1.698196000 |
| 6                            | 4.770252000  | -1.394597000 | -1.270680000 | 1                            | -1.870930000 | -2.754921000 | -2.032447000 |
| 1                            | 4.756226000  | -2.483825000 | -1.181336000 | 1                            | -3.489637000 | -2.171391000 | -1.679713000 |
| 1                            | 4.566757000  | -1.133216000 | -2.310635000 | 1                            | -2.408419000 | -0.549472000 | -3.176473000 |
| 1                            | 5.774196000  | -1.044997000 | -1.008836000 | 1                            | -0.983687000 | -0.463893000 | -2.123346000 |
| 1                            | 3.801806000  | -2.442476000 | 1.042924000  | 1                            | -0.936253000 | 3.349373000  | -0.802455000 |
| 1                            | 3.174024000  | -0.955545000 | 1.768311000  | 1                            | -0.127741000 | 1.784562000  | -0.894192000 |
| 1                            | 4.923291000  | -1.135042000 | 1.463171000  | 1                            | -2.990260000 | 2.514484000  | -1.700465000 |
| 1                            | 4.017155000  | 1.176106000  | 1.730958000  | 1                            | -1.751204000 | 1.793755000  | -2.716027000 |
| 1                            | 4.270749000  | 2.558670000  | 0.648901000  | 1                            | -0.021000000 | -2.177244000 | -0.320715000 |
| 1                            | 5.463564000  | 1.250202000  | 0.700563000  | 1                            | -0.941550000 | -3.703465000 | -0.214995000 |
| 1                            | 3.770075000  | 2.420384000  | -1.734585000 | 1                            | -0.655184000 | -2.721549000 | 1.238773000  |
| 1                            | 3.490313000  | 0.861663000  | -2.534505000 | 1                            | -0.652574000 | 1.982844000  | 2.607404000  |
| 1                            | 5.103451000  | 1.263857000  | -1.910742000 | 1                            | -0.111542000 | 3.288686000  | 1.521340000  |
| 1                            | -0.044730000 | -0.879519000 | 3.680651000  | 1                            | 0.509157000  | 1.630634000  | 1.295550000  |
| 6                            | -0.138238000 | -0.688017000 | 2.600757000  |                              |              |              |              |
| 8                            | 0.831647000  | -0.678530000 | 1.870671000  | <b>10-IM2 (in gas phase)</b> |              |              |              |
| 8                            | -1.376615000 | -0.491350000 | 2.230197000  | 1                            | 0.047635000  | -0.652179000 | 3.858990000  |
| 13                           | -2.272205000 | -0.012186000 | 0.737887000  | 6                            | -0.063138000 | -0.459492000 | 2.787525000  |
| 1                            | -3.773717000 | 0.129262000  | 1.199994000  | 8                            | 1.009846000  | -0.435258000 | 2.124755000  |
| 6                            | -2.428996000 | -1.957443000 | -1.532439000 | 8                            | -1.231295000 | -0.293481000 | 2.348960000  |
| 7                            | -2.136045000 | -1.963174000 | -0.069347000 | 1                            | -0.076867000 | 0.041113000  | 0.236903000  |
| 6                            | -0.852000000 | -2.681893000 | 0.170127000  | 5                            | 1.125804000  | -0.094120000 | 0.602755000  |
| 7                            | -2.686440000 | 0.468569000  | -1.324925000 | 8                            | 1.716359000  | -1.135996000 | -0.148664000 |
| 7                            | -1.500339000 | 1.933393000  | 0.676866000  | 8                            | 1.896475000  | 1.085429000  | 0.481578000  |
| 6                            | -0.359222000 | 2.223008000  | 1.584874000  | 6                            | 3.091365000  | -0.748806000 | -0.361918000 |
| 6                            | -3.196836000 | -2.715572000 | 0.660010000  | 6                            | 2.981436000  | 0.809952000  | -0.426399000 |
| 1                            | -3.223164000 | -3.753885000 | 0.311577000  | 6                            | 4.221300000  | 1.550227000  | 0.051196000  |



|                          |              |              |              |    |              |              |              |
|--------------------------|--------------|--------------|--------------|----|--------------|--------------|--------------|
| 1                        | 3.077213000  | 2.657887000  | -1.274082000 | 13 | -0.000842000 | 0.000481000  | -0.000051000 |
| 1                        | 2.161387000  | 1.198280000  | -3.036512000 | 7  | -1.450930000 | 1.559619000  | -0.267547000 |
| 1                        | 0.734082000  | 0.832279000  | -2.038259000 | 6  | -2.632852000 | 1.207257000  | 0.548553000  |
| 1                        | 1.312329000  | -3.280068000 | -1.320485000 | 7  | 1.451494000  | 1.558938000  | 0.267650000  |
| 1                        | 0.225521000  | -1.899349000 | -1.060701000 | 7  | 1.451496000  | -1.559298000 | -0.267572000 |
| 1                        | 3.072260000  | -1.909271000 | -2.162471000 | 6  | 1.866803000  | 1.839844000  | 1.656918000  |
| 1                        | 1.623297000  | -1.241626000 | -2.893537000 | 1  | 2.274183000  | 0.946855000  | 2.125488000  |
| 1                        | -0.394746000 | 2.230399000  | -0.237368000 | 1  | 2.622115000  | 2.636304000  | 1.662758000  |
| 1                        | 0.302115000  | 3.790702000  | 0.305336000  | 1  | 1.008061000  | 2.145710000  | 2.252051000  |
| 1                        | -0.010727000 | 2.474662000  | 1.465893000  | 6  | 0.724070000  | 2.740293000  | -0.256104000 |
| 1                        | 0.940853000  | -2.586049000 | 2.312565000  | 6  | 2.633068000  | -1.207125000 | 0.548683000  |
| 1                        | 0.667605000  | -3.833740000 | 1.076030000  | 6  | 2.633224000  | 1.206499000  | -0.548552000 |
| 1                        | -0.315543000 | -2.351932000 | 1.055113000  | 1  | -1.228119000 | 3.668106000  | -0.044006000 |
| 1                        | 0.163951000  | -0.010894000 | 0.077659000  | 1  | -0.742360000 | 2.692262000  | 1.348513000  |
| 5                        | -1.807559000 | -0.148463000 | 0.990845000  | 1  | 1.229561000  | 3.667552000  | 0.044365000  |
| 8                        | -2.295994000 | 1.043878000  | 0.560366000  | 1  | 0.743414000  | 2.692110000  | -1.348270000 |
| 8                        | -2.251645000 | -1.244492000 | 0.321216000  | 1  | 3.316272000  | 2.065821000  | -0.614820000 |
| 6                        | -3.382005000 | 0.714266000  | -0.353131000 | 1  | 2.259696000  | 1.003257000  | -1.556548000 |
| 6                        | -3.014534000 | -0.742670000 | -0.812428000 | 7  | -1.451781000 | -1.559554000 | 0.267535000  |
| 6                        | -4.208314000 | -1.656780000 | -1.030805000 | 6  | -2.633397000 | -1.206736000 | -0.548673000 |
| 6                        | -2.096710000 | -0.770975000 | -2.030117000 | 6  | -3.420936000 | 0.000396000  | 0.000000000  |
| 6                        | -4.666971000 | 0.774418000  | 0.466929000  | 6  | 0.723328000  | -2.740128000 | 0.256214000  |
| 6                        | -3.409309000 | 1.746873000  | -1.466422000 | 6  | -0.723618000 | -2.740235000 | -0.256552000 |
| 1                        | -3.651950000 | 2.727201000  | -1.048279000 | 6  | -1.867203000 | -1.840924000 | 1.656610000  |
| 1                        | -2.444632000 | 1.817583000  | -1.974626000 | 6  | 3.421125000  | -0.000351000 | 0.000066000  |
| 1                        | -4.176173000 | 1.492769000  | -2.205073000 | 1  | 4.084732000  | -0.330281000 | -0.805711000 |
| 1                        | -4.758459000 | 1.770018000  | 0.907770000  | 1  | 3.316164000  | -2.066410000 | 0.615146000  |
| 1                        | -4.652841000 | 0.040422000  | 1.278681000  | 1  | 2.259578000  | -1.003731000 | 1.556678000  |
| 1                        | -5.545555000 | 0.587792000  | -0.156404000 | 1  | -2.259470000 | 1.003859000  | 1.556585000  |
| 1                        | -4.799541000 | -1.768184000 | -0.120743000 | 1  | -3.315841000 | 2.066589000  | 0.614789000  |
| 1                        | -3.860936000 | -2.646938000 | -1.336810000 | 1  | -4.084621000 | -0.329251000 | 0.805813000  |
| 1                        | -4.850606000 | -1.259955000 | -1.823592000 | 1  | -4.084550000 | 0.330325000  | -0.805747000 |
| 1                        | -1.768379000 | -1.800100000 | -2.202892000 | 1  | -2.259911000 | -1.003436000 | -1.556682000 |
| 1                        | -1.215761000 | -0.142692000 | -1.863331000 | 1  | -3.316851000 | -2.065725000 | -0.615030000 |
| 1                        | -2.617454000 | -0.424068000 | -2.926649000 | 1  | -0.742817000 | -2.691628000 | -1.348700000 |
| 13                       | 1.710225000  | 0.049961000  | 0.634875000  | 1  | -1.228631000 | -3.667903000 | 0.043497000  |
| 1                        | 3.150237000  | 0.069027000  | 1.330221000  | 1  | 1.228492000  | -3.667693000 | -0.043892000 |
|                          |              |              |              | 1  | 0.742368000  | -2.691679000 | 1.348386000  |
| <b>11 (in gas phase)</b> |              |              |              | 1  | -2.622498000 | -2.637409000 | 1.662172000  |
| 6                        | -0.723007000 | 2.740625000  | 0.256352000  | 1  | -1.008526000 | -2.147005000 | 2.251764000  |

|                              |              |              |              |                              |              |              |              |
|------------------------------|--------------|--------------|--------------|------------------------------|--------------|--------------|--------------|
| 1                            | -2.274633000 | -0.948045000 | 2.125419000  | 1                            | 3.603604000  | -1.647674000 | -0.094761000 |
| 6                            | -1.866204000 | 1.840860000  | -1.656834000 | 1                            | 2.547527000  | -0.846060000 | 1.061456000  |
| 6                            | 1.866878000  | -1.840564000 | -1.656696000 | 1                            | -2.494598000 | 0.734028000  | 1.303785000  |
| 1                            | -2.620840000 | 2.637929000  | -1.662488000 | 1                            | -3.612806000 | 1.664730000  | 0.294760000  |
| 1                            | -1.007250000 | 2.145831000  | -2.252110000 | 1                            | -4.040031000 | -0.866183000 | 0.481692000  |
| 1                            | -2.274507000 | 0.948120000  | -2.125104000 | 1                            | -4.144276000 | -0.164005000 | -1.110935000 |
| 1                            | 2.274496000  | -0.947809000 | -2.125526000 | 1                            | -2.123272000 | -1.137128000 | -1.887098000 |
| 1                            | 2.622007000  | -2.637224000 | -1.662379000 | 1                            | -2.973050000 | -2.397807000 | -0.989880000 |
| 1                            | 1.008140000  | -2.146463000 | -2.251842000 | 1                            | -0.474551000 | -2.669106000 | -1.741991000 |
| 1                            | 4.084832000  | 0.329540000  | 0.805780000  | 1                            | -0.801349000 | -3.699805000 | -0.344729000 |
| 1                            | -0.000531000 | -0.000992000 | -1.630664000 | 1                            | 1.646621000  | -3.446409000 | -0.563838000 |
| 1                            | -0.000848000 | 0.000058000  | 1.630607000  | 1                            | 1.137781000  | -2.559611000 | 0.882767000  |
| <b>11-TS1 (in gas phase)</b> |              |              |              | 1                            | -2.327325000 | -2.920937000 | 1.189868000  |
| 6                            | -1.098880000 | 2.621256000  | 0.104322000  | 1                            | -0.777363000 | -2.377142000 | 1.878144000  |
| 7                            | -1.668265000 | 1.380813000  | -0.493154000 | 1                            | -2.133145000 | -1.259518000 | 1.831704000  |
| 6                            | -2.839935000 | 0.884820000  | 0.281833000  | 6                            | -2.122847000 | 1.701428000  | -1.871315000 |
| 7                            | 1.181783000  | 1.674781000  | -0.000389000 | 6                            | 1.986296000  | -1.530706000 | -2.171630000 |
| 7                            | 1.615411000  | -1.321180000 | -0.752586000 | 1                            | -2.949679000 | 2.418881000  | -1.815779000 |
| 6                            | 1.704355000  | 2.001769000  | 1.358629000  | 1                            | -1.310285000 | 2.124910000  | -2.458348000 |
| 1                            | 2.210070000  | 1.144981000  | 1.801192000  | 1                            | -2.457325000 | 0.803988000  | -2.386938000 |
| 1                            | 2.413717000  | 2.831553000  | 1.262674000  | 1                            | 2.303615000  | -0.594002000 | -2.626411000 |
| 1                            | 0.885950000  | 2.281142000  | 2.017672000  | 1                            | 2.802942000  | -2.259871000 | -2.233590000 |
| 6                            | 0.318783000  | 2.817295000  | -0.430598000 | 1                            | 1.131139000  | -1.890450000 | -2.741471000 |
| 6                            | 2.819058000  | -0.885278000 | 0.002527000  | 1                            | 4.007517000  | 0.861298000  | 0.308902000  |
| 6                            | 2.349898000  | 1.530466000  | -0.920688000 | 1                            | 0.637345000  | -0.522663000 | 1.206883000  |
| 1                            | -1.724638000 | 3.484951000  | -0.150910000 | 6                            | 0.279949000  | -0.257720000 | 2.299644000  |
| 1                            | -1.089870000 | 2.494586000  | 1.188515000  | 8                            | 0.926160000  | -0.862992000 | 3.131542000  |
| 1                            | 0.744923000  | 3.758572000  | -0.066378000 | 8                            | -0.654669000 | 0.563000000  | 2.282207000  |
| 1                            | 0.326524000  | 2.853691000  | -1.523468000 | 13                           | -0.039020000 | 0.040601000  | -0.474789000 |
| 1                            | 2.861279000  | 2.499469000  | -0.990361000 | 1                            | -0.081689000 | 0.098009000  | -2.076393000 |
| 1                            | 1.942646000  | 1.304196000  | -1.910554000 | <b>11-IMI (in gas phase)</b> |              |              |              |
| 7                            | -1.228280000 | -1.632149000 | -0.068802000 | 6                            | 0.812214000  | -2.610874000 | -0.396673000 |
| 6                            | -2.459504000 | -1.432719000 | -0.888951000 | 13                           | -0.063609000 | 0.087425000  | -0.296767000 |
| 6                            | -3.440116000 | -0.403132000 | -0.307483000 | 7                            | 1.428125000  | -1.324423000 | -0.821341000 |
| 6                            | 1.060254000  | -2.589684000 | -0.209615000 | 6                            | 2.695480000  | -1.026004000 | -0.106225000 |
| 6                            | -0.395850000 | -2.729723000 | -0.653033000 | 7                            | -1.412996000 | -1.561409000 | -0.151501000 |
| 6                            | -1.645702000 | -2.069513000 | 1.295811000  | 7                            | -1.592163000 | 1.576833000  | -0.289134000 |
| 6                            | 3.369453000  | 0.465452000  | -0.486839000 | 6                            | -1.826060000 | -2.089911000 | 1.171335000  |
| 1                            | 4.031561000  | 0.311594000  | -1.345079000 | 1                            | -2.260028000 | -1.302307000 | 1.783937000  |











|                            |              |              |              |    |              |              |              |
|----------------------------|--------------|--------------|--------------|----|--------------|--------------|--------------|
| 1                          | 2.635774000  | -4.316497000 | -0.728049000 | 6  | 0.000221000  | 3.008231000  | 1.219314000  |
| 6                          | 2.706017000  | -1.251699000 | 0.496001000  | 6  | -1.252362000 | 2.615237000  | 0.469786000  |
| 1                          | 4.415550000  | -2.651234000 | 0.469493000  | 6  | -2.439850000 | 3.317870000  | 0.355386000  |
| 13                         | 0.000002000  | 0.000014000  | 0.512050000  | 7  | -1.399489000 | 1.356088000  | -0.061004000 |
| 6                          | -4.786191000 | 0.000914000  | 1.019273000  | 6  | -3.367406000 | 2.444121000  | -0.269454000 |
| 1                          | -5.210219000 | 0.885575000  | 1.507019000  | 1  | -2.627989000 | 4.327683000  | 0.698808000  |
| 1                          | -5.084413000 | 0.000622000  | -0.033386000 | 6  | -2.701483000 | 1.251503000  | -0.504227000 |
| 1                          | -5.210455000 | -0.883345000 | 1.507551000  | 1  | -4.399960000 | 2.664695000  | -0.509743000 |
| 6                          | -2.943761000 | 0.001202000  | 2.671701000  | 6  | 1.252800000  | 2.615047000  | 0.469886000  |
| 1                          | -3.376649000 | -0.893039000 | 3.139547000  | 6  | 2.440515000  | 3.317364000  | 0.355886000  |
| 1                          | -1.866049000 | 0.000817000  | 2.841332000  | 7  | 1.399655000  | 1.355978000  | -0.061165000 |
| 1                          | -3.375965000 | 0.896099000  | 3.138933000  | 6  | 3.367933000  | 2.443493000  | -0.268987000 |
| 6                          | -0.001154000 | -4.512216000 | -1.470761000 | 1  | 2.628878000  | 4.327050000  | 0.699558000  |
| 1                          | 0.885472000  | -4.796804000 | -2.047922000 | 6  | 2.701705000  | 1.251122000  | -0.504151000 |
| 1                          | -0.001226000 | -5.070178000 | -0.528976000 | 1  | 4.400589000  | 2.663828000  | -0.509054000 |
| 1                          | -0.888003000 | -4.796459000 | -2.047790000 | 6  | 3.256248000  | -0.000200000 | -1.162875000 |
| 6                          | -0.001135000 | -2.282045000 | -2.575531000 | 6  | 2.701464000  | -1.251509000 | -0.504309000 |
| 1                          | 0.895396000  | -2.550318000 | -3.148763000 | 6  | 3.367404000  | -2.444112000 | -0.269518000 |
| 1                          | -0.898085000 | -2.550042000 | -3.148217000 | 7  | 1.399485000  | -1.356086000 | -0.061037000 |
| 1                          | -0.000909000 | -1.198121000 | -2.427734000 | 6  | 2.439876000  | -3.317846000 | 0.355386000  |
| 6                          | 0.000964000  | 4.512297000  | -1.470649000 | 1  | 4.399951000  | -2.664686000 | -0.509836000 |
| 1                          | 0.000660000  | 5.070224000  | -0.528843000 | 6  | 1.252387000  | -2.615218000 | 0.469803000  |
| 1                          | 0.887935000  | 4.796661000  | -2.047413000 | 1  | 2.628033000  | -4.327647000 | 0.698833000  |
| 1                          | -0.885535000 | 4.796813000  | -2.048051000 | 6  | -0.000169000 | -3.008202000 | 1.219383000  |
| 6                          | 0.001262000  | 2.282136000  | -2.575555000 | 6  | -1.252772000 | -2.615041000 | 0.469984000  |
| 1                          | -0.895205000 | 2.550391000  | -3.148882000 | 6  | -2.440467000 | -3.317390000 | 0.355970000  |
| 1                          | 0.898262000  | 2.550188000  | -3.148137000 | 7  | -1.399665000 | -1.355965000 | -0.061037000 |
| 1                          | 0.001097000  | 1.198206000  | -2.427812000 | 6  | -3.367910000 | -2.443533000 | -0.268884000 |
| 6                          | 4.786273000  | -0.000914000 | 1.018613000  | 1  | -2.628801000 | -4.327087000 | 0.699626000  |
| 1                          | 5.210449000  | -0.885525000 | 1.506314000  | 6  | -2.701718000 | -1.251136000 | -0.504022000 |
| 1                          | 5.084257000  | -0.000719000 | -0.034122000 | 1  | -4.400560000 | -2.663893000 | -0.508953000 |
| 1                          | 5.210618000  | 0.883406000  | 1.506692000  | 13 | -0.000012000 | -0.000003000 | -0.467421000 |
| 6                          | 2.944239000  | -0.001327000 | 2.671544000  | 6  | 4.786242000  | -0.000357000 | -1.018292000 |
| 1                          | 3.377015000  | 0.893030000  | 3.139286000  | 1  | 5.215957000  | 0.880764000  | -1.505191000 |
| 1                          | 1.866562000  | -0.001249000 | 2.841402000  | 1  | 5.090791000  | -0.000462000 | 0.033090000  |
| 1                          | 3.376809000  | -0.896156000 | 3.138565000  | 1  | 5.215791000  | -0.881486000 | -1.505320000 |
|                            |              |              |              | 6  | 2.961506000  | -0.000049000 | -2.680949000 |
| <b>12</b> (in THF solvent) |              |              |              | 1  | 3.399848000  | -0.890743000 | -3.148044000 |
| 1                          | -0.000074000 | -0.000044000 | -2.089042000 | 1  | 1.888757000  | 0.000120000  | -2.879456000 |
| 6                          | -3.256304000 | 0.000177000  | -1.162729000 | 1  | 3.400102000  | 0.890593000  | -3.147905000 |

|                              |              |              |              |    |              |              |              |
|------------------------------|--------------|--------------|--------------|----|--------------|--------------|--------------|
| 6                            | -0.000243000 | -4.514394000 | 1.492133000  | 6  | -2.346240000 | 3.548644000  | -0.282727000 |
| 1                            | -0.883437000 | -4.798531000 | 2.073384000  | 7  | -1.343506000 | 1.540769000  | -0.014227000 |
| 1                            | -0.000405000 | -5.089586000 | 0.560281000  | 6  | -3.310277000 | 2.631778000  | 0.205087000  |
| 1                            | 0.883062000  | -4.798654000 | 2.073157000  | 1  | -2.506795000 | 4.590165000  | -0.532427000 |
| 6                            | -0.000066000 | -2.281720000 | 2.584583000  | 6  | -2.668300000 | 1.415401000  | 0.347067000  |
| 1                            | -0.891953000 | -2.549494000 | 3.163952000  | 1  | -4.350865000 | 2.839219000  | 0.420559000  |
| 1                            | 0.892353000  | -2.548784000 | 3.163461000  | 6  | -3.249329000 | 0.119406000  | 0.868783000  |
| 1                            | -0.000558000 | -1.195593000 | 2.445800000  | 6  | -2.714084000 | -1.070040000 | 0.090711000  |
| 6                            | 0.000310000  | 4.514428000  | 1.492035000  | 6  | -3.396943000 | -2.228210000 | -0.236033000 |
| 1                            | 0.000445000  | 5.089603000  | 0.560172000  | 7  | -1.429716000 | -1.137545000 | -0.404742000 |
| 1                            | -0.882976000 | 4.798702000  | 2.073081000  | 6  | -2.499650000 | -3.041738000 | -0.971878000 |
| 1                            | 0.883522000  | 4.798574000  | 2.073254000  | 1  | -4.424894000 | -2.461414000 | 0.012314000  |
| 6                            | 0.000163000  | 2.281779000  | 2.584532000  | 6  | -1.311462000 | -2.341959000 | -1.051025000 |
| 1                            | 0.892067000  | 2.549571000  | 3.163865000  | 1  | -2.703418000 | -4.016567000 | -1.397442000 |
| 1                            | -0.892239000 | 2.548852000  | 3.163432000  | 6  | -0.067986000 | -2.685920000 | -1.834442000 |
| 1                            | 0.000657000  | 1.195648000  | 2.445776000  | 6  | 1.187763000  | -2.420387000 | -1.039708000 |
| 6                            | -4.786291000 | 0.000334000  | -1.018042000 | 6  | 2.335707000  | -3.185314000 | -0.963484000 |
| 1                            | -5.216038000 | -0.880797000 | -1.504893000 | 7  | 1.371011000  | -1.229219000 | -0.383952000 |
| 1                            | -5.090766000 | 0.000458000  | 0.033362000  | 6  | 3.275468000  | -2.427375000 | -0.221060000 |
| 1                            | -5.215876000 | 0.881452000  | -1.505056000 | 1  | 2.486447000  | -4.166798000 | -1.395806000 |
| 6                            | -2.961672000 | -0.000002000 | -2.680825000 | 6  | 2.656766000  | -1.235309000 | 0.112375000  |
| 1                            | -3.400048000 | 0.890684000  | -3.147904000 | 1  | 4.288779000  | -2.718031000 | 0.026828000  |
| 1                            | -1.888937000 | -0.000175000 | -2.879410000 | 13 | 0.006000000  | 0.089963000  | 0.137979000  |
| 1                            | -3.400302000 | -0.890653000 | -3.147732000 | 6  | -2.966225000 | -0.004047000 | 2.384504000  |
|                              |              |              |              | 1  | -1.913396000 | 0.156412000  | 2.612921000  |
|                              |              |              |              | 1  | -3.541646000 | 0.758098000  | 2.926578000  |
|                              |              |              |              | 1  | -3.254922000 | -0.998332000 | 2.747096000  |
|                              |              |              |              | 6  | -4.777570000 | 0.153477000  | 0.708042000  |
|                              |              |              |              | 1  | -5.197830000 | 1.007205000  | 1.250311000  |
|                              |              |              |              | 1  | -5.058341000 | 0.228581000  | -0.346538000 |
|                              |              |              |              | 1  | -5.220967000 | -0.755980000 | 1.127638000  |
|                              |              |              |              | 6  | 0.156718000  | 4.823729000  | -1.147620000 |
|                              |              |              |              | 1  | 0.168195000  | 5.251880000  | -0.140481000 |
|                              |              |              |              | 1  | 1.054395000  | 5.154098000  | -1.681064000 |
|                              |              |              |              | 1  | -0.716063000 | 5.210134000  | -1.684688000 |
|                              |              |              |              | 6  | 0.094297000  | 2.762170000  | -2.539831000 |
|                              |              |              |              | 1  | -0.789387000 | 3.134226000  | -3.072998000 |
|                              |              |              |              | 1  | 1.003236000  | 3.074886000  | -3.068664000 |
|                              |              |              |              | 1  | 0.057831000  | 1.668301000  | -2.543332000 |
|                              |              |              |              | 6  | -0.112319000 | -4.154662000 | -2.262450000 |
| <b>12-TS1 (in gas phase)</b> |              |              |              |    |              |              |              |
| 8                            | -0.233133000 | -2.515770000 | 2.132896000  |    |              |              |              |
| 6                            | -0.106103000 | -1.531920000 | 2.784006000  |    |              |              |              |
| 8                            | -0.014634000 | -0.995403000 | 3.850981000  |    |              |              |              |
| 1                            | -0.020292000 | -0.313738000 | 1.780378000  |    |              |              |              |
| 6                            | 3.253161000  | -0.079192000 | 0.895300000  |    |              |              |              |
| 6                            | 0.108241000  | 3.294214000  | -1.085867000 |    |              |              |              |
| 6                            | 1.345558000  | 2.767029000  | -0.402830000 |    |              |              |              |
| 6                            | 2.569102000  | 3.395688000  | -0.269713000 |    |              |              |              |
| 7                            | 1.443122000  | 1.453399000  | -0.006424000 |    |              |              |              |
| 6                            | 3.471609000  | 2.422138000  | 0.225902000  |    |              |              |              |
| 1                            | 2.794847000  | 4.425142000  | -0.518990000 |    |              |              |              |
| 6                            | 2.755330000  | 1.247781000  | 0.364946000  |    |              |              |              |
| 1                            | 4.521422000  | 2.565387000  | 0.448655000  |    |              |              |              |
| 6                            | -1.162728000 | 2.845889000  | -0.408426000 |    |              |              |              |

|                                |              |              |              |    |              |              |              |
|--------------------------------|--------------|--------------|--------------|----|--------------|--------------|--------------|
| 1                              | -0.136761000 | -4.809339000 | -1.386011000 | 7  | -1.410035000 | -1.189644000 | -0.393088000 |
| 1                              | -1.003531000 | -4.345318000 | -2.870617000 | 6  | -2.417146000 | -3.138786000 | -0.922567000 |
| 1                              | 0.770093000  | -4.401379000 | -2.863233000 | 1  | -4.343466000 | -2.624217000 | 0.099346000  |
| 6                              | -0.033893000 | -1.816886000 | -3.113540000 | 6  | -1.261186000 | -2.389972000 | -1.044008000 |
| 1                              | 0.858099000  | -2.049226000 | -3.708841000 | 1  | -2.598034000 | -4.119607000 | -1.344805000 |
| 1                              | -0.933505000 | -1.990900000 | -3.717212000 | 6  | -0.025971000 | -2.679453000 | -1.863604000 |
| 1                              | -0.000508000 | -0.755072000 | -2.851127000 | 6  | 1.231988000  | -2.385381000 | -1.080306000 |
| 6                              | 2.943289000  | -0.183503000 | 2.406437000  | 6  | 2.402180000  | -3.119436000 | -1.021026000 |
| 1                              | 3.193993000  | -1.184490000 | 2.779027000  | 7  | 1.387787000  | -1.199766000 | -0.404124000 |
| 1                              | 3.535932000  | 0.562121000  | 2.952812000  | 6  | 3.327984000  | -2.344758000 | -0.273433000 |
| 1                              | 1.892690000  | 0.009903000  | 2.618349000  | 1  | 2.580494000  | -4.086775000 | -1.474180000 |
| 6                              | 4.782325000  | -0.135356000 | 0.753317000  | 6  | 2.679275000  | -1.173680000 | 0.081125000  |
| 1                              | 5.165438000  | -1.070983000 | 1.174754000  | 1  | 4.351346000  | -2.610733000 | -0.040303000 |
| 1                              | 5.080603000  | -0.073463000 | -0.297372000 | 13 | -0.002488000 | 0.082484000  | 0.132949000  |
| 1                              | 5.245521000  | 0.690166000  | 1.304232000  | 6  | -2.959146000 | -0.049758000 | 2.402056000  |
| <b>12-TS1 (in THF solvent)</b> |              |              |              | 1  | -1.909965000 | 0.152479000  | 2.615099000  |
| 8                              | 0.063705000  | -2.477140000 | 2.327217000  | 1  | -3.555790000 | 0.702356000  | 2.933057000  |
| 6                              | 0.015426000  | -1.448633000 | 2.912987000  | 1  | -3.211984000 | -1.040699000 | 2.799031000  |
| 8                              | -0.022999000 | -0.810618000 | 3.917711000  | 6  | -4.786463000 | 0.008114000  | 0.735810000  |
| 1                              | -0.005130000 | -0.272237000 | 1.774286000  | 1  | -5.232312000 | 0.857993000  | 1.261860000  |
| 6                              | 3.254309000  | -0.013222000 | 0.876721000  | 1  | -5.086715000 | 0.051048000  | -0.315717000 |
| 6                              | 0.019275000  | 3.282019000  | -1.111950000 | 1  | -5.202745000 | -0.901977000 | 1.179670000  |
| 6                              | 1.263575000  | 2.790216000  | -0.411328000 | 6  | 0.023135000  | 4.812952000  | -1.176404000 |
| 6                              | 2.465821000  | 3.455618000  | -0.255312000 | 1  | 0.010651000  | 5.254465000  | -0.174863000 |
| 7                              | 1.399936000  | 1.475847000  | -0.022121000 | 1  | 0.913555000  | 5.171113000  | -1.703021000 |
| 6                              | 3.394725000  | 2.505587000  | 0.242817000  | 1  | -0.850717000 | 5.175739000  | -1.726815000 |
| 1                              | 2.664542000  | 4.492430000  | -0.495476000 | 6  | 0.041037000  | 2.745228000  | -2.563981000 |
| 6                              | 2.715882000  | 1.306262000  | 0.362973000  | 1  | -0.841560000 | 3.090051000  | -3.115779000 |
| 1                              | 4.436645000  | 2.681816000  | 0.478086000  | 1  | 0.942845000  | 3.085476000  | -3.086843000 |
| 6                              | -1.245765000 | 2.794169000  | -0.445953000 | 1  | 0.038897000  | 1.649513000  | -2.572118000 |
| 6                              | -2.454009000 | 3.458437000  | -0.339674000 | 6  | -0.030921000 | -4.138012000 | -2.328278000 |
| 7                              | -1.388990000 | 1.488797000  | -0.029297000 | 1  | -0.014285000 | -4.827029000 | -1.477349000 |
| 6                              | -3.392317000 | 2.518501000  | 0.159718000  | 1  | -0.925211000 | -4.344591000 | -2.925250000 |
| 1                              | -2.648724000 | 4.488881000  | -0.608852000 | 1  | 0.842019000  | -4.341489000 | -2.956971000 |
| 6                              | -2.713480000 | 1.325285000  | 0.329735000  | 6  | -0.045782000 | -1.779420000 | -3.120468000 |
| 1                              | -4.439492000 | 2.698522000  | 0.367070000  | 1  | 0.839140000  | -1.964866000 | -3.741138000 |
| 6                              | -3.256804000 | 0.024906000  | 0.886153000  | 1  | -0.944846000 | -1.970801000 | -3.718706000 |
| 6                              | -2.686557000 | -1.164357000 | 0.129995000  | 1  | -0.046383000 | -0.720080000 | -2.841679000 |
| 6                              | -3.329954000 | -2.354117000 | -0.169577000 | 6  | 2.958382000  | -0.138645000 | 2.389600000  |
|                                |              |              |              | 1  | 3.194142000  | -1.147303000 | 2.750513000  |

|                              |              |              |              |                                |              |              |              |
|------------------------------|--------------|--------------|--------------|--------------------------------|--------------|--------------|--------------|
| 1                            | 3.569737000  | 0.582924000  | 2.945665000  | 6                              | -3.382764000 | 2.507863000  | 0.207025000  |
| 1                            | 1.914836000  | 0.079014000  | 2.612901000  | 1                              | -2.639390000 | 4.480417000  | -0.554125000 |
| 6                            | 4.784064000  | -0.030787000 | 0.727196000  | 6                              | -2.709653000 | 1.307522000  | 0.350457000  |
| 1                            | 5.196916000  | -0.953499000 | 1.147840000  | 1                              | -4.424703000 | 2.693096000  | 0.435465000  |
| 1                            | 5.086396000  | 0.038656000  | -0.322312000 | 13                             | 0.000061000  | 0.079502000  | 0.153621000  |
| 1                            | 5.231667000  | 0.803307000  | 1.276286000  | 6                              | 3.066617000  | -0.084445000 | 2.419707000  |
| <b>12-IM1 (in gas phase)</b> |              |              |              | 1                              | 2.022563000  | 0.058117000  | 2.695499000  |
| 8                            | -0.002107000 | -0.276019000 | 1.945612000  | 1                              | 3.398159000  | -1.062522000 | 2.790368000  |
| 6                            | -0.006167000 | -1.484912000 | 2.443043000  | 1                              | 3.661204000  | 0.701061000  | 2.904829000  |
| 8                            | -0.006703000 | -1.739332000 | 3.633770000  | 6                              | 4.791685000  | -0.016209000 | 0.649824000  |
| 1                            | -0.009277000 | -2.295118000 | 1.685928000  | 1                              | 5.230840000  | -0.930050000 | 1.063774000  |
| 6                            | -3.270871000 | 0.005293000  | 0.884298000  | 1                              | 5.022239000  | 0.033880000  | -0.418271000 |
| 6                            | -0.002072000 | -2.763065000 | -1.761439000 | 1                              | 5.264109000  | 0.832463000  | 1.155564000  |
| 6                            | -1.244871000 | -2.447090000 | -0.966066000 | 6                              | -0.003227000 | -4.238028000 | -2.167695000 |
| 6                            | -2.385940000 | -3.209476000 | -0.801364000 | 1                              | -0.002543000 | -4.881796000 | -1.282427000 |
| 7                            | -1.405459000 | -1.219489000 | -0.373736000 | 1                              | -0.892370000 | -4.465111000 | -2.766299000 |
| 6                            | -3.299677000 | -2.408593000 | -0.073441000 | 1                              | 0.884320000  | -4.466053000 | -2.768293000 |
| 1                            | -2.548606000 | -4.214624000 | -1.170691000 | 6                              | -0.002526000 | -1.910234000 | -3.050112000 |
| 6                            | -2.674638000 | -1.195427000 | 0.165373000  | 1                              | 0.892877000  | -2.121937000 | -3.647858000 |
| 1                            | -4.302699000 | -2.685731000 | 0.226136000  | 1                              | -0.898858000 | -2.121089000 | -3.646779000 |
| 6                            | 1.242227000  | -2.448465000 | -0.967776000 | 1                              | -0.001934000 | -0.844972000 | -2.801334000 |
| 6                            | 2.384267000  | -3.210554000 | -0.808626000 | 6                              | 0.005445000  | 4.775419000  | -1.211408000 |
| 7                            | 1.403469000  | -1.222686000 | -0.371778000 | 1                              | 0.004665000  | 5.219181000  | -0.211004000 |
| 6                            | 3.299314000  | -2.411502000 | -0.080361000 | 1                              | 0.892365000  | 5.124577000  | -1.750957000 |
| 1                            | 2.546639000  | -4.214399000 | -1.181609000 | 1                              | -0.879610000 | 5.126126000  | -1.753008000 |
| 6                            | 2.673967000  | -1.199678000 | 0.164280000  | 6                              | 0.005265000  | 2.691735000  | -2.570965000 |
| 1                            | 4.303219000  | -2.688976000 | 0.215869000  | 1                              | -0.890594000 | 3.026791000  | -3.108446000 |
| 6                            | 3.270430000  | -0.001480000 | 0.887077000  | 1                              | 0.902879000  | 3.025376000  | -3.106397000 |
| 6                            | 2.711792000  | 1.302533000  | 0.354801000  | 1                              | 0.004415000  | 1.597333000  | -2.557640000 |
| 6                            | 3.386736000  | 2.502163000  | 0.214207000  | 6                              | -3.070151000 | -0.074281000 | 2.417554000  |
| 7                            | 1.396827000  | 1.462468000  | -0.029028000 | 1                              | -3.664926000 | 0.712915000  | 2.899684000  |
| 6                            | 2.456032000  | 3.440765000  | -0.294667000 | 1                              | -3.403203000 | -1.051187000 | 2.789945000  |
| 1                            | 4.428477000  | 2.685705000  | 0.444877000  | 1                              | -2.026459000 | 0.067936000  | 2.694902000  |
| 6                            | 1.256945000  | 2.768365000  | -0.434768000 | 6                              | -4.791701000 | -0.008126000 | 0.643949000  |
| 1                            | 2.647615000  | 4.476498000  | -0.546514000 | 1                              | -5.264203000 | 0.842198000  | 1.146856000  |
| 6                            | 0.004041000  | 3.246474000  | -1.125586000 | 1                              | -5.019902000 | 0.039933000  | -0.424738000 |
| 6                            | -1.251221000 | 2.770536000  | -0.437603000 | 1                              | -5.232839000 | -0.920561000 | 1.058878000  |
| 6                            | -2.449737000 | 3.444679000  | -0.300842000 | <b>12-IM1 (in THF solvent)</b> |              |              |              |
| 7                            | -1.393703000 | 1.465292000  | -0.030824000 | 8                              | -0.001057000 | -0.238854000 | 1.922998000  |



|   |              |              |              |    |              |              |              |
|---|--------------|--------------|--------------|----|--------------|--------------|--------------|
| 6 | 5.769771000  | 0.275899000  | -2.240710000 | 6  | 0.935800000  | -0.248527000 | 2.706769000  |
| 6 | 3.589708000  | 1.754033000  | -1.006242000 | 6  | 0.738352000  | -1.465532000 | 1.838639000  |
| 6 | 4.834128000  | 1.042626000  | 1.024807000  | 6  | 1.265411000  | -2.724681000 | 2.047460000  |
| 1 | 5.085008000  | 0.780607000  | -2.925247000 | 7  | -0.207960000 | -1.507674000 | 0.841989000  |
| 1 | 6.473803000  | 1.013018000  | -1.834272000 | 6  | 0.609087000  | -3.591982000 | 1.144344000  |
| 1 | 6.338342000  | -0.468165000 | -2.809999000 | 1  | 2.024879000  | -2.994245000 | 2.769566000  |
| 1 | 6.778047000  | -0.695754000 | 0.133314000  | 6  | -0.286731000 | -2.824322000 | 0.425097000  |
| 1 | 6.359909000  | -2.064559000 | -0.929692000 | 1  | 0.779575000  | -4.655006000 | 1.033117000  |
| 1 | 5.397169000  | -1.753805000 | 0.527762000  | 13 | -1.128679000 | 0.003966000  | -0.000019000 |
| 1 | 3.140419000  | 1.445723000  | -1.952929000 | 6  | -0.621849000 | -3.227403000 | -2.063249000 |
| 1 | 4.376762000  | 2.494061000  | -1.203191000 | 1  | -0.581780000 | -2.193958000 | -2.395329000 |
| 1 | 2.808612000  | 2.213577000  | -0.389950000 | 1  | 0.391178000  | -3.645522000 | -2.071991000 |
| 1 | 5.725748000  | 1.631859000  | 0.771850000  | 1  | -1.251454000 | -3.779550000 | -2.773512000 |
| 1 | 5.132187000  | 0.211595000  | 1.669449000  | 6  | -1.491652000 | -4.821328000 | -0.396895000 |
| 1 | 4.132855000  | 1.673695000  | 1.578976000  | 1  | -1.911572000 | -4.985095000 | 0.599387000  |
| 1 | 2.162317000  | -2.173414000 | -0.738643000 | 1  | -2.184719000 | -5.218570000 | -1.145393000 |
| 6 | -1.234591000 | -3.324359000 | -0.646743000 | 1  | -0.556242000 | -5.383995000 | -0.484288000 |
| 6 | -4.535725000 | 0.370885000  | 0.180204000  | 6  | 0.188487000  | 3.178020000  | -1.904315000 |
| 6 | -4.009467000 | -0.952527000 | -0.306909000 | 1  | 0.271921000  | 2.135035000  | -2.194271000 |
| 6 | -4.739187000 | -2.066334000 | -0.672126000 | 1  | -0.372841000 | 3.707172000  | -2.684984000 |
| 7 | -2.666568000 | -1.247780000 | -0.265532000 | 1  | 1.198575000  | 3.600452000  | -1.836373000 |
| 6 | -3.804826000 | -3.112946000 | -0.857118000 | 6  | -0.575739000 | 4.830102000  | -0.249320000 |
| 1 | -5.815660000 | -2.126387000 | -0.772737000 | 1  | -1.074379000 | 5.025967000  | 0.703724000  |
| 6 | -2.554541000 | -2.586398000 | -0.589377000 | 1  | 0.441541000  | 5.233625000  | -0.208524000 |
| 1 | -4.025670000 | -4.134339000 | -1.139569000 | 1  | -1.108042000 | 5.363310000  | -1.043379000 |
| 6 | -3.734160000 | 1.521614000  | -0.366078000 | 6  | -6.008594000 | 0.526390000  | -0.206089000 |
| 6 | -4.202425000 | 2.723722000  | -0.858094000 | 1  | -6.128587000 | 0.506436000  | -1.293939000 |
| 7 | -2.365205000 | 1.553003000  | -0.241351000 | 1  | -6.601981000 | -0.285628000 | 0.227374000  |
| 6 | -3.068519000 | 3.552430000  | -1.031353000 | 1  | -6.400656000 | 1.475894000  | 0.174100000  |
| 1 | -5.236879000 | 2.985088000  | -1.042580000 | 6  | -4.445646000 | 0.400153000  | 1.724472000  |
| 6 | -1.967530000 | 2.817360000  | -0.629108000 | 1  | -4.825261000 | 1.354307000  | 2.110777000  |
| 1 | -3.065179000 | 4.576713000  | -1.382353000 | 1  | -5.024681000 | -0.426633000 | 2.154036000  |
| 6 | -0.539285000 | 3.319445000  | -0.549606000 | 1  | -3.405950000 | 0.292704000  | 2.048142000  |
| 6 | 0.220755000  | 2.630032000  | 0.564673000  | 6  | -0.225568000 | -0.199855000 | 3.730877000  |
| 6 | 1.144713000  | 3.220932000  | 1.407073000  | 1  | -1.184755000 | -0.097921000 | 3.212410000  |
| 7 | 0.085497000  | 1.290867000  | 0.887508000  | 1  | -0.252949000 | -1.125481000 | 4.318777000  |
| 6 | 1.597232000  | 2.213655000  | 2.292071000  | 1  | -0.106528000 | 0.659815000  | 4.402115000  |
| 1 | 1.458054000  | 4.256866000  | 1.395422000  | 6  | 2.251361000  | -0.390742000 | 3.479476000  |
| 6 | 0.932299000  | 1.052946000  | 1.942878000  | 1  | 2.226625000  | -1.288494000 | 4.106672000  |
| 1 | 2.307294000  | 2.332956000  | 3.100477000  | 1  | 3.083833000  | -0.468435000 | 2.774797000  |



|                                |              |              |              |    |              |              |              |
|--------------------------------|--------------|--------------|--------------|----|--------------|--------------|--------------|
| 1                              | 2.409475000  | 0.468838000  | 4.139171000  | 7  | -2.435620000 | 1.511363000  | -0.249300000 |
|                                |              |              |              | 6  | -3.216226000 | 3.562187000  | -0.811695000 |
| <b>12-TS2 (in THF solvent)</b> |              |              |              |    |              |              |              |
| 8                              | -0.494712000 | -0.076492000 | -1.720427000 | 1  | -5.372499000 | 2.950661000  | -0.755751000 |
| 6                              | 0.527643000  | -0.021710000 | -2.478988000 | 6  | -2.081444000 | 2.815460000  | -0.548752000 |
| 8                              | 1.725246000  | -0.109477000 | -2.200019000 | 1  | -3.249873000 | 4.610826000  | -1.078239000 |
| 1                              | 0.274201000  | 0.121880000  | -3.544870000 | 6  | -0.647722000 | 3.301765000  | -0.613368000 |
| 5                              | 2.850213000  | -1.044692000 | -0.899433000 | 6  | 0.188363000  | 2.628536000  | 0.459594000  |
| 8                              | 3.995337000  | -1.223137000 | -1.700991000 | 6  | 1.146575000  | 3.240795000  | 1.249106000  |
| 8                              | 3.109774000  | -0.126494000 | 0.116404000  | 7  | 0.027250000  | 1.314660000  | 0.866744000  |
| 6                              | 5.058581000  | -0.477211000 | -1.101539000 | 6  | 1.590079000  | 2.274893000  | 2.187359000  |
| 6                              | 4.293520000  | 0.586511000  | -0.252137000 | 1  | 1.475050000  | 4.269891000  | 1.179961000  |
| 6                              | 5.859065000  | -1.446891000 | -0.229032000 | 6  | 0.886570000  | 1.115584000  | 1.921543000  |
| 6                              | 5.952264000  | 0.097564000  | -2.191489000 | 1  | 2.322699000  | 2.421244000  | 2.970663000  |
| 6                              | 3.891052000  | 1.813912000  | -1.072343000 | 6  | 0.867011000  | -0.142256000 | 2.755706000  |
| 6                              | 5.013998000  | 1.030946000  | 1.012588000  | 6  | 0.690801000  | -1.395648000 | 1.934384000  |
| 1                              | 5.375310000  | 0.682202000  | -2.911696000 | 6  | 1.245223000  | -2.638375000 | 2.177640000  |
| 1                              | 6.731390000  | 0.738527000  | -1.762705000 | 7  | -0.239697000 | -1.483370000 | 0.924984000  |
| 1                              | 6.445132000  | -0.716696000 | -2.733601000 | 6  | 0.624345000  | -3.542957000 | 1.280549000  |
| 1                              | 6.739563000  | -0.971381000 | 0.216580000  | 1  | 1.990824000  | -2.877546000 | 2.924844000  |
| 1                              | 6.194972000  | -2.285699000 | -0.847130000 | 6  | -0.278443000 | -2.810474000 | 0.529814000  |
| 1                              | 5.230562000  | -1.846561000 | 0.573728000  | 1  | 0.825934000  | -4.602855000 | 1.192627000  |
| 1                              | 3.437362000  | 1.517624000  | -2.021315000 | 13 | -1.150880000 | -0.004020000 | 0.003363000  |
| 1                              | 4.750929000  | 2.464001000  | -1.271418000 | 6  | -0.379438000 | -3.305685000 | -1.944726000 |
| 1                              | 3.144504000  | 2.377629000  | -0.502757000 | 1  | -0.132680000 | -2.288624000 | -2.239072000 |
| 1                              | 5.975776000  | 1.499753000  | 0.771998000  | 1  | 0.552556000  | -3.877600000 | -1.867458000 |
| 1                              | 5.194133000  | 0.190636000  | 1.687844000  | 1  | -0.997204000 | -3.748175000 | -2.736140000 |
| 1                              | 4.395849000  | 1.764878000  | 1.539438000  | 6  | -1.432034000 | -4.832254000 | -0.327842000 |
| 1                              | 2.084878000  | -1.946804000 | -0.737531000 | 1  | -1.967491000 | -4.968736000 | 0.616623000  |
| 6                              | -1.139284000 | -3.344032000 | -0.599525000 | 1  | -2.035967000 | -5.258512000 | -1.134648000 |
| 6                              | -4.576350000 | 0.243225000  | 0.150996000  | 1  | -0.501394000 | -5.406297000 | -0.286559000 |
| 6                              | -3.983970000 | -1.021205000 | -0.415339000 | 6  | -0.082450000 | 3.102127000  | -2.039226000 |
| 6                              | -4.648112000 | -2.120553000 | -0.926021000 | 1  | -0.304271000 | 2.106084000  | -2.411080000 |
| 7                              | -2.641602000 | -1.293712000 | -0.283884000 | 1  | -0.553715000 | 3.815915000  | -2.726191000 |
| 6                              | -3.672290000 | -3.134156000 | -1.098409000 | 1  | 1.001948000  | 3.262705000  | -2.057578000 |
| 1                              | -5.710594000 | -2.199825000 | -1.118746000 | 6  | -0.620216000 | 4.820313000  | -0.362688000 |
| 6                              | -2.462123000 | -2.605473000 | -0.680740000 | 1  | -0.988435000 | 5.072582000  | 0.636001000  |
| 1                              | -3.845684000 | -4.140063000 | -1.459442000 | 1  | 0.400573000  | 5.202969000  | -0.465026000 |
| 6                              | -3.811785000 | 1.460282000  | -0.303363000 | 1  | -1.233673000 | 5.341168000  | -1.103410000 |
| 6                              | -4.325614000 | 2.694927000  | -0.651649000 | 6  | -6.048708000 | 0.363553000  | -0.250133000 |
|                                |              |              |              | 1  | -6.162462000 | 0.428460000  | -1.337134000 |

|                              |              |              |              |    |              |              |              |
|------------------------------|--------------|--------------|--------------|----|--------------|--------------|--------------|
| 1                            | -6.613568000 | -0.503861000 | 0.106153000  | 1  | -5.082985000 | 2.707629000  | -0.747079000 |
| 1                            | -6.496523000 | 1.256127000  | 0.198137000  | 1  | -2.604207000 | -1.326437000 | -1.926832000 |
| 6                            | -4.510300000 | 0.164234000  | 1.694668000  | 6  | 1.259510000  | -3.202134000 | -0.741328000 |
| 1                            | -4.933943000 | 1.069699000  | 2.145302000  | 6  | 1.846739000  | -0.396604000 | 3.397394000  |
| 1                            | -5.066906000 | -0.707302000 | 2.059992000  | 6  | 1.444344000  | -1.584690000 | 2.563142000  |
| 1                            | -3.473875000 | 0.068873000  | 2.036370000  | 6  | 1.030515000  | -2.839037000 | 2.968336000  |
| 6                            | -0.318967000 | -0.040627000 | 3.745876000  | 7  | 1.539628000  | -1.535018000 | 1.193126000  |
| 1                            | -1.268893000 | 0.047134000  | 3.206066000  | 6  | 0.871809000  | -3.607285000 | 1.788777000  |
| 1                            | -0.371583000 | -0.934253000 | 4.379847000  | 1  | 0.880399000  | -3.169223000 | 3.988554000  |
| 1                            | -0.211206000 | 0.843974000  | 4.385127000  | 6  | 1.205712000  | -2.790074000 | 0.722079000  |
| 6                            | 2.159942000  | -0.241791000 | 3.570556000  | 1  | 0.570932000  | -4.645840000 | 1.730814000  |
| 1                            | 2.134364000  | -1.114601000 | 4.230957000  | 6  | 1.056689000  | 0.821922000  | 2.989127000  |
| 1                            | 3.022474000  | -0.326336000 | 2.902171000  | 6  | 0.485988000  | 1.785057000  | 3.796040000  |
| 1                            | 2.287044000  | 0.641113000  | 4.204719000  | 7  | 0.909532000  | 1.162256000  | 1.663872000  |
|                              |              |              |              | 6  | -0.036773000 | 2.775849000  | 2.929535000  |
|                              |              |              |              | 1  | 0.456522000  | 1.782422000  | 4.878495000  |
| <b>12-IM2</b> (in gas phase) |              |              |              | 6  | 0.243499000  | 2.373375000  | 1.636028000  |
| 8                            | -0.513194000 | -0.323624000 | -0.342656000 | 1  | -0.550666000 | 3.682090000  | 3.222533000  |
| 6                            | -1.264861000 | -0.857863000 | 0.517306000  | 6  | -0.111021000 | 3.115526000  | 0.359400000  |
| 8                            | -2.468304000 | -1.186228000 | 0.332597000  | 6  | 0.965162000  | 2.937162000  | -0.689799000 |
| 1                            | -0.865873000 | -1.065896000 | 1.520127000  | 6  | 1.401413000  | 3.877114000  | -1.602873000 |
| 5                            | -3.296547000 | -0.950479000 | -1.010896000 | 7  | 1.649040000  | 1.751665000  | -0.880442000 |
| 8                            | -4.538361000 | -1.690566000 | -0.787577000 | 6  | 2.412764000  | 3.260501000  | -2.379762000 |
| 8                            | -3.670551000 | 0.450974000  | -1.078132000 | 1  | 1.041669000  | 4.893082000  | -1.700105000 |
| 6                            | -5.610959000 | -0.783311000 | -0.881366000 | 6  | 2.542005000  | 1.970876000  | -1.907473000 |
| 6                            | -4.949186000 | 0.576953000  | -0.495536000 | 1  | 2.991543000  | 3.715897000  | -3.173275000 |
| 6                            | -6.115111000 | -0.773116000 | -2.331870000 | 6  | 3.625738000  | 0.975715000  | -2.235357000 |
| 6                            | -6.736281000 | -1.231881000 | 0.047691000  | 6  | 3.108486000  | -0.438475000 | -2.294119000 |
| 6                            | -4.821364000 | 0.729953000  | 1.026733000  | 6  | 3.535810000  | -1.459999000 | -3.118302000 |
| 6                            | -5.625689000 | 1.815046000  | -1.076152000 | 7  | 2.250378000  | -0.929806000 | -1.336577000 |
| 1                            | -6.361396000 | -1.378837000 | 1.062988000  | 6  | 2.921039000  | -2.644520000 | -2.645177000 |
| 1                            | -7.551337000 | -0.496801000 | 0.070972000  | 1  | 4.222638000  | -1.371248000 | -3.950421000 |
| 1                            | -7.143436000 | -2.186199000 | -0.304904000 | 6  | 2.152641000  | -2.290173000 | -1.552652000 |
| 1                            | -7.013171000 | -0.155758000 | -2.460871000 | 1  | 3.026052000  | -3.637782000 | -3.062162000 |
| 1                            | -6.349258000 | -1.801987000 | -2.623989000 | 13 | 1.299663000  | 0.071774000  | 0.057522000  |
| 1                            | -5.326055000 | -0.399109000 | -2.991050000 | 6  | -0.147630000 | -3.263163000 | -1.382547000 |
| 1                            | -4.409542000 | -0.180716000 | 1.468733000  | 1  | -0.557249000 | -2.268905000 | -1.558020000 |
| 1                            | -5.787900000 | 0.953968000  | 1.496407000  | 1  | -0.081602000 | -3.768070000 | -2.354289000 |
| 1                            | -4.128771000 | 1.550187000  | 1.237186000  | 1  | -0.841325000 | -3.818955000 | -0.739564000 |
| 1                            | -6.667573000 | 1.897158000  | -0.739755000 | 6  | 1.834469000  | -4.631115000 | -0.798138000 |
| 1                            | -5.603858000 | 1.791843000  | -2.168394000 |    |              |              |              |



|    |              |              |              |                              |              |              |              |
|----|--------------|--------------|--------------|------------------------------|--------------|--------------|--------------|
| 6  | 3.040892000  | -0.509970000 | -2.336895000 |                              |              |              |              |
| 6  | 3.444738000  | -1.557065000 | -3.142163000 |                              |              |              |              |
| 7  | 2.200408000  | -0.971589000 | -1.346784000 |                              |              |              |              |
| 6  | 2.836521000  | -2.727133000 | -2.620492000 |                              |              |              |              |
| 1  | 4.113923000  | -1.496069000 | -3.990873000 |                              |              |              |              |
| 6  | 2.092285000  | -2.339214000 | -1.521459000 |                              |              |              |              |
| 1  | 2.928587000  | -3.732039000 | -3.011987000 |                              |              |              |              |
| 13 | 1.307602000  | 0.071045000  | 0.058076000  |                              |              |              |              |
| 6  | -0.211929000 | -3.279669000 | -1.285916000 |                              |              |              |              |
| 1  | -0.609691000 | -2.282638000 | -1.473085000 |                              |              |              |              |
| 1  | -0.174142000 | -3.806134000 | -2.247143000 |                              |              |              |              |
| 1  | -0.903473000 | -3.815584000 | -0.624272000 |                              |              |              |              |
| 6  | 1.757906000  | -4.661958000 | -0.703590000 |                              |              |              |              |
| 1  | 2.768209000  | -4.710345000 | -0.285610000 |                              |              |              |              |
| 1  | 1.112201000  | -5.332500000 | -0.128240000 |                              |              |              |              |
| 1  | 1.786103000  | -5.042727000 | -1.729241000 |                              |              |              |              |
| 6  | -1.498896000 | 2.704600000  | -0.143785000 |                              |              |              |              |
| 1  | -1.552630000 | 1.655828000  | -0.428397000 |                              |              |              |              |
| 1  | -2.225399000 | 2.877736000  | 0.660130000  |                              |              |              |              |
| 1  | -1.801349000 | 3.300140000  | -1.014479000 |                              |              |              |              |
| 6  | -0.174595000 | 4.645932000  | 0.607584000  |                              |              |              |              |
| 1  | 0.784051000  | 5.046200000  | 0.952363000  |                              |              |              |              |
| 1  | -0.476940000 | 5.188492000  | -0.293242000 |                              |              |              |              |
| 1  | -0.931385000 | 4.847457000  | 1.372091000  |                              |              |              |              |
| 6  | 1.774652000  | -0.585075000 | 4.879079000  |                              |              |              |              |
| 1  | 0.722859000  | -0.752061000 | 5.133213000  |                              |              |              |              |
| 1  | 2.348279000  | -1.467882000 | 5.180683000  |                              |              |              |              |
| 1  | 2.139032000  | 0.266755000  | 5.462176000  |                              |              |              |              |
| 6  | 3.449984000  | -0.076000000 | 3.107963000  |                              |              |              |              |
| 1  | 3.807343000  | 0.784936000  | 3.684977000  |                              |              |              |              |
| 1  | 4.043743000  | -0.956011000 | 3.382618000  |                              |              |              |              |
| 1  | 3.627247000  | 0.132088000  | 2.047269000  |                              |              |              |              |
| 6  | 4.651612000  | 1.019285000  | -1.236346000 |                              |              |              |              |
| 1  | 4.244589000  | 0.775464000  | -0.248412000 |                              |              |              |              |
| 1  | 5.474987000  | 0.324801000  | -1.441079000 |                              |              |              |              |
| 1  | 5.049538000  | 2.040049000  | -1.194303000 |                              |              |              |              |
| 6  | 4.211415000  | 1.239097000  | -3.674479000 |                              |              |              |              |
| 1  | 5.028763000  | 0.542643000  | -3.886062000 |                              |              |              |              |
| 1  | 3.487801000  | 1.183312000  | -4.493781000 |                              |              |              |              |
| 1  | 4.636625000  | 2.247568000  | -3.654060000 |                              |              |              |              |
|    |              |              |              | <b>12-TS3 (in gas phase)</b> |              |              |              |
|    |              |              |              | 8                            | -0.957924000 | 0.215042000  | -2.342957000 |
|    |              |              |              | 6                            | -0.078380000 | 0.210901000  | -3.186653000 |
|    |              |              |              | 8                            | 1.206760000  | 0.133113000  | -3.014551000 |
|    |              |              |              | 1                            | -0.342813000 | 0.283054000  | -4.257812000 |
|    |              |              |              | 5                            | 1.825977000  | -0.017484000 | -1.631151000 |
|    |              |              |              | 8                            | 2.692202000  | -1.176672000 | -1.666621000 |
|    |              |              |              | 8                            | 2.657050000  | 1.116407000  | -1.285897000 |
|    |              |              |              | 6                            | 3.821117000  | -0.854318000 | -0.880919000 |
|    |              |              |              | 6                            | 3.991064000  | 0.673002000  | -1.166661000 |
|    |              |              |              | 6                            | 3.494245000  | -1.127950000 | 0.588466000  |
|    |              |              |              | 6                            | 4.993055000  | -1.722446000 | -1.329355000 |
|    |              |              |              | 6                            | 4.700910000  | 0.926241000  | -2.503907000 |
|    |              |              |              | 6                            | 4.669473000  | 1.456756000  | -0.047812000 |
|    |              |              |              | 1                            | 5.136033000  | -1.659059000 | -2.411583000 |
|    |              |              |              | 1                            | 5.921872000  | -1.421066000 | -0.828125000 |
|    |              |              |              | 1                            | 4.786245000  | -2.766768000 | -1.072234000 |
|    |              |              |              | 1                            | 4.378102000  | -1.032614000 | 1.233780000  |
|    |              |              |              | 1                            | 3.086460000  | -2.140180000 | 0.678173000  |
|    |              |              |              | 1                            | 2.726332000  | -0.433182000 | 0.943876000  |
|    |              |              |              | 1                            | 4.227534000  | 0.329525000  | -3.290149000 |
|    |              |              |              | 1                            | 5.771305000  | 0.685774000  | -2.463085000 |
|    |              |              |              | 1                            | 4.587427000  | 1.984636000  | -2.760318000 |
|    |              |              |              | 1                            | 5.674108000  | 1.064107000  | 0.160864000  |
|    |              |              |              | 1                            | 4.061894000  | 1.420393000  | 0.860279000  |
|    |              |              |              | 1                            | 4.763179000  | 2.508074000  | -0.343662000 |
|    |              |              |              | 1                            | 0.869385000  | -0.120069000 | -0.831757000 |
|    |              |              |              | 6                            | -0.730852000 | -3.267514000 | -0.586633000 |
|    |              |              |              | 6                            | -4.234217000 | 0.280339000  | -0.030165000 |
|    |              |              |              | 6                            | -3.596696000 | -0.982107000 | -0.549185000 |
|    |              |              |              | 6                            | -4.227059000 | -2.083315000 | -1.091895000 |
|    |              |              |              | 7                            | -2.269216000 | -1.261822000 | -0.315875000 |
|    |              |              |              | 6                            | -3.246284000 | -3.100731000 | -1.194212000 |
|    |              |              |              | 1                            | -5.274485000 | -2.159669000 | -1.355354000 |
|    |              |              |              | 6                            | -2.069346000 | -2.572280000 | -0.701637000 |
|    |              |              |              | 1                            | -3.391068000 | -4.106283000 | -1.568152000 |
|    |              |              |              | 6                            | -3.411020000 | 1.503638000  | -0.338039000 |
|    |              |              |              | 6                            | -3.867189000 | 2.758622000  | -0.686124000 |
|    |              |              |              | 7                            | -2.055613000 | 1.539409000  | -0.100889000 |



|    |              |              |              |   |              |              |              |
|----|--------------|--------------|--------------|---|--------------|--------------|--------------|
| 1  | 0.830570000  | -0.141689000 | -0.798835000 | 1 | -0.311199000 | -3.433357000 | -2.694472000 |
| 6  | -0.638300000 | -3.284313000 | -0.552508000 | 6 | -0.825836000 | -4.806850000 | -0.461761000 |
| 6  | -4.242424000 | 0.176317000  | -0.037215000 | 1 | -1.421051000 | -5.089899000 | 0.411869000  |
| 6  | -3.569295000 | -1.075544000 | -0.537868000 | 1 | -1.325707000 | -5.182442000 | -1.360044000 |
| 6  | -4.169583000 | -2.202951000 | -1.063260000 | 1 | 0.145860000  | -5.306977000 | -0.399760000 |
| 7  | -2.230632000 | -1.312866000 | -0.311750000 | 6 | 0.437762000  | 3.178176000  | -1.562212000 |
| 6  | -3.159249000 | -3.194675000 | -1.155517000 | 1 | 0.541532000  | 2.135359000  | -1.845307000 |
| 1  | -5.215775000 | -2.314885000 | -1.317971000 | 1 | -0.104208000 | 3.708902000  | -2.355559000 |
| 6  | -1.994717000 | -2.624848000 | -0.675498000 | 1 | 1.449827000  | 3.588025000  | -1.477721000 |
| 1  | -3.279604000 | -4.210739000 | -1.509140000 | 6 | -0.371277000 | 4.834191000  | 0.079430000  |
| 6  | -3.453166000 | 1.411039000  | -0.388277000 | 1 | -0.904671000 | 5.037173000  | 1.013158000  |
| 6  | -3.941577000 | 2.640484000  | -0.784626000 | 1 | 0.640799000  | 5.242672000  | 0.159814000  |
| 7  | -2.099664000 | 1.494515000  | -0.143313000 | 1 | -0.870517000 | 5.373972000  | -0.731244000 |
| 6  | -2.840779000 | 3.534190000  | -0.776806000 | 6 | -5.662982000 | 0.275815000  | -0.600003000 |
| 1  | -4.971297000 | 2.879090000  | -1.018812000 | 1 | -5.657485000 | 0.339026000  | -1.693021000 |
| 6  | -1.735638000 | 2.808893000  | -0.369701000 | 1 | -6.251314000 | -0.599228000 | -0.306338000 |
| 1  | -2.862269000 | 4.586462000  | -1.029601000 | 1 | -6.169568000 | 1.161535000  | -0.203781000 |
| 6  | -0.318919000 | 3.327640000  | -0.228207000 | 6 | -4.355202000 | 0.086516000  | 1.503261000  |
| 6  | 0.402634000  | 2.625384000  | 0.905517000  | 1 | -4.843141000 | 0.982320000  | 1.905644000  |
| 6  | 1.338463000  | 3.178295000  | 1.761655000  | 1 | -4.936876000 | -0.796108000 | 1.795193000  |
| 7  | 0.179361000  | 1.306250000  | 1.249627000  | 1 | -3.365057000 | 0.004511000  | 1.964371000  |
| 6  | 1.697990000  | 2.166003000  | 2.687827000  | 6 | -0.562390000 | -0.074236000 | 3.959825000  |
| 1  | 1.715041000  | 4.192787000  | 1.737865000  | 1 | -1.408341000 | 0.009623000  | 3.269093000  |
| 6  | 0.961375000  | 1.043269000  | 2.354774000  | 1 | -0.727477000 | -0.954860000 | 4.591989000  |
| 1  | 2.376163000  | 2.265599000  | 3.526122000  | 1 | -0.554099000 | 0.821910000  | 4.592063000  |
| 6  | 0.770184000  | -0.205352000 | 3.183950000  | 6 | 1.899845000  | -0.329615000 | 4.211258000  |
| 6  | 0.712592000  | -1.449164000 | 2.333284000  | 1 | 1.750367000  | -1.213216000 | 4.839438000  |
| 6  | 1.212310000  | -2.702046000 | 2.634978000  | 1 | 2.875786000  | -0.413836000 | 3.720643000  |
| 7  | 0.008573000  | -1.491973000 | 1.150719000  | 1 | 1.916214000  | 0.543080000  | 4.871707000  |
| 6  | 0.801727000  | -3.563533000 | 1.586446000  |   |              |              |              |
| 1  | 1.801123000  | -2.969031000 | 3.503184000  |   |              |              |              |
| 6  | 0.061539000  | -2.798799000 | 0.701860000  |   |              |              |              |
| 1  | 1.008354000  | -4.622720000 | 1.501785000  |   |              |              |              |
| 13 | -0.845140000 | 0.006910000  | 0.168196000  |   |              |              |              |
| 6  | 0.201421000  | -3.019884000 | -1.816576000 |   |              |              |              |
| 1  | 0.348664000  | -1.956183000 | -1.975105000 |   |              |              |              |
| 1  | 1.192770000  | -3.475707000 | -1.727117000 |   |              |              |              |
